# Supplementary material for: Transcriptome Analysis of Methyl Jasmonate-Elicited Panax ginseng Adventitious Roots to Discover Putative Ginsenoside Biosynthesis and Transport Genes
Source: MDPI journal article supplement (doi:10.3390/ijms16023035), 2015-01-29
Supplement: s1 [file s1]

## Sheet: Table S1
Table S1 Summary of gene ontology (GO) functional classification
GO ontologies	Categories	Number of unigenes	Percent of unigenes
Biological process	cellular process	27742	64.4399
	metabolic process	26407	61.3389
	single-organism process	19510	45.3183
	response to stimulus	13912	32.3152
	biological regulation	11299	26.2456
	regulation of biological process	10362	24.0691
	cellular component organization or biogenesis	8447	19.6209
	multi-cellular organismal process	8435	19.593
	developmental process	8434	19.5907
	localization	7783	18.0786
	establishment of localization	7326	17.017
	reproduction	5191	12.0578
	reproductive process	4815	11.1844
	signaling	4152	9.64438
	multi-organism process	3687	8.56426
	negative regulation of biological process	2737	6.35758
	positive regulation of biological process	2313	5.3727
	growth	1984	4.60849
	immune system process	1725	4.00688
	biological adhesion	345	0.801375
	rhythmic process	283	0.65736
	locomotion	37	0.0859446
	cell killing	1	0.00232283
Cellular component	cell	33008	76.6719
	cell part	33007	76.6695
	organelle	26291	61.0694
	membrane	13708	31.8413
	organelle part	8222	19.0983
	membrane part	5146	11.9533
	macromolecular complex	5110	11.8696
	extracellular region	2243	5.2101
	cell junction	1902	4.41802
	symplast	1900	4.41337
	membrane-enclosed lumen	1839	4.27168
	nucleoid	104	0.241574
	extracellular matrix	39	0.0905902
	extracellular matrix part	22	0.0511022
	extracellular region part	21	0.0487794
	virion	16	0.0371652
	virion part	16	0.0371652
Molecular function	catalytic activity	21823	50.691
	binding	21675	50.3473
	transporter activity	3017	7.00797
	nucleic acid binding transcription factor activity	1019	2.36696
	structural molecule activity	832	1.93259
	molecular transducer activity	796	1.84897
	electron carrier activity	623	1.44712
	enzyme regulator activity	518	1.20322
	receptor activity	358	0.831572
	antioxidant activity	250	0.580707
	protein binding transcription factor activity	157	0.364684
	nutrient reservoir activity	49	0.113818
	translation regulator activity	11	0.0255511
	metallochaperone activity	10	0.0232283
	protein tag	3	0.00696848
	channel regulator activity	1	0.00232283

## Sheet: Table S2
Table S2 Summary of assigned unigenes to 25 clusters of orthologous groups (COG)
Code	COG categories	Number of unigenes	Percent of unigenes
A	RNA processing and modification	330	0.0165
B	Chromatin structure and dynamics	402	0.0201
C	Energy production and conversion	1305	0.0653
D	Cell cycle control, cell division, chromosome partitioning	1391	0.0696
E	Amino acid transport and metabolism	1318	0.0659
F	Nucleotide transport and metabolism	373	0.0187
G	Carbohydrate transport and metabolism	2113	0.1057
H	Coenzyme transport and metabolism	699	0.035
I	Lipid transport and metabolism	906	0.0453
J	Translation, ribosomal structure and biogenesis	2400	0.1201
K	Transcription	3459	0.1731
L	Replication, recombination and repair	3275	0.1639
M	Cell wall/membrane/envelope biogenesis	1436	0.0719
N	Cell motility	269	0.0135
O	Posttranslational modification, protein turnover, chaperones	2672	0.1337
P	Inorganic ion transport and metabolism	1036	0.0518
Q	Secondary metabolites biosynthesis, transport and catabolism	1029	0.0515
R	General function prediction only	6308	0.3156
S	Function unknown	1610	0.0806
T	Signal transduction mechanisms	2470	0.1236
U	Intracellular trafficking, secretion, and vesicular transport	998	0.0499
V	Defense mechanisms	488	0.0244
W	Extracellular structures	22	0.0011
Y	Nuclear structure	43	0.0022
Z	Cytoskeleton	652	0.0326

## Sheet: Table S3
Table S3 Assigned unigenes to 3 levels including 128 pathways analyzed by KEGG
Categories (Level 1)	Sub-categories (Level 2)	Pathways (Level 3)	Number of unigenes	Percent of unigenes
Cellular Processes	Transport and catabolism	Endocytosis	832	0.0258385
		Peroxisome	297	0.0092236
		Phagosome	372	0.0115528
		Regulation of autophagy	180	0.00559006
Environmental Information Processing	Membrane transport	ABC transporters	382	0.0118634
	Signal transduction	Phosphatidylinositol signaling system	273	0.00847826
		Plant hormone signal transduction	1655	0.0513975
Genetic Information Processing	Folding, sorting and degradation	Proteasome	181	0.00562112
		Protein export	194	0.00602484
		Protein processing in endoplasmic reticulum	870	0.0270186
		RNA degradation	606	0.0188199
		SNARE interactions in vesicular transport	156	0.00484472
		Sulfur relay system	23	0.000714286
		Ubiquitin mediated proteolysis	647	0.0200932
	Replication and repair	Base excision repair	170	0.0052795
		DNA replication	202	0.00627329
		Homologous recombination	285	0.00885093
		Mismatch repair	164	0.00509317
		Non-homologous end-joining	32	0.000993789
		Nucleotide excision repair	263	0.0081677
	Transcription	Aminoacyl-tRNA biosynthesis	258	0.00801242
		Basal transcription factors	255	0.00791925
		mRNA surveillance pathway	702	0.0218012
		Ribosome	618	0.0191925
		Ribosome biogenesis in eukaryotes	653	0.0202795
		RNA polymerase	325	0.0100932
		RNA transport	1250	0.0388199
		Spliceosome	1231	0.0382298
Metabolism	Amino acid metabolism	Alanine, aspartate and glutamate metabolism	144	0.00447205
		Arginine and proline metabolism	243	0.00754658
		Cysteine and methionine metabolism	258	0.00801242
		Glycine, serine and threonine metabolism	174	0.00540373
		Histidine metabolism	107	0.00332298
		Lysine biosynthesis	36	0.00111801
		Lysine degradation	98	0.00304348
		Phenylalanine metabolism	205	0.00636646
		Phenylalanine, tyrosine and tryptophan biosynthesis	123	0.00381988
		Tryptophan metabolism	118	0.0036646
		Tyrosine metabolism	153	0.00475155
		Valine, leucine and isoleucine biosynthesis	92	0.00285714
		Valine, leucine and isoleucine degradation	155	0.00481366
	Biosynthesis of other secondary metabolites	Anthocyanin biosynthesis	13	0.000403727
		Benzoxazinoid biosynthesis	51	0.00158385
		Betalain biosynthesis	2	6.21118e-05
		Caffeine metabolism	5	0.00015528
		Flavone and flavonol biosynthesis	105	0.00326087
		Flavonoid biosynthesis	231	0.00717391
		Glucosinolate biosynthesis	30	0.000931677
		Indole alkaloid biosynthesis	19	0.000590062
		Isoflavonoid biosynthesis	61	0.00189441
		Isoquinoline alkaloid biosynthesis	60	0.00186335
		Phenylpropanoid biosynthesis	432	0.0134161
		Stilbenoid, diarylheptanoid and gingerol biosynthesis	222	0.00689441
		Tropane, piperidine and pyridine alkaloid biosynthesis	49	0.00152174
	Carbohydrate metabolism	Amino sugar and nucleotide sugar metabolism	450	0.0139752
		Ascorbate and aldarate metabolism	215	0.00667702
		Butanoate metabolism	106	0.00329193
		C5-Branched dibasic acid metabolism	21	0.000652174
		Citrate cycle (TCA cycle)	240	0.00745342
		Fructose and mannose metabolism	237	0.00736025
		Galactose metabolism	278	0.00863354
		Glycolysis / Gluconeogenesis	459	0.0142547
		Glyoxylate and dicarboxylate metabolism	199	0.00618012
		Inositol phosphate metabolism	231	0.00717391
		Pentose and glucuronate interconversions	334	0.0103727
		Pentose phosphate pathway	148	0.00459627
		Propanoate metabolism	195	0.0060559
		Pyruvate metabolism	374	0.0116149
		Starch and sucrose metabolism	777	0.0241304
	Energy metabolism	Carbon fixation in photosynthetic organisms	251	0.00779503
		Nitrogen metabolism	135	0.00419255
		Oxidative phosphorylation	445	0.0138199
		Photosynthesis	95	0.00295031
		Photosynthesis - antenna proteins	32	0.000993789
		Sulfur metabolism	97	0.00301242
	Global map	Biosynthesis of secondary metabolites	3419	0.10618
		Metabolic pathways	7137	0.221646
	Glycan biosynthesis and metabolism	Glycosaminoglycan degradation	134	0.00416149
		Glycosphingolipid biosynthesis - ganglio series	90	0.00279503
		Glycosphingolipid biosynthesis - globo series	33	0.00102484
		Glycosylphosphatidylinositol(GPI)-anchor biosynthesis	151	0.00468944
		N-Glycan biosynthesis	171	0.00531056
		Other glycan degradation	248	0.00770186
		Other types of O-glycan biosynthesis	80	0.00248447
	Lipid metabolism	alpha-Linolenic acid metabolism	164	0.00509317
		Arachidonic acid metabolism	69	0.00214286
		Biosynthesis of unsaturated fatty acids	161	0.005
		Cutin, suberine and wax biosynthesis	92	0.00285714
		Ether lipid metabolism	544	0.0168944
		Fatty acid biosynthesis	118	0.0036646
		Fatty acid elongation	54	0.00167702
		Fatty acid metabolism	181	0.00562112
		Glycerolipid metabolism	216	0.00670807
		Glycerophospholipid metabolism	800	0.0248447
		Linoleic acid metabolism	59	0.0018323
		Sphingolipid metabolism	178	0.00552795
		Steroid biosynthesis	121	0.00375776
		Synthesis and degradation of ketone bodies	24	0.000745342
	Metabolism of cofactors and vitamins	Biotin metabolism	13	0.000403727
		Folate biosynthesis	40	0.00124224
		Lipoic acid metabolism	30	0.000931677
		Nicotinate and nicotinamide metabolism	93	0.0028882
		One carbon pool by folate	58	0.00180124
		Pantothenate and CoA biosynthesis	74	0.00229814
		Porphyrin and chlorophyll metabolism	163	0.00506211
		Riboflavin metabolism	63	0.00195652
		Thiamine metabolism	36	0.00111801
		Ubiquinone and other terpenoid-quinone biosynthesis	115	0.00357143
		Vitamin B6 metabolism	37	0.00114907
	Metabolism of other amino acids	beta-Alanine metabolism	116	0.00360248
		Cyanoamino acid metabolism	157	0.00487578
		Glutathione metabolism	208	0.00645963
		Selenocompound metabolism	88	0.00273292
		Taurine and hypotaurine metabolism	38	0.00118012
	Metabolism of terpenoids and polyketides	Brassinosteroid biosynthesis	92	0.00285714
		Carotenoid biosynthesis	180	0.00559006
		Diterpenoid biosynthesis	121	0.00375776
		Limonene and pinene degradation	194	0.00602484
		Monoterpenoid biosynthesis	37	0.00114907
		Sesquiterpenoid and triterpenoid biosynthesis	60	0.00186335
		Terpenoid backbone biosynthesis	226	0.00701863
		Zeatin biosynthesis	234	0.00726708
	Nucleotide metabolism	Purine metabolism	790	0.0245342
		Pyrimidine metabolism	631	0.0195963
Organismal Systems	Environmental adaptation	Circadian rhythm - mammal	38	0.00118012
		Circadian rhythm - plant	258	0.00801242
		Plant-pathogen interaction	1672	0.0519255
	Immune system	Natural killer cell mediated cytotoxicity	162	0.00503106

## Sheet: Table S4
Table S4 List of expressed unigenes along with FPKM values
Unigene ID	Length	FPKM (Pg-Con)	FPKM (Pg-MeJA)	Expression
CL7079.Contig2	342	0	9.0371	Up
Unigene32286	217	0	7.9431	Up
Unigene32272	267	0	7.346	Up
CL7153.Contig2	268	0	7.3186	Up
Unigene31906	285	0	6.8821	Up
Unigene33962	227	0	6.284	Up
Unigene33893	240	0	4.953	Up
Unigene31369	297	0	4.8029	Up
Unigene34192	261	0	4.7822	Up
Unigene30008	265	0	4.4858	Up
Unigene31380	212	0	3.6447	Up
CL8792.Contig2	580	0	3.5867	Up
Unigene31348	216	0	3.5772	Up
Unigene34280	236	0	3.5259	Up
Unigene30967	203	0	3.5135	Up
Unigene34517	306	0	3.4962	Up
Unigene31414	259	0	3.4423	Up
Unigene32865	209	0	3.4126	Up
Unigene31261	210	0	3.3964	Up
Unigene29904	264	0	3.3771	Up
Unigene34583	321	0	3.3329	Up
Unigene34439	305	0	3.3128	Up
Unigene31346	218	0	3.2717	Up
Unigene34490	327	0	3.2717	Up
Unigene34198	202	0	3.2366	Up
Unigene33021	202	0	3.2366	Up
Unigene34932	208	0	3.1433	Up
Unigene31624	233	0	3.0611	Up
Unigene34569	275	0	3.0258	Up
Unigene34874	258	0	2.9948	Up
CL10031.Contig2	239	0	2.9842	Up
Unigene34865	222	0	2.945	Up
Unigene34692	204	0	2.6222	Up
Unigene31412	227	0	2.6183	Up
CL2627.Contig2	252	0	2.5944	Up
Unigene34401	436	0	2.5901	Up
Unigene34495	209	0	2.5595	Up
Unigene34820	258	0	2.5341	Up
Unigene34945	260	0	2.5146	Up
Unigene35079	214	0	2.4997	Up
Unigene32725	216	0	2.4765	Up
Unigene33471	218	0	2.4538	Up
CL1642.Contig1	560	0	2.4411	Up
Unigene34830	270	0	2.4215	Up
CL9882.Contig2	304	0	2.3462	Up
Unigene34862	229	0	2.3359	Up
Unigene34987	256	0	2.3217	Up
Unigene31350	206	0	2.3082	Up
Unigene35049	311	0	2.2934	Up
Unigene35008	223	0	2.1322	Up
Unigene35043	279	0	2.1303	Up
Unigene35090	281	0	2.1152	Up
CL10267.Contig2	225	0	2.1133	Up
CL566.Contig5	428	0	2.083	Up
Unigene34842	201	0	2.0699	Up
CL11283.Contig1	231	0	2.0584	Up
Unigene32276	261	0	2.0495	Up
Unigene35048	203	0	2.0495	Up
Unigene35035	207	0	2.0099	Up
CL10618.Contig5	298	0	1.9945	Up
Unigene34855	328	0	1.9933	Up
CL5761.Contig2	383	0	1.8622	Up
Unigene30880	342	0	1.7379	Up
CL4720.Contig1	411	0	1.7354	Up
Unigene34618	206	0	1.7312	Up
Unigene30262	212	0	1.6822	Up
CL6530.Contig2	443	0	1.61	Up
CL5166.Contig1	234	0	1.524	Up
CL2016.Contig4	434	0	1.5064	Up
CL4499.Contig1	205	0	1.4497	Up
CL7828.Contig1	370	0	1.4457	Up
CL5078.Contig2	224	0	1.3267	Up
CL7022.Contig1	226	0	1.315	Up
CL7158.Contig2	1039	0	1.2013	Up
Unigene31860	211	0	1.1268	Up
CL1095.Contig7	268	0	1.1089	Up
CL4479.Contig2	303	0	0.9808	Up
CL2327.Contig2	436	0	0.9543	Up
Unigene33482	323	0	0.9201	Up
CL547.Contig6	324	0	0.9172	Up
Unigene29698	261	0	0.9109	Up
CL3882.Contig1	264	0	0.9005	Up
Unigene33480	265	0	0.8972	Up
CL3916.Contig2	403	0	0.8849	Up
CL6380.Contig4	204	0	0.8741	Up
CL355.Contig2	272	0	0.8741	Up
CL3716.Contig2	209	0	0.8532	Up
Unigene29802	283	0	0.8401	Up
CL10158.Contig2	354	0	0.8395	Up
CL2830.Contig2	223	0	0.7996	Up
CL2757.Contig2	223	0	0.7996	Up
CL8678.Contig1	459	0	0.7769	Up
CL401.Contig5	317	0	0.75	Up
CL2933.Contig2	238	0	0.7492	Up
Unigene29830	405	0	0.7338	Up
CL8631.Contig2	243	0	0.7338	Up
CL3476.Contig1	245	0	0.7278	Up
CL9.Contig14	1032	0	0.6911	Up
CL4908.Contig13	693	0	0.6861	Up
Unigene33651	348	0	0.6832	Up
CL7516.Contig2	349	0	0.6812	Up
CL9787.Contig2	264	0	0.6754	Up
CL3688.Contig2	529	0	0.6741	Up
CL1299.Contig3	353	0	0.6735	Up
CL1372.Contig7	364	0	0.6531	Up
CL8847.Contig4	280	0	0.6368	Up
CL3688.Contig3	562	0	0.6346	Up
CL2216.Contig4	378	0	0.629	Up
CL11010.Contig1	296	0	0.6024	Up
Unigene30539	395	0	0.6019	Up
CL4641.Contig2	303	0	0.5885	Up
Unigene24624	205	0	0.5799	Up
CL10752.Contig2	207	0	0.5743	Up
CL10879.Contig2	209	0	0.5688	Up
CL3688.Contig1	632	0	0.5643	Up
CL5357.Contig2	214	0	0.5555	Up
Unigene30232	434	0	0.5478	Up
Unigene23282	435	0	0.5465	Up
CL10957.Contig2	435	0	0.5465	Up
Unigene27123	328	0	0.5436	Up
CL6064.Contig3	222	0	0.5355	Up
CL391.Contig5	334	0	0.5339	Up
CL8719.Contig3	336	0	0.5307	Up
Unigene30161	224	0	0.5307	Up
Unigene33332	794	0	0.524	Up
CL9663.Contig2	457	0	0.5202	Up
Unigene27605	350	0	0.5095	Up
Unigene33213	236	0	0.5037	Up
CL4787.Contig2	240	0	0.4953	Up
CL472.Contig2	243	0	0.4892	Up
CL11620.Contig2	367	0	0.4859	Up
CL5732.Contig5	376	0	0.4742	Up
CL10376.Contig3	382	0	0.4668	Up
Unigene32646	392	0	0.4549	Up
Unigene22604	263	0	0.452	Up
CL1817.Contig1	395	0	0.4514	Up
CL7395.Contig4	798	0	0.4469	Up
Unigene33773	403	0	0.4425	Up
CL8883.Contig1	269	0	0.4419	Up
CL1992.Contig4	947	0	0.4393	Up
CL6898.Contig2	274	0	0.4338	Up
CL7831.Contig1	961	0	0.4329	Up
Unigene29661	559	0	0.4253	Up
CL11313.Contig4	425	0	0.4195	Up
CL474.Contig2	428	0	0.4166	Up
Unigene29552	433	0	0.4118	Up
Unigene22646	291	0	0.4085	Up
CL4880.Contig1	439	0	0.4062	Up
Unigene3617	448	0	0.398	Up
Unigene32856	598	0	0.3976	Up
CL1402.Contig11	451	0	0.3954	Up
CL2305.Contig6	607	0	0.3917	Up
CL6421.Contig3	307	0	0.3872	Up
CL6572.Contig4	623	0	0.3816	Up
Unigene26987	312	0	0.381	Up
Unigene8504	471	0	0.3786	Up
CL8983.Contig1	315	0	0.3774	Up
Unigene29792	481	0	0.3707	Up
CL453.Contig4	818	0	0.3633	Up
CL459.Contig2	331	0	0.3591	Up
CL3688.Contig8	501	0	0.3559	Up
CL4641.Contig6	335	0	0.3548	Up
CL6800.Contig1	673	0	0.3533	Up
CL2538.Contig4	675	0	0.3522	Up
CL9213.Contig1	512	0	0.3483	Up
CL9046.Contig2	342	0	0.3476	Up
CL1402.Contig10	343	0	0.3466	Up
Unigene29568	692	0	0.3436	Up
Unigene9049	524	0	0.3403	Up
Unigene27458	526	0	0.339	Up
CL7305.Contig2	533	0	0.3345	Up
CL6088.Contig10	356	0	0.3339	Up
CL317.Contig3	536	0	0.3327	Up
CL974.Contig3	717	0	0.3316	Up
Unigene30878	360	0	0.3302	Up
CL317.Contig4	553	0	0.3224	Up
CL4480.Contig3	569	0	0.3134	Up
CL3688.Contig5	571	0	0.3123	Up
Unigene22036	392	0	0.3032	Up
CL3688.Contig7	604	0	0.2952	Up
CL9691.Contig2	606	0	0.2942	Up
CL7259.Contig3	405	0	0.2935	Up
Unigene27569	406	0	0.2928	Up
Unigene22832	410	0	0.2899	Up
CL1822.Contig4	410	0	0.2899	Up
CL10578.Contig1	205	0	0.2899	Up
Unigene16476	618	0	0.2885	Up
CL5280.Contig2	206	0	0.2885	Up
CL4351.Contig5	621	0	0.2871	Up
CL229.Contig17	628	0	0.2839	Up
CL1294.Contig8	648	0	0.2752	Up
CL6278.Contig2	218	0	0.2726	Up
CL10470.Contig1	219	0	0.2714	Up
CL2428.Contig1	219	0	0.2714	Up
CL1992.Contig1	1326	0	0.2689	Up
CL4641.Contig4	443	0	0.2683	Up
CL1344.Contig1	443	0	0.2683	Up
CL11233.Contig4	224	0	0.2653	Up
Unigene18009	226	0	0.263	Up
CL8847.Contig1	455	0	0.2613	Up
CL333.Contig5	683	0	0.2611	Up
Unigene33080	229	0	0.2595	Up
Unigene22750	229	0	0.2595	Up
CL4661.Contig1	229	0	0.2595	Up
Unigene32867	230	0	0.2584	Up
CL10815.Contig2	231	0	0.2573	Up
CL250.Contig6	702	0	0.254	Up
CL10007.Contig1	235	0	0.2529	Up
CL9.Contig16	706	0	0.2526	Up
CL1762.Contig5	1656	0	0.2512	Up
CL3476.Contig2	240	0	0.2477	Up
CL4743.Contig1	243	0	0.2446	Up
Unigene29730	245	0	0.2426	Up
CL4480.Contig1	739	0	0.2413	Up
CL8083.Contig1	253	0	0.2349	Up
Unigene30556	254	0	0.234	Up
Unigene22603	765	0	0.2331	Up
CL1551.Contig4	257	0	0.2313	Up
CL1402.Contig1	775	0	0.2301	Up
CL4817.Contig5	782	0	0.228	Up
Unigene22077	1054	0	0.2256	Up
CL3251.Contig1	265	0	0.2243	Up
CL6981.Contig2	531	0	0.2239	Up
CL4351.Contig4	539	0	0.2205	Up
CL11581.Contig4	543	0	0.2189	Up
CL3911.Contig8	818	0	0.218	Up
Unigene30575	273	0	0.2177	Up
Unigene33402	273	0	0.2177	Up
Unigene32949	547	0	0.2173	Up
CL2526.Contig2	549	0	0.2165	Up
CL2541.Contig9	549	0	0.2165	Up
CL6898.Contig1	276	0	0.2153	Up
Unigene32115	276	0	0.2153	Up
CL125.Contig5	1105	0	0.2152	Up
CL6017.Contig2	281	0	0.2115	Up
CL1582.Contig5	282	0	0.2108	Up
CL1644.Contig7	1427	0	0.2083	Up
CL250.Contig5	576	0	0.2064	Up
Unigene22194	585	0	0.2032	Up
CL1953.Contig11	293	0	0.2029	Up
Unigene33695	296	0	0.2008	Up
CL2297.Contig1	598	0	0.1988	Up
CL1372.Contig3	905	0	0.197	Up
Unigene22279	304	0	0.1955	Up
CL4562.Contig3	1226	0	0.1939	Up
CL1644.Contig12	616	0	0.193	Up
Unigene387	310	0	0.1917	Up
CL3911.Contig7	931	0	0.1915	Up
CL1465.Contig5	621	0	0.1914	Up
CL2976.Contig7	1869	0	0.1908	Up
CL503.Contig2	312	0	0.1905	Up
CL1402.Contig3	938	0	0.1901	Up
CL318.Contig3	314	0	0.1893	Up
CL5360.Contig2	1577	0	0.1884	Up
CL1598.Contig10	632	0	0.1881	Up
CL3911.Contig11	952	0	0.1873	Up
CL2725.Contig9	318	0	0.1869	Up
CL11071.Contig3	325	0	0.1829	Up
CL8126.Contig2	326	0	0.1823	Up
CL4503.Contig2	329	0	0.1807	Up
Unigene25728	330	0	0.1801	Up
CL3654.Contig1	1016	0	0.1755	Up
CL3722.Contig5	678	0	0.1753	Up
CL5075.Contig2	342	0	0.1738	Up
CL7495.Contig3	346	0	0.1718	Up
CL11584.Contig1	347	0	0.1713	Up
CL5107.Contig4	695	0	0.171	Up
CL4482.Contig1	350	0	0.1698	Up
CL2661.Contig2	354	0	0.1679	Up
CL3911.Contig9	1065	0	0.1674	Up
CL5521.Contig6	363	0	0.1637	Up
Unigene29755	1094	0	0.163	Up
Unigene22429	1102	0	0.1618	Up
CL3911.Contig2	1478	0	0.1609	Up
Unigene33481	370	0	0.1606	Up
Unigene19323	372	0	0.1598	Up
CL2212.Contig2	373	0	0.1593	Up
Unigene29765	2240	0	0.1592	Up
CL10986.Contig4	1124	0	0.1586	Up
Unigene33463	375	0	0.1585	Up
CL11557.Contig5	383	0	0.1552	Up
CL9413.Contig1	384	0	0.1548	Up
CL2622.Contig16	1153	0	0.1546	Up
CL1487.Contig5	1547	0	0.1537	Up
CL4934.Contig6	387	0	0.1536	Up
CL5812.Contig3	389	0	0.1528	Up
CL2576.Contig3	2020	0	0.1471	Up
CL2622.Contig3	1214	0	0.1469	Up
CL2526.Contig5	405	0	0.1468	Up
CL1616.Contig4	1627	0	0.1461	Up
CL1182.Contig8	819	0	0.1451	Up
CL8478.Contig2	413	0	0.1439	Up
CL2622.Contig15	1239	0	0.1439	Up
CL825.Contig2	1242	0	0.1436	Up
CL537.Contig2	2072	0	0.1434	Up
CL2622.Contig8	1257	0	0.1419	Up
Unigene30225	422	0	0.1408	Up
CL1033.Contig7	856	0	0.1389	Up
CL4699.Contig6	1285	0	0.1388	Up
CL2919.Contig7	430	0	0.1382	Up
Unigene22764	431	0	0.1379	Up
CL2492.Contig3	873	0	0.1362	Up
CL8269.Contig1	437	0	0.136	Up
CL7926.Contig3	440	0	0.1351	Up
CL2622.Contig1	1326	0	0.1345	Up
CL2541.Contig7	888	0	0.1339	Up
CL4105.Contig2	450	0	0.1321	Up
CL4863.Contig12	907	0	0.1311	Up
Unigene21703	454	0	0.1309	Up
CL4699.Contig5	1377	0	0.1295	Up
CL1033.Contig3	920	0	0.1292	Up
CL7102.Contig3	922	0	0.1289	Up
CL4349.Contig5	467	0	0.1273	Up
CL2431.Contig6	468	0	0.127	Up
CL123.Contig3	469	0	0.1267	Up
CL4415.Contig2	473	0	0.1257	Up
Unigene29710	955	0	0.1245	Up
CL3979.Contig2	1443	0	0.1236	Up
CL3753.Contig9	486	0	0.1223	Up
CL8171.Contig3	973	0	0.1222	Up
CL2577.Contig6	487	0	0.122	Up
CL5207.Contig2	490	0	0.1213	Up
CL6168.Contig1	498	0	0.1193	Up
CL51.Contig8	501	0	0.1186	Up
CL11620.Contig3	504	0	0.1179	Up
CL1616.Contig5	1523	0	0.1171	Up
CL1033.Contig12	1016	0	0.117	Up
CL7128.Contig1	509	0	0.1168	Up
CL2914.Contig8	1020	0	0.1165	Up
CL1294.Contig9	510	0	0.1165	Up
CL3911.Contig6	1532	0	0.1164	Up
CL1282.Contig2	1023	0	0.1162	Up
CL6432.Contig6	512	0	0.1161	Up
CL4351.Contig2	518	0	0.1147	Up
CL914.Contig6	518	0	0.1147	Up
CL2780.Contig4	518	0	0.1147	Up
CL565.Contig13	518	0	0.1147	Up
CL251.Contig1	534	0	0.1113	Up
CL2876.Contig9	535	0	0.1111	Up
CL8338.Contig5	539	0	0.1103	Up
CL5799.Contig1	548	0	0.1085	Up
Unigene30358	548	0	0.1085	Up
CL4649.Contig6	1100	0	0.1081	Up
CL2791.Contig9	551	0	0.1079	Up
CL3708.Contig3	563	0	0.1056	Up
Unigene29983	1142	0	0.1041	Up
CL4649.Contig4	1143	0	0.104	Up
CL5732.Contig2	1149	0	0.1035	Up
CL1033.Contig2	1154	0	0.103	Up
CL6221.Contig3	577	0	0.103	Up
CL611.Contig5	578	0	0.1028	Up
CL4649.Contig5	1156	0	0.1028	Up
CL1644.Contig3	580	0	0.1025	Up
CL2542.Contig4	580	0	0.1025	Up
CL4773.Contig17	582	0	0.1021	Up
CL6800.Contig2	584	0	0.1018	Up
CL4649.Contig7	1177	0	0.101	Up
CL8663.Contig1	1199	0	0.0991	Up
CL1953.Contig7	606	0	0.0981	Up
CL3911.Contig1	1218	0	0.0976	Up
Unigene4884	612	0	0.0971	Up
CL233.Contig4	618	0	0.0962	Up
CL7880.Contig1	618	0	0.0962	Up
Unigene22393	624	0	0.0953	Up
CL5294.Contig5	628	0	0.0946	Up
CL3089.Contig2	630	0	0.0943	Up
CL1770.Contig2	632	0	0.094	Up
CL3153.Contig3	1900	0	0.0938	Up
CL3911.Contig5	1272	0	0.0935	Up
Unigene12469	643	0	0.0924	Up
CL8545.Contig1	646	0	0.092	Up
CL3758.Contig1	653	0	0.091	Up
CL11391.Contig1	1309	0	0.0908	Up
CL1359.Contig8	659	0	0.0902	Up
CL1294.Contig5	661	0	0.0899	Up
CL1294.Contig3	676	0	0.0879	Up
Unigene22296	682	0	0.0871	Up
CL3346.Contig2	2053	0	0.0869	Up
CL1079.Contig2	688	0	0.0864	Up
CL815.Contig12	1384	0	0.0859	Up
CL11687.Contig5	693	0	0.0858	Up
CL3212.Contig1	701	0	0.0848	Up
CL7150.Contig5	701	0	0.0848	Up
CL90.Contig4	702	0	0.0847	Up
CL233.Contig3	703	0	0.0845	Up
Unigene22755	703	0	0.0845	Up
CL333.Contig2	707	0	0.0841	Up
CL2622.Contig2	734	0	0.081	Up
CL142.Contig7	734	0	0.081	Up
CL7571.Contig7	745	0	0.0798	Up
CL5199.Contig3	1520	0	0.0782	Up
CL4877.Contig3	1523	0	0.0781	Up
CL2725.Contig8	761	0	0.0781	Up
Unigene33241	764	0	0.0778	Up
CL9484.Contig2	765	0	0.0777	Up
CL7672.Contig3	766	0	0.0776	Up
CL3911.Contig15	768	0	0.0774	Up
CL3277.Contig6	770	0	0.0772	Up
CL7571.Contig9	771	0	0.0771	Up
Unigene21784	780	0	0.0762	Up
CL4510.Contig5	1574	0	0.0755	Up
CL4849.Contig4	794	0	0.0749	Up
CL2741.Contig3	798	0	0.0745	Up
CL4863.Contig14	801	0	0.0742	Up
CL333.Contig3	803	0	0.074	Up
CL2264.Contig1	807	0	0.0737	Up
Unigene17229	806	0	0.0737	Up
CL591.Contig1	806	0	0.0737	Up
CL3277.Contig2	813	0	0.0731	Up
CL9.Contig7	819	0	0.0726	Up
CL3358.Contig9	1646	0	0.0722	Up
CL8544.Contig4	2483	0	0.0718	Up
CL10387.Contig1	831	0	0.0715	Up
CL2994.Contig1	835	0	0.0712	Up
CL3089.Contig1	842	0	0.0706	Up
CL3277.Contig3	844	0	0.0704	Up
CL4484.Contig2	845	0	0.0703	Up
CL3358.Contig10	1694	0	0.0702	Up
CL4515.Contig1	849	0	0.07	Up
CL2725.Contig5	851	0	0.0698	Up
Unigene21785	876	0	0.0678	Up
CL4849.Contig3	879	0	0.0676	Up
CL4863.Contig11	882	0	0.0674	Up
CL3820.Contig8	887	0	0.067	Up
CL7571.Contig4	895	0	0.0664	Up
Unigene1182	2698	0	0.0661	Up
CL8026.Contig3	1817	0	0.0654	Up
CL3159.Contig1	910	0	0.0653	Up
CL733.Contig2	919	0	0.0647	Up
CL1465.Contig3	952	0	0.0624	Up
Unigene17231	965	0	0.0616	Up
CL4934.Contig3	1013	0	0.0587	Up
CL4340.Contig5	1012	0	0.0587	Up
CL6515.Contig1	1018	0	0.0584	Up
CL2305.Contig5	2037	0	0.0584	Up
CL565.Contig22	1019	0	0.0583	Up
CL837.Contig4	1019	0	0.0583	Up
CL5705.Contig2	1051	0	0.0566	Up
CL3520.Contig4	1052	0	0.0565	Up
CL7045.Contig2	1073	0	0.0554	Up
CL2324.Contig1	1078	0	0.0551	Up
CL6814.Contig1	1094	0	0.0543	Up
CL3623.Contig8	1096	0	0.0542	Up
CL565.Contig18	1116	0	0.0533	Up
Unigene32595	256	0.4539	23.9138	Up
CL11559.Contig4	1130	0	0.0526	Up
Unigene21715	2334	0	0.0509	Up
CL2324.Contig2	1171	0	0.0508	Up
CL5732.Contig4	1185	0	0.0502	Up
Unigene32153	520	0.2235	11.0871	Up
CL7658.Contig3	1200	0	0.0495	Up
CL7150.Contig4	1211	0	0.0491	Up
CL74.Contig2	1213	0	0.049	Up
Unigene29727	1222	0	0.0486	Up
CL815.Contig11	1260	0	0.0472	Up
Unigene31888	465	0.1249	5.8797	Up
Unigene33799	296	0.3926	18.2726	Up
CL2261.Contig2	1281	0	0.0464	Up
CL1166.Contig1	1318	0	0.0451	Up
Unigene32322	426	0.1364	6.1389	Up
CL786.Contig18	1320	0	0.045	Up
CL2069.Contig5	1322	0	0.045	Up
CL3139.Contig4	1334	0	0.0446	Up
Unigene22301	1341	0	0.0443	Up
Unigene31767	320	0.1816	7.9867	Up
CL3623.Contig3	1356	0	0.0438	Up
Unigene32487	386	0.1505	6.4672	Up
CL3087.Contig3	1384	0	0.0429	Up
CL786.Contig12	1399	0	0.0425	Up
Unigene9563	1407	0	0.0422	Up
CL359.Contig2	1413	0	0.0421	Up
CL3623.Contig4	1421	0	0.0418	Up
CL4538.Contig1	1430	0	0.0416	Up
CL4618.Contig4	1433	0	0.0415	Up
Unigene31936	413	0.2813	11.657	Up
CL3979.Contig1	1458	0	0.0408	Up
CL3623.Contig1	1460	0	0.0407	Up
CL3139.Contig5	1464	0	0.0406	Up
Unigene31961	416	0.1397	5.5721	Up
CL3623.Contig2	1525	0	0.039	Up
CL786.Contig16	1526	0	0.0389	Up
Unigene32533	358	0.1623	6.3089	Up
CL4538.Contig2	1553	0	0.0383	Up
CL2190.Contig2	1567	0	0.0379	Up
CL7658.Contig1	1591	0	0.0374	Up
CL793.Contig3	1603	0	0.0371	Up
CL786.Contig9	1624	0	0.0366	Up
CL4749.Contig4	1659	0	0.0358	Up
CL3153.Contig5	1663	0	0.0357	Up
CL1221.Contig11	1698	0	0.035	Up
CL5983.Contig3	1703	0	0.0349	Up
CL4356.Contig4	1724	0	0.0345	Up
Unigene10847	1729	0	0.0344	Up
CL1407.Contig4	1767	0	0.0336	Up
Unigene31933	212	0.5481	18.2234	Up
Unigene31749	790	0.1471	4.8903	Up
CL5983.Contig1	1793	0	0.0331	Up
CL5983.Contig4	1883	0	0.0316	Up
Unigene31902	308	0.1886	5.7892	Up
Unigene33760	310	0.1874	5.7519	Up
Unigene31989	364	0.1596	4.8986	Up
CL1005.Contig1	1968	0	0.0302	Up
Unigene30030	203	0.8586	25.7654	Up
Unigene33943	279	0.2082	6.178	Up
Unigene33329	328	0.1771	5.255	Up
Unigene33998	464	0.1252	3.7148	Up
CL7800.Contig1	431	0.1348	3.9992	Up
CL6385.Contig2	206	0.8461	24.5246	Up
Unigene1850	2063	0	0.0288	Up
CL10170.Contig3	2070	0	0.0287	Up
Unigene31389	310	0.1874	5.3684	Up
CL3906.Contig1	807	0.072	1.9886	Up
Unigene31781	289	0.201	5.3472	Up
Unigene32889	280	0.2075	5.5191	Up
Unigene33076	652	0.6237	16.4088	Up
CL4268.Contig1	366	1.4286	37.3506	Up
Unigene32937	250	2.5563	66.5685	Up
Unigene17099	1290	0.1801	4.6535	Up
Unigene31706	312	0.1862	4.7625	Up
Unigene32018	311	0.1868	4.7778	Up
Unigene10787	472	1.6001	40.2957	Up
Unigene33788	392	2.2231	55.1908	Up
CL8910.Contig2	599	0.097	2.3814	Up
Unigene33990	270	0.2152	5.2832	Up
Unigene31897	213	0.2728	6.697	Up
Unigene32842	1122	0.4142	9.906	Up
CL6193.Contig4	5452	0.0959	2.2894	Up
Unigene31956	329	0.5298	12.646	Up
Unigene31763	271	0.2144	5.0444	Up
Unigene34323	270	0.2152	5.0631	Up
CL971.Contig2	2566	0	0.0232	Up
Unigene34460	366	0.1587	3.5727	Up
Unigene34014	257	0.2261	5.0879	Up
Unigene31654	479	0.3639	8.0655	Up
CL10889.Contig2	265	0.2192	4.71	Up
Unigene33706	319	0.3642	7.8255	Up
Unigene32797	376	0.1545	3.3196	Up
CL7158.Contig1	1577	0.7368	15.6788	Up
Unigene30750	333	0.3489	7.318	Up
Unigene29932	483	0.9623	20.1812	Up
CL8977.Contig1	2078	99.8676	2052.69	Up
CL6385.Contig1	258	49.3154	1012.49	Up
Unigene30508	956	1.0331	21.2006	Up
Unigene31764	331	0.351	7.1826	Up
CL9293.Contig1	487	0.1193	2.4409	Up
Unigene7358	250	0.2324	4.7549	Up
Unigene29831	214	0.2715	5.5548	Up
Unigene34168	258	0.2252	4.6075	Up
Unigene34424	329	0.1766	3.6131	Up
Unigene32592	207	0.2807	5.7426	Up
Unigene34279	327	0.1777	3.6352	Up
CL7764.Contig1	687	0.1691	3.3741	Up
Unigene31935	307	2.2709	44.5287	Up
Unigene23026	203	8.2997	162.498	Up
Unigene34163	277	0.2097	4.0769	Up
Unigene32351	224	0.2594	5.0415	Up
Unigene14332	1196	0.4858	9.3925	Up
CL2506.Contig2	2739	21.084	405.334	Up
Unigene32543	304	0.5733	10.9488	Up
Unigene31772	304	0.5733	10.9488	Up
CL4521.Contig2	622	0.2802	5.3512	Up
Unigene11401	1899	8.3521	159.091	Up
Unigene12226	840	14.8702	283.171	Up
Unigene2218	1882	2.3461	44.5298	Up
Unigene12278	997	3.9625	75.1746	Up
Unigene32234	451	0.2576	4.8761	Up
CL2160.Contig1	1782	40.1337	744.12	Up
CL3895.Contig1	2973	31.8726	587.825	Up
Unigene33725	223	0.2605	4.7975	Up
CL2303.Contig4	316	0.3677	6.7712	Up
Unigene32154	288	0.4035	7.4295	Up
CL1431.Contig3	343	1.5244	27.8986	Up
Unigene31707	394	0.2949	5.2799	Up
Unigene31371	320	0.3631	6.5008	Up
CL6385.Contig3	849	41.0584	735.077	Up
CL6172.Contig3	740	0.2355	4.1766	Up
Unigene4384	2050	112.058	1966.09	Up
Unigene34079	227	0.2559	4.4512	Up
Unigene33921	390	0.2979	5.1816	Up
Unigene30704	264	0.4401	7.6547	Up
Unigene31436	353	0.1646	2.8624	Up
Unigene34059	236	0.2462	4.2814	Up
CL2273.Contig3	216	0.269	4.6778	Up
CL2961.Contig1	1301	3.0366	52.4007	Up
Unigene32591	375	0.6197	10.6193	Up
Unigene31679	408	0.4272	7.2838	Up
CL6977.Contig7	498	0.35	5.9675	Up
Unigene6449	1521	7.1046	121.022	Up
Unigene18674	620	16.2111	275.995	Up
Unigene32277	260	0.4469	7.5438	Up
Unigene31922	322	0.3609	6.0913	Up
Unigene32639	662	1.4042	23.6129	Up
CL10151.Contig1	1454	1.7182	28.6144	Up
CL1606.Contig1	1555	1.2329	20.258	Up
CL9715.Contig1	442	0.1314	2.1515	Up
CL2273.Contig4	206	0.282	4.6164	Up
Unigene33946	206	0.282	4.6164	Up
Unigene31673	313	0.5568	9.1148	Up
Unigene32915	228	1.0193	16.6838	Up
Unigene31503	221	0.2629	4.3031	Up
Unigene32925	274	0.4241	6.9415	Up
Unigene33873	255	0.4557	7.4587	Up
Unigene31451	268	0.2168	3.5484	Up
Unigene31163	359	0.3237	5.2979	Up
Unigene34263	325	0.1788	2.9261	Up
Unigene34244	316	0.1839	3.0094	Up
Unigene12425	759	21.203	346.124	Up
Unigene21186	803	2.3876	38.6372	Up
CL2961.Contig2	1387	1.7593	28.454	Up
CL6805.Contig4	2133	0.2724	4.4027	Up
Unigene32488	753	0.7715	12.3924	Up
Unigene32354	635	0.549	8.7984	Up
Unigene31662	257	0.4521	7.1693	Up
CL4368.Contig1	2458	0.0236	0.3627	Up
CL2044.Contig4	1187	0.0489	0.7511	Up
CL6221.Contig4	468	0.1241	1.905	Up
Unigene32333	205	0.2834	4.349	Up
CL11391.Contig2	1238	0.3285	5.041	Up
Unigene32050	200	0.2905	4.4577	Up
Unigene31129	221	0.2629	4.0341	Up
Unigene34366	285	0.2039	3.1282	Up
CL8171.Contig4	1206	0.0482	0.7393	Up
Unigene32256	339	0.6855	10.169	Up
Unigene31770	250	0.4648	6.8946	Up
Unigene32540	383	0.3034	4.5004	Up
CL3051.Contig3	1499	2.2867	33.7823	Up
Unigene8191	1009	47.503	696.211	Up
CL6385.Contig5	1232	93.4655	1369.16	Up
CL6193.Contig5	5547	0.6284	9.097	Up
Unigene32926	549	7.5135	107.938	Up
Unigene31461	295	0.1969	2.8207	Up
Unigene34547	299	0.1943	2.783	Up
Unigene31751	218	0.533	7.634	Up
CL1019.Contig1	218	0.2665	3.817	Up
Unigene33919	203	0.2862	4.099	Up
Unigene34857	261	0.2226	3.1881	Up
Unigene31958	256	0.4539	6.5008	Up
Unigene31442	219	0.2653	3.7996	Up
Unigene33815	770	0.6791	9.7259	Up
CL10017.Contig2	293	0.1983	2.84	Up
Unigene34797	329	0.1766	2.5292	Up
Unigene34655	268	0.2168	3.1049	Up
Unigene34662	240	0.2421	3.4671	Up
Unigene32756	355	0.1637	2.344	Up
Unigene11105	1688	3.786	53.8024	Up
Unigene23025	245	11.3824	160.114	Up
Unigene32517	252	0.6916	9.6702	Up
Unigene31123	399	0.2912	4.022	Up
Unigene32662	566	0.6159	8.5059	Up
Unigene17427	906	5.9637	81.6756	Up
Unigene33853	267	0.6528	8.9043	Up
CL2305.Contig4	2070	0.3087	4.1921	Up
CL773.Contig2	1899	2.8452	38.4348	Up
Unigene33794	424	1.6443	22.1484	Up
Unigene17185	361	2.575	34.5751	Up
CL2213.Contig1	1963	4.1731	55.6817	Up
CL6805.Contig3	2110	0.0275	0.3662	Up
CL1320.Contig3	766	0.0758	1.0087	Up
Unigene34972	303	0.1917	2.5501	Up
Unigene34805	288	0.2017	2.6829	Up
Unigene34931	232	0.2504	3.3305	Up
Unigene32439	324	0.1793	2.3848	Up
Unigene31577	215	0.2702	3.5938	Up
Unigene34580	311	0.1868	2.4845	Up
CL2930.Contig1	207	0.5613	7.4654	Up
Unigene20128	657	2.2991	30.5775	Up
Unigene33274	261	0.6678	8.8813	Up
Unigene34418	272	0.2136	2.8407	Up
CL111.Contig27	283	0.2053	2.7303	Up
Unigene34509	219	0.2653	3.5282	Up
Unigene33926	361	0.3219	4.2807	Up
Unigene34657	264	0.2201	2.9268	Up
Unigene34504	257	0.2261	3.0065	Up
CL7764.Contig2	803	0.2171	2.8867	Up
CL397.Contig15	1706	0.0341	0.4529	Up
Unigene32248	742	0.783	10.3332	Up
CL6385.Contig4	1007	94.0986	1225.97	Up
Unigene20931	1089	132.147	1700.73	Up
CL4880.Contig2	539	0.9701	12.4606	Up
Unigene32999	201	0.5781	7.3926	Up
Unigene31169	256	0.4539	5.8043	Up
Unigene34013	295	0.3939	5.037	Up
Unigene34022	286	0.4063	5.1955	Up
Unigene32296	359	0.3237	4.139	Up
Unigene12002	231	8.8027	111.153	Up
CL8358.Contig1	313	0.5568	7.026	Up
Unigene33884	332	0.525	6.6239	Up
Unigene32360	487	1.0737	13.425	Up
Unigene33834	354	0.8206	10.2418	Up
CL4521.Contig1	936	0.4345	5.3975	Up
CL6385.Contig6	841	32.2611	400.081	Up
CL424.Contig3	498	2.0999	26.0183	Up
CL6819.Contig2	1520	0.0382	0.4692	Up
Unigene31507	211	0.2753	3.3803	Up
Unigene32224	297	0.3912	4.8029	Up
Unigene34076	624	0.3724	4.572	Up
Unigene32438	231	0.2515	3.0876	Up
CL9563.Contig1	222	0.2617	3.2128	Up
Unigene31786	203	0.2862	3.5135	Up
Unigene33887	257	0.6782	8.3257	Up
Unigene34496	200	0.2905	3.5662	Up
Unigene30565	227	0.5119	6.284	Up
Unigene32632	221	0.2629	3.2273	Up
CL457.Contig2	258	0.2252	2.7645	Up
Unigene34755	236	0.2462	3.0222	Up
Unigene34771	293	0.1983	2.4342	Up
Unigene34785	216	0.269	3.302	Up
Unigene32330	207	0.2807	3.4456	Up
CL7860.Contig3	242	0.2401	2.9472	Up
Unigene31539	264	0.2201	2.7016	Up
Unigene15754	1781	36.7636	450.56	Up
Unigene13822	587	2.6723	32.6038	Up
CL1431.Contig1	1859	4.8753	59.4042	Up
Unigene33806	744	1.0932	13.2613	Up
CL9188.Contig1	571	0.5087	6.1414	Up
CL2729.Contig1	438	0.3979	4.7495	Up
Unigene33807	259	1.3459	16.0638	Up
CL6762.Contig1	778	84.3835	997.734	Up
Unigene31191	250	0.4648	5.4681	Up
Unigene32859	217	0.5355	6.2997	Up
Unigene33738	342	0.3398	3.9972	Up
Unigene31357	372	0.3124	3.6748	Up
CL4241.Contig2	1621	2.3296	27.3531	Up
Unigene31814	670	0.9538	11.1776	Up
Unigene32289	237	1.2257	14.2948	Up
Unigene33937	296	0.5888	6.8271	Up
Unigene31689	461	0.7562	8.7672	Up
Unigene16345	1883	15.7046	180.581	Up
CL589.Contig3	720	0.4035	4.6228	Up
CL3483.Contig4	4694	0.4456	5.1029	Up
Unigene20700	555	8.4791	97.0256	Up
Unigene10661	640	9.2593	105.871	Up
CL7630.Contig1	845	4.0565	45.9312	Up
CL2303.Contig1	443	0.1311	1.4758	Up
CL7591.Contig2	357	0.1627	1.8314	Up
Unigene35058	252	0.2305	2.5944	Up
Unigene34910	279	0.2082	2.3434	Up
Unigene35083	265	0.2192	2.4672	Up
Unigene34732	289	0.201	2.2623	Up
Unigene31195	284	0.4091	4.6042	Up
Unigene34998	297	0.1956	2.2013	Up
CL11594.Contig1	312	0.1862	2.0955	Up
Unigene31245	202	0.2876	3.2366	Up
CL9645.Contig1	263	1.3254	14.9155	Up
CL1854.Contig8	230	0.2526	2.8426	Up
Unigene32179	529	0.7688	8.6514	Up
Unigene33854	259	0.8973	10.0973	Up
Unigene34175	278	0.418	4.7036	Up
Unigene34979	270	0.2152	2.4215	Up
Unigene34993	269	0.216	2.4305	Up
Unigene32736	236	0.2462	2.7703	Up
Unigene34757	236	0.2462	2.7703	Up
Unigene31868	236	0.2462	2.7703	Up
Unigene31502	226	0.2571	2.8929	Up
Unigene29494	242	0.2401	2.7016	Up
CL10333.Contig2	248	0.2343	2.6363	Up
Unigene34708	224	0.2594	2.9187	Up
Unigene34693	210	0.2767	3.1133	Up
CL397.Contig13	1736	0.0335	0.3766	Up
CL5406.Contig1	718	6.2305	69.9493	Up
CL5842.Contig2	1088	0.9078	10.1063	Up
CL424.Contig1	296	39.0589	433.523	Up
Unigene17549	1147	13.6253	150.637	Up
Unigene32479	419	1.3866	15.3201	Up
Unigene26872	494	2.8226	30.9213	Up
Unigene31924	339	0.5141	5.6105	Up
CL5277.Contig1	366	0.4762	5.1966	Up
Unigene2548	511	3.1834	34.5451	Up
Unigene31745	400	0.7262	7.8753	Up
Unigene33915	834	0.4876	5.2737	Up
CL8506.Contig2	682	0.9371	10.1094	Up
Unigene32339	236	3.2003	34.5032	Up
CL5895.Contig2	319	0.3642	3.9127	Up
Unigene33831	650	0.715	7.681	Up
Unigene34189	311	0.3736	4.0134	Up
Unigene31780	231	0.503	5.4033	Up
CL4371.Contig5	1497	0.2717	2.8984	Up
Unigene4848	956	1.8231	19.3976	Up
CL3490.Contig2	466	0.6234	6.6324	Up
CL1402.Contig9	1844	3.1821	33.8438	Up
Unigene17584	1081	97.6535	1034.61	Up
Unigene33547	317	0.5498	5.8124	Up
CL9519.Contig3	1576	1.2165	12.8602	Up
Unigene33904	250	0.6972	7.3701	Up
Unigene7319	319	6.3743	67.0753	Up
Unigene2262	627	14.5476	152.43	Up
CL3483.Contig5	4342	0.281	2.9431	Up
Unigene12755	612	9.3032	97.4093	Up
Unigene7308	323	27.6998	290.005	Up
Unigene13528	1569	21.3284	222.062	Up
CL2858.Contig1	265	2.6308	27.3631	Up
CL9783.Contig1	233	1.7454	18.1115	Up
Unigene32878	1521	0.573	5.9397	Up
Unigene33246	305	2.6668	27.4771	Up
CL10622.Contig1	1046	3.3881	34.7753	Up
CL8445.Contig1	578	8.1417	83.4986	Up
CL1992.Contig2	872	0.0666	0.6816	Up
Unigene34891	254	0.2287	2.34	Up
Unigene31198	217	0.2677	2.739	Up
Unigene34275	304	0.3822	3.9103	Up
Unigene32430	228	0.5096	5.2137	Up
Unigene32912	312	0.1862	1.905	Up
Unigene31426	222	0.2617	2.6773	Up
Unigene34822	222	0.2617	2.6773	Up
Unigene34988	276	0.2105	2.1535	Up
Unigene31887	690	0.421	4.307	Up
Unigene31761	278	1.4629	14.9659	Up
Unigene31267	203	0.2862	2.9279	Up
CL8550.Contig1	350	0.332	3.3964	Up
CL4250.Contig5	406	0.1431	1.4639	Up
Unigene34111	293	0.3966	4.0571	Up
Unigene32014	216	0.269	2.7517	Up
Unigene29901	246	0.2362	2.4161	Up
CL8089.Contig4	224	0.2594	2.6534	Up
Unigene35011	224	0.2594	2.6534	Up
Unigene31475	224	0.2594	2.6534	Up
Unigene35028	210	0.2767	2.8303	Up
CL4926.Contig3	512	0.1135	1.1609	Up
CL3490.Contig1	579	2.5085	25.458	Up
Unigene7120	1873	53.8171	545.271	Up
Unigene10481	382	13.6879	138.633	Up
Unigene33920	772	0.602	6.0822	Up
CL5406.Contig3	356	2.6111	26.379	Up
Unigene2263	566	32.8467	331.414	Up
Unigene31937	503	0.5775	5.79	Up
Unigene33839	354	0.8206	8.227	Up
CL10692.Contig2	242	1.2004	12.0346	Up
Unigene33902	364	0.6384	6.3682	Up
Unigene16111	835	1.1828	11.7449	Up
CL111.Contig26	266	2.1841	21.6741	Up
Unigene31240	414	0.421	4.1634	Up
CL5731.Contig2	446	0.3908	3.8647	Up
Unigene33198	221	0.7887	7.7993	Up
Unigene32470	293	0.5949	5.8828	Up
CL5195.Contig3	839	1.3849	13.6724	Up
CL858.Contig6	1625	73.0779	720.001	Up
Unigene32174	390	0.7448	7.3152	Up
Unigene31886	229	1.7759	17.3896	Up
Unigene30566	320	1.2709	12.4445	Up
CL2506.Contig1	1479	95.4938	931.087	Up
Unigene34093	259	0.4486	4.3602	Up
Unigene34330	299	0.3886	3.7769	Up
CL9279.Contig2	316	0.3677	3.5737	Up
CL2195.Contig3	261	0.4452	4.3268	Up
Unigene34512	334	0.3479	3.3811	Up
Unigene33965	334	0.6958	6.7622	Up
Unigene31182	283	0.4106	3.9904	Up
Unigene31590	290	0.4007	3.8941	Up
Unigene31181	209	0.556	5.4033	Up
CL1356.Contig2	650	0.1788	1.7374	Up
CL4259.Contig1	268	1.5175	14.6373	Up
CL9293.Contig2	469	0.6194	5.9563	Up
CL10613.Contig2	504	0.5764	5.5427	Up
CL10103.Contig3	666	0.4362	4.1944	Up
CL424.Contig2	534	23.9354	230.065	Up
Unigene29923	244	0.7143	6.8205	Up
CL8777.Contig1	607	0.67	6.3647	Up
CL10388.Contig2	613	8.056	76.4041	Up
CL566.Contig6	705	0.412	3.8781	Up
Unigene31686	295	1.1816	11.0813	Up
CL1050.Contig3	246	2.3617	21.9866	Up
CL5895.Contig1	1215	6.8856	63.8878	Up
CL6425.Contig2	767	0.0757	0.6974	Up
CL8026.Contig4	1613	0.036	0.3316	Up
Unigene15146	1054	0.0551	0.5075	Up
CL1342.Contig6	1010	0.0575	0.5296	Up
CL1686.Contig3	286	0.2031	1.8704	Up
CL2847.Contig4	420	0.1383	1.2736	Up
Unigene35089	211	0.2753	2.5352	Up
Unigene31576	217	0.2677	2.4651	Up
Unigene32016	242	0.4801	4.4209	Up
Unigene31423	240	0.4841	4.4577	Up
CL3895.Contig2	297	0.1956	1.8011	Up
Unigene31274	241	0.4821	4.4392	Up
Unigene34982	208	0.2793	2.5718	Up
CL6574.Contig1	225	0.5164	4.7549	Up
CL10085.Contig1	440	0.3961	3.6472	Up
Unigene34913	238	0.2441	2.2476	Up
CL5020.Contig2	244	1.1905	10.9616	Up
Unigene32012	231	0.503	4.6314	Up
Unigene34909	204	0.2848	2.6222	Up
Unigene31406	261	0.4452	4.099	Up
Unigene32105	219	0.2653	2.4426	Up
Unigene31537	200	0.2905	2.6746	Up
Unigene31459	362	0.321	2.9554	Up
Unigene31046	209	0.278	2.5595	Up
CL1320.Contig2	758	0.1533	1.4114	Up
Unigene34927	220	0.2641	2.4315	Up
Unigene34784	243	0.2391	2.2013	Up
Unigene35004	207	0.2807	2.5842	Up
Unigene35033	207	0.2807	2.5842	Up
CL8341.Contig1	224	0.2594	2.3881	Up
CL8169.Contig1	241	0.2411	2.2196	Up
Unigene29648	325	0.1788	1.6459	Up
Unigene14420	1146	41.2666	378.971	Up
Unigene1442	647	21.3713	196.038	Up
CL4500.Contig1	965	8.5491	78.1601	Up
Unigene11889	1344	1.8588	16.8933	Up
CL2506.Contig3	863	1.885	17.0802	Up
CL5916.Contig2	1700	0.2051	1.853	Up
Unigene5876	565	5.5527	50.0737	Up
Unigene33859	355	0.8183	7.3667	Up
CL7025.Contig2	1247	5.2181	46.9007	Up
Unigene33803	314	1.6652	14.9537	Up
Unigene31670	460	1.1367	10.2075	Up
Unigene11628	481	3.382	30.2742	Up
Unigene32374	495	0.8216	7.3245	Up
CL6756.Contig2	1854	5.9226	52.7039	Up
CL9540.Contig4	1634	0.2133	1.8915	Up
Unigene31411	247	0.7056	6.2564	Up
Unigene33936	230	0.7578	6.7189	Up
Unigene32294	260	0.6704	5.9436	Up
Unigene32705	258	0.6756	5.9897	Up
CL2305.Contig3	574	1.1134	9.837	Up
Unigene30680	378	1.9981	17.6107	Up
Unigene16286	231	4.2756	37.5657	Up
CL4304.Contig1	1362	1.0237	8.9896	Up
CL589.Contig6	916	1.2051	10.5765	Up
CL1565.Contig2	1116	3.6962	32.4343	Up
Unigene31553	241	0.4821	4.1926	Up
Unigene31373	244	0.4762	4.141	Up
Unigene34227	260	0.4469	3.8862	Up
Unigene34922	378	0.3074	2.6731	Up
Unigene31949	230	0.5052	4.3931	Up
Unigene34218	237	0.4903	4.2634	Up
Unigene31518	303	0.3835	3.3347	Up
Unigene34408	279	0.4165	3.6216	Up
Unigene21820	287	0.4049	3.5206	Up
CL11565.Contig2	655	19.0702	164.879	Up
Unigene29695	901	0.7738	6.6627	Up
Unigene31699	288	2.0173	17.3356	Up
CL10622.Contig2	536	0.8671	7.4295	Up
Unigene34033	269	0.6479	5.5238	Up
CL4903.Contig1	1482	1.0585	9.0237	Up
CL589.Contig4	935	0.6214	5.2762	Up
CL940.Contig1	455	1.7876	15.153	Up
Unigene8547	558	8.5376	72.2182	Up
Unigene3363	662	1.6675	14.0959	Up
Unigene33898	242	0.9603	8.1049	Up
Unigene33957	324	0.7173	6.0537	Up
Unigene15397	854	19.1164	161.188	Up
CL6029.Contig2	332	5.4248	45.6513	Up
CL1484.Contig1	223	4.6895	39.4464	Up
Unigene3153	291	5.5902	46.9771	Up
Unigene33858	387	0.9007	7.5255	Up
Unigene20109	511	1.3643	11.3987	Up
Unigene33669	210	1.6599	13.8684	Up
CL6298.Contig1	476	5.0042	41.4555	Up
Unigene4862	726	6.0018	49.5302	Up
CL1644.Contig5	2269	0.0256	0.2096	Up
CL2548.Contig4	443	0.1311	1.0733	Up
Unigene30613	303	0.1917	1.5693	Up
Unigene34929	245	0.2371	1.9408	Up
CL2419.Contig1	351	0.1655	1.3547	Up
Unigene30454	515	0.1128	0.9233	Up
CL4546.Contig3	681	0.0853	0.6982	Up
Unigene32235	430	0.5404	4.4232	Up
Unigene30754	238	0.2441	1.9979	Up
Unigene34940	208	0.2793	2.286	Up
CL773.Contig3	308	0.9431	7.719	Up
Unigene33955	404	0.5752	4.7078	Up
CL2329.Contig4	655	0.3548	2.9038	Up
Unigene31843	292	0.5969	4.8852	Up
CL8514.Contig2	233	0.4987	4.0815	Up
Unigene32036	256	0.4539	3.7148	Up
Unigene33334	306	0.5696	4.6617	Up
Unigene31727	257	0.6782	5.5505	Up
CL9021.Contig1	283	0.2053	1.6802	Up
Unigene34222	272	0.4272	3.4962	Up
CL3093.Contig1	214	0.2715	2.2219	Up
Unigene33144	214	0.543	4.4438	Up
Unigene31097	558	0.4165	3.4085	Up
CL3688.Contig6	599	0.194	1.5876	Up
CL5195.Contig2	735	0.1581	1.2938	Up
Unigene34928	248	0.2343	1.9173	Up
CL1282.Contig10	782	0.0743	0.608	Up
CL6593.Contig3	349	0.1665	1.3624	Up
CL4368.Contig5	512	0.1135	0.9287	Up
CL397.Contig1	1751	0.0332	0.2716	Up
Unigene33262	1140	0.051	0.4171	Up
Unigene21502	468	8.0691	65.9132	Up
CL589.Contig9	1463	0.8736	7.1096	Up
CL11025.Contig1	1657	107.219	872.281	Up
CL4046.Contig1	1042	1.0036	8.1568	Up
CL8205.Contig2	2153	1.9429	15.7908	Up
Unigene33805	481	1.691	13.716	Up
CL589.Contig7	1666	2.1621	17.5169	Up
CL3051.Contig4	682	4.4297	35.8186	Up
CL788.Contig2	1493	1.0117	8.161	Up
Unigene32246	887	1.048	8.443	Up
Unigene4982	2618	58.7634	471.426	Up
Unigene30019	782	0.4458	3.5723	Up
Unigene30753	1000	0.2905	2.318	Up
Unigene16132	2931	35.7585	284.811	Up
Unigene31661	324	1.6138	12.8412	Up
CL204.Contig4	914	0.2543	2.0159	Up
Unigene17217	1387	141.453	1118.32	Up
Unigene33863	488	0.8334	6.577	Up
CL7538.Contig2	301	5.5974	44.0341	Up
Unigene17587	1140	12.5878	98.7475	Up
Unigene29671	360	0.4841	3.7973	Up
CL8792.Contig3	653	1.3346	10.4673	Up
CL4912.Contig1	429	0.4063	3.1866	Up
CL7917.Contig3	516	0.3378	2.6493	Up
Unigene33972	243	0.7173	5.6256	Up
CL9645.Contig3	797	1.2392	9.6947	Up
Unigene594	2207	28.009	217.951	Up
Unigene31375	495	0.5868	4.5628	Up
Unigene34320	671	0.4329	3.366	Up
Unigene31759	385	0.7545	5.8664	Up
CL3692.Contig4	1658	3.7494	29.0728	Up
CL10841.Contig2	1558	2.6849	20.7912	Up
Unigene11797	256	9.9855	77.0813	Up
Unigene5140	937	1.6121	12.4328	Up
Unigene1572	1023	14.1411	108.937	Up
Unigene17245	696	0.1669	1.281	Up
CL4639.Contig1	242	0.4801	3.6841	Up
Unigene34475	259	0.4486	3.4423	Up
Unigene31342	215	0.5404	4.1467	Up
Unigene31429	215	0.5404	4.1467	Up
Unigene31522	241	0.4821	3.6993	Up
Unigene33360	228	0.5096	3.9103	Up
CL2334.Contig2	389	0.2987	2.2919	Up
Unigene30470	646	0.5396	4.1403	Up
Unigene32038	291	0.3993	3.0637	Up
Unigene31386	223	0.5211	3.998	Up
CL6263.Contig1	1347	0.0863	0.6619	Up
CL6746.Contig3	2237	3.6619	28.0309	Up
Unigene31720	682	1.1074	8.4535	Up
Unigene3810	970	6.6483	50.7352	Up
CL4374.Contig1	1402	0.4558	3.4763	Up
Unigene32723	328	3.8968	29.7181	Up
Unigene31859	480	0.8473	6.4389	Up
Unigene3558	491	1.1833	8.9578	Up
CL4500.Contig2	1371	52.8854	399.449	Up
Unigene33022	983	0.4728	3.5674	Up
Unigene31848	638	0.7285	5.4965	Up
CL2213.Contig4	2018	1.5546	11.6634	Up
Unigene30918	329	1.0595	7.9489	Up
Unigene32413	367	0.4749	3.5629	Up
CL9020.Contig2	1511	0.2307	1.7308	Up
Unigene33851	506	1.0334	7.7525	Up
Unigene31607	281	0.6203	4.6534	Up
CL5066.Contig2	568	0.3069	2.3021	Up
CL589.Contig8	1475	0.7484	5.6011	Up
CL10388.Contig1	632	15.8114	118.308	Up
Unigene1434	1088	52.8112	392.836	Up
Unigene12046	356	1.9583	14.5251	Up
Unigene32569	206	1.1281	8.3672	Up
Unigene32304	539	1.4012	10.3655	Up
CL838.Contig1	1647	0.6349	4.6914	Up
CL702.Contig5	239	1.2154	8.9527	Up
Unigene32985	283	1.0265	7.5608	Up
Unigene19843	301	1.1581	8.4909	Up
Unigene33063	259	1.3459	9.8678	Up
Unigene30590	1481	1.2161	8.8693	Up
Unigene31651	285	1.6308	11.8872	Up
Unigene9072	544	10.2525	74.4045	Up
CL2273.Contig2	637	1.0945	7.931	Up
Unigene32080	849	0.8896	6.4407	Up
Unigene31114	624	1.5828	11.43	Up
Unigene2103	330	22.887	164.26	Up
CL397.Contig11	1733	0.0335	0.2401	Up
CL4472.Contig3	1154	0.0503	0.3605	Up
CL6669.Contig2	1843	0.063	0.4515	Up
CL3623.Contig9	1157	0.0502	0.3596	Up
Unigene18848	946	0.0614	0.4398	Up
CL11010.Contig2	315	0.1844	1.3208	Up
Unigene29722	253	0.2296	1.6445	Up
Unigene35124	212	0.274	1.9625	Up
CL2579.Contig3	628	0.0925	0.6625	Up
Unigene32233	353	0.4937	3.5359	Up
Unigene34614	249	0.4666	3.3418	Up
CL4250.Contig4	705	0.1648	1.1803	Up
Unigene34633	215	0.5404	3.8703	Up
CL1057.Contig6	396	0.2934	2.1013	Up
Unigene27207	667	0.0871	0.6238	Up
Unigene35071	235	0.2472	1.7704	Up
CL11551.Contig1	396	0.4401	3.1519	Up
Unigene35046	310	0.3748	2.6842	Up
Unigene21837	273	0.2128	1.524	Up
Unigene32614	263	0.2209	1.582	Up
Unigene32528	268	0.8671	6.2098	Up
Unigene31828	202	0.8628	6.179	Up
Unigene33819	385	1.509	10.8066	Up
Unigene34425	238	0.4882	3.4962	Up
CL6976.Contig1	414	2.8066	20.0992	Up
Unigene31221	361	0.4828	3.4575	Up
CL11391.Contig3	1360	1.1107	7.954	Up
Unigene34068	306	0.5696	4.079	Up
CL1927.Contig5	836	0.0695	0.4977	Up
Unigene32618	768	0.7565	5.4174	Up
CL7079.Contig1	384	1.6643	11.9182	Up
Unigene32924	223	0.7816	5.5971	Up
Unigene31291	261	0.4452	3.1881	Up
Unigene30652	283	0.8212	5.8806	Up
Unigene31437	283	0.4106	2.9403	Up
Unigene31823	398	0.7299	5.2268	Up
Unigene31970	250	0.4648	3.3284	Up
Unigene32017	237	0.4903	3.511	Up
Unigene31864	279	0.4165	2.9825	Up
CL6977.Contig6	209	0.556	3.9814	Up
CL1374.Contig9	278	0.209	1.4966	Up
Unigene34574	271	0.4288	3.0705	Up
CL5358.Contig2	216	0.269	1.9262	Up
CL8126.Contig4	268	0.2168	1.5524	Up
Unigene31965	389	0.4481	3.2086	Up
CL7088.Contig5	1233	0.1885	1.3497	Up
CL8643.Contig1	822	0.0707	0.5061	Up
CL1522.Contig4	1598	0.0364	0.2604	Up
Unigene3425	681	2.1328	15.1863	Up
Unigene31885	799	1.6724	11.9021	Up
CL3495.Contig4	512	4.6524	33.0846	Up
Unigene3901	888	3.1404	22.2886	Up
CL589.Contig1	735	0.7904	5.5797	Up
Unigene20748	278	9.6133	67.7744	Up
Unigene33971	485	0.8385	5.8823	Up
CL9762.Contig1	444	0.916	6.4255	Up
CL6647.Contig1	1892	2789.49	19547.1	Up
Unigene31687	304	1.1467	8.0161	Up
CL7088.Contig2	1988	7.4814	52.2907	Up
Unigene29822	369	0.7872	5.4765	Up
Unigene33860	262	1.1087	7.7131	Up
Unigene4786	588	2.8654	19.9131	Up
CL589.Contig2	688	1.52	10.5396	Up
CL11565.Contig1	359	10.5191	72.681	Up
Unigene32758	218	1.066	7.3614	Up
Unigene31676	203	2.2896	15.8106	Up
Unigene33811	318	1.4616	10.0929	Up
Unigene30919	275	0.8451	5.8356	Up
CL651.Contig4	782	13.0757	90.1424	Up
Unigene4537	1593	3.8294	26.3788	Up
CL589.Contig5	957	3.5818	24.5943	Up
CL11180.Contig2	367	1.583	10.8507	Up
CL156.Contig2	448	1.2968	8.8889	Up
CL9158.Contig2	1998	9.3631	64.0471	Up
Unigene31996	326	0.5346	3.6464	Up
Unigene34083	247	0.7056	4.8126	Up
Unigene34053	240	0.7262	4.953	Up
Unigene31782	245	1.4228	9.7039	Up
Unigene31250	215	0.8107	5.5289	Up
Unigene19284	1240	0.1406	0.9586	Up
Unigene4665	1098	10.7941	73.5645	Up
Unigene16962	1003	4.0547	27.6144	Up
Unigene32700	455	1.0215	6.9233	Up
CL5895.Contig3	264	4.8415	32.6449	Up
Unigene32490	669	1.0421	7.0186	Up
Unigene11084	1364	6.0909	41.004	Up
Unigene32830	322	1.263	8.4909	Up
Unigene15571	792	7.9224	53.1324	Up
CL3792.Contig3	3621	16.9913	113.636	Up
Unigene5065	1539	1.0193	6.7971	Up
Unigene34514	314	0.37	2.4607	Up
Unigene31559	240	0.4841	3.2195	Up
CL6241.Contig1	568	0.4091	2.7207	Up
Unigene34381	208	0.5586	3.7148	Up
Unigene31307	290	0.8013	5.3288	Up
CL1465.Contig6	1690	0.275	1.8288	Up
Unigene31338	257	0.4521	3.0065	Up
CL8792.Contig1	557	0.6258	4.1616	Up
Unigene32186	210	0.5533	3.6794	Up
CL3896.Contig5	337	2.7583	18.3423	Up
Unigene33814	250	1.8591	12.3627	Up
CL9531.Contig2	667	0.1742	1.1584	Up
Unigene32005	212	0.5481	3.6447	Up
CL6129.Contig3	397	2.0488	13.6239	Up
Unigene33810	211	1.1014	7.3239	Up
Unigene33901	386	0.9031	6.0052	Up
Unigene34726	286	0.4063	2.7016	Up
Unigene34621	234	0.4966	3.302	Up
CL3623.Contig13	1358	0.0856	0.569	Up
Unigene10215	1172	27.5121	182.366	Up
Unigene31789	729	1.1954	7.9085	Up
CL4926.Contig1	2104	0.2485	1.6385	Up
CL4171.Contig2	436	5.4633	35.9889	Up
Unigene5484	411	0.9895	6.5076	Up
Unigene30587	509	1.598	10.5093	Up
Unigene17997	346	8.2277	53.9392	Up
Unigene33585	230	1.263	8.2694	Up
Unigene31822	502	0.9259	6.0383	Up
Unigene7665	504	1.6138	10.4957	Up
Unigene6034	1096	76.6507	497.724	Up
Unigene32125	271	0.6431	4.1671	Up
Unigene34066	302	0.5771	3.7394	Up
Unigene33882	225	0.7746	5.0191	Up
Unigene29328	253	0.6889	4.4636	Up
Unigene16102	260	6.0332	39.0907	Up
Unigene34223	230	0.7578	4.9099	Up
Unigene33719	235	0.7417	4.8055	Up
Unigene31791	322	1.0826	7.0142	Up
Unigene32864	330	0.5282	3.4221	Up
CL7538.Contig1	290	7.4125	47.9589	Up
CL7395.Contig3	958	0.4245	2.7298	Up
Unigene31090	686	0.9316	5.9783	Up
Unigene30243	566	1.5397	9.871	Up
Unigene33319	249	0.9333	5.9675	Up
Unigene31682	319	1.457	9.316	Up
CL3483.Contig14	556	0.418	2.6725	Up
CL4359.Contig2	311	2.6153	16.6268	Up
CL204.Contig3	2044	5.5142	35.0394	Up
CL153.Contig1	1806	7.5919	48.2137	Up
Unigene1404	520	6.0332	38.2906	Up
Unigene31762	239	1.2154	7.7093	Up
CL9323.Contig2	439	0.6617	4.1971	Up
Unigene13960	508	1.258	7.956	Up
Unigene31650	617	1.6007	10.1147	Up
CL9957.Contig1	258	3.8281	24.1891	Up
CL1431.Contig2	1244	0.2802	1.7678	Up
Unigene15694	251	53.2369	335.069	Up
Unigene7904	361	3.2187	20.2511	Up
CL7088.Contig3	1749	27.0392	170.085	Up
Unigene33038	320	1.2709	7.9867	Up
CL5226.Contig3	627	5.2816	33.1781	Up
Unigene16607	1114	14.4983	91.075	Up
Unigene33848	337	1.3792	8.6421	Up
CL8272.Contig3	1015	5.7811	36.1887	Up
CL9688.Contig2	244	2.1429	13.3975	Up
Unigene33559	331	1.5797	9.8761	Up
CL6292.Contig1	1442	3.2635	20.3204	Up
Unigene32420	749	0.9308	5.7928	Up
CL4396.Contig1	1702	24.4065	151.279	Up
CL838.Contig2	2071	1.6551	10.2169	Up
CL3721.Contig3	923	0.0629	0.3864	Up
CL718.Contig4	757	0.0767	0.4711	Up
CL1927.Contig8	913	0.0636	0.3906	Up
Unigene29506	560	0.1037	0.6368	Up
Unigene33216	452	0.1285	0.789	Up
CL8525.Contig1	361	0.1609	0.9879	Up
Unigene34985	212	0.274	1.6822	Up
CL7029.Contig1	287	0.2024	1.2426	Up
CL1998.Contig1	252	0.2305	1.4151	Up
Unigene34939	255	0.2278	1.3985	Up
Unigene35097	206	0.282	1.7312	Up
CL2933.Contig1	206	0.282	1.7312	Up
CL1356.Contig3	564	0.206	1.2646	Up
Unigene33053	343	0.5081	3.1191	Up
Unigene34232	294	0.5928	3.639	Up
Unigene32060	224	0.5187	3.1841	Up
Unigene29870	392	0.4446	2.7292	Up
Unigene35135	202	0.2876	1.7654	Up
Unigene27752	338	1.0313	6.3305	Up
Unigene31088	420	1.1066	6.7927	Up
Unigene31154	274	0.6361	3.9046	Up
Unigene32206	220	1.0563	6.4839	Up
Unigene31964	334	1.2176	7.474	Up
Unigene32073	325	0.8938	5.4864	Up
Unigene34317	218	0.533	3.2717	Up
Unigene32497	229	1.0148	6.2291	Up
CL1345.Contig10	1043	0.0557	0.3419	Up
CL11132.Contig1	613	0.3791	2.327	Up
Unigene31862	398	0.5839	3.5841	Up
Unigene32283	212	0.5481	3.3643	Up
Unigene30147	483	0.9623	5.9067	Up
CL4480.Contig11	729	0.0797	0.4892	Up
Unigene34421	322	0.5413	3.3225	Up
Unigene31387	335	0.5203	3.1936	Up
Unigene34358	204	0.5696	3.4962	Up
Unigene35129	204	0.2848	1.7481	Up
CL1019.Contig2	219	0.2653	1.6284	Up
Unigene33787	219	0.5306	3.2568	Up
Unigene34027	280	0.83	5.0945	Up
Unigene33986	287	1.0122	6.2128	Up
Unigene34778	250	0.4648	2.8529	Up
CL4817.Contig4	839	0.1385	0.8501	Up
Unigene31635	223	0.5211	3.1984	Up
CL8771.Contig1	209	0.278	1.7063	Up
Unigene31263	209	0.556	3.4126	Up
Unigene31266	206	0.5641	3.4623	Up
Unigene29458	485	0.1198	0.7353	Up
CL9422.Contig2	246	0.2362	1.4497	Up
Unigene30257	573	0.2028	1.2447	Up
Unigene31492	270	0.2152	1.3208	Up
Unigene30594	213	0.2728	1.6743	Up
CL3925.Contig2	251	0.2315	1.4208	Up
Unigene22911	401	0.1449	0.8893	Up
Unigene30209	1023	0.0568	0.3486	Up
Unigene22912	333	0.1745	1.0709	Up
CL1182.Contig12	1127	0.1547	0.9493	Up
Unigene1657	990	0.0587	0.3602	Up
CL4618.Contig6	1101	0.0528	0.3239	Up
CL6344.Contig5	1831	0.0635	0.3895	Up
CL3693.Contig9	900	0.0646	0.3962	Up
Unigene30340	1362	0.0427	0.2618	Up
CL537.Contig1	2115	0.0275	0.1686	Up
CL9757.Contig1	1277	2.0473	12.5202	Up
Unigene32800	234	7.2001	43.9421	Up
CL8637.Contig1	579	2.6089	15.9112	Up
CL7372.Contig1	770	1.0563	6.4068	Up
CL7294.Contig1	506	1.263	7.6351	Up
Unigene30997	377	1.6952	10.2476	Up
CL5438.Contig2	531	9.9565	59.9959	Up
CL3427.Contig1	1886	81.6324	491.719	Up
CL808.Contig2	244	5.9526	35.8079	Up
Unigene33837	335	1.3874	8.3388	Up
Unigene31685	203	2.2896	13.7611	Up
CL6647.Contig2	270	4.9491	29.7181	Up
Unigene32687	415	0.98	5.872	Up
CL589.Contig10	1711	0.6791	4.0643	Up
Unigene32010	365	0.955	5.6994	Up
Unigene9502	1720	119.843	715.204	Up
Unigene30398	300	2.3239	13.8684	Up
Unigene33923	334	1.0437	6.2283	Up
Unigene19552	318	9.5002	56.6326	Up
CL2590.Contig1	1993	2.6819	15.9252	Up
Unigene208	1708	3.4695	20.6008	Up
Unigene33047	319	0.9106	5.4033	Up
CL8193.Contig2	627	0.9266	5.4981	Up
Unigene33013	209	1.3899	8.2471	Up
CL7630.Contig2	960	10.7118	63.4605	Up
Unigene13062	1397	3.7429	22.1663	Up
Unigene32328	449	1.8115	10.7223	Up
Unigene4955	1717	11.1323	65.8748	Up
CL3495.Contig2	1718	8.0485	47.6043	Up
Unigene9993	1965	130.949	771.612	Up
Unigene32054	273	0.8512	5.0074	Up
CL4737.Contig2	818	0.5682	3.3424	Up
Unigene32148	293	1.5863	9.3313	Up
Unigene34030	295	0.7878	4.634	Up
Unigene2077	725	2.404	14.1007	Up
CL7025.Contig1	1244	4.4834	26.2781	Up
Unigene32088	351	1.1586	6.7734	Up
Unigene6306	1303	1.3376	7.8001	Up
Unigene16185	317	5.4982	32.0618	Up
Unigene18693	430	21.8879	127.581	Up
CL1571.Contig1	244	961.945	5606.49	Up
Unigene13496	981	22.4455	130.445	Up
CL8135.Contig6	301	0.579	3.3569	Up
Unigene31289	252	0.6916	4.0096	Up
CL249.Contig1	1180	0.1477	0.8563	Up
Unigene32051	269	0.6479	3.7562	Up
Unigene30264	216	0.8069	4.6778	Up
Unigene34236	274	0.6361	3.6876	Up
Unigene34154	230	0.7578	4.3931	Up
Unigene30959	339	1.0283	5.9612	Up
Unigene34508	308	0.5659	3.2806	Up
Unigene34141	213	0.8183	4.7437	Up
Unigene30011	235	0.7417	4.2996	Up
Unigene34057	478	0.7293	4.2277	Up
Unigene33257	379	0.9198	5.332	Up
Unigene18710	903	525.452	3040.33	Up
Unigene33801	380	2.4462	14.077	Up
Unigene33212	550	0.8451	4.863	Up
Unigene15750	360	1.6138	9.2456	Up
CL6094.Contig2	1107	7.6099	43.5973	Up
CL2589.Contig1	1035	0.2807	1.6079	Up
Unigene30760	241	6.991	39.953	Up
CL8156.Contig1	721	0.967	5.5232	Up
Unigene4324	493	15.202	86.5622	Up
Unigene17281	1355	18.1368	103.125	Up
Unigene3980	551	2.9523	16.7198	Up
Unigene701	577	1.7117	9.6828	Up
Unigene5157	207	5.894	33.3072	Up
Unigene14489	768	12.9358	73.057	Up
CL5916.Contig1	1685	0.862	4.8678	Up
CL6128.Contig7	2765	0.6934	3.9123	Up
CL4359.Contig1	1335	19.1048	107.698	Up
CL3693.Contig2	1289	0.0901	0.5072	Up
CL8645.Contig2	696	0.1669	0.9394	Up
Unigene34684	241	0.4821	2.7129	Up
CL668.Contig3	547	0.2124	1.1952	Up
Unigene32055	338	0.6875	3.8686	Up
Unigene32500	358	0.6491	3.6525	Up
Unigene34957	207	0.5613	3.1584	Up
CL3465.Contig2	207	0.5613	3.1584	Up
Unigene31854	299	1.1658	6.5598	Up
Unigene32519	231	1.006	5.6606	Up
Unigene34497	218	0.533	2.9991	Up
CL9773.Contig2	220	1.0563	5.9436	Up
Unigene31304	210	0.5533	3.1133	Up
Unigene31655	440	1.3204	7.4295	Up
CL7299.Contig1	230	0.5052	2.8426	Up
Unigene31600	222	0.5234	2.945	Up
Unigene33755	402	1.1562	6.5055	Up
Unigene31538	323	0.7195	4.0483	Up
Unigene34231	201	0.5781	3.2527	Up
Unigene34548	201	0.5781	3.2527	Up
Unigene34960	201	0.5781	3.2527	Up
Unigene32766	201	0.5781	3.2527	Up
Unigene34930	239	0.4862	2.7356	Up
Unigene34767	221	0.5258	2.9584	Up
Unigene34157	303	0.767	4.3155	Up
Unigene32760	277	0.839	4.7206	Up
CL7705.Contig2	544	0.2136	1.2018	Up
Unigene34519	254	0.4575	2.574	Up
Unigene34554	268	0.4336	2.4395	Up
CL2589.Contig2	1203	0.1932	1.0869	Up
Unigene29646	1173	0.0991	0.5574	Up
Unigene31036	1567	0.0742	0.4172	Up
CL5209.Contig1	1963	18.2018	102.31	Up
CL8179.Contig3	1138	69.3292	386.544	Up
CL4225.Contig2	451	1.1594	6.4576	Up
CL2073.Contig2	1023	0.3975	2.2078	Up
Unigene31464	379	1.073	5.9593	Up
CL8792.Contig4	478	0.8508	4.7251	Up
Unigene14551	1017	5.9983	33.3123	Up
Unigene33852	364	1.1173	6.2049	Up
Unigene4129	471	1.4802	8.2024	Up
CL3440.Contig3	261	2.6712	14.8021	Up
Unigene29337	487	1.4316	7.933	Up
CL9744.Contig1	1211	133.514	739.394	Up
CL6257.Contig3	3613	6.9145	38.2807	Up
Unigene30946	300	0.9683	5.3493	Up
Unigene30707	313	0.9281	5.1271	Up
Unigene31253	412	0.7051	3.8951	Up
CL9957.Contig2	345	2.1892	12.0595	Up
Unigene33846	410	1.1336	6.2336	Up
CL4454.Contig3	1559	5.7017	31.3384	Up
CL8400.Contig1	221	2.8917	15.8676	Up
CL1465.Contig4	379	1.6862	9.2526	Up
Unigene33809	424	2.3294	12.7564	Up
Unigene33790	308	7.1679	39.1739	Up
Unigene30759	348	0.5008	2.7327	Up
CL22.Contig5	233	0.748	4.0815	Up
Unigene1375	295	0.5908	3.2237	Up
Unigene29865	304	0.5733	3.1282	Up
Unigene31319	242	0.7202	3.9297	Up
Unigene33847	520	1.3407	7.3152	Up
Unigene34601	333	0.5234	2.8558	Up
Unigene9363	383	6.371	34.7616	Up
Unigene33931	291	1.1979	6.5359	Up
Unigene31668	204	0.8544	4.6617	Up
CL4741.Contig1	283	0.6159	3.3604	Up
Unigene34219	280	0.6225	3.3964	Up
CL1145.Contig4	497	0.3507	1.9134	Up
Unigene34561	214	0.8145	4.4438	Up
CL5180.Contig1	682	0.2556	1.3944	Up
Unigene18174	627	1.7605	9.5743	Up
CL6977.Contig5	775	8.2461	44.788	Up
Unigene20120	295	2.7572	14.9094	Up
CL2590.Contig2	778	3.2111	17.3419	Up
Unigene19543	1152	2.7233	14.7043	Up
Unigene31760	739	1.1792	6.3538	Up
Unigene20351	714	2.5224	13.5688	Up
Unigene1587	1061	19.0556	102.459	Up
CL5273.Contig2	1672	7.9919	42.9419	Up
Unigene34100	312	0.7448	4.0005	Up
Unigene33408	220	1.0563	5.6735	Up
Unigene34087	234	0.9931	5.334	Up
CL10993.Contig2	345	0.6736	3.6179	Up
Unigene33361	212	1.0962	5.8875	Up
Unigene31596	247	0.9409	5.0533	Up
Unigene34239	374	0.6214	3.3373	Up
Unigene19746	1129	269.081	1444.26	Up
Unigene10365	927	35.1594	188.696	Up
Unigene30779	243	2.1518	11.4959	Up
CL2605.Contig1	1674	4.3382	23.1496	Up
CL7591.Contig1	437	0.6647	3.5362	Up
Unigene32424	251	1.1573	6.1567	Up
Unigene32914	222	1.3085	6.961	Up
Unigene31586	370	0.7851	4.1766	Up
Unigene32499	282	1.0301	5.4799	Up
Unigene32104	357	0.8137	4.3287	Up
CL3206.Contig2	460	0.6315	3.3594	Up
Unigene34221	326	0.8911	4.7403	Up
Unigene32913	781	1.1902	6.3165	Up
CL11326.Contig2	322	2.8868	15.3205	Up
Unigene1027	1550	14.2808	75.7332	Up
Unigene32020	358	1.7851	9.4633	Up
Unigene33827	311	2.0549	10.8935	Up
Unigene15256	1280	17.6108	93.3334	Up
CL7080.Contig5	982	0.355	1.8763	Up
CL3930.Contig2	874	4.1213	21.6935	Up
Unigene32518	287	1.417	7.4554	Up
Unigene33885	295	1.3786	7.2532	Up
Unigene31734	352	1.1554	6.0787	Up
Unigene19747	1257	39.1015	205.119	Up
CL6756.Contig3	1226	2.6063	13.6713	Up
Unigene32035	428	1.0859	5.6937	Up
CL3206.Contig1	502	1.9675	10.3007	Up
Unigene32739	429	1.2188	6.3731	Up
Unigene31656	291	1.7968	9.3954	Up
Unigene32249	245	2.1342	11.1594	Up
Unigene16372	894	1.2347	6.4489	Up
CL4498.Contig1	1183	5.2548	27.4321	Up
Unigene29417	288	2.0173	10.5252	Up
Unigene32247	373	1.5576	8.1267	Up
Unigene3438	706	2.6333	13.7225	Up
Unigene30535	426	1.6366	8.5108	Up
Unigene6471	439	5.426	28.1611	Up
CL7484.Contig1	1605	54.8398	283.553	Up
Unigene7390	559	182.4	942.792	Up
Unigene15558	924	2.5779	13.3153	Up
CL6756.Contig1	1865	13.2394	68.3596	Up
Unigene13858	255	5.9237	30.5339	Up
Unigene11148	1187	33.2336	171.048	Up
Unigene17083	1091	2.1301	10.9502	Up
Unigene4937	524	13.8592	71.2327	Up
CL1664.Contig2	942	4.749	24.355	Up
CL684.Contig7	1433	0.0405	0.2074	Up
CL3413.Contig2	1492	0.0389	0.1992	Up
CL2982.Contig7	1626	0.0357	0.1828	Up
CL3693.Contig14	1246	0.0466	0.2385	Up
CL1644.Contig4	2066	0.0281	0.1438	Up
CL1148.Contig9	1838	0.0316	0.1617	Up
CL4351.Contig3	600	0.0968	0.4953	Up
CL3693.Contig6	1188	0.0489	0.2502	Up
CL3723.Contig3	1853	0.0627	0.3208	Up
CL2697.Contig3	867	0.067	0.3428	Up
Unigene32851	286	0.2031	1.0391	Up
CL8645.Contig1	681	0.0853	0.4364	Up
CL10087.Contig2	274	0.212	1.0846	Up
Unigene29927	347	0.1674	0.8564	Up
Unigene30216	561	0.2071	1.0595	Up
CL9578.Contig2	211	0.2753	1.4084	Up
CL3823.Contig4	498	0.2333	1.1935	Up
CL8391.Contig1	343	0.5081	2.5993	Up
CL629.Contig1	1094	0.3717	1.9015	Up
Unigene31532	216	0.5379	2.7517	Up
CL1294.Contig2	1066	0.0545	0.2788	Up
Unigene34941	226	0.5141	2.6299	Up
Unigene31463	310	0.7496	3.8346	Up
CL2930.Contig2	220	0.7922	4.0525	Up
CL4832.Contig3	627	0.1853	0.9479	Up
Unigene34736	269	0.6479	3.3143	Up
Unigene34904	310	0.5622	2.8759	Up
CL5264.Contig1	274	0.8481	4.3384	Up
Unigene33959	319	1.0927	5.5896	Up
Unigene34470	205	0.2834	1.4497	Up
CL11139.Contig1	228	0.2548	1.3034	Up
Unigene31417	246	0.7085	3.6242	Up
Unigene29851	220	1.0563	5.4033	Up
Unigene33835	267	1.9583	10.0173	Up
Unigene32482	229	0.5074	2.5955	Up
Unigene33366	263	0.6627	3.3899	Up
Unigene32124	222	0.7851	4.016	Up
Unigene31796	250	1.8591	9.5098	Up
Unigene33912	293	1.1897	6.0856	Up
Unigene30422	324	1.4345	7.3378	Up
Unigene29672	345	0.1684	0.8614	Up
Unigene34813	230	0.5052	2.5842	Up
Unigene34531	249	0.9333	4.774	Up
Unigene35102	204	0.2848	1.4568	Up
Unigene34541	413	0.5627	2.8783	Up
Unigene33017	273	3.1922	16.3286	Up
Unigene29984	509	0.799	4.087	Up
Unigene29963	261	1.5582	7.9704	Up
Unigene34553	203	0.5724	2.9279	Up
Unigene34213	203	1.1448	5.8558	Up
Unigene35045	203	0.5724	2.9279	Up
Unigene17970	318	2.1924	11.2144	Up
Unigene32410	212	0.5481	2.8036	Up
CL2499.Contig8	1393	0.0417	0.2133	Up
CL9886.Contig1	418	0.139	0.711	Up
Unigene32352	264	1.5405	7.8798	Up
Unigene32616	240	1.2104	6.1913	Up
Unigene32602	273	1.2769	6.5314	Up
Unigene32827	267	0.6528	3.3391	Up
Unigene3536	217	1.3387	6.8475	Up
Unigene33098	256	0.4539	2.3217	Up
Unigene31303	204	0.5696	2.9135	Up
Unigene31598	219	0.5306	2.714	Up
CL2101.Contig2	329	0.1766	0.9033	Up
CL1814.Contig2	443	0.5246	2.6833	Up
CL8132.Contig2	642	0.0905	0.4629	Up
CL10136.Contig1	250	0.4648	2.3774	Up
Unigene32711	227	0.5119	2.6183	Up
CL7141.Contig1	274	0.4241	2.1692	Up
CL3023.Contig4	239	0.2431	1.2434	Up
CL9.Contig12	635	0.0915	0.468	Up
CL11233.Contig2	209	0.278	1.4219	Up
Unigene31505	209	0.556	2.8438	Up
CL1057.Contig2	507	0.4584	2.3446	Up
Unigene33347	551	0.2109	1.0787	Up
Unigene32523	236	0.4924	2.5185	Up
Unigene34698	220	0.5282	2.7016	Up
Unigene29644	1072	0.0542	0.2772	Up
CL1297.Contig1	455	0.1277	0.6531	Up
CL3439.Contig3	540	0.1076	0.5503	Up
CL8834.Contig2	746	0.0779	0.3984	Up
CL1026.Contig1	1475	0.0394	0.2015	Up
CL1170.Contig4	892	0.1303	0.6663	Up
CL2654.Contig14	1289	0.0451	0.2306	Up
CL9279.Contig3	638	0.0911	0.4658	Up
CL4368.Contig6	619	0.0939	0.4801	Up
Unigene32900	924	0.0629	0.3216	Up
CL10797.Contig3	860	0.0676	0.3456	Up
CL2499.Contig3	1661	0.035	0.1789	Up
CL2002.Contig1	1542	0.0754	0.3854	Up
CL6142.Contig5	1292	0.045	0.23	Up
CL2976.Contig5	1979	0.0294	0.1502	Up
Unigene15132	1689	3.7149	18.9675	Up
CL5871.Contig1	494	8.4677	43.1935	Up
CL2422.Contig3	931	142.155	723.513	Up
Unigene12759	991	86.2378	438.304	Up
CL3371.Contig4	1895	72.8137	370.041	Up
CL4430.Contig1	1868	2.6436	13.4272	Up
Unigene9217	1024	2.7233	13.8143	Up
Unigene13577	311	11.769	59.6273	Up
CL7028.Contig1	956	4.9833	25.2417	Up
CL10161.Contig2	783	4.5261	22.8484	Up
Unigene18582	418	1.9459	9.8112	Up
Unigene16403	654	2.2209	11.1784	Up
CL8808.Contig2	406	12.1633	61.1929	Up
Unigene33828	407	1.713	8.6161	Up
Unigene33127	448	1.4265	7.1642	Up
CL589.Contig12	1401	4.6445	23.2908	Up
CL8936.Contig2	1099	0.5286	2.65	Up
Unigene18599	305	1.9048	9.5488	Up
Unigene32526	369	1.417	7.0872	Up
Unigene33542	417	1.2539	6.2714	Up
Unigene31214	391	1.3373	6.6885	Up
CL1565.Contig1	1147	3.1404	15.7011	Up
Unigene5810	819	68.3126	341.522	Up
Unigene19201	472	26.9563	134.487	Up
CL5436.Contig1	1723	30.6842	152.954	Up
CL2608.Contig5	1439	121.363	604.77	Up
CL3051.Contig2	1529	11.8931	59.203	Up
Unigene6460	671	17.4899	86.9841	Up
Unigene32451	359	1.1328	5.6291	Up
Unigene23928	216	1.8828	9.3557	Up
CL11233.Contig1	227	1.7916	8.9023	Up
CL10520.Contig2	486	8.8461	43.7822	Up
Unigene9716	313	6.8678	33.9907	Up
Unigene33793	351	6.1243	30.3108	Up
Unigene6651	1627	4.9992	24.7316	Up
Unigene31275	404	0.8628	4.2665	Up
Unigene32427	282	1.2361	6.1122	Up
CL4396.Contig2	585	1.7876	8.8392	Up
CL283.Contig2	353	0.9875	4.8829	Up
Unigene31829	334	1.0437	5.1606	Up
Unigene31736	306	1.1392	5.6328	Up
CL7630.Contig3	1051	33.6093	166.093	Up
Unigene8394	1480	42.16	208.147	Up
Unigene1829	398	2.4816	12.2456	Up
CL6992.Contig2	330	1.9366	9.5458	Up
CL915.Contig2	1956	17.554	86.3283	Up
Unigene30917	244	1.1905	5.8462	Up
Unigene16357	234	2.4828	12.192	Up
Unigene34113	345	0.842	4.1347	Up
Unigene32656	435	1.3356	6.5585	Up
CL9342.Contig2	634	0.4582	2.25	Up
Unigene31726	250	1.162	5.7059	Up
Unigene32911	1298	0.4476	2.1979	Up
CL2159.Contig2	254	1.1437	5.616	Up
CL3656.Contig1	1720	0.5067	2.488	Up
Unigene7739	666	3.4021	16.5993	Up
CL2422.Contig1	836	359.427	1753.44	Up
Unigene8002	661	4.8341	23.5587	Up
CL6890.Contig2	1142	13.1763	64.1203	Up
Unigene31571	217	1.0709	5.2041	Up
CL11059.Contig2	209	1.1119	5.4033	Up
Unigene32046	285	0.8154	3.9624	Up
Unigene29937	609	0.7632	3.7087	Up
Unigene32279	422	1.6521	8.0281	Up
Unigene34075	272	0.8544	4.1518	Up
Unigene31824	201	1.1562	5.6183	Up
CL4905.Contig5	693	0.6707	3.2591	Up
Unigene32183	248	0.9371	4.5536	Up
Unigene34543	292	0.7959	3.8674	Up
Unigene22476	438	6.7648	32.8392	Up
Unigene8013	587	15.5389	75.3331	Up
Unigene5494	219	9.8156	47.4947	Up
Unigene31840	420	1.5216	7.3588	Up
Unigene31750	859	1.2174	5.8813	Up
Unigene17131	790	6.8393	33.0285	Up
Unigene18857	813	24.7969	119.75	Up
Unigene32394	280	1.4524	7.005	Up
Unigene30378	390	3.1283	15.0876	Up
Unigene8862	1694	6.5849	31.7531	Up
CL2247.Contig2	2465	3.8653	18.6145	Up
Unigene32610	328	1.7713	8.5168	Up
Unigene33786	345	12.7983	61.5035	Up
Unigene4570	1163	3.7966	18.2448	Up
CL119.Contig1	1820	17.5251	84.0598	Up
Unigene8279	528	3.5211	16.8853	Up
Unigene6060	1183	6.7281	32.2553	Up
Unigene1633	819	341.705	1636.35	Up
Unigene5778	569	21.8504	104.562	Up
CL7692.Contig1	732	3.1747	15.1838	Up
CL2002.Contig3	1727	0.1009	0.4818	Up
CL2964.Contig1	831	0.2097	1.0013	Up
Unigene29673	603	0.289	1.3799	Up
Unigene31909	368	0.4736	2.2612	Up
Unigene34886	266	0.6552	3.1282	Up
Unigene34065	424	0.8221	3.925	Up
Unigene34391	211	0.826	3.9436	Up
Unigene30108	319	1.6391	7.8255	Up
Unigene34451	274	0.6361	3.0369	Up
Unigene31115	226	0.7712	3.6819	Up
Unigene32255	218	0.7995	3.817	Up
Unigene15680	454	1.5356	7.3313	Up
Unigene31647	265	0.6577	3.14	Up
Unigene31733	229	1.5222	7.2673	Up
Unigene33524	412	4.2304	20.1968	Up
Unigene32545	353	0.9875	4.7145	Up
Unigene29392	222	0.7851	3.7482	Up
Unigene5567	393	1.3305	6.352	Up
CL5180.Contig3	601	0.29	1.3845	Up
CL1582.Contig4	375	0.4648	2.219	Up
CL7015.Contig1	550	0.3169	1.5129	Up
Unigene34918	283	0.6159	2.9403	Up
Unigene34431	308	0.5659	2.7016	Up
CL5573.Contig3	1533	0.1137	0.5428	Up
CL297.Contig2	391	0.4458	2.1282	Up
Unigene25676	427	9.6603	46.0735	Up
CL589.Contig11	1547	1.5022	7.1462	Up
CL5932.Contig3	1764	59.7444	283.906	Up
Unigene32707	442	1.8402	8.7406	Up
Unigene16978	321	4.5247	21.4785	Up
CL6004.Contig1	415	1.5399	7.3042	Up
CL11710.Contig1	928	288.109	1365.82	Up
CL4926.Contig2	3506	1.9885	9.4257	Up
Unigene6403	1243	13.7883	65.3177	Up
CL4699.Contig10	1702	2.287	10.8256	Up
CL3483.Contig7	4641	0.2003	0.9477	Up
Unigene10207	396	60.0049	283.823	Up
CL4795.Contig5	1250	5.0196	23.7269	Up
CL1704.Contig1	2201	2.4284	11.4768	Up
Unigene32284	390	0.7448	3.5052	Up
Unigene34102	328	0.8856	4.1678	Up
Unigene31797	264	1.1003	5.1782	Up
Unigene32405	233	1.2467	5.8671	Up
Unigene33184	1161	1.0008	4.7098	Up
Unigene11904	740	1.5702	7.3894	Up
Unigene31351	298	0.9748	4.5874	Up
Unigene18975	672	3.4582	16.2742	Up
Unigene34017	265	1.0962	5.1586	Up
CL10409.Contig1	245	1.1857	5.5797	Up
CL4730.Contig3	310	0.9371	4.4098	Up
CL5844.Contig1	1784	3.224	15.1589	Up
CL1541.Contig4	1050	17.8166	83.6635	Up
Unigene8243	493	4.0067	18.8074	Up
Unigene33527	329	1.2361	5.781	Up
Unigene32516	376	1.0816	5.0584	Up
CL7516.Contig1	327	4.4417	20.7209	Up
Unigene1230	293	3.5691	16.634	Up
Unigene11478	243	6.9335	32.2863	Up
CL7080.Contig6	1751	1.3272	6.1778	Up
CL3974.Contig2	746	15.1864	70.6701	Up
Unigene32239	416	1.5362	7.1438	Up
Unigene11832	348	1.8364	8.5397	Up
CL7495.Contig1	897	1.4249	6.6261	Up
CL378.Contig1	965	4.997	23.2202	Up
Unigene33825	571	2.4419	11.346	Up
Unigene4979	1341	46.8334	217.534	Up
Unigene13966	501	1.5075	6.9995	Up
CL3118.Contig1	318	3.1058	14.3918	Up
CL3978.Contig1	2292	0.4816	2.2302	Up
CL481.Contig1	2056	3.8148	17.6632	Up
Unigene6632	1449	2.3656	10.952	Up
CL2197.Contig2	1375	8.5773	39.6385	Up
Unigene557	456	4.7141	21.7672	Up
CL815.Contig7	2764	0.042	0.1935	Up
CL1595.Contig10	689	0.1686	0.7764	Up
Unigene29647	750	0.1549	0.7132	Up
Unigene34532	235	0.4944	2.2763	Up
Unigene32097	215	0.5404	2.488	Up
CL8674.Contig2	264	0.4401	2.0262	Up
Unigene32091	221	1.0515	4.841	Up
Unigene31118	221	1.0515	4.841	Up
CL8226.Contig2	453	0.2565	1.1809	Up
Unigene34318	360	0.6455	2.9718	Up
Unigene31131	304	0.3822	1.7596	Up
Unigene35015	281	0.4135	1.9037	Up
Unigene34911	238	0.4882	2.2476	Up
CL2474.Contig1	225	0.5164	2.3774	Up
Unigene31716	281	1.2405	5.711	Up
Unigene31256	263	0.8836	4.0679	Up
Unigene31816	308	1.509	6.9471	Up
CL4050.Contig11	297	1.5649	7.2044	Up
Unigene17988	260	4.0221	18.5167	Up
Unigene35025	230	0.5052	2.3258	Up
Unigene31613	230	0.5052	2.3258	Up
Unigene34404	308	0.7545	3.4735	Up
CL11397.Contig1	221	1.5773	7.2614	Up
Unigene15933	258	1.8015	8.2934	Up
Unigene34975	262	0.4435	2.0417	Up
Unigene32089	203	0.5724	2.6351	Up
Unigene34933	203	0.5724	2.6351	Up
CL612.Contig5	252	0.4611	2.1227	Up
CL7363.Contig2	348	0.3339	1.5371	Up
CL2329.Contig1	720	0.1614	0.743	Up
Unigene34463	200	0.581	2.6746	Up
Unigene34110	227	0.5119	2.3565	Up
Unigene34999	265	0.4385	2.0186	Up
Unigene35064	209	0.556	2.5595	Up
CL204.Contig5	855	0.1359	0.6256	Up
CL8004.Contig2	397	0.2927	1.3474	Up
CL4252.Contig3	329	0.3532	1.6259	Up
CL10835.Contig2	243	0.4782	2.2013	Up
CL7162.Contig2	339	0.3428	1.578	Up
Unigene34968	206	0.5641	2.5967	Up
CL6586.Contig4	720	0.3228	1.4859	Up
Unigene34916	270	0.4304	1.9812	Up
CL3503.Contig2	485	0.2396	1.1029	Up
Unigene10390	1600	0.2179	1.003	Up
CL3693.Contig1	866	0.1342	0.6177	Up
CL1182.Contig6	1110	0.2094	0.9638	Up
CL3693.Contig8	822	0.1414	0.6508	Up
CL2044.Contig3	1426	0.0815	0.3751	Up
CL4773.Contig15	975	0.1192	0.5486	Up
CL2044.Contig2	810	0.1435	0.6604	Up
CL3492.Contig2	2922	0.0398	0.1831	Up
Unigene11130	1615	12.2671	56.4184	Up
Unigene14848	658	8.9177	41.0092	Up
CL2273.Contig1	1494	26.4823	121.697	Up
Unigene16735	712	47.6531	218.378	Up
Unigene7713	246	3.5425	16.1879	Up
CL1465.Contig1	1990	2.0144	9.1992	Up
CL4705.Contig2	1233	47.8728	218.608	Up
CL3458.Contig2	894	9.6829	44.2115	Up
Unigene33865	406	1.8603	8.4909	Up
CL6719.Contig3	1110	4.2396	19.3301	Up
Unigene33797	240	5.3256	24.2698	Up
Unigene31078	378	1.6907	7.7047	Up
Unigene848	276	6.5255	29.7181	Up
CL7469.Contig1	547	8.7093	39.6603	Up
CL10257.Contig1	532	0.9829	4.4689	Up
Unigene16146	543	2.6748	12.1499	Up
CL2422.Contig2	1008	42.8816	194.701	Up
CL7580.Contig1	231	9.8087	44.5128	Up
CL3859.Contig2	2031	6.6937	30.3765	Up
Unigene6392	487	42.7083	193.808	Up
CL1963.Contig2	298	1.3647	6.183	Up
CL10001.Contig2	259	1.5702	7.114	Up
Unigene31997	324	1.2552	5.6868	Up
Unigene33987	355	1.1456	5.1902	Up
Unigene32412	775	1.5743	7.1323	Up
Unigene31666	300	2.3239	10.5004	Up
Unigene7741	412	1.6922	7.6459	Up
CL11528.Contig1	312	3.1656	14.2875	Up
CL2422.Contig4	737	115.092	518.474	Up
CL4498.Contig3	958	0.3032	1.3649	Up
CL6698.Contig2	349	0.8323	3.7467	Up
CL4168.Contig1	493	0.5892	2.6523	Up
Unigene34181	293	0.9914	4.4628	Up
CL7876.Contig4	219	1.3264	5.9708	Up
CL10584.Contig2	231	2.515	11.3212	Up
Unigene31872	205	2.834	12.757	Up
Unigene34018	208	1.3966	6.2865	Up
Unigene32227	337	0.862	3.8801	Up
Unigene31905	217	1.3387	6.0258	Up
Unigene34278	356	0.816	3.673	Up
Unigene31219	283	1.0265	4.6205	Up
Unigene31037	1537	0.189	0.8507	Up
CL5744.Contig4	2615	0.1111	0.5	Up
Unigene17802	1116	3.8524	17.3089	Up
Unigene13637	486	2.7495	12.352	Up
Unigene12094	482	3.8571	17.2636	Up
CL7709.Contig1	1419	13.1426	58.7241	Up
Unigene16090	1584	28.3153	126.415	Up
CL7899.Contig1	1875	10.3181	45.8372	Up
CL5070.Contig1	1713	29.2354	129.837	Up
Unigene6114	440	18.2215	80.9143	Up
Unigene8317	364	19.3127	85.7253	Up
Unigene10557	316	11.3989	50.596	Up
CL2714.Contig2	519	0.3358	1.4888	Up
CL7133.Contig1	594	0.2934	1.3008	Up
Unigene7186	1879	0.1855	0.8224	Up
Unigene31359	228	0.7644	3.3889	Up
Unigene30867	299	0.5829	2.5842	Up
Unigene34739	220	0.7922	3.5121	Up
Unigene31880	220	0.7922	3.5121	Up
Unigene32855	365	0.955	4.2338	Up
CL10745.Contig1	286	1.2188	5.4033	Up
CL4694.Contig2	413	0.844	3.7417	Up
Unigene34613	255	0.6835	3.0301	Up
Unigene31545	229	0.7611	3.3741	Up
Unigene31543	229	0.7611	3.3741	Up
CL2123.Contig3	278	5.0156	22.2351	Up
CL7731.Contig1	461	1.5123	6.7043	Up
Unigene34069	246	0.7085	3.1409	Up
Unigene34316	203	0.8586	3.8063	Up
Unigene31683	203	0.8586	3.8063	Up
Unigene32956	207	1.684	7.4654	Up
Unigene5620	207	1.684	7.4654	Up
Unigene34526	230	0.7578	3.3594	Up
Unigene32083	304	1.1467	5.0834	Up
CL6400.Contig4	783	0.2226	0.9868	Up
Unigene34679	261	0.6678	2.9604	Up
Unigene34568	300	0.581	2.5756	Up
CL2083.Contig5	308	1.1318	5.0173	Up
Unigene9971	996	0.7	3.1031	Up
CL6461.Contig3	1264	0.1379	0.6113	Up
Unigene30909	214	0.8145	3.6106	Up
CL3255.Contig2	243	0.7173	3.1797	Up
Unigene34775	285	0.6116	2.7111	Up
Unigene31916	222	15.4404	68.2713	Up
CL5553.Contig1	1661	7.2054	31.8472	Up
CL7665.Contig1	495	2.9342	12.9679	Up
CL2608.Contig4	886	87.9333	388.616	Up
CL7725.Contig1	379	2.9125	12.8595	Up
CL9323.Contig1	424	2.1924	9.6724	Up
Unigene6608	2464	6.2955	27.7401	Up
CL808.Contig1	1703	11.2579	49.5592	Up
CL1358.Contig4	1400	99.5545	438.172	Up
CL10491.Contig1	838	16.1536	71.0681	Up
Unigene33430	313	3.1555	13.8621	Up
Unigene15391	1249	4.0468	17.75	Up
Unigene32493	275	1.4788	6.4839	Up
CL7681.Contig4	510	1.5948	6.9925	Up
Unigene31952	325	1.2513	5.4864	Up
Unigene22101	341	7.1557	31.3739	Up
Unigene32544	208	1.9552	8.5725	Up
CL6332.Contig4	1061	0.7666	3.3611	Up
Unigene33927	286	1.422	6.2346	Up
Unigene32463	624	1.3035	5.715	Up
Unigene33816	1102	1.687	7.3891	Up
CL11593.Contig2	718	20.3908	89.2371	Up
Unigene19598	1261	4.3308	18.9479	Up
Unigene30855	440	27.3323	119.548	Up
CL1111.Contig5	336	1.902	8.314	Up
Unigene32067	423	3.571	15.5967	Up
Unigene21366	493	3.064	13.3822	Up
Unigene19145	719	3.9594	17.277	Up
Unigene5712	483	2.2854	9.9676	Up
Unigene13999	360	5.6484	24.6	Up
Unigene34429	298	0.7798	3.3907	Up
Unigene32273	299	0.7772	3.3793	Up
Unigene34170	245	0.9485	4.1241	Up
Unigene31900	238	0.9764	4.2454	Up
Unigene33580	205	1.1336	4.9289	Up
Unigene15991	570	2.0385	8.8633	Up
CL6543.Contig2	206	1.1281	4.9049	Up
Unigene4751	920	1.7682	7.6879	Up
Unigene31865	226	1.0283	4.4709	Up
Unigene31735	255	1.8227	7.9248	Up
Unigene33867	337	1.3792	5.9965	Up
CL11219.Contig1	233	0.9974	4.3365	Up
CL4182.Contig1	419	1.1093	4.823	Up
Unigene34373	275	0.8451	3.6742	Up
CL9484.Contig4	439	0.5294	2.3016	Up
Unigene5808	930	5.1226	22.2406	Up
Unigene32492	307	2.4602	10.6482	Up
Unigene32671	681	1.1091	4.8003	Up
CL5295.Contig1	823	12.7067	54.9586	Up
Unigene7686	384	2.1181	9.1321	Up
CL529.Contig2	1587	3.2582	14.0445	Up
Unigene31284	311	0.934	4.0134	Up
Unigene29624	338	0.8594	3.6928	Up
Unigene31329	224	1.2968	5.5721	Up
Unigene31919	268	1.0839	4.6573	Up
CL5102.Contig1	653	0.8897	3.8228	Up
Unigene32325	347	1.6743	7.194	Up
Unigene31410	208	1.3966	6.0008	Up
CL6890.Contig1	1084	2.9478	12.6658	Up
Unigene32798	318	0.9135	3.925	Up
Unigene34055	266	1.0921	4.6923	Up
Unigene20245	1740	16.6613	71.5625	Up
Unigene9095	1535	2.1952	9.3704	Up
Unigene13417	1314	4.7309	20.1739	Up
CL494.Contig3	1280	0.2723	1.1609	Up
Unigene30954	465	0.7496	3.1955	Up
Unigene32085	303	1.1504	4.904	Up
Unigene33958	280	1.2449	5.3068	Up
Unigene31831	232	1.5025	6.4048	Up
Unigene32292	309	1.1281	4.8088	Up
Unigene5425	437	3.1907	13.601	Up
Unigene12293	615	5.6681	24.1611	Up
Unigene31812	224	1.5562	6.6335	Up
CL698.Contig2	1293	0.2696	1.1492	Up
Unigene32781	209	1.6679	7.1096	Up
Unigene34251	297	1.1737	5.003	Up
Unigene32624	324	1.0759	4.5861	Up
Unigene30520	322	1.0826	4.6146	Up
CL8991.Contig1	726	7.9224	33.7296	Up
Unigene21611	539	5.4972	23.3775	Up
CL7277.Contig1	622	1.2143	5.1601	Up
CL815.Contig5	2762	0.1472	0.6241	Up
Unigene31173	285	1.427	6.0479	Up
CL11423.Contig2	487	1.6702	7.0786	Up
CL6570.Contig2	2206	14.3006	60.5139	Up
Unigene30103	321	1.4479	6.1103	Up
Unigene31731	247	1.8817	7.9409	Up
CL9193.Contig2	767	0.606	2.5572	Up
CL2736.Contig3	1098	6.4553	27.1739	Up
Unigene32071	662	3.0716	12.9287	Up
CL1704.Contig2	2393	1.7237	7.2526	Up
CL4730.Contig5	1533	9.1334	38.4222	Up
Unigene30563	234	2.4828	10.414	Up
CL6981.Contig3	1288	23.9517	100.368	Up
Unigene12144	267	2.3935	10.0173	Up
Unigene32022	370	1.8842	7.8713	Up
Unigene31794	343	2.0326	8.4909	Up
Unigene14439	695	4.2633	17.7881	Up
Unigene12218	634	7.3309	30.5618	Up
Unigene33337	433	1.8784	7.8242	Up
CL87.Contig1	489	1.6633	6.9281	Up
CL8179.Contig1	1020	76.4952	317.925	Up
CL3656.Contig2	1821	0.5424	2.2521	Up
Unigene19352	496	88.9035	369.08	Up
CL8588.Contig1	877	3.4448	14.2999	Up
CL5391.Contig1	1875	3.3774	14.0111	Up
CL915.Contig1	1972	41.0396	169.628	Up
CL9410.Contig2	526	2.8717	11.8646	Up
CL9444.Contig2	1011	3.0457	12.581	Up
CL10548.Contig1	1630	1.9603	8.095	Up
Unigene14630	982	8.7561	36.1338	Up
CL5960.Contig1	1402	1.699	6.995	Up
CL6844.Contig1	600	4.1637	17.1374	Up
CL8361.Contig2	2038	3.1928	13.0946	Up
Unigene27274	947	0.0613	0.2511	Up
CL3780.Contig3	947	0.0613	0.2511	Up
CL7151.Contig3	1073	0.0541	0.2216	Up
Unigene17311	1212	0.0479	0.1962	Up
CL4239.Contig2	1544	0.0376	0.154	Up
CL5093.Contig7	1083	0.0536	0.2195	Up
CL7278.Contig2	1341	0.0866	0.3546	Up
[truncated: 63,537 more rows]

## Sheet: Table S5
Table S5 List of candidate genes encoding enzymes of ginsenosides biosynthesis pathway
Ginsenoside biosynthesis steps	Name of enzymes	Unigene ID	Nr annotation	Swiss-prot annotation	KEGG annotation	FPKM (Pg-Con)	FPKM (Pg-MeJA)	Epression
Step 1	AACT (3 unigenes)	CL3427.Contig1	acetyl-CoA C-acetyltransferase [Camellia chekiangoleosa]	Acetyl-CoA acetyltransferase, cytosolic 1 OS=Arabidopsis thaliana GN=AAT1 PE=2 SV=1	acetyl-CoA C-acetyltransferase [EC:2.3.1.9]	81.6324	491.719	Up
		CL3427.Contig2	acetyl-CoA C-acetyltransferase protein [Camellia oleifera]	Acetyl-CoA acetyltransferase, cytosolic 1 OS=Arabidopsis thaliana GN=AAT1 PE=2 SV=1	acetyl-CoA C-acetyltransferase [EC:2.3.1.9]	22.5153	21.8001	Down
		Unigene3878	predicted protein [Populus trichocarpa] >gi|222854731|gb|EEE92278.1| predicted protein [Populus trichocarpa]	Probable acetyl-CoA acetyltransferase, cytosolic 2 OS=Arabidopsis thaliana GN=At5g47720 PE=2 SV=1	acetyl-CoA C-acetyltransferase [EC:2.3.1.9]	28.6862	25.5551	Down
	HMGS (9 unigenes)	CL1833.Contig2	3-hydroxy-3-methylglutaryl coenzyme A synthase [Panax ginseng]	Hydroxymethylglutaryl-CoA synthase OS=Arabidopsis thaliana GN=HMGS PE=1 SV=2	hydroxymethylglutaryl-CoA synthase [EC:2.3.3.10]	69.9772	276.563	Up
		Unigene27531	3-hydroxy-3-methylglutaryl-CoA synthase [Camptotheca acuminata]	Hydroxymethylglutaryl-CoA synthase OS=Arabidopsis thaliana GN=HMGS PE=1 SV=2	hydroxymethylglutaryl-CoA synthase [EC:2.3.3.10]	2.0688	4.4092	Up
		CL1833.Contig3	3-hydroxy-3-methylglutaryl-CoA synthase [Camptotheca acuminata]	Hydroxymethylglutaryl-CoA synthase OS=Arabidopsis thaliana GN=HMGS PE=1 SV=2	hydroxymethylglutaryl-CoA synthase [EC:2.3.3.10]	8.3171	8.2585	Down
		Unigene9014	endo-beta-mannanase [Actinidia arguta]	Mannan endo-1,4-beta-mannosidase 1 OS=Oryza sativa subsp. japonica GN=MAN1 PE=2 SV=2	hydroxymethylglutaryl-CoA synthase [EC:2.3.3.10]	6.372	6.0258	Down
		Unigene9015	endo-beta-mannanase [Actinidia arguta]	Mannan endo-1,4-beta-mannosidase 1 OS=Oryza sativa subsp. japonica GN=MAN1 PE=2 SV=2	hydroxymethylglutaryl-CoA synthase [EC:2.3.3.10]	9.12	8.5403	Down
		CL6450.Contig2	unnamed protein product [Vitis vinifera]	Peroxisome biogenesis protein 3-1 OS=Arabidopsis thaliana GN=PEX3-1 PE=2 SV=2	hydroxymethylglutaryl-CoA synthase [EC:2.3.3.10]	0.1311	0.0671	Down
		Unigene23027	3-hydroxy-3-methylglutaryl-CoA synthase [Camellia sinensis]	Hydroxymethylglutaryl-CoA synthase OS=Arabidopsis thaliana GN=HMGS PE=1 SV=2	hydroxymethylglutaryl-CoA synthase [EC:2.3.3.10]	0.1804	0.0923	Down
		Unigene23030	unnamed protein product [Vitis vinifera]	Hydroxymethylglutaryl-CoA synthase OS=Arabidopsis thaliana GN=HMGS PE=1 SV=2	hydroxymethylglutaryl-CoA synthase [EC:2.3.3.10]	0.1594	0.0815	Down
		CL1833.Contig1	3-hydroxy-3-methylglutaryl coenzyme A synthase [Panax ginseng]	Hydroxymethylglutaryl-CoA synthase OS=Arabidopsis thaliana GN=HMGS PE=1 SV=2	hydroxymethylglutaryl-CoA synthase [EC:2.3.3.10]	18.7177	6.7145	Down
	HMGR (15 unigenes)	Unigene594	3-hydroxy-3-methylglutaryl coenzyme A reductase [Panax quinquefolius]	3-hydroxy-3-methylglutaryl-coenzyme A reductase 1 OS=Solanum tuberosum GN=HMG1 PE=2 SV=1	hydroxymethylglutaryl-CoA reductase (NADPH) [EC:1.1.1.34]	28.009	217.951	Up
		Unigene8430	3-hydroxy-3-methylglutaryl coenzyme A reductase [Panax quinquefolius]	3-hydroxy-3-methylglutaryl-coenzyme A reductase 1 OS=Solanum tuberosum GN=HMG1 PE=2 SV=1	hydroxymethylglutaryl-CoA reductase (NADPH) [EC:1.1.1.34]	5.605	12.2401	Up
		CL11631.Contig3	3-hydroxy-3-methylglutaryl coenzyme A reductase [Eleutherococcus senticosus]	3-hydroxy-3-methylglutaryl-coenzyme A reductase 1 OS=Hevea brasiliensis GN=HMGR1 PE=2 SV=1	hydroxymethylglutaryl-CoA reductase (NADPH) [EC:1.1.1.34]	6.4738	7.0778	Up
		CL11631.Contig3	3-hydroxy-3-methylglutaryl coenzyme A reductase [Eleutherococcus senticosus]	3-hydroxy-3-methylglutaryl-coenzyme A reductase 1 OS=Hevea brasiliensis GN=HMGR1 PE=2 SV=1	hydroxymethylglutaryl-CoA reductase (NADPH) [EC:1.1.1.34]	6.4738	7.0778	Up
		CL11631.Contig2	3-hydroxy-3-methylglutaryl coenzyme A reductase [Eleutherococcus senticosus]	3-hydroxy-3-methylglutaryl-coenzyme A reductase 1 OS=Hevea brasiliensis GN=HMGR1 PE=2 SV=1	hydroxymethylglutaryl-CoA reductase (NADPH) [EC:1.1.1.34]	6.9951	6.4077	Down
		CL11631.Contig2	3-hydroxy-3-methylglutaryl coenzyme A reductase [Eleutherococcus senticosus]	3-hydroxy-3-methylglutaryl-coenzyme A reductase 1 OS=Hevea brasiliensis GN=HMGR1 PE=2 SV=1	hydroxymethylglutaryl-CoA reductase (NADPH) [EC:1.1.1.34]	6.9951	6.4077	Down
		Unigene10745	3-hydroxy-3-methylglutaryl coenzyme A reductase [Eleutherococcus senticosus]	3-hydroxy-3-methylglutaryl-coenzyme A reductase 2 (Fragment) OS=Hevea brasiliensis GN=HMGR2 PE=2 SV=1	hydroxymethylglutaryl-CoA reductase (NADPH) [EC:1.1.1.34]	18.6742	13.9493	Down
		Unigene10745	3-hydroxy-3-methylglutaryl coenzyme A reductase [Eleutherococcus senticosus]	3-hydroxy-3-methylglutaryl-coenzyme A reductase 2 (Fragment) OS=Hevea brasiliensis GN=HMGR2 PE=2 SV=1	hydroxymethylglutaryl-CoA reductase (NADPH) [EC:1.1.1.34]	18.6742	13.9493	Down
		Unigene12275	3-hydroxy-3-methylglutaryl coenzyme A reductase [Panax ginseng]	3-hydroxy-3-methylglutaryl-coenzyme A reductase 1 OS=Arabidopsis thaliana GN=HMG1 PE=1 SV=1	hydroxymethylglutaryl-CoA reductase (NADPH) [EC:1.1.1.34]	12.3314	8.5838	Down
		CL7830.Contig1	3-hydroxy-3-methylglutaryl coenzyme A reductase [Panax ginseng]	3-hydroxy-3-methylglutaryl-coenzyme A reductase 1 OS=Hevea brasiliensis GN=HMGR1 PE=2 SV=1	hydroxymethylglutaryl-CoA reductase (NADPH) [EC:1.1.1.34]	74.8514	51.1428	Down
		CL7830.Contig1	3-hydroxy-3-methylglutaryl coenzyme A reductase [Panax ginseng]	3-hydroxy-3-methylglutaryl-coenzyme A reductase 1 OS=Hevea brasiliensis GN=HMGR1 PE=2 SV=1	hydroxymethylglutaryl-CoA reductase (NADPH) [EC:1.1.1.34]	74.8514	51.1428	Down
		CL11631.Contig5	3-hydroxy-3-methylglutaryl coenzyme A reductase [Panax ginseng]	3-hydroxy-3-methylglutaryl-coenzyme A reductase 1 OS=Hevea brasiliensis GN=HMGR1 PE=2 SV=1	hydroxymethylglutaryl-CoA reductase (NADPH) [EC:1.1.1.34]	21.4769	12.676	Down
		CL11631.Contig5	3-hydroxy-3-methylglutaryl coenzyme A reductase [Panax ginseng]	3-hydroxy-3-methylglutaryl-coenzyme A reductase 1 OS=Hevea brasiliensis GN=HMGR1 PE=2 SV=1	hydroxymethylglutaryl-CoA reductase (NADPH) [EC:1.1.1.34]	21.4769	12.676	Down
		Unigene19060	3-hydroxy-3-methylglutaryl coenzyme A reductase [Panax quinquefolius]	3-hydroxy-3-methylglutaryl-coenzyme A reductase 1 OS=Solanum tuberosum GN=HMG1 PE=2 SV=1	hydroxymethylglutaryl-CoA reductase (NADPH) [EC:1.1.1.34]	8.4453	2.9793	Down
		Unigene26171	3-hydroxy-3-methylglutaryl coenzyme A reductase [Panax quinquefolius]	3-hydroxy-3-methylglutaryl-coenzyme A reductase 1 OS=Solanum tuberosum GN=HMG1 PE=2 SV=1	hydroxymethylglutaryl-CoA reductase (NADPH) [EC:1.1.1.34]	14.9033	2.3258	Down
	MVK (20 unigenes)	CL1632.Contig4	mevalonate kinase [Panax notoginseng]	Mevalonate kinase OS=Arabidopsis thaliana GN=At5g27450 PE=2 SV=1	mevalonate kinase [EC:2.7.1.36]	0.1986	0.6096	Up
		CL1632.Contig2	mevalonate kinase [Panax notoginseng]	Mevalonate kinase OS=Arabidopsis thaliana GN=At5g27450 PE=2 SV=1	mevalonate kinase [EC:2.7.1.36]	1.5712	4.7149	Up
		CL1632.Contig3	mevalonate kinase [Panax notoginseng]	Mevalonate kinase OS=Arabidopsis thaliana GN=At5g27450 PE=2 SV=1	mevalonate kinase [EC:2.7.1.36]	0.6795	1.2165	Up
		Unigene21225	PREDICTED: phosphomevalonate kinase [Vitis vinifera] >gi|297742018|emb|CBI33805.3| unnamed protein product [Vitis vinifera]	125 kDa kinesin-related protein OS=Nicotiana tabacum GN=TKRP125 PE=1 SV=1	phosphomevalonate kinase [EC:2.7.4.2]	2.8644	4.206	Up
		CL1632.Contig1	mevalonate kinase [Panax notoginseng]	Mevalonate kinase OS=Arabidopsis thaliana GN=At5g27450 PE=2 SV=1	mevalonate kinase [EC:2.7.1.36]	6.0694	8.7901	Up
		Unigene22185	5-phosphomevelonate kinase [Hevea brasiliensis]	--	phosphomevalonate kinase [EC:2.7.4.2]	6.4962	8.9656	Up
		Unigene22183	PREDICTED: probable phosphomevalonate kinase-like [Cucumis sativus] >gi|449508038|ref|XP_004163199.1| PREDICTED: probable phosphomevalonate kinase-like [Cucumis sativus]	125 kDa kinesin-related protein OS=Nicotiana tabacum GN=TKRP125 PE=1 SV=1	phosphomevalonate kinase [EC:2.7.4.2]	2.5142	3.441	Up
		Unigene6837	PREDICTED: phosphomevalonate kinase [Vitis vinifera] >gi|297742018|emb|CBI33805.3| unnamed protein product [Vitis vinifera]	--	phosphomevalonate kinase [EC:2.7.4.2]	12.105	15.249	Up
		CL2418.Contig5	PREDICTED: phosphomevalonate kinase [Vitis vinifera] >gi|297742018|emb|CBI33805.3| unnamed protein product [Vitis vinifera]	--	phosphomevalonate kinase [EC:2.7.4.2]	10.8155	13.4148	Up
		CL2418.Contig2	PREDICTED: phosphomevalonate kinase [Vitis vinifera] >gi|297742018|emb|CBI33805.3| unnamed protein product [Vitis vinifera]	125 kDa kinesin-related protein OS=Nicotiana tabacum GN=TKRP125 PE=1 SV=1	phosphomevalonate kinase [EC:2.7.4.2]	5.1987	6.0649	Up
		Unigene22184	PREDICTED: probable phosphomevalonate kinase-like [Cucumis sativus] >gi|449508038|ref|XP_004163199.1| PREDICTED: probable phosphomevalonate kinase-like [Cucumis sativus]	125 kDa kinesin-related protein OS=Nicotiana tabacum GN=TKRP125 PE=1 SV=1	phosphomevalonate kinase [EC:2.7.4.2]	4.1954	4.8414	Up
		Unigene11656	PREDICTED: phosphomevalonate kinase [Vitis vinifera] >gi|297742018|emb|CBI33805.3| unnamed protein product [Vitis vinifera]	125 kDa kinesin-related protein OS=Nicotiana tabacum GN=TKRP125 PE=1 SV=1	phosphomevalonate kinase [EC:2.7.4.2]	2.6438	3.009	Up
		CL2418.Contig3	PREDICTED: probable phosphomevalonate kinase-like [Cucumis sativus] >gi|449508038|ref|XP_004163199.1| PREDICTED: probable phosphomevalonate kinase-like [Cucumis sativus]	125 kDa kinesin-related protein OS=Nicotiana tabacum GN=TKRP125 PE=1 SV=1	phosphomevalonate kinase [EC:2.7.4.2]	2.5726	2.8512	Up
		CL2418.Contig1	PREDICTED: phosphomevalonate kinase [Vitis vinifera] >gi|297742018|emb|CBI33805.3| unnamed protein product [Vitis vinifera]	125 kDa kinesin-related protein OS=Nicotiana tabacum GN=TKRP125 PE=1 SV=1	phosphomevalonate kinase [EC:2.7.4.2]	3.3813	3.4592	Up
		CL2418.Contig4	PREDICTED: phosphomevalonate kinase [Vitis vinifera] >gi|297742018|emb|CBI33805.3| unnamed protein product [Vitis vinifera]	--	phosphomevalonate kinase [EC:2.7.4.2]	7.8093	6.7016	Down
		Unigene8786	PREDICTED: phosphomevalonate kinase [Vitis vinifera] >gi|297742018|emb|CBI33805.3| unnamed protein product [Vitis vinifera]	Ribosomal protein S2, mitochondrial OS=Arabidopsis thaliana GN=RPS2 PE=2 SV=1	phosphomevalonate kinase [EC:2.7.4.2]	19.7437	15.2905	Down
		CL2418.Contig6	PREDICTED: phosphomevalonate kinase [Vitis vinifera] >gi|297742018|emb|CBI33805.3| unnamed protein product [Vitis vinifera]	--	phosphomevalonate kinase [EC:2.7.4.2]	8.0284	5.7405	Down
		Unigene25447	predicted protein [Populus trichocarpa] >gi|222840877|gb|EEE78424.1| predicted protein [Populus trichocarpa]	--	phosphomevalonate kinase [EC:2.7.4.2]	3.3064	1.6913	Down
		Unigene26863	phosphomevalonate kinase [Siraitia grosvenorii]	--	phosphomevalonate kinase [EC:2.7.4.2]	6.1284	2.7586	Down
		Unigene22186	5-phosphomevalonate kinase [Catharanthus roseus]	--	phosphomevalonate kinase [EC:2.7.4.2]	4.9723	1.3387	Down
	PMK (16 unigenes)	Unigene21225	PREDICTED: phosphomevalonate kinase [Vitis vinifera] >gi|297742018|emb|CBI33805.3| unnamed protein product [Vitis vinifera]	125 kDa kinesin-related protein OS=Nicotiana tabacum GN=TKRP125 PE=1 SV=1	phosphomevalonate kinase [EC:2.7.4.2]	2.8644	4.206	Up
		Unigene22185	5-phosphomevelonate kinase [Hevea brasiliensis]	--	phosphomevalonate kinase [EC:2.7.4.2]	6.4962	8.9656	Up
		Unigene22183	PREDICTED: probable phosphomevalonate kinase-like [Cucumis sativus] >gi|449508038|ref|XP_004163199.1| PREDICTED: probable phosphomevalonate kinase-like [Cucumis sativus]	125 kDa kinesin-related protein OS=Nicotiana tabacum GN=TKRP125 PE=1 SV=1	phosphomevalonate kinase [EC:2.7.4.2]	2.5142	3.441	Up
		Unigene6837	PREDICTED: phosphomevalonate kinase [Vitis vinifera] >gi|297742018|emb|CBI33805.3| unnamed protein product [Vitis vinifera]	--	phosphomevalonate kinase [EC:2.7.4.2]	12.105	15.249	Up
		CL2418.Contig5	PREDICTED: phosphomevalonate kinase [Vitis vinifera] >gi|297742018|emb|CBI33805.3| unnamed protein product [Vitis vinifera]	--	phosphomevalonate kinase [EC:2.7.4.2]	10.8155	13.4148	Up
		CL2418.Contig2	PREDICTED: phosphomevalonate kinase [Vitis vinifera] >gi|297742018|emb|CBI33805.3| unnamed protein product [Vitis vinifera]	125 kDa kinesin-related protein OS=Nicotiana tabacum GN=TKRP125 PE=1 SV=1	phosphomevalonate kinase [EC:2.7.4.2]	5.1987	6.0649	Up
		Unigene22184	PREDICTED: probable phosphomevalonate kinase-like [Cucumis sativus] >gi|449508038|ref|XP_004163199.1| PREDICTED: probable phosphomevalonate kinase-like [Cucumis sativus]	125 kDa kinesin-related protein OS=Nicotiana tabacum GN=TKRP125 PE=1 SV=1	phosphomevalonate kinase [EC:2.7.4.2]	4.1954	4.8414	Up
		Unigene11656	PREDICTED: phosphomevalonate kinase [Vitis vinifera] >gi|297742018|emb|CBI33805.3| unnamed protein product [Vitis vinifera]	125 kDa kinesin-related protein OS=Nicotiana tabacum GN=TKRP125 PE=1 SV=1	phosphomevalonate kinase [EC:2.7.4.2]	2.6438	3.009	Up
		CL2418.Contig3	PREDICTED: probable phosphomevalonate kinase-like [Cucumis sativus] >gi|449508038|ref|XP_004163199.1| PREDICTED: probable phosphomevalonate kinase-like [Cucumis sativus]	125 kDa kinesin-related protein OS=Nicotiana tabacum GN=TKRP125 PE=1 SV=1	phosphomevalonate kinase [EC:2.7.4.2]	2.5726	2.8512	Up
		CL2418.Contig1	PREDICTED: phosphomevalonate kinase [Vitis vinifera] >gi|297742018|emb|CBI33805.3| unnamed protein product [Vitis vinifera]	125 kDa kinesin-related protein OS=Nicotiana tabacum GN=TKRP125 PE=1 SV=1	phosphomevalonate kinase [EC:2.7.4.2]	3.3813	3.4592	Up
		CL2418.Contig4	PREDICTED: phosphomevalonate kinase [Vitis vinifera] >gi|297742018|emb|CBI33805.3| unnamed protein product [Vitis vinifera]	--	phosphomevalonate kinase [EC:2.7.4.2]	7.8093	6.7016	Down
		Unigene8786	PREDICTED: phosphomevalonate kinase [Vitis vinifera] >gi|297742018|emb|CBI33805.3| unnamed protein product [Vitis vinifera]	Ribosomal protein S2, mitochondrial OS=Arabidopsis thaliana GN=RPS2 PE=2 SV=1	phosphomevalonate kinase [EC:2.7.4.2]	19.7437	15.2905	Down
		CL2418.Contig6	PREDICTED: phosphomevalonate kinase [Vitis vinifera] >gi|297742018|emb|CBI33805.3| unnamed protein product [Vitis vinifera]	--	phosphomevalonate kinase [EC:2.7.4.2]	8.0284	5.7405	Down
		Unigene25447	predicted protein [Populus trichocarpa] >gi|222840877|gb|EEE78424.1| predicted protein [Populus trichocarpa]	--	phosphomevalonate kinase [EC:2.7.4.2]	3.3064	1.6913	Down
		Unigene26863	phosphomevalonate kinase [Siraitia grosvenorii]	--	phosphomevalonate kinase [EC:2.7.4.2]	6.1284	2.7586	Down
		Unigene22186	5-phosphomevalonate kinase [Catharanthus roseus]	--	phosphomevalonate kinase [EC:2.7.4.2]	4.9723	1.3387	Down
	MDD (2 unigenes)	CL7189.Contig2	mevalonate diphosphate decarboxylase [Panax ginseng]	--	diphosphomevalonate decarboxylase [EC:4.1.1.33]	39.9541	51.3135	Up
		CL7189.Contig1	mevalonate diphosphate decarboxylase [Panax ginseng]	--	diphosphomevalonate decarboxylase [EC:4.1.1.33]	4.7443	3.6601	Down
	IDI (2 unigenes)	CL8109.Contig1	RecName: Full=Isopentenyl-diphosphate Delta-isomerase II; AltName: Full=Isopentenyl pyrophosphate isomerase II; Short=IPP isomerase II >gi|2736288|gb|AAB94133.1| isopentenyl diphosphate isomerase II [Camptotheca acuminata]	Isopentenyl-diphosphate Delta-isomerase II OS=Camptotheca acuminata GN=IPI2 PE=2 SV=1	isopentenyl-diphosphate delta-isomerase [EC:5.3.3.2]	15.5033	16.5101	Up
		CL8109.Contig2	isopentenyl diphosphate isomerase [Bupleurum chinense]	Isopentenyl-diphosphate Delta-isomerase II OS=Camptotheca acuminata GN=IPI2 PE=2 SV=1	isopentenyl-diphosphate delta-isomerase [EC:5.3.3.2]	14.9842	10.7361	Down
Step 2	GPS (24 unigenes)	CL7709.Contig1	geranyl-diphosphate synthase [Hevea brasiliensis]	Heterodimeric geranylgeranyl pyrophosphate synthase small subunit, chloroplastic OS=Arabidopsis thaliana GN=GGR PE=1 SV=2	geranylgeranyl diphosphate synthase, type II [EC:2.5.1.1 2.5.1.10 2.5.1.29]	13.1426	58.7241	Up
		CL7709.Contig2	geranyl-diphosphate synthase [Hevea brasiliensis]	Heterodimeric geranylgeranyl pyrophosphate synthase small subunit, chloroplastic OS=Arabidopsis thaliana GN=GGR PE=1 SV=2	geranylgeranyl diphosphate synthase, type II [EC:2.5.1.1 2.5.1.10 2.5.1.29]	33.5544	116.204	Up
		Unigene17860	geranyl diphosphate synthase [Picrorhiza kurrooa]	Geranylgeranyl pyrophosphate synthase, chloroplastic OS=Catharanthus roseus GN=GGPS1 PE=3 SV=1	geranylgeranyl diphosphate synthase, type II [EC:2.5.1.1 2.5.1.10 2.5.1.29]	8.2256	16.3665	Up
		CL1661.Contig1	geranylgeranyl diphosphate synthase [Corylus avellana]	Geranylgeranyl pyrophosphate synthase, chloroplastic OS=Catharanthus roseus GN=GGPS1 PE=3 SV=1	geranylgeranyl diphosphate synthase, type II [EC:2.5.1.1 2.5.1.10 2.5.1.29]	14.5244	21.3721	Up
		Unigene29526	PREDICTED: uncharacterized protein LOC100853100 [Vitis vinifera]	Glucose-1-phosphate adenylyltransferase large subunit 2, chloroplastic/amyloplastic OS=Solanum tuberosum GN=AGPS2 PE=2 SV=1	glucose-1-phosphate adenylyltransferase [EC:2.7.7.27]	2.0488	2.8446	Up
		Unigene27185	PREDICTED: glucose-1-phosphate adenylyltransferase large subunit 1, chloroplastic-like [Fragaria vesca subsp. vesca]	Glucose-1-phosphate adenylyltransferase large subunit 3, chloroplastic/amyloplastic OS=Solanum tuberosum GN=AGPS3 PE=2 SV=1	glucose-1-phosphate adenylyltransferase [EC:2.7.7.27]	4.0533	5.3562	Up
		CL3564.Contig3	geranyl geranyl pyrophosphate synthase, putative [Ricinus communis] >gi|223530713|gb|EEF32584.1| geranyl geranyl pyrophosphate synthase, putative [Ricinus communis]	Heterodimeric geranylgeranyl pyrophosphate synthase small subunit, chloroplastic OS=Arabidopsis thaliana GN=GGR PE=1 SV=2	geranylgeranyl diphosphate synthase, type II [EC:2.5.1.1 2.5.1.10 2.5.1.29]	0.7337	0.8913	Up
		CL1661.Contig4	geranylgeranyl diphosphate synthase [Corylus avellana]	Geranylgeranyl pyrophosphate synthase, chloroplastic OS=Catharanthus roseus GN=GGPS1 PE=3 SV=1	geranylgeranyl diphosphate synthase, type II [EC:2.5.1.1 2.5.1.10 2.5.1.29]	11.8111	12.7363	Up
		CL3564.Contig2	geranyl geranyl pyrophosphate synthase, putative [Ricinus communis] >gi|223530713|gb|EEF32584.1| geranyl geranyl pyrophosphate synthase, putative [Ricinus communis]	Heterodimeric geranylgeranyl pyrophosphate synthase small subunit, chloroplastic OS=Arabidopsis thaliana GN=GGR PE=1 SV=2	geranylgeranyl diphosphate synthase, type II [EC:2.5.1.1 2.5.1.10 2.5.1.29]	5.4078	5.2876	Down
		Unigene16023	predicted protein [Populus trichocarpa] >gi|222849344|gb|EEE86891.1| predicted protein [Populus trichocarpa]	Heterodimeric geranylgeranyl pyrophosphate synthase small subunit, chloroplastic OS=Arabidopsis thaliana GN=GGR PE=1 SV=2	geranylgeranyl diphosphate synthase, type II [EC:2.5.1.1 2.5.1.10 2.5.1.29]	15.7021	14.0193	Down
		Unigene8944	geranyl pyrophosphate synthase [Solanum lycopersicum] >gi|82659078|gb|ABB88703.1| geranyl pyrophosphate synthase [Solanum lycopersicum]	Solanesyl diphosphate synthase 3, chloroplastic/mitochondrial OS=Arabidopsis thaliana GN=SPS3 PE=1 SV=1	geranyl diphosphate synthase [EC:2.5.1.1]	22.8188	20.0635	Down
		Unigene18194	hypothetical protein PRUPE_ppa008581mg [Prunus persica]	Glucose-1-phosphate adenylyltransferase large subunit 3, chloroplastic/amyloplastic OS=Solanum tuberosum GN=AGPS3 PE=2 SV=1	glucose-1-phosphate adenylyltransferase [EC:2.7.7.27]	6.9997	6.0868	Down
		CL3564.Contig1	geranyl geranyl pyrophosphate synthase, putative [Ricinus communis] >gi|223530713|gb|EEF32584.1| geranyl geranyl pyrophosphate synthase, putative [Ricinus communis]	Heterodimeric geranylgeranyl pyrophosphate synthase small subunit, chloroplastic OS=Arabidopsis thaliana GN=GGR PE=1 SV=2	geranylgeranyl diphosphate synthase, type II [EC:2.5.1.1 2.5.1.10 2.5.1.29]	5.4892	4.7211	Down
		CL3564.Contig5	predicted protein [Populus trichocarpa] >gi|222849344|gb|EEE86891.1| predicted protein [Populus trichocarpa]	Heterodimeric geranylgeranyl pyrophosphate synthase small subunit, chloroplastic OS=Arabidopsis thaliana GN=GGR PE=1 SV=2	geranylgeranyl diphosphate synthase, type II [EC:2.5.1.1 2.5.1.10 2.5.1.29]	2.8142	1.8554	Down
		CL3564.Contig4	geranyl geranyl pyrophosphate synthase, putative [Ricinus communis] >gi|223530713|gb|EEF32584.1| geranyl geranyl pyrophosphate synthase, putative [Ricinus communis]	Heterodimeric geranylgeranyl pyrophosphate synthase small subunit, chloroplastic OS=Arabidopsis thaliana GN=GGR PE=1 SV=2	geranylgeranyl diphosphate synthase, type II [EC:2.5.1.1 2.5.1.10 2.5.1.29]	1.5534	0.9535	Down
		Unigene11900	ADP-glucose pyrophosphorylase large subunit [Solanum lycopersicum] >gi|1840116|gb|AAC49943.1| ADP-glucose pyrophosphorylase large subunit [Solanum lycopersicum]	Glucose-1-phosphate adenylyltransferase large subunit 3, chloroplastic/amyloplastic OS=Solanum tuberosum GN=AGPS3 PE=2 SV=1	glucose-1-phosphate adenylyltransferase [EC:2.7.7.27]	5.1367	3.0805	Down
		Unigene28896	--	Geranylgeranyl pyrophosphate synthase, chloroplastic OS=Capsicum annuum GN=GGPS1 PE=3 SV=1	geranylgeranyl diphosphate synthase, type II [EC:2.5.1.1 2.5.1.10 2.5.1.29]	2.7491	1.5	Down
		CL1110.Contig1	PREDICTED: glucose-1-phosphate adenylyltransferase large subunit 1 [Vitis vinifera]	Glucose-1-phosphate adenylyltransferase large subunit 1 (Fragment) OS=Solanum tuberosum GN=AGPS1 PE=2 SV=1	glucose-1-phosphate adenylyltransferase [EC:2.7.7.27]	47.7557	25.4652	Down
		CL1110.Contig4	hypothetical protein PRUPE_ppa004135mg [Prunus persica]	Glucose-1-phosphate adenylyltransferase large subunit 2, chloroplastic/amyloplastic OS=Solanum tuberosum GN=AGPS2 PE=2 SV=1	glucose-1-phosphate adenylyltransferase [EC:2.7.7.27]	10.5632	4.4209	Down
		CL1661.Contig2	geranyl diphosphate synthase large subunit [Humulus lupulus]	Geranylgeranyl pyrophosphate synthase, chloroplastic OS=Catharanthus roseus GN=GGPS1 PE=3 SV=1	geranylgeranyl diphosphate synthase, type II [EC:2.5.1.1 2.5.1.10 2.5.1.29]	6.602	2.3414	Down
		CL1110.Contig3	unnamed protein product [Vitis vinifera]	Glucose-1-phosphate adenylyltransferase large subunit 1 (Fragment) OS=Solanum tuberosum GN=AGPS1 PE=2 SV=1	glucose-1-phosphate adenylyltransferase [EC:2.7.7.27]	18.3555	5.8575	Down
		CL1110.Contig5	ADP-glucose pyrophosphorylase [Ipomoea batatas]	Glucose-1-phosphate adenylyltransferase large subunit 1 (Fragment) OS=Solanum tuberosum GN=AGPS1 PE=2 SV=1	glucose-1-phosphate adenylyltransferase [EC:2.7.7.27]	22.8018	6.7105	Down
		CL1661.Contig3	geranylgeranyl diphosphate synthase [Corylus avellana]	Geranylgeranyl pyrophosphate synthase, chloroplastic OS=Catharanthus roseus GN=GGPS1 PE=3 SV=1	geranylgeranyl diphosphate synthase, type II [EC:2.5.1.1 2.5.1.10 2.5.1.29]	0.2278	0.0466	Down
		Unigene27358	PREDICTED: glucose-1-phosphate adenylyltransferase large subunit 1 [Vitis vinifera]	Glucose-1-phosphate adenylyltransferase large subunit 2, chloroplastic/amyloplastic OS=Solanum tuberosum GN=AGPS2 PE=2 SV=1	glucose-1-phosphate adenylyltransferase [EC:2.7.7.27]	5.1142	0.8371	Down
	FPS (1 unigenes)	Unigene20008	farnesyl diphosphate synthase [Panax ginseng]	Farnesyl pyrophosphate synthase 1 OS=Parthenium argentatum GN=FPS1 PE=2 SV=1	farnesyl diphosphate synthase [EC:2.5.1.1 2.5.1.10]	148.105	322.956	Up
	GGPPS (14 unigenes)	CL7709.Contig1	geranyl-diphosphate synthase [Hevea brasiliensis]	Heterodimeric geranylgeranyl pyrophosphate synthase small subunit, chloroplastic OS=Arabidopsis thaliana GN=GGR PE=1 SV=2	geranylgeranyl diphosphate synthase, type II [EC:2.5.1.1 2.5.1.10 2.5.1.29]	13.1426	58.7241	Up
		CL7709.Contig2	geranyl-diphosphate synthase [Hevea brasiliensis]	Heterodimeric geranylgeranyl pyrophosphate synthase small subunit, chloroplastic OS=Arabidopsis thaliana GN=GGR PE=1 SV=2	geranylgeranyl diphosphate synthase, type II [EC:2.5.1.1 2.5.1.10 2.5.1.29]	33.5544	116.204	Up
		Unigene17860	geranyl diphosphate synthase [Picrorhiza kurrooa]	Geranylgeranyl pyrophosphate synthase, chloroplastic OS=Catharanthus roseus GN=GGPS1 PE=3 SV=1	geranylgeranyl diphosphate synthase, type II [EC:2.5.1.1 2.5.1.10 2.5.1.29]	8.2256	16.3665	Up
		CL1661.Contig1	geranylgeranyl diphosphate synthase [Corylus avellana]	Geranylgeranyl pyrophosphate synthase, chloroplastic OS=Catharanthus roseus GN=GGPS1 PE=3 SV=1	geranylgeranyl diphosphate synthase, type II [EC:2.5.1.1 2.5.1.10 2.5.1.29]	14.5244	21.3721	Up
		CL3564.Contig3	geranyl geranyl pyrophosphate synthase, putative [Ricinus communis] >gi|223530713|gb|EEF32584.1| geranyl geranyl pyrophosphate synthase, putative [Ricinus communis]	Heterodimeric geranylgeranyl pyrophosphate synthase small subunit, chloroplastic OS=Arabidopsis thaliana GN=GGR PE=1 SV=2	geranylgeranyl diphosphate synthase, type II [EC:2.5.1.1 2.5.1.10 2.5.1.29]	0.7337	0.8913	Up
		CL1661.Contig4	geranylgeranyl diphosphate synthase [Corylus avellana]	Geranylgeranyl pyrophosphate synthase, chloroplastic OS=Catharanthus roseus GN=GGPS1 PE=3 SV=1	geranylgeranyl diphosphate synthase, type II [EC:2.5.1.1 2.5.1.10 2.5.1.29]	11.8111	12.7363	Up
		CL3564.Contig2	geranyl geranyl pyrophosphate synthase, putative [Ricinus communis] >gi|223530713|gb|EEF32584.1| geranyl geranyl pyrophosphate synthase, putative [Ricinus communis]	Heterodimeric geranylgeranyl pyrophosphate synthase small subunit, chloroplastic OS=Arabidopsis thaliana GN=GGR PE=1 SV=2	geranylgeranyl diphosphate synthase, type II [EC:2.5.1.1 2.5.1.10 2.5.1.29]	5.4078	5.2876	Down
		Unigene16023	predicted protein [Populus trichocarpa] >gi|222849344|gb|EEE86891.1| predicted protein [Populus trichocarpa]	Heterodimeric geranylgeranyl pyrophosphate synthase small subunit, chloroplastic OS=Arabidopsis thaliana GN=GGR PE=1 SV=2	geranylgeranyl diphosphate synthase, type II [EC:2.5.1.1 2.5.1.10 2.5.1.29]	15.7021	14.0193	Down
		CL3564.Contig1	geranyl geranyl pyrophosphate synthase, putative [Ricinus communis] >gi|223530713|gb|EEF32584.1| geranyl geranyl pyrophosphate synthase, putative [Ricinus communis]	Heterodimeric geranylgeranyl pyrophosphate synthase small subunit, chloroplastic OS=Arabidopsis thaliana GN=GGR PE=1 SV=2	geranylgeranyl diphosphate synthase, type II [EC:2.5.1.1 2.5.1.10 2.5.1.29]	5.4892	4.7211	Down
		CL3564.Contig5	predicted protein [Populus trichocarpa] >gi|222849344|gb|EEE86891.1| predicted protein [Populus trichocarpa]	Heterodimeric geranylgeranyl pyrophosphate synthase small subunit, chloroplastic OS=Arabidopsis thaliana GN=GGR PE=1 SV=2	geranylgeranyl diphosphate synthase, type II [EC:2.5.1.1 2.5.1.10 2.5.1.29]	2.8142	1.8554	Down
		CL3564.Contig4	geranyl geranyl pyrophosphate synthase, putative [Ricinus communis] >gi|223530713|gb|EEF32584.1| geranyl geranyl pyrophosphate synthase, putative [Ricinus communis]	Heterodimeric geranylgeranyl pyrophosphate synthase small subunit, chloroplastic OS=Arabidopsis thaliana GN=GGR PE=1 SV=2	geranylgeranyl diphosphate synthase, type II [EC:2.5.1.1 2.5.1.10 2.5.1.29]	1.5534	0.9535	Down
		Unigene28896	--	Geranylgeranyl pyrophosphate synthase, chloroplastic OS=Capsicum annuum GN=GGPS1 PE=3 SV=1	geranylgeranyl diphosphate synthase, type II [EC:2.5.1.1 2.5.1.10 2.5.1.29]	2.7491	1.5	Down
		CL1661.Contig2	geranyl diphosphate synthase large subunit [Humulus lupulus]	Geranylgeranyl pyrophosphate synthase, chloroplastic OS=Catharanthus roseus GN=GGPS1 PE=3 SV=1	geranylgeranyl diphosphate synthase, type II [EC:2.5.1.1 2.5.1.10 2.5.1.29]	6.602	2.3414	Down
		CL1661.Contig3	geranylgeranyl diphosphate synthase [Corylus avellana]	Geranylgeranyl pyrophosphate synthase, chloroplastic OS=Catharanthus roseus GN=GGPS1 PE=3 SV=1	geranylgeranyl diphosphate synthase, type II [EC:2.5.1.1 2.5.1.10 2.5.1.29]	0.2278	0.0466	Down
	SS (10 unigenes)	CL4699.Contig5	squalene synthase [Panax ginseng] >gi|41224629|dbj|BAD08242.1| squalene synthase [Panax ginseng]	Squalene synthase OS=Nicotiana benthamiana PE=2 SV=1	farnesyl-diphosphate farnesyltransferase [EC:2.5.1.21]	0	0.1295	Up
		CL4699.Contig6	squalene synthase [Panax ginseng] >gi|41224629|dbj|BAD08242.1| squalene synthase [Panax ginseng]	Squalene synthase OS=Nicotiana benthamiana PE=2 SV=1	farnesyl-diphosphate farnesyltransferase [EC:2.5.1.21]	0	0.1388	Up
		CL4699.Contig10	squalene synthase [Panax ginseng] >gi|41224629|dbj|BAD08242.1| squalene synthase [Panax ginseng]	Squalene synthase OS=Nicotiana benthamiana PE=2 SV=1	farnesyl-diphosphate farnesyltransferase [EC:2.5.1.21]	2.287	10.8256	Up
		CL4699.Contig2	squalene synthase [Panax ginseng]	Squalene synthase OS=Nicotiana benthamiana PE=2 SV=1	farnesyl-diphosphate farnesyltransferase [EC:2.5.1.21]	3.5211	8.9702	Up
		CL4699.Contig4	squalene synthase [Panax ginseng]	Squalene synthase OS=Nicotiana benthamiana PE=2 SV=1	farnesyl-diphosphate farnesyltransferase [EC:2.5.1.21]	3.3386	8.5052	Up
		CL4699.Contig3	squalene synthase [Panax ginseng] >gi|41224629|dbj|BAD08242.1| squalene synthase [Panax ginseng]	Squalene synthase OS=Nicotiana benthamiana PE=2 SV=1	farnesyl-diphosphate farnesyltransferase [EC:2.5.1.21]	4.5405	11.1905	Up
		CL4699.Contig1	squalene synthase [Panax ginseng] >gi|41224629|dbj|BAD08242.1| squalene synthase [Panax ginseng]	Squalene synthase OS=Nicotiana benthamiana PE=2 SV=1	farnesyl-diphosphate farnesyltransferase [EC:2.5.1.21]	5.7863	14.2391	Up
		CL4699.Contig7	squalene synthase [Panax ginseng]	Squalene synthase OS=Nicotiana benthamiana PE=2 SV=1	farnesyl-diphosphate farnesyltransferase [EC:2.5.1.21]	10.6734	25.7983	Up
		CL4699.Contig9	squalene synthase [Panax ginseng] >gi|41224629|dbj|BAD08242.1| squalene synthase [Panax ginseng]	Squalene synthase OS=Nicotiana benthamiana PE=2 SV=1	farnesyl-diphosphate farnesyltransferase [EC:2.5.1.21]	2.4571	4.3787	Up
		CL4699.Contig8	squalene synthase [Panax ginseng]	Squalene synthase OS=Nicotiana benthamiana PE=2 SV=1	farnesyl-diphosphate farnesyltransferase [EC:2.5.1.21]	8.0262	12.8816	Up
	SE (11 unigenes)	CL7088.Contig5	squalene epoxidase [Panax ginseng]	Squalene monooxygenase OS=Panax ginseng PE=2 SV=1	squalene monooxygenase [EC:1.14.13.132]	0.1885	1.3497	Up
		CL7088.Contig2	squalene epoxidase [Panax ginseng]	Squalene monooxygenase OS=Panax ginseng PE=2 SV=1	squalene monooxygenase [EC:1.14.13.132]	7.4814	52.2907	Up
		CL7088.Contig3	RecName: Full=Squalene monooxygenase; AltName: Full=Squalene epoxidase; Short=SE >gi|2804278|dbj|BAA24448.1| squalene epoxidase [Panax ginseng]	Squalene monooxygenase OS=Panax ginseng PE=2 SV=1	squalene monooxygenase [EC:1.14.13.132]	27.0392	170.085	Up
		CL10797.Contig3	squalene epoxidase [Camellia oleifera]	Squalene monooxygenase OS=Panax ginseng PE=2 SV=1	squalene monooxygenase [EC:1.14.13.132]	0.0676	0.3456	Up
		CL10797.Contig4	squalene epoxidase [Camellia oleifera]	Squalene monooxygenase OS=Panax ginseng PE=2 SV=1	squalene monooxygenase [EC:1.14.13.132]	0.9524	1.3533	Up
		CL10797.Contig1	squalene epoxidase [Camellia oleifera]	Squalene monooxygenase OS=Panax ginseng PE=2 SV=1	squalene monooxygenase [EC:1.14.13.132]	1.3056	1.6325	Up
		Unigene23062	squalene epoxidase [Camellia oleifera]	Squalene monooxygenase OS=Panax ginseng PE=2 SV=1	squalene monooxygenase [EC:1.14.13.132]	3.5863	3.6689	Up
		Unigene13384	squalene epoxidase [Camellia oleifera]	Squalene monooxygenase OS=Panax ginseng PE=2 SV=1	squalene monooxygenase [EC:1.14.13.132]	8.1897	6.8029	Down
		CL7088.Contig4	squalene epoxidase [Camellia oleifera]	Squalene monooxygenase OS=Panax ginseng PE=2 SV=1	squalene monooxygenase [EC:1.14.13.132]	8.2997	6.493	Down
		CL10797.Contig2	squalene epoxidase [Camellia oleifera]	Squalene monooxygenase OS=Panax ginseng PE=2 SV=1	squalene monooxygenase [EC:1.14.13.132]	0.0662	0	Down
		CL10797.Contig5	squalene epoxidase [Camellia oleifera]	Squalene monooxygenase OS=Panax ginseng PE=2 SV=1	squalene monooxygenase [EC:1.14.13.132]	0.0521	0	Down
Step 3	DDS (1 unigenes)	Unigene4982	dammarenediol synthase protein [Panax ginseng]	Dammarenediol II synthase OS=Panax ginseng GN=PNA PE=1 SV=1	beta-amyrin synthase [EC:5.4.99.39]	58.7634	471.426	Up
	β-AS (9 unigenes)	Unigene4982	dammarenediol synthase protein [Panax ginseng]	Dammarenediol II synthase OS=Panax ginseng GN=PNA PE=1 SV=1	beta-amyrin synthase [EC:5.4.99.39]	58.7634	471.426	Up
		CL4193.Contig2	RecName: Full=Beta-Amyrin Synthase 1 >gi|3688600|dbj|BAA33461.1| beta-Amyrin Synthase [Panax ginseng]	Beta-Amyrin Synthase 1 OS=Panax ginseng GN=OSCPNY1 PE=1 SV=1	beta-amyrin synthase [EC:5.4.99.39]	1.5075	3.915	Up
		Unigene19203	beta-amyrin synthase [Aralia elata]	Beta-Amyrin Synthase 1 OS=Panax ginseng GN=OSCPNY1 PE=1 SV=1	beta-amyrin synthase [EC:5.4.99.39]	12.1488	4.7992	Down
		CL11465.Contig1	RecName: Full=Beta-Amyrin Synthase 1 >gi|3688600|dbj|BAA33461.1| beta-Amyrin Synthase [Panax ginseng]	Beta-Amyrin Synthase 1 OS=Panax ginseng GN=OSCPNY1 PE=1 SV=1	beta-amyrin synthase [EC:5.4.99.39]	8.2997	2.9167	Down
		Unigene13280	RecName: Full=Beta-Amyrin Synthase 1 >gi|3688600|dbj|BAA33461.1| beta-Amyrin Synthase [Panax ginseng]	Beta-Amyrin Synthase 1 OS=Panax ginseng GN=OSCPNY1 PE=1 SV=1	beta-amyrin synthase [EC:5.4.99.39]	11.6421	3.8159	Down
		Unigene16874	RecName: Full=Beta-Amyrin Synthase 1 >gi|3688600|dbj|BAA33461.1| beta-Amyrin Synthase [Panax ginseng]	Beta-Amyrin Synthase 1 OS=Panax ginseng GN=OSCPNY1 PE=1 SV=1	beta-amyrin synthase [EC:5.4.99.39]	12.328	3.3342	Down
		Unigene28487	RecName: Full=Beta-Amyrin Synthase 2 >gi|3721856|dbj|BAA33722.1| beta-Amyrin Synthase [Panax ginseng]	Beta-Amyrin Synthase 2 OS=Panax ginseng GN=OSCPNY2 PE=2 SV=1	beta-amyrin synthase [EC:5.4.99.39]	4.0957	0.4656	Down
		Unigene25069	RecName: Full=Beta-Amyrin Synthase 2 >gi|3721856|dbj|BAA33722.1| beta-Amyrin Synthase [Panax ginseng]	Beta-Amyrin Synthase 2 OS=Panax ginseng GN=OSCPNY2 PE=2 SV=1	beta-amyrin synthase [EC:5.4.99.39]	3.789	0.2153	Down
		CL4193.Contig1	RecName: Full=Beta-Amyrin Synthase 2 >gi|3721856|dbj|BAA33722.1| beta-Amyrin Synthase [Panax ginseng]	Beta-Amyrin Synthase 2 OS=Panax ginseng GN=OSCPNY2 PE=2 SV=1	beta-amyrin synthase [EC:5.4.99.39]	9.0468	0.2892	Down
	CAS (17 unigenes)	CL6370.Contig1	RecName: Full=Cycloartenol Synthase >gi|3688598|dbj|BAA33460.1| Cycloartenol Synthase [Panax ginseng]	Cycloartenol Synthase OS=Panax ginseng GN=OSCPNX1 PE=1 SV=1	cycloartenol synthase [EC:5.4.99.8]	8.8563	9.604	Up
		CL6370.Contig3	cycloartenol synthase [Panax notoginseng]	Cycloartenol Synthase OS=Panax ginseng GN=OSCPNX1 PE=1 SV=1	cycloartenol synthase [EC:5.4.99.8]	1.4872	0.8344	Down
		Unigene20227	RecName: Full=Cycloartenol Synthase >gi|3688598|dbj|BAA33460.1| Cycloartenol Synthase [Panax ginseng]	Cycloartenol Synthase OS=Panax ginseng GN=OSCPNX1 PE=1 SV=1	cycloartenol synthase [EC:5.4.99.8]	6.2654	2.9135	Down
		CL6370.Contig5	cycloartenol synthase [Panax notoginseng]	Cycloartenol Synthase OS=Panax ginseng GN=OSCPNX1 PE=1 SV=1	cycloartenol synthase [EC:5.4.99.8]	2.0618	0.8906	Down
		CL6370.Contig2	cycloartenol synthase [Panax notoginseng]	Cycloartenol Synthase OS=Panax ginseng GN=OSCPNX1 PE=1 SV=1	cycloartenol synthase [EC:5.4.99.8]	10.0028	4.2504	Down
		CL6370.Contig4	cycloartenol synthase [Panax notoginseng]	Cycloartenol Synthase OS=Panax ginseng GN=OSCPNX1 PE=1 SV=1	cycloartenol synthase [EC:5.4.99.8]	1.4974	0.5106	Down
		CL6370.Contig6	RecName: Full=Cycloartenol Synthase >gi|3688598|dbj|BAA33460.1| Cycloartenol Synthase [Panax ginseng]	Cycloartenol Synthase OS=Panax ginseng GN=OSCPNX1 PE=1 SV=1	cycloartenol synthase [EC:5.4.99.8]	8.524	2.5243	Down
		CL6370.Contig7	cycloartenol synthase [Panax notoginseng]	Cycloartenol Synthase OS=Panax ginseng GN=OSCPNX1 PE=1 SV=1	cycloartenol synthase [EC:5.4.99.8]	6.2247	1.651	Down
		CL7809.Contig1	Oxidosqualene Cyclase [Panax ginseng]	Lanosterol synthase OS=Arabidopsis thaliana GN=LAS1 PE=2 SV=1	cycloartenol synthase [EC:5.4.99.8]	0.5781	0.1479	Down
		Unigene26377	Oxidosqualene Cyclase [Panax ginseng]	Cycloartenol synthase OS=Luffa cylindrica GN=CAS1 PE=1 SV=1	cycloartenol synthase [EC:5.4.99.8]	11.2447	2.7694	Down
		Unigene28092	Oxidosqualene Cyclase [Panax ginseng]	Cycloartenol synthase OS=Oryza sativa subsp. japonica GN=Os02g0139700 PE=1 SV=1	cycloartenol synthase [EC:5.4.99.8]	5.1873	1.0614	Down
		Unigene22747	Oxidosqualene Cyclase [Panax ginseng]	Cycloartenol synthase OS=Ricinus communis PE=1 SV=1	cycloartenol synthase [EC:5.4.99.8]	5.3546	1.0956	Down
		Unigene25627	Oxidosqualene Cyclase [Panax ginseng]	Cycloartenol synthase OS=Betula platyphylla GN=CASBPX1 PE=1 SV=1	cycloartenol synthase [EC:5.4.99.8]	3.8391	0.7855	Down
		Unigene26378	Oxidosqualene Cyclase [Panax ginseng]	Cycloartenol synthase OS=Arabidopsis thaliana GN=CAS1 PE=1 SV=2	cycloartenol synthase [EC:5.4.99.8]	10.5632	1.8011	Down
		Unigene26376	Oxidosqualene Cyclase [Panax ginseng]	Cycloartenol synthase 2 OS=Betula platyphylla GN=CASBPX2 PE=1 SV=1	cycloartenol synthase [EC:5.4.99.8]	10.5342	1.6329	Down
		Unigene25626	Oxidosqualene Cyclase [Panax ginseng]	Cycloartenol Synthase OS=Panax ginseng GN=OSCPNX1 PE=1 SV=1	cycloartenol synthase [EC:5.4.99.8]	3.5974	0.552	Down
		CL7809.Contig2	Oxidosqualene Cyclase [Panax ginseng]	Lanosterol synthase OS=Arabidopsis thaliana GN=LAS1 PE=2 SV=1	cycloartenol synthase [EC:5.4.99.8]	1.9412	0.2837	Down
	LS (2 unigenes)	CL7809.Contig1	Oxidosqualene Cyclase [Panax ginseng]	Lanosterol synthase OS=Arabidopsis thaliana GN=LAS1 PE=2 SV=1	cycloartenol synthase [EC:5.4.99.8]	0.5781	0.1479	Down
		CL7809.Contig2	Oxidosqualene Cyclase [Panax ginseng]	Lanosterol synthase OS=Arabidopsis thaliana GN=LAS1 PE=2 SV=1	cycloartenol synthase [EC:5.4.99.8]	1.9412	0.2837	Down
	P450 (335 unigenes)	CL3623.Contig1	cytochrome P450 CYP707A67 [Bupleurum chinense]	Abscisic acid 8'-hydroxylase 1 OS=Arabidopsis thaliana GN=CYP707A1 PE=2 SV=1	(+)-abscisic acid 8'-hydroxylase [EC:1.14.13.93]	0	0.0407	Up
		CL3623.Contig2	cytochrome P450 CYP707A67 [Bupleurum chinense]	Abscisic acid 8'-hydroxylase 1 OS=Arabidopsis thaliana GN=CYP707A1 PE=2 SV=1	(+)-abscisic acid 8'-hydroxylase [EC:1.14.13.93]	0	0.039	Up
		CL3623.Contig3	cytochrome P450 CYP707A67 [Bupleurum chinense]	Abscisic acid 8'-hydroxylase 1 OS=Arabidopsis thaliana GN=CYP707A1 PE=2 SV=1	(+)-abscisic acid 8'-hydroxylase [EC:1.14.13.93]	0	0.0438	Up
		CL3623.Contig4	cytochrome P450 CYP707A67 [Bupleurum chinense]	Abscisic acid 8'-hydroxylase 1 OS=Arabidopsis thaliana GN=CYP707A1 PE=2 SV=1	(+)-abscisic acid 8'-hydroxylase [EC:1.14.13.93]	0	0.0418	Up
		CL3623.Contig8	cytochrome P450 CYP707A67 [Bupleurum chinense]	Abscisic acid 8'-hydroxylase 1 OS=Arabidopsis thaliana GN=CYP707A1 PE=2 SV=1	(+)-abscisic acid 8'-hydroxylase [EC:1.14.13.93]	0	0.0542	Up
		Unigene27605	putative cytochrome P450 72A, partial [Aralia elata]	Secologanin synthase OS=Catharanthus roseus GN=CYP72A1 PE=2 SV=1	cytochrome P450, family 72, subfamily C, polypeptide 1	0	0.5095	Up
		Unigene32937	cytochrome P450 [Panax ginseng]	Flavonoid 3',5'-hydroxylase OS=Solanum melongena GN=CYP75A2 PE=2 SV=1	ferulate-5-hydroxylase [EC:1.14.-.-]	2.5563	66.5685	Up
		Unigene32018	PREDICTED: cytochrome P450 94A1-like [Vitis vinifera]	Cytochrome P450 94A2 OS=Vicia sativa GN=CYP94A2 PE=2 SV=1	cytochrome P450, family 94, subfamily A, polypeptide 1 (fatty acid omega-hydroxylase) [EC:1.14.-.-]	0.1868	4.7778	Up
		Unigene23026	PREDICTED: cytochrome P450 71A1-like [Glycine max]	Cytochrome P450 71A1 OS=Persea americana GN=CYP71A1 PE=1 SV=2	ferulate-5-hydroxylase [EC:1.14.-.-]	8.2997	162.498	Up
		CL10151.Contig1	cytochrome P450 [Panax ginseng]	Cytochrome P450 71A1 OS=Persea americana GN=CYP71A1 PE=1 SV=2	ferulate-5-hydroxylase [EC:1.14.-.-]	1.7182	28.6144	Up
		CL6819.Contig2	cytochrome P450 CYP716A52v2 [Panax ginseng]	Cytochrome P450 716B2 OS=Picea sitchensis GN=CYP716B2 PE=2 SV=1	(+)-abscisic acid 8'-hydroxylase [EC:1.14.13.93]	0.0382	0.4692	Up
		Unigene16345	cytochrome P450 [Panax notoginseng]	Allene oxide synthase, chloroplastic OS=Arabidopsis thaliana GN=CYP74A PE=1 SV=3	hydroperoxide dehydratase [EC:4.2.1.92]	15.7046	180.581	Up
		Unigene31198	cytochrome P450, putative [Ricinus communis] >gi|223549423|gb|EEF50911.1| cytochrome P450, putative [Ricinus communis]	--	[EC:1.14.-.-]	0.2677	2.739	Up
		CL3623.Contig9	cytochrome P450 CYP707A67 [Bupleurum chinense]	Abscisic acid 8'-hydroxylase 1 OS=Arabidopsis thaliana GN=CYP707A1 PE=2 SV=1	(+)-abscisic acid 8'-hydroxylase [EC:1.14.13.93]	0.0502	0.3596	Up
		Unigene32017	cytochrome P450, putative [Ricinus communis] >gi|223550311|gb|EEF51798.1| cytochrome P450, putative [Ricinus communis]	Cytochrome P450 94A1 OS=Vicia sativa GN=CYP94A1 PE=2 SV=2	cytochrome P450, family 94, subfamily A, polypeptide 1 (fatty acid omega-hydroxylase) [EC:1.14.-.-]	0.4903	3.511	Up
		CL3623.Contig13	cytochrome P450 CYP707A67 [Bupleurum chinense]	Abscisic acid 8'-hydroxylase 1 OS=Arabidopsis thaliana GN=CYP707A1 PE=2 SV=1	(+)-abscisic acid 8'-hydroxylase [EC:1.14.13.93]	0.0856	0.569	Up
		CL808.Contig2	cytochrome P450 [Panax notoginseng]	--	hydroperoxide lyase [EC:4.1.2.-]	5.9526	35.8079	Up
		CL2605.Contig1	cytochrome P450 [Panax notoginseng]	Cytochrome P450 94A1 OS=Vicia sativa GN=CYP94A1 PE=2 SV=2	cytochrome P450, family 94, subfamily A, polypeptide 1 (fatty acid omega-hydroxylase) [EC:1.14.-.-]	4.3382	23.1496	Up
		CL3371.Contig4	cytochrome P450 [Panax ginseng]	Cytochrome P450 71A1 OS=Persea americana GN=CYP71A1 PE=1 SV=2	ferulate-5-hydroxylase [EC:1.14.-.-]	72.8137	370.041	Up
		CL5436.Contig1	PREDICTED: cytochrome P450 81D1-like [Solanum lycopersicum]	Cytochrome P450 81D1 OS=Arabidopsis thaliana GN=CYP81D1 PE=2 SV=1	[EC:1.14.-.-]	30.6842	152.954	Up
		Unigene9716	cytochrome P450 [Panax notoginseng]	Allene oxide synthase OS=Parthenium argentatum GN=CYP74A2 PE=1 SV=2	hydroperoxide lyase [EC:4.1.2.-]	6.8678	33.9907	Up
		CL915.Contig2	cytochrome P450 [Panax notoginseng]	Cytochrome P450 716B2 OS=Picea sitchensis GN=CYP716B2 PE=2 SV=1	(+)-abscisic acid 8'-hydroxylase [EC:1.14.13.93]	17.554	86.3283	Up
		Unigene557	PREDICTED: cytochrome P450 734A1-like [Glycine max]	Cytochrome P450 734A2 OS=Oryza sativa subsp. japonica GN=CYP734A2 PE=2 SV=1	cytochrome P450, family 734, subfamily A, polypeptide 1 (PHYB activation tagged suppressor 1) [EC:1.14.-.-]	4.7141	21.7672	Up
		CL7899.Contig1	PREDICTED: cytochrome P450 94A1 [Vitis vinifera]	Cytochrome P450 94A2 OS=Vicia sativa GN=CYP94A2 PE=2 SV=1	cytochrome P450, family 94, subfamily A, polypeptide 1 (fatty acid omega-hydroxylase) [EC:1.14.-.-]	10.3181	45.8372	Up
		CL808.Contig1	cytochrome P450 [Panax notoginseng]	Allene oxide synthase, chloroplastic OS=Linum usitatissimum GN=CYP74A PE=1 SV=1	hydroperoxide lyase [EC:4.1.2.-]	11.2579	49.5592	Up
		CL915.Contig1	cytochrome P450 [Panax notoginseng]	Cytochrome P450 716B2 OS=Picea sitchensis GN=CYP716B2 PE=2 SV=1	(+)-abscisic acid 8'-hydroxylase [EC:1.14.13.93]	41.0396	169.628	Up
		Unigene32160	cytochrome P450, putative [Ricinus communis] >gi|223550311|gb|EEF51798.1| cytochrome P450, putative [Ricinus communis]	Cytochrome P450 94A2 OS=Vicia sativa GN=CYP94A2 PE=2 SV=1	cytochrome P450, family 94, subfamily A, polypeptide 1 (fatty acid omega-hydroxylase) [EC:1.14.-.-]	1.749	7.1572	Up
		CL6819.Contig1	cytochrome P450 [Panax notoginseng]	Cytochrome P450 716B2 OS=Picea sitchensis GN=CYP716B2 PE=2 SV=1	(+)-abscisic acid 8'-hydroxylase [EC:1.14.13.93]	2.007	8.1049	Up
		CL900.Contig1	cytochrome P450 [Panax notoginseng]	Isoflavone 2'-hydroxylase OS=Glycyrrhiza echinata GN=CYP81E1 PE=1 SV=2	[EC:1.14.-.-]	28.3875	108.18	Up
		CL30.Contig1	cytochrome P450 [Panax notoginseng]	Premnaspirodiene oxygenase OS=Hyoscyamus muticus GN=CYP71D55 PE=1 SV=1	cytochrome P450, family 71, subfamily D, polypeptide 9 (flavonoid 6-hydroxylase) [EC:1.14.13.-]	305.013	1145.15	Up
		Unigene31296	cytochrome P450 [Petunia x hybrida]	Cytochrome P450 76A2 OS=Solanum melongena GN=CYP76A2 PE=2 SV=1	[EC:1.14.-.-]	0.9007	3.2252	Up
		CL900.Contig3	cytochrome P450 [Panax notoginseng]	Isoflavone 2'-hydroxylase OS=Glycyrrhiza echinata GN=CYP81E1 PE=1 SV=2	[EC:1.14.-.-]	7.2585	25.884	Up
		Unigene16732	PREDICTED: cytochrome P450 78A4-like [Vitis vinifera]	Cytochrome P450 78A11 OS=Oryza sativa subsp. japonica GN=CYP78A11 PE=1 SV=2	[EC:1.14.-.-]	3.5582	12.3527	Up
		CL7899.Contig2	unnamed protein product [Vitis vinifera]	Cytochrome P450 94A1 OS=Vicia sativa GN=CYP94A1 PE=2 SV=2	[EC:1.14.-.-]	2.2749	7.8771	Up
		Unigene3935	cytochrome P450 [Populus trichocarpa] >gi|222868917|gb|EEF06048.1| cytochrome P450 [Populus trichocarpa]	Cytokinin hydroxylase OS=Arabidopsis thaliana GN=CYP735A1 PE=1 SV=1	cytokinin trans-hydroxylase	12.75	43.4358	Up
		Unigene31415	PREDICTED: cytochrome P450 86B1-like [Solanum lycopersicum]	Cytochrome P450 86B1 OS=Arabidopsis thaliana GN=CYP86B1 PE=2 SV=1	cytochrome P450, family 86, subfamily B, polypeptide 1 (fatty acid omega-hydroxylase) [EC:1.14.-.-]	1.0709	3.5607	Up
		Unigene15875	cytochrome P450 [Populus trichocarpa] >gi|222849833|gb|EEE87380.1| cytochrome P450 [Populus trichocarpa]	Abscisic acid 8'-hydroxylase 2 OS=Arabidopsis thaliana GN=CYP707A2 PE=2 SV=1	(+)-abscisic acid 8'-hydroxylase [EC:1.14.13.93]	2.1089	6.8901	Up
		CL1680.Contig1	PREDICTED: isoflavone 2&apos;-hydroxylase-like [Fragaria vesca subsp. vesca]	Cytochrome P450 81D1 OS=Arabidopsis thaliana GN=CYP81D1 PE=2 SV=1	[EC:1.14.-.-]	87.8126	282.417	Up
		Unigene7273	cytochrome P450 [Panax notoginseng]	Cytochrome P450 71D9 OS=Glycine max GN=CYP71D9 PE=2 SV=1	cytochrome P450, family 71, subfamily D, polypeptide 9 (flavonoid 6-hydroxylase) [EC:1.14.13.-]	19.512	61.6791	Up
		CL8319.Contig2	PREDICTED: cytochrome P450 76A2 [Vitis vinifera]	Probable (S)-N-methylcoclaurine 3'-hydroxylase isozyme 2 OS=Coptis japonica GN=CYP80B2 PE=2 SV=1	[EC:1.14.-.-]	0.088	0.2702	Up
		CL6819.Contig5	cytochrome P450 CYP716A52v2 [Panax ginseng]	Cytochrome P450 716B1 OS=Picea sitchensis GN=CYP716B1 PE=2 SV=1	(+)-abscisic acid 8'-hydroxylase [EC:1.14.13.93]	0.0828	0.2542	Up
		Unigene35047	cytochrome P450 [Populus trichocarpa] >gi|222843873|gb|EEE81420.1| cytochrome P450 [Populus trichocarpa]	Taxadiene 5-alpha hydroxylase OS=Taxus cuspidata PE=1 SV=2	--	0.8671	2.6613	Up
		CL3371.Contig1	cytochrome P450 CYP736A12 [Panax ginseng]	Cytochrome P450 71A1 OS=Persea americana GN=CYP71A1 PE=1 SV=2	ferulate-5-hydroxylase [EC:1.14.-.-]	12.1591	37.2421	Up
		Unigene6750	cytochrome P450 [Panax notoginseng]	Allene oxide synthase, chloroplastic OS=Arabidopsis thaliana GN=CYP74A PE=1 SV=3	hydroperoxide lyase [EC:4.1.2.-]	15.991	48.2072	Up
		CL915.Contig3	cytochrome P450 [Panax notoginseng]	Cytochrome P450 716B2 OS=Picea sitchensis GN=CYP716B2 PE=2 SV=1	(+)-abscisic acid 8'-hydroxylase [EC:1.14.13.93]	2.6327	7.8974	Up
		CL4334.Contig3	cytochrome P450 CYP82D47 [Panax ginseng]	Cytochrome P450 82A3 OS=Glycine max GN=CYP82A3 PE=2 SV=1	[EC:1.14.-.-]	7.4431	21.9272	Up
		Unigene34438	cytochrome P450 monooxygenase CYP72A59 [Medicago truncatula]	Secologanin synthase OS=Catharanthus roseus GN=CYP72A1 PE=2 SV=1	cytochrome P450, family 72, subfamily C, polypeptide 1	1.0237	2.8802	Up
		Unigene15756	cytochrome P450 CYP712F1 [Bupleurum chinense]	Cytochrome P450 93A1 OS=Glycine max GN=CYP93A1 PE=2 SV=1	cytochrome P450, family 93, subfamily A, polypeptide 1 (3,9-dihydroxypterocarpan 6a-monooxygenase) [EC:1.14.13.28]	9.1147	25.4828	Up
		CL85.Contig1	cytochrome P450 CYP707A67 [Bupleurum chinense]	Abscisic acid 8'-hydroxylase 1 OS=Arabidopsis thaliana GN=CYP707A1 PE=2 SV=1	(+)-abscisic acid 8'-hydroxylase [EC:1.14.13.93]	0.7622	2.0794	Up
		Unigene4640	unnamed protein product [Vitis vinifera]	Cytochrome P450 78A11 OS=Oryza sativa subsp. japonica GN=CYP78A11 PE=1 SV=2	[EC:1.14.-.-]	3.9719	10.8128	Up
		Unigene17721	unnamed protein product [Vitis vinifera]	Cytochrome P450 94A1 OS=Vicia sativa GN=CYP94A1 PE=2 SV=2	[EC:1.14.-.-]	3.6248	9.7859	Up
		CL6819.Contig4	cytochrome P450 CYP716A52v2 [Panax ginseng]	Cytochrome P450 716B2 OS=Picea sitchensis GN=CYP716B2 PE=2 SV=1	(+)-abscisic acid 8'-hydroxylase [EC:1.14.13.93]	1.6739	4.511	Up
		CL6819.Contig6	cytochrome P450 CYP716A52v2 [Panax ginseng]	Cytochrome P450 716B2 OS=Picea sitchensis GN=CYP716B2 PE=2 SV=1	cytochrome P450, family 90, subfamily C, polypeptide 1 (3-epi-6-deoxocathasterone 23-monooxygenase) [EC:1.14.13.112]	1.6813	4.2045	Up
		Unigene12408	cytochrome P450 [Panax notoginseng]	Premnaspirodiene oxygenase OS=Hyoscyamus muticus GN=CYP71D55 PE=1 SV=1	cytochrome P450, family 71, subfamily Z, polypeptide 6 (ent-isokaurene C2-hydroxylase) [EC:1.14.13.143]	35.8136	88.3401	Up
		CL4334.Contig1	PREDICTED: cytochrome P450 82A3-like [Vitis vinifera]	Cytochrome P450 82A3 OS=Glycine max GN=CYP82A3 PE=2 SV=1	[EC:1.14.-.-]	3.4013	8.0878	Up
		Unigene31283	PREDICTED: cytochrome P450 94A1-like [Fragaria vesca subsp. vesca]	--	--	1.5289	3.5751	Up
		CL7622.Contig3	PREDICTED: secologanin synthase-like [Solanum lycopersicum]	Secologanin synthase OS=Catharanthus roseus GN=CYP72A1 PE=2 SV=1	cytochrome P450, family 734, subfamily A, polypeptide 1 (PHYB activation tagged suppressor 1) [EC:1.14.-.-]	0.3393	0.7809	Up
		CL1232.Contig7	NADPH cytochrome P450 reductase [Petroselinum crispum]	NADPH--cytochrome P450 reductase OS=Catharanthus roseus GN=CPR PE=2 SV=1	NADPH-ferrihemoprotein reductase [EC:1.6.2.4]	16.3099	36.7395	Up
		CL2605.Contig2	cytochrome P450 [Panax notoginseng]	--	--	3.4975	7.7525	Up
		CL1900.Contig2	ferulate 5-hydroxylase [Camptotheca acuminata]	Cytochrome P450 84A1 OS=Arabidopsis thaliana GN=CYP84A1 PE=2 SV=1	ferulate-5-hydroxylase [EC:1.14.-.-]	0.5211	1.1328	Up
		Unigene9948	PREDICTED: cytochrome P450 86B1-like [Solanum lycopersicum]	Cytochrome P450 86B1 OS=Arabidopsis thaliana GN=CYP86B1 PE=2 SV=1	cytochrome P450, family 96, subfamily A, polypeptide 15 (midchain alkane hydroxylase)	1.7968	3.8807	Up
		Unigene34628	PREDICTED: cytochrome P450 86B1-like [Solanum lycopersicum]	Cytochrome P450 86B1 OS=Arabidopsis thaliana GN=CYP86B1 PE=2 SV=1	cytochrome P450, family 96, subfamily A, polypeptide 15 (midchain alkane hydroxylase)	1.5209	3.2674	Up
		Unigene12669	cytochrome P450, putative [Ricinus communis] >gi|223536987|gb|EEF38624.1| cytochrome P450, putative [Ricinus communis]	Cytochrome P450 86B1 OS=Arabidopsis thaliana GN=CYP86B1 PE=2 SV=1	cytochrome P450, family 86, subfamily B, polypeptide 1 (fatty acid omega-hydroxylase) [EC:1.14.-.-]	2.4275	5.1324	Up
		CL6824.Contig1	cytochrome P450 CYP749A20 [Panax ginseng]	Cytochrome P450 734A1 OS=Arabidopsis thaliana GN=CYP734A1 PE=2 SV=1	cytochrome P450, family 734, subfamily A, polypeptide 1 (PHYB activation tagged suppressor 1) [EC:1.14.-.-]	31.2208	64.1041	Up
		CL1349.Contig2	cytochrome P450 [Ammi majus]	Cytochrome P450 82C4 OS=Arabidopsis thaliana GN=CYP82C4 PE=2 SV=1	[EC:1.14.-.-]	0.2258	0.4621	Up
		Unigene32318	PREDICTED: cytochrome P450 734A1-like [Cucumis sativus] >gi|449505308|ref|XP_004162431.1| PREDICTED: cytochrome P450 734A1-like [Cucumis sativus]	--	cytokinin trans-hydroxylase	2.8066	5.7426	Up
		Unigene32076	hypothetical protein PRUPE_ppa016770mg [Prunus persica]	Cytochrome P450 72C1 OS=Arabidopsis thaliana GN=CYP72C1 PE=2 SV=2	cytochrome P450, family 72, subfamily C, polypeptide 1	1.9366	3.9624	Up
		CL6819.Contig3	cytochrome P450 CYP716A52v2 [Panax ginseng]	Cytochrome P450 716B1 OS=Picea sitchensis GN=CYP716B1 PE=2 SV=1	(+)-abscisic acid 8'-hydroxylase [EC:1.14.13.93]	0.1162	0.2377	Up
		CL8495.Contig1	PREDICTED: cytochrome P450 83B1 [Vitis vinifera]	Cytochrome P450 83B1 OS=Arabidopsis thaliana GN=CYP83B1 PE=1 SV=1	cytochrome P450, family 83, subfamily B, polypeptide 1 [EC:1.14.-.-]	7.5672	15.3745	Up
		Unigene12013	RecName: Full=Geraniol 8-hydroxylase; AltName: Full=Cytochrome P450 76B6; AltName: Full=Geraniol 10-hydroxylase; Short=CrG10H >gi|17065916|emb|CAC80883.1| geraniol 10-hydroxylase [Catharanthus roseus]	Geraniol 8-hydroxylase OS=Catharanthus roseus GN=CYP76B6 PE=1 SV=1	[EC:1.14.-.-]	223.592	433.196	Up
		Unigene30345	NADPH cytochrome P450 reductase [Petroselinum crispum]	NADPH--cytochrome P450 reductase OS=Catharanthus roseus GN=CPR PE=2 SV=1	NADPH-ferrihemoprotein reductase [EC:1.6.2.4]	2.3958	4.616	Up
		CL1900.Contig3	PREDICTED: cytochrome P450 84A1 [Vitis vinifera]	Cytochrome P450 84A1 OS=Arabidopsis thaliana GN=CYP84A1 PE=2 SV=1	ferulate-5-hydroxylase [EC:1.14.-.-]	3.9612	7.5646	Up
		CL1232.Contig5	NADPH cytochrome P450 reductase [Petroselinum crispum]	NADPH--cytochrome P450 reductase OS=Catharanthus roseus GN=CPR PE=2 SV=1	NADPH-ferrihemoprotein reductase [EC:1.6.2.4]	8.2214	15.5982	Up
		Unigene9417	cytochrome P450 [Panax notoginseng]	Cytochrome P450 71B4 OS=Arabidopsis thaliana GN=CYP71B4 PE=2 SV=2	[EC:1.14.-.-]	32.1892	59.637	Up
		Unigene20978	cytochrome P450 CYP707A67 [Bupleurum chinense]	Abscisic acid 8'-hydroxylase 1 OS=Arabidopsis thaliana GN=CYP707A1 PE=2 SV=1	(+)-abscisic acid 8'-hydroxylase [EC:1.14.13.93]	0.6027	1.1098	Up
		Unigene2330	cytochrome P450 [Panax notoginseng]	Premnaspirodiene oxygenase OS=Hyoscyamus muticus GN=CYP71D55 PE=1 SV=1	cytochrome P450, family 71, subfamily Z, polypeptide 6 (ent-isokaurene C2-hydroxylase) [EC:1.14.13.143]	2.652	4.7227	Up
		Unigene6329	cytochrome P450 CYP72A129 [Panax ginseng]	Secologanin synthase OS=Catharanthus roseus GN=CYP72A1 PE=2 SV=1	cytochrome P450, family 72, subfamily C, polypeptide 1	25.2706	43.9752	Up
		CL30.Contig5	cytochrome P450 [Panax notoginseng]	Premnaspirodiene oxygenase OS=Hyoscyamus muticus GN=CYP71D55 PE=1 SV=1	cytochrome P450, family 99, subfamily A, polypeptide 3 (9beta-pimara-7,15-diene oxidase) [EC:1.14.13.144]	2.515	4.3741	Up
		Unigene14970	cytochrome P450-dependent fatty acid hydroxylase [Nicotiana tabacum]	Cytochrome P450 94A1 OS=Vicia sativa GN=CYP94A1 PE=2 SV=2	cytochrome P450, family 94, subfamily A, polypeptide 1 (fatty acid omega-hydroxylase) [EC:1.14.-.-]	144.16	248.165	Up
		Unigene9965	NADPH cytochrome P450 reductase [Petroselinum crispum]	NADPH--cytochrome P450 reductase OS=Catharanthus roseus GN=CPR PE=2 SV=1	NADPH-ferrihemoprotein reductase [EC:1.6.2.4]	8.5586	14.6273	Up
		Unigene10197	cytochrome P450 [Populus trichocarpa] >gi|222869630|gb|EEF06761.1| cytochrome P450 [Populus trichocarpa]	Cytochrome P450 81D1 OS=Arabidopsis thaliana GN=CYP81D1 PE=2 SV=1	[EC:1.14.-.-]	33.2909	56.8889	Up
		CL5933.Contig2	cytochrome P450 CYP72A129 [Panax ginseng]	Secologanin synthase OS=Catharanthus roseus GN=CYP72A1 PE=2 SV=1	cytochrome P450, family 72, subfamily C, polypeptide 1	18.5453	31.6489	Up
		Unigene21081	cytochrome P450-dependent fatty acid hydroxylase [Nicotiana tabacum]	Cytochrome P450 94A2 OS=Vicia sativa GN=CYP94A2 PE=2 SV=1	cytochrome P450, family 94, subfamily A, polypeptide 1 (fatty acid omega-hydroxylase) [EC:1.14.-.-]	201.016	337.116	Up
		Unigene11093	PREDICTED: cytochrome P450 734A1-like [Solanum lycopersicum]	Cytokinin hydroxylase OS=Arabidopsis thaliana GN=CYP735A1 PE=1 SV=1	cytokinin trans-hydroxylase	3.7656	6.1225	Up
		CL10580.Contig2	hypothetical protein PRUPE_ppa024661mg [Prunus persica]	Cytochrome P450 93A3 OS=Glycine max GN=CYP93A3 PE=2 SV=1	cytochrome P450, family 93, subfamily A, polypeptide 1 (3,9-dihydroxypterocarpan 6a-monooxygenase) [EC:1.14.13.28]	0.9386	1.5043	Up
		CL1232.Contig6	NADPH cytochrome P450 reductase [Petroselinum crispum]	NADPH--cytochrome P450 reductase OS=Catharanthus roseus GN=CPR PE=2 SV=1	NADPH-ferrihemoprotein reductase [EC:1.6.2.4]	7.4965	12	Up
		CL1680.Contig2	cytochrome P450, putative [Ricinus communis] >gi|223535777|gb|EEF37439.1| cytochrome P450, putative [Ricinus communis]	Cytochrome P450 81D1 OS=Arabidopsis thaliana GN=CYP81D1 PE=2 SV=1	[EC:1.14.-.-]	5.2244	8.3069	Up
		CL5935.Contig2	cytochrome P450 90A2 [Camellia japonica]	Cytochrome P450 90A1 OS=Arabidopsis thaliana GN=CYP90A1 PE=2 SV=1	cytochrome P450, family 90, subfamily A, polypeptide 1 [EC:1.14.-.-]	21.6177	34.3585	Up
		CL10381.Contig1	cytochrome P450 90A2 [Camellia japonica]	Cytochrome P450 90A1 OS=Arabidopsis thaliana GN=CYP90A1 PE=2 SV=1	cytochrome P450, family 90, subfamily A, polypeptide 1 [EC:1.14.-.-]	14.0594	22.2186	Up
		Unigene20880	hypothetical protein PRUPE_ppa003402mg [Prunus persica]	Cytochrome P450 89A9 OS=Arabidopsis thaliana GN=CYP89A9 PE=2 SV=1	--	11.057	17.0668	Up
		Unigene15462	PREDICTED: xylosyltransferase oxt [Vitis vinifera]	Cytochrome P450 72C1 OS=Arabidopsis thaliana GN=CYP72C1 PE=2 SV=2	cytokinin trans-hydroxylase	0.4053	0.622	Up
		CL7622.Contig2	PREDICTED: LOW QUALITY PROTEIN: secologanin synthase-like [Vitis vinifera]	Secologanin synthase OS=Catharanthus roseus GN=CYP72A1 PE=2 SV=1	cytochrome P450, family 734, subfamily A, polypeptide 1 (PHYB activation tagged suppressor 1) [EC:1.14.-.-]	0.552	0.8471	Up
		Unigene5021	aldehyde 5-hydroxylase [Liquidambar styraciflua]	Cytochrome P450 84A1 OS=Arabidopsis thaliana GN=CYP84A1 PE=2 SV=1	ferulate-5-hydroxylase [EC:1.14.-.-]	2.0749	3.1841	Up
		CL2680.Contig5	cytochrome P450 CYP749A20 [Panax ginseng]	Cytochrome P450 734A1 OS=Arabidopsis thaliana GN=CYP734A1 PE=2 SV=1	cytokinin trans-hydroxylase	4.8851	7.4965	Up
		CL5948.Contig2	cytochrome P450 [Populus trichocarpa] >gi|222852912|gb|EEE90459.1| cytochrome P450 [Populus trichocarpa]	Cytochrome P450 71A1 OS=Persea americana GN=CYP71A1 PE=1 SV=2	ferulate-5-hydroxylase [EC:1.14.-.-]	2.9922	4.5916	Up
		CL4768.Contig1	cytochrome P450 [Panax notoginseng]	Premnaspirodiene oxygenase OS=Hyoscyamus muticus GN=CYP71D55 PE=1 SV=1	cytochrome P450, family 71, subfamily D, polypeptide 9 (flavonoid 6-hydroxylase) [EC:1.14.13.-]	2.2474	3.4317	Up
		Unigene27300	cytochrome P450 [Panax notoginseng]	Premnaspirodiene oxygenase OS=Hyoscyamus muticus GN=CYP71D55 PE=1 SV=1	cytochrome P450, family 71, subfamily D, polypeptide 9 (flavonoid 6-hydroxylase) [EC:1.14.13.-]	3.3623	4.9892	Up
		Unigene18302	cytochrome P450 [Panax notoginseng]	Isoflavone 2'-hydroxylase OS=Glycyrrhiza echinata GN=CYP81E1 PE=1 SV=2	[EC:1.14.-.-]	4.7658	6.9652	Up
		Unigene8420	cytochrome P450 [Panax notoginseng]	Isoflavone 2'-hydroxylase OS=Glycyrrhiza echinata GN=CYP81E1 PE=1 SV=2	[EC:1.14.-.-]	67.543	98.6349	Up
		CL2680.Contig1	cytochrome P450 CYP749A20 [Panax ginseng]	Secologanin synthase OS=Catharanthus roseus GN=CYP72A1 PE=2 SV=1	cytochrome P450, family 734, subfamily A, polypeptide 1 (PHYB activation tagged suppressor 1) [EC:1.14.-.-]	8.7511	12.7452	Up
		Unigene31947	PREDICTED: secologanin synthase-like [Cucumis sativus]	Secologanin synthase OS=Catharanthus roseus GN=CYP72A1 PE=2 SV=1	cytochrome P450, family 72, subfamily C, polypeptide 1	4.2876	6.141	Up
		CL465.Contig2	cytochrome P450 [Panax notoginseng]	Cytochrome P450 750A1 OS=Pinus taeda GN=CYP750A1 PE=2 SV=1	flavonoid 3'-monooxygenase [EC:1.14.13.21]	0.2868	0.4107	Up
		Unigene14693	PREDICTED: cytochrome P450 734A1-like isoform 2 [Fragaria vesca subsp. vesca]	--	--	7.282	10.3649	Up
		CL5948.Contig1	PREDICTED: cytochrome P450 71A1-like [Fragaria vesca subsp. vesca]	Cytochrome P450 84A1 OS=Arabidopsis thaliana GN=CYP84A1 PE=2 SV=1	ferulate-5-hydroxylase [EC:1.14.-.-]	1.7876	2.5146	Up
		Unigene9525	PREDICTED: cytochrome P450 84A1 [Vitis vinifera]	Cytochrome P450 84A1 OS=Arabidopsis thaliana GN=CYP84A1 PE=2 SV=1	ferulate-5-hydroxylase [EC:1.14.-.-]	2.4878	3.4434	Up
		Unigene20012	p-coumaroyl quinate/shikimate 3&apos;-hydroxylase [Lonicera japonica]	Cytochrome P450 98A2 OS=Glycine max GN=CYP98A2 PE=2 SV=1	coumaroylquinate(coumaroylshikimate) 3'-monooxygenase [EC:1.14.13.36]	10.3065	14.0466	Up
		CL4425.Contig3	hypothetical protein PRUPE_ppa004199mg [Prunus persica]	Cytochrome P450 89A2 OS=Arabidopsis thaliana GN=CYP89A2 PE=2 SV=2	[EC:1.14.-.-]	10.6726	14.5307	Up
		Unigene15220	PREDICTED: cytochrome P450 710A1-like [Vitis vinifera]	Cytochrome P450 710A1 OS=Arabidopsis thaliana GN=CYP710A1 PE=1 SV=1	cytochrome P450, family 710, subfamily A	13.9434	18.207	Up
		Unigene15436	cytochrome P450 [Populus trichocarpa] >gi|222841934|gb|EEE79481.1| cytochrome P450 [Populus trichocarpa]	Cytochrome P450 86A2 OS=Arabidopsis thaliana GN=CYP86A2 PE=2 SV=1	cytochrome P450, family 86, subfamily A, polypeptide 2/4/7/8 (fatty acid omega-hydroxylase) [EC:1.14.-.-]	3.9543	5.1345	Up
		Unigene7121	cytochrome P450 CYP72A129 [Panax ginseng]	Secologanin synthase OS=Catharanthus roseus GN=CYP72A1 PE=2 SV=1	cytochrome P450, family 72, subfamily C, polypeptide 1	19.1691	24.6009	Up
		CL1232.Contig4	NADPH cytochrome P450 reductase [Petroselinum crispum]	NADPH--cytochrome P450 reductase OS=Catharanthus roseus GN=CPR PE=2 SV=1	NADPH-ferrihemoprotein reductase [EC:1.6.2.4]	5.1931	6.6409	Up
		Unigene16910	hypothetical protein PRUPE_ppa004271mg [Prunus persica]	Secologanin synthase OS=Catharanthus roseus GN=CYP72A1 PE=2 SV=1	cytochrome P450, family 72, subfamily C, polypeptide 1	3.5274	4.4577	Up
		CL1232.Contig2	NADPH cytochrome P450 reductase [Petroselinum crispum]	NADPH--cytochrome P450 reductase OS=Catharanthus roseus GN=CPR PE=2 SV=1	NADPH-ferrihemoprotein reductase [EC:1.6.2.4]	4.6004	5.8015	Up
		CL1880.Contig4	PREDICTED: cytochrome P450 704C1-like [Vitis vinifera]	--	--	3.4343	4.2942	Up
		CL8456.Contig1	cytochrome P450 [Populus trichocarpa] >gi|222838149|gb|EEE76514.1| cytochrome P450 [Populus trichocarpa]	Cytochrome P450 734A6 OS=Oryza sativa subsp. japonica GN=CYP734A6 PE=2 SV=1	cytochrome P450, family 734, subfamily A, polypeptide 1 (PHYB activation tagged suppressor 1) [EC:1.14.-.-]	5.4255	6.7068	Up
		Unigene407	PREDICTED: cytochrome P450 86A1 [Vitis vinifera]	Cytochrome P450 86A1 OS=Arabidopsis thaliana GN=CYP86A1 PE=1 SV=2	cytochrome P450, family 86, subfamily A, polypeptide 1 (fatty acid omega-hydroxylase) [EC:1.14.-.-]	3.6948	4.562	Up
		Unigene25902	cytochrome P450 [Ammi majus]	Cytochrome P450 82C2 OS=Arabidopsis thaliana GN=CYP82C2 PE=2 SV=2	[EC:1.14.-.-]	18.2837	22.5508	Up
		Unigene13567	cytochrome P450 [Ammi majus]	Cytochrome P450 82A4 OS=Glycine max GN=CYP82A4 PE=2 SV=1	[EC:1.14.-.-]	19.1077	23.5103	Up
		Unigene14268	PREDICTED: cytochrome P450 86B1-like isoform 1 [Solanum lycopersicum] >gi|460407758|ref|XP_004249317.1| PREDICTED: cytochrome P450 86B1-like isoform 2 [Solanum lycopersicum]	Cytochrome P450 86B1 OS=Arabidopsis thaliana GN=CYP86B1 PE=2 SV=1	[EC:1.14.-.-]	2.0173	2.4765	Up
		CL4425.Contig2	hypothetical protein PRUPE_ppa004199mg [Prunus persica]	Cytochrome P450 89A2 OS=Arabidopsis thaliana GN=CYP89A2 PE=2 SV=2	[EC:1.14.-.-]	4.3899	5.3582	Up
		Unigene12917	unnamed protein product [Vitis vinifera]	Cytochrome P450 72C1 OS=Arabidopsis thaliana GN=CYP72C1 PE=2 SV=2	cytochrome P450, family 72, subfamily C, polypeptide 1	3.947	4.7766	Up
		Unigene14084	PREDICTED: cytochrome P450 86A2-like [Glycine max]	Cytochrome P450 86A2 OS=Arabidopsis thaliana GN=CYP86A2 PE=2 SV=1	cytochrome P450, family 86, subfamily A, polypeptide 2/4/7/8 (fatty acid omega-hydroxylase) [EC:1.14.-.-]	4.1498	5.0173	Up
		CL3623.Contig10	cytochrome P450 CYP707A67 [Bupleurum chinense]	Abscisic acid 8'-hydroxylase 3 OS=Arabidopsis thaliana GN=CYP707A3 PE=1 SV=1	(+)-abscisic acid 8'-hydroxylase [EC:1.14.13.93]	4.0248	4.8337	Up
		Unigene21034	cytochrome P450 [Panax notoginseng]	Isoflavone 2'-hydroxylase OS=Glycyrrhiza echinata GN=CYP81E1 PE=1 SV=2	[EC:1.14.-.-]	43.8613	52.3645	Up
		CL4365.Contig2	cytochrome P450 CYP73A100 [Panax ginseng]	Trans-cinnamate 4-monooxygenase OS=Populus kitakamiensis GN=CYP73A16 PE=2 SV=1	trans-cinnamate 4-monooxygenase [EC:1.14.13.11]	13.5954	16.1958	Up
		CL1232.Contig3	NADPH cytochrome P450 reductase [Petroselinum crispum]	NADPH--cytochrome P450 reductase OS=Catharanthus roseus GN=CPR PE=2 SV=1	NADPH-ferrihemoprotein reductase [EC:1.6.2.4]	7.4306	8.8131	Up
		Unigene6713	PREDICTED: protein LUTEIN DEFICIENT 5, chloroplastic-like [Vitis vinifera] >gi|297735311|emb|CBI17673.3| unnamed protein product [Vitis vinifera]	Protein LUTEIN DEFICIENT 5, chloroplastic OS=Arabidopsis thaliana GN=CYP97A3 PE=1 SV=1	cytochrome P450, family 97, subfamily A (beta-ring hydroxylase) [EC:1.14.-.-]	11.2045	13.1609	Up
		Unigene13582	cytochrome P450 [Ammi majus]	Cytochrome P450 98A2 OS=Glycine max GN=CYP98A2 PE=2 SV=1	coumaroylquinate(coumaroylshikimate) 3'-monooxygenase [EC:1.14.13.36]	155.921	181.72	Up
		Unigene21685	NADPH cytochrome P450 reductase [Ammi majus]	NADPH--cytochrome P450 reductase OS=Catharanthus roseus GN=CPR PE=2 SV=1	NADPH-ferrihemoprotein reductase [EC:1.6.2.4]	34.0669	39.3105	Up
		CL808.Contig3	cytochrome P450 [Panax notoginseng]	Allene oxide synthase, chloroplastic OS=Linum usitatissimum GN=CYP74A PE=1 SV=1	hydroperoxide lyase [EC:4.1.2.-]	1.0038	1.1553	Up
		CL9110.Contig1	PREDICTED: cytochrome P450 724B1-like [Fragaria vesca subsp. vesca]	Cytochrome P450 724B1 OS=Oryza sativa subsp. japonica GN=CYP724B1 PE=1 SV=1	cytochrome P450, family 724, subfamily B, polypeptide 1 [EC:1.14.13.-]	2.9794	3.429	Up
		CL5933.Contig1	cytochrome P450 CYP72A129 [Panax ginseng]	Secologanin synthase OS=Catharanthus roseus GN=CYP72A1 PE=2 SV=1	cytochrome P450, family 72, subfamily C, polypeptide 1	6.9819	7.9652	Up
		CL1232.Contig1	NADPH cytochrome P450 reductase [Petroselinum crispum]	NADPH--cytochrome P450 reductase OS=Catharanthus roseus GN=CPR PE=2 SV=1	NADPH-ferrihemoprotein reductase [EC:1.6.2.4]	4.1466	4.7083	Up
		CL1349.Contig3	cytochrome P450 [Ammi majus]	Cytochrome P450 82C4 OS=Arabidopsis thaliana GN=CYP82C4 PE=2 SV=1	[EC:1.14.-.-]	17.2816	19.5777	Up
		Unigene7659	cytochrome P450 [Ammi majus]	Cytochrome P450 82C4 OS=Arabidopsis thaliana GN=CYP82C4 PE=2 SV=1	[EC:1.14.-.-]	13.3468	15.0598	Up
		CL3371.Contig5	cytochrome P450 [Panax ginseng]	Cytochrome P450 750A1 OS=Pinus taeda GN=CYP750A1 PE=2 SV=1	ferulate-5-hydroxylase [EC:1.14.-.-]	14.1912	15.9619	Up
		Unigene12909	unnamed protein product [Vitis vinifera]	Secologanin synthase OS=Catharanthus roseus GN=CYP72A1 PE=2 SV=1	cytochrome P450, family 72, subfamily C, polypeptide 1	0.7803	0.8756	Up
		Unigene16053	cytochrome P450 [Panax notoginseng]	Cytochrome P450 71D7 OS=Solanum chacoense GN=CYP71D7 PE=3 SV=1	cytochrome P450, family 71, subfamily D, polypeptide 9 (flavonoid 6-hydroxylase) [EC:1.14.13.-]	96.4506	107.973	Up
		Unigene14669	cytochrome P450 CYP72A129 [Panax ginseng]	Secologanin synthase OS=Catharanthus roseus GN=CYP72A1 PE=2 SV=1	cytochrome P450, family 72, subfamily C, polypeptide 1	19.1538	21.3853	Up
		CL4425.Contig5	hypothetical protein PRUPE_ppa004199mg [Prunus persica]	Cytochrome P450 89A2 OS=Arabidopsis thaliana GN=CYP89A2 PE=2 SV=2	[EC:1.14.-.-]	0.9209	1.0241	Up
		CL1232.Contig11	NADPH cytochrome P450 reductase [Petroselinum crispum]	NADPH--cytochrome P450 reductase OS=Catharanthus roseus GN=CPR PE=2 SV=1	NADPH-ferrihemoprotein reductase [EC:1.6.2.4]	68.147	75.5	Up
		Unigene3427	PREDICTED: cytochrome P450 750A1-like [Solanum lycopersicum]	Cytochrome P450 71A4 OS=Solanum melongena GN=CYP71A4 PE=2 SV=1	ferulate-5-hydroxylase [EC:1.14.-.-]	3.2838	3.6179	Up
		CL10526.Contig1	cytochrome P450 monooxygenase [Stevia rebaudiana]	Cytochrome P450 716B1 OS=Picea sitchensis GN=CYP716B1 PE=2 SV=1	cytochrome P450, family 90, subfamily C, polypeptide 1 (3-epi-6-deoxocathasterone 23-monooxygenase) [EC:1.14.13.112]	4.5252	4.9281	Up
		Unigene2927	cytochrome P450 CYP736A12 [Panax ginseng]	Cytochrome P450 750A1 OS=Pinus taeda GN=CYP750A1 PE=2 SV=1	ferulate-5-hydroxylase [EC:1.14.-.-]	447.65	486.451	Up
		CL30.Contig2	cytochrome P450 [Panax notoginseng]	Premnaspirodiene oxygenase OS=Hyoscyamus muticus GN=CYP71D55 PE=1 SV=1	cytochrome P450, family 71, subfamily D, polypeptide 9 (flavonoid 6-hydroxylase) [EC:1.14.13.-]	103.765	111.947	Up
		CL1880.Contig3	PREDICTED: cytochrome P450 704C1-like [Vitis vinifera]	Cytochrome P450 704C1 OS=Pinus taeda GN=CYP704C1 PE=2 SV=1	[EC:1.14.-.-]	2.7632	2.9718	Up
		CL4425.Contig6	hypothetical protein PRUPE_ppa004199mg [Prunus persica]	Cytochrome P450 89A2 OS=Arabidopsis thaliana GN=CYP89A2 PE=2 SV=2	[EC:1.14.-.-]	0.8901	0.952	Up
		CL1232.Contig10	NADPH cytochrome P450 reductase [Petroselinum crispum]	NADPH--cytochrome P450 reductase OS=Catharanthus roseus GN=CPR PE=2 SV=1	NADPH-ferrihemoprotein reductase [EC:1.6.2.4]	4.1858	4.446	Up
		CL4884.Contig2	PREDICTED: cytochrome P450 734A1-like [Vitis vinifera]	Cytochrome P450 734A1 OS=Arabidopsis thaliana GN=CYP734A1 PE=2 SV=1	cytochrome P450, family 734, subfamily A, polypeptide 1 (PHYB activation tagged suppressor 1) [EC:1.14.-.-]	6.0327	6.3506	Up
		CL5564.Contig1	Cytochrome P450 likeTBP [Medicago truncatula] >gi|355515735|gb|AES97358.1| Cytochrome P450 likeTBP [Medicago truncatula]	--	--	4833.35	4953.18	Up
		CL4768.Contig4	cytochrome P450 [Panax notoginseng]	Premnaspirodiene oxygenase OS=Hyoscyamus muticus GN=CYP71D55 PE=1 SV=1	cytochrome P450, family 71, subfamily D, polypeptide 9 (flavonoid 6-hydroxylase) [EC:1.14.13.-]	0.5886	0.6022	Up
		CL4768.Contig2	cytochrome P450 [Panax notoginseng]	Premnaspirodiene oxygenase OS=Hyoscyamus muticus GN=CYP71D55 PE=1 SV=1	cytochrome P450, family 71, subfamily D, polypeptide 9 (flavonoid 6-hydroxylase) [EC:1.14.13.-]	0.6293	0.6438	Up
		CL5013.Contig2	chaperone protein DNAj, putative [Ricinus communis] >gi|223529336|gb|EEF31304.1| chaperone protein DNAj, putative [Ricinus communis]	Chaperone protein dnaJ 20, chloroplastic OS=Arabidopsis thaliana GN=ATJ20 PE=2 SV=2	cytochrome P450, family 90, subfamily C, polypeptide 1 (3-epi-6-deoxocathasterone 23-monooxygenase) [EC:1.14.13.112]	3.0774	3.1483	Up
		CL5013.Contig1	PREDICTED: 3-epi-6-deoxocathasterone 23-monooxygenase-like [Fragaria vesca subsp. vesca]	Chaperone protein dnaJ 20, chloroplastic OS=Arabidopsis thaliana GN=ATJ20 PE=2 SV=2	cytochrome P450, family 90, subfamily C, polypeptide 1 (3-epi-6-deoxocathasterone 23-monooxygenase) [EC:1.14.13.112]	13.7205	14.0366	Up
		Unigene18548	cytochrome P450 [Panax notoginseng]	Premnaspirodiene oxygenase OS=Hyoscyamus muticus GN=CYP71D55 PE=1 SV=1	cytochrome P450, family 71, subfamily D, polypeptide 9 (flavonoid 6-hydroxylase) [EC:1.14.13.-]	1.0852	1.1102	Up
		CL6824.Contig2	cytochrome P450 CYP749A20 [Panax ginseng]	Cytochrome P450 734A1 OS=Arabidopsis thaliana GN=CYP734A1 PE=2 SV=1	cytochrome P450, family 734, subfamily A, polypeptide 1 (PHYB activation tagged suppressor 1) [EC:1.14.-.-]	3.6463	3.7303	Up
		CL5933.Contig4	cytochrome P450 CYP72A129 [Panax ginseng]	Secologanin synthase OS=Catharanthus roseus GN=CYP72A1 PE=2 SV=1	cytochrome P450, family 72, subfamily C, polypeptide 1	2.6566	2.7178	Up
		CL2208.Contig2	cytochrome P450 [Panax notoginseng]	Allene oxide synthase, chloroplastic OS=Arabidopsis thaliana GN=CYP74A PE=1 SV=3	hydroperoxide dehydratase [EC:4.2.1.92]	18.6322	19.0091	Up
		CL1349.Contig4	cytochrome P450 [Ammi majus]	Cytochrome P450 82C4 OS=Arabidopsis thaliana GN=CYP82C4 PE=2 SV=1	[EC:1.14.-.-]	9.6151	9.7846	Up
		Unigene10084	unnamed protein product [Vitis vinifera]	Cytochrome P450 94A1 OS=Vicia sativa GN=CYP94A1 PE=2 SV=2	cytochrome P450, family 94, subfamily A, polypeptide 1 (fatty acid omega-hydroxylase) [EC:1.14.-.-]	13.8968	14.1253	Up
		Unigene4154	unnamed protein product [Vitis vinifera]	Cytochrome P450 86A2 OS=Arabidopsis thaliana GN=CYP86A2 PE=2 SV=1	cytochrome P450, family 86, subfamily A, polypeptide 2/4/7/8 (fatty acid omega-hydroxylase) [EC:1.14.-.-]	6.2151	6.2201	Up
		CL6841.Contig1	PREDICTED: UPF0160 protein MYG1, mitochondrial-like [Vitis vinifera]	Cytochrome P450 72C1 OS=Arabidopsis thaliana GN=CYP72C1 PE=2 SV=2	cytokinin trans-hydroxylase	6.3199	6.3097	Down
		CL1232.Contig8	NADPH cytochrome P450 reductase [Petroselinum crispum]	NADPH--cytochrome P450 reductase OS=Catharanthus roseus GN=CPR PE=2 SV=1	NADPH-ferrihemoprotein reductase [EC:1.6.2.4]	5.2679	5.2353	Down
		CL4768.Contig3	cytochrome P450 CYP71D313 [Panax ginseng]	Premnaspirodiene oxygenase OS=Hyoscyamus muticus GN=CYP71D55 PE=1 SV=1	cytochrome P450, family 71, subfamily D, polypeptide 9 (flavonoid 6-hydroxylase) [EC:1.14.13.-]	130.34	128.652	Down
		Unigene13373	unnamed protein product [Vitis vinifera]	Cytochrome P450 86B1 OS=Arabidopsis thaliana GN=CYP86B1 PE=2 SV=1	cytochrome P450, family 86, subfamily B, polypeptide 1 (fatty acid omega-hydroxylase) [EC:1.14.-.-]	3.901	3.8484	Down
		CL3371.Contig2	cytochrome P450 CYP736A12 [Panax ginseng]	Cytochrome P450 71A1 OS=Persea americana GN=CYP71A1 PE=1 SV=2	ferulate-5-hydroxylase [EC:1.14.-.-]	4.3948	4.2768	Down
		CL3623.Contig7	cytochrome P450 CYP707A67 [Bupleurum chinense]	Abscisic acid 8'-hydroxylase 1 OS=Arabidopsis thaliana GN=CYP707A1 PE=2 SV=1	(+)-abscisic acid 8'-hydroxylase [EC:1.14.13.93]	1.0631	1.0237	Down
		CL1232.Contig9	NADPH cytochrome P450 reductase [Petroselinum crispum]	NADPH--cytochrome P450 reductase OS=Catharanthus roseus GN=CPR PE=2 SV=1	NADPH-ferrihemoprotein reductase [EC:1.6.2.4]	4.9166	4.7069	Down
		CL4365.Contig1	cytochrome P450 CYP73A100 [Panax ginseng]	Trans-cinnamate 4-monooxygenase OS=Populus kitakamiensis GN=CYP73A16 PE=2 SV=1	trans-cinnamate 4-monooxygenase [EC:1.14.13.11]	3.138	3.0003	Down
		Unigene30691	PREDICTED: cytochrome P450 734A1-like [Solanum lycopersicum]	Cytochrome P450 734A1 OS=Arabidopsis thaliana GN=CYP734A1 PE=2 SV=1	cytochrome P450, family 734, subfamily A, polypeptide 1 (PHYB activation tagged suppressor 1) [EC:1.14.-.-]	0.5887	0.5559	Down
		CL6371.Contig1	cytochrome P450 CYP71D312 [Panax ginseng]	Premnaspirodiene oxygenase OS=Hyoscyamus muticus GN=CYP71D55 PE=1 SV=1	cytochrome P450, family 71, subfamily Z, polypeptide 6 (ent-isokaurene C2-hydroxylase) [EC:1.14.13.143]	152.721	143.051	Down
		Unigene18957	PREDICTED: cytochrome P450 724B1-like [Vitis vinifera]	Cytochrome P450 724B1 OS=Oryza sativa subsp. japonica GN=CYP724B1 PE=1 SV=1	cytochrome P450, family 724, subfamily B, polypeptide 1 [EC:1.14.13.-]	23.7822	22.2254	Down
		CL30.Contig4	cytochrome P450 [Panax notoginseng]	Amorpha-4,11-diene 12-monooxygenase OS=Artemisia annua GN=CYP71AV1 PE=1 SV=1	cytochrome P450, family 71, subfamily D, polypeptide 9 (flavonoid 6-hydroxylase) [EC:1.14.13.-]	6.9978	6.493	Down
		Unigene30347	NADPH cytochrome P450 reductase [Ammi majus]	NADPH--cytochrome P450 reductase OS=Catharanthus roseus GN=CPR PE=2 SV=1	NADPH-ferrihemoprotein reductase [EC:1.6.2.4]	97.1549	89.737	Down
		Unigene12910	unnamed protein product [Vitis vinifera]	Secologanin synthase OS=Catharanthus roseus GN=CYP72A1 PE=2 SV=1	cytochrome P450, family 72, subfamily C, polypeptide 1	4.1237	3.7444	Down
		CL4425.Contig1	hypothetical protein PRUPE_ppa004199mg [Prunus persica]	Cytochrome P450 89A2 OS=Arabidopsis thaliana GN=CYP89A2 PE=2 SV=2	[EC:1.14.-.-]	15.5367	14.0843	Down
		CL4768.Contig5	cytochrome P450 [Panax notoginseng]	Premnaspirodiene oxygenase OS=Hyoscyamus muticus GN=CYP71D55 PE=1 SV=1	cytochrome P450, family 71, subfamily D, polypeptide 9 (flavonoid 6-hydroxylase) [EC:1.14.13.-]	0.4506	0.4033	Down
		Unigene9574	cytochrome P450, putative [Ricinus communis] >gi|223538000|gb|EEF39613.1| cytochrome P450, putative [Ricinus communis]	Premnaspirodiene oxygenase OS=Hyoscyamus muticus GN=CYP71D55 PE=1 SV=1	cytochrome P450, family 71, subfamily D, polypeptide 9 (flavonoid 6-hydroxylase) [EC:1.14.13.-]	113.832	101.344	Down
		CL1880.Contig2	PREDICTED: cytochrome P450 704C1-like [Vitis vinifera]	Cytochrome P450 704C1 OS=Pinus taeda GN=CYP704C1 PE=2 SV=1	[EC:1.14.-.-]	1.0441	0.9156	Down
		CL5933.Contig3	cytochrome P450 CYP72A129 [Panax ginseng]	Secologanin synthase OS=Catharanthus roseus GN=CYP72A1 PE=2 SV=1	cytochrome P450, family 72, subfamily C, polypeptide 1	35.8242	30.9529	Down
		Unigene19401	NADPH cytochrome P450 reductase [Petroselinum crispum]	NADPH--cytochrome P450 reductase OS=Catharanthus roseus GN=CPR PE=2 SV=1	NADPH-ferrihemoprotein reductase [EC:1.6.2.4]	4.6681	4.0192	Down
		CL7622.Contig1	PREDICTED: LOW QUALITY PROTEIN: secologanin synthase-like [Vitis vinifera]	Secologanin synthase OS=Catharanthus roseus GN=CYP72A1 PE=2 SV=1	cytochrome P450, family 734, subfamily A, polypeptide 1 (PHYB activation tagged suppressor 1) [EC:1.14.-.-]	0.89	0.7648	Down
		Unigene2002	cytochrome P450, putative [Ricinus communis] >gi|223533600|gb|EEF35338.1| cytochrome P450, putative [Ricinus communis]	Cytochrome P450 94A1 OS=Vicia sativa GN=CYP94A1 PE=2 SV=2	[EC:1.14.-.-]	8.9491	7.6866	Down
		CL3946.Contig5	cytochrome P450, putative [Ricinus communis] >gi|223550408|gb|EEF51895.1| cytochrome P450, putative [Ricinus communis]	Cytochrome P450 71A8 OS=Mentha piperita GN=CYP71A8 PE=3 SV=1	[EC:1.14.-.-]	17.0178	14.5558	Down
		CL3371.Contig3	cytochrome P450 [Panax ginseng]	Cytochrome P450 71A1 OS=Persea americana GN=CYP71A1 PE=1 SV=2	ferulate-5-hydroxylase [EC:1.14.-.-]	58.2273	49.7513	Down
		Unigene9296	cytochrome P450 [Populus trichocarpa] >gi|222860845|gb|EEE98387.1| cytochrome P450 [Populus trichocarpa]	Cytochrome P450 704C1 OS=Pinus taeda GN=CYP704C1 PE=2 SV=1	[EC:1.14.-.-]	17.8083	15.1432	Down
		Unigene17740	PREDICTED: cytochrome P450 86A1 [Vitis vinifera]	Cytochrome P450 86A1 OS=Arabidopsis thaliana GN=CYP86A1 PE=1 SV=2	cytochrome P450, family 86, subfamily A, polypeptide 1 (fatty acid omega-hydroxylase) [EC:1.14.-.-]	4.1926	3.5539	Down
		Unigene19399	NADPH cytochrome P450 reductase [Petroselinum crispum]	NADPH--cytochrome P450 reductase OS=Catharanthus roseus GN=CPR PE=2 SV=1	NADPH-ferrihemoprotein reductase [EC:1.6.2.4]	4.5346	3.7668	Down
		Unigene25691	PREDICTED: cytochrome P450 71A1-like [Glycine max]	Cytochrome P450 71A1 OS=Persea americana GN=CYP71A1 PE=1 SV=2	[EC:1.14.-.-]	6.2337	5.1018	Down
		CL6034.Contig1	cytochrome P450 CYP72A129 [Panax ginseng]	Cytochrome P450 72C1 OS=Arabidopsis thaliana GN=CYP72C1 PE=2 SV=2	cytochrome P450, family 734, subfamily A, polypeptide 1 (PHYB activation tagged suppressor 1) [EC:1.14.-.-]	23.217	18.8961	Down
		Unigene9061	cytochrome P450 CYP90D18 [Bupleurum chinense]	3-epi-6-deoxocathasterone 23-monooxygenase OS=Arabidopsis thaliana GN=CYP90D1 PE=2 SV=1	cytochrome P450, family 90, subfamily D, polypeptide 1 (3-epi-6-deoxocathasterone 23-monooxygenase) [EC:1.14.13.112]	3.1054	2.5151	Down
		CL2792.Contig1	PREDICTED: LOW QUALITY PROTEIN: secologanin synthase-like [Vitis vinifera]	Secologanin synthase OS=Catharanthus roseus GN=CYP72A1 PE=2 SV=1	cytochrome P450, family 72, subfamily C, polypeptide 1	11.9105	9.6233	Down
		Unigene12906	unnamed protein product [Vitis vinifera]	Secologanin synthase OS=Catharanthus roseus GN=CYP72A1 PE=2 SV=1	cytochrome P450, family 72, subfamily C, polypeptide 1	7.1264	5.7135	Down
		Unigene30346	NADPH cytochrome P450 reductase [Ammi majus]	NADPH--cytochrome P450 reductase OS=Catharanthus roseus GN=CPR PE=2 SV=1	NADPH-ferrihemoprotein reductase [EC:1.6.2.4]	8.6643	6.9399	Down
		CL429.Contig8	PREDICTED: uncharacterized protein LOC100248387 [Vitis vinifera]	Cytochrome P450 71A9 OS=Glycine max GN=CYP71A9 PE=2 SV=1	cytochrome P450, family 83, subfamily B, polypeptide 1 [EC:1.14.-.-]	2.5335	2.0207	Down
		Unigene19400	NADPH cytochrome P450 reductase [Petroselinum crispum]	NADPH--cytochrome P450 reductase OS=Catharanthus roseus GN=CPR PE=2 SV=1	NADPH-ferrihemoprotein reductase [EC:1.6.2.4]	4.1236	3.2812	Down
		CL4884.Contig3	cytochrome P450, putative [Ricinus communis] >gi|223536227|gb|EEF37879.1| cytochrome P450, putative [Ricinus communis]	Cytochrome P450 734A1 OS=Arabidopsis thaliana GN=CYP734A1 PE=2 SV=1	cytochrome P450, family 734, subfamily A, polypeptide 1 (PHYB activation tagged suppressor 1) [EC:1.14.-.-]	12.2054	9.6563	Down
		CL9110.Contig2	cytochrome P450, putative [Ricinus communis] >gi|223533722|gb|EEF35457.1| cytochrome P450, putative [Ricinus communis]	Cytochrome P450 724B1 OS=Oryza sativa subsp. japonica GN=CYP724B1 PE=1 SV=1	cytochrome P450, family 724, subfamily B, polypeptide 1 [EC:1.14.13.-]	19.9961	15.6215	Down
		Unigene12793	PREDICTED: LOW QUALITY PROTEIN: cytochrome P450 76C4-like [Vitis vinifera]	Cytochrome P450 76C2 OS=Arabidopsis thaliana GN=CYP76C2 PE=2 SV=1	[EC:1.14.-.-]	11.8758	9.2759	Down
		Unigene4237	obtusifoliol 14alpha-demethylase [Solanum lycopersicum] >gi|299735181|gb|ADJ37071.1| obtusifoliol 14alpha-demethylase [Solanum lycopersicum]	--	cytochrome P450, family 51 (sterol 14-demethylase) [EC:1.14.13.70]	42.9348	33.4737	Down
		CL900.Contig2	cytochrome P450 [Panax notoginseng]	Cytochrome P450 81D1 OS=Arabidopsis thaliana GN=CYP81D1 PE=2 SV=1	[EC:1.14.-.-]	13.0264	10.1281	Down
		CL6371.Contig2	cytochrome P450 CYP71D312 [Panax ginseng]	Premnaspirodiene oxygenase OS=Hyoscyamus muticus GN=CYP71D55 PE=1 SV=1	cytochrome P450, family 71, subfamily D, polypeptide 9 (flavonoid 6-hydroxylase) [EC:1.14.13.-]	156.083	120.548	Down
		CL10033.Contig2	cytochrome P450, putative [Ricinus communis] >gi|223539182|gb|EEF40775.1| cytochrome P450, putative [Ricinus communis]	3-epi-6-deoxocathasterone 23-monooxygenase OS=Arabidopsis thaliana GN=ROT3 PE=2 SV=3	cytochrome P450, family 90, subfamily C, polypeptide 1 (3-epi-6-deoxocathasterone 23-monooxygenase) [EC:1.14.13.112]	0.6367	0.4885	Down
		CL1349.Contig1	cytochrome P450 [Ammi majus]	Cytochrome P450 82C4 OS=Arabidopsis thaliana GN=CYP82C4 PE=2 SV=1	[EC:1.14.-.-]	117.595	89.3567	Down
		CL429.Contig10	PREDICTED: uncharacterized protein LOC100248387 [Vitis vinifera]	Cytochrome P450 71A9 OS=Glycine max GN=CYP71A9 PE=2 SV=1	cytochrome P450, family 83, subfamily B, polypeptide 1 [EC:1.14.-.-]	2.8618	2.1319	Down
		CL429.Contig4	PREDICTED: uncharacterized protein LOC100248387 [Vitis vinifera]	Cytochrome P450 71A9 OS=Glycine max GN=CYP71A9 PE=2 SV=1	cytochrome P450, family 83, subfamily B, polypeptide 1 [EC:1.14.-.-]	4.2986	3.1958	Down
		CL429.Contig13	PREDICTED: uncharacterized protein LOC100248387 [Vitis vinifera]	Cytochrome P450 71A9 OS=Glycine max GN=CYP71A9 PE=2 SV=1	cytochrome P450, family 83, subfamily B, polypeptide 1 [EC:1.14.-.-]	2.0778	1.5422	Down
		Unigene12908	unnamed protein product [Vitis vinifera]	Secologanin synthase OS=Catharanthus roseus GN=CYP72A1 PE=2 SV=1	cytochrome P450, family 72, subfamily C, polypeptide 1	0.9922	0.7331	Down
		Unigene17292	unnamed protein product [Vitis vinifera]	Cytochrome P450 87A3 OS=Oryza sativa subsp. japonica GN=CYP87A3 PE=2 SV=3	isocitrate dehydrogenase (NAD+) [EC:1.1.1.41]	34.8768	25.7072	Down
		Unigene8218	cytochrome P450 monooxygenase CYP51G1 [Medicago truncatula]	Sterol 14-demethylase OS=Arabidopsis thaliana GN=CYP51G1 PE=1 SV=1	cytochrome P450, family 51 (sterol 14-demethylase) [EC:1.14.13.70]	31.7441	23.2843	Down
		CL10445.Contig1	Cytochrome P450 [Medicago truncatula] >gi|355512475|gb|AES94098.1| Cytochrome P450 [Medicago truncatula]	Cytochrome P450 87A3 OS=Oryza sativa subsp. japonica GN=CYP87A3 PE=2 SV=3	isocitrate dehydrogenase (NAD+) [EC:1.1.1.41]	1.6875	1.2331	Down
		CL429.Contig5	PREDICTED: uncharacterized protein LOC100248387 [Vitis vinifera]	Cytochrome P450 71A9 OS=Glycine max GN=CYP71A9 PE=2 SV=1	cytochrome P450, family 83, subfamily B, polypeptide 1 [EC:1.14.-.-]	2.2833	1.6654	Down
		CL429.Contig11	PREDICTED: uncharacterized protein LOC100248387 [Vitis vinifera]	Cytochrome P450 71A9 OS=Glycine max GN=CYP71A9 PE=2 SV=1	cytochrome P450, family 83, subfamily B, polypeptide 1 [EC:1.14.-.-]	2.135	1.5542	Down
		CL429.Contig6	PREDICTED: uncharacterized protein LOC100248387 [Vitis vinifera]	Cytochrome P450 71A9 OS=Glycine max GN=CYP71A9 PE=2 SV=1	cytochrome P450, family 83, subfamily B, polypeptide 1 [EC:1.14.-.-]	2.0878	1.5198	Down
		CL429.Contig9	PREDICTED: uncharacterized protein LOC100248387 [Vitis vinifera]	Cytochrome P450 71A9 OS=Glycine max GN=CYP71A9 PE=2 SV=1	cytochrome P450, family 83, subfamily B, polypeptide 1 [EC:1.14.-.-]	2.0303	1.4779	Down
		CL429.Contig12	PREDICTED: uncharacterized protein LOC100248387 [Vitis vinifera]	Cytochrome P450 71A9 OS=Glycine max GN=CYP71A9 PE=2 SV=1	cytochrome P450, family 83, subfamily B, polypeptide 1 [EC:1.14.-.-]	2.4261	1.7199	Down
		Unigene19398	NADPH cytochrome P450 reductase [Petroselinum crispum]	NADPH--cytochrome P450 reductase OS=Catharanthus roseus GN=CPR PE=2 SV=1	NADPH-ferrihemoprotein reductase [EC:1.6.2.4]	3.7242	2.5718	Down
		Unigene18355	cytochrome P450 [Populus trichocarpa] >gi|222850525|gb|EEE88072.1| cytochrome P450 [Populus trichocarpa]	--	cytochrome P450, family 86, subfamily A, polypeptide 1 (fatty acid omega-hydroxylase) [EC:1.14.-.-]	5.755	3.925	Down
		CL4272.Contig2	cytochrome P450 [Populus trichocarpa] >gi|222860844|gb|EEE98386.1| cytochrome P450 [Populus trichocarpa]	Cytochrome P450 704C1 OS=Pinus taeda GN=CYP704C1 PE=2 SV=1	cytochrome P450, family 86, subfamily A, polypeptide 2/4/7/8 (fatty acid omega-hydroxylase) [EC:1.14.-.-]	2.9709	2.0262	Down
		CL11163.Contig2	cytochrome P450, putative [Ricinus communis] >gi|223539281|gb|EEF40874.1| cytochrome P450, putative [Ricinus communis]	Cytochrome P450 90B1 OS=Arabidopsis thaliana GN=CYP90B1 PE=1 SV=2	cytochrome P450, family 90, subfamily B, polypeptide 1 (steroid 22-alpha-hydroxylase) [EC:1.14.13.-]	0.4458	0.304	Down
		Unigene18738	PREDICTED: cytochrome P450 716B1-like [Fragaria vesca subsp. vesca]	Taxadiene 5-alpha hydroxylase OS=Taxus cuspidata PE=1 SV=2	cytochrome P450, family 90, subfamily A, polypeptide 1 [EC:1.14.-.-]	7.4899	5.0738	Down
		CL9542.Contig2	obtusifoliol 14alpha-demethylase [Solanum chacoense]	Sterol 14-demethylase OS=Arabidopsis thaliana GN=CYP51G1 PE=1 SV=1	cytochrome P450, family 51 (sterol 14-demethylase) [EC:1.14.13.70]	74.1809	50.1974	Down
		Unigene16900	cytochrome P450 CYP90D18 [Bupleurum chinense]	3-epi-6-deoxocathasterone 23-monooxygenase OS=Arabidopsis thaliana GN=CYP90D1 PE=2 SV=1	cytochrome P450, family 90, subfamily D, polypeptide 1 (3-epi-6-deoxocathasterone 23-monooxygenase) [EC:1.14.13.112]	5.3168	3.5602	Down
		CL1900.Contig1	ferulate 5-hydroxylase [Camptotheca acuminata]	Cytochrome P450 84A1 OS=Arabidopsis thaliana GN=CYP84A1 PE=2 SV=1	ferulate-5-hydroxylase [EC:1.14.-.-]	1.0187	0.6724	Down
		Unigene11052	cytochrome P450 CYP749A20 [Panax ginseng]	Secologanin synthase OS=Catharanthus roseus GN=CYP72A1 PE=2 SV=1	cytochrome P450, family 734, subfamily A, polypeptide 1 (PHYB activation tagged suppressor 1) [EC:1.14.-.-]	15.1305	9.9203	Down
		CL10381.Contig2	cytochrome P450 90A2 [Camellia japonica]	Cytochrome P450 90A1 OS=Arabidopsis thaliana GN=CYP90A1 PE=2 SV=1	cytochrome P450, family 90, subfamily A, polypeptide 1 [EC:1.14.-.-]	7.8915	5.1502	Down
		CL2091.Contig1	hypothetical protein PRUPE_ppa026124mg [Prunus persica]	Cytochrome P450 704C1 OS=Pinus taeda GN=CYP704C1 PE=2 SV=1	cytochrome P450, family 86, subfamily B, polypeptide 1 (fatty acid omega-hydroxylase) [EC:1.14.-.-]	16.8649	11.0042	Down
		CL485.Contig1	PREDICTED: cytochrome P450 704C1-like [Vitis vinifera]	Cytochrome P450 704C1 OS=Pinus taeda GN=CYP704C1 PE=2 SV=1	cytochrome P450, family 86, subfamily B, polypeptide 1 (fatty acid omega-hydroxylase) [EC:1.14.-.-]	1.4781	0.9533	Down
		CL429.Contig7	PREDICTED: uncharacterized protein LOC100248387 [Vitis vinifera]	Cytochrome P450 71A9 OS=Glycine max GN=CYP71A9 PE=2 SV=1	cytochrome P450, family 83, subfamily B, polypeptide 1 [EC:1.14.-.-]	9.1712	5.8692	Down
		Unigene1642	PREDICTED: secologanin synthase isoform 1 [Vitis vinifera]	Secologanin synthase OS=Catharanthus roseus GN=CYP72A1 PE=2 SV=1	cytochrome P450, family 72, subfamily C, polypeptide 1	0.7644	0.4888	Down
		CL6824.Contig3	cytochrome P450 CYP749A20 [Panax ginseng]	Cytochrome P450 734A1 OS=Arabidopsis thaliana GN=CYP734A1 PE=2 SV=1	cytochrome P450, family 734, subfamily A, polypeptide 1 (PHYB activation tagged suppressor 1) [EC:1.14.-.-]	7.6194	4.8718	Down
		CL485.Contig2	PREDICTED: cytochrome P450 704C1-like [Vitis vinifera]	Cytochrome P450 704C1 OS=Pinus taeda GN=CYP704C1 PE=2 SV=1	cytochrome P450, family 86, subfamily B, polypeptide 1 (fatty acid omega-hydroxylase) [EC:1.14.-.-]	2.4999	1.5686	Down
		CL30.Contig3	cytochrome P450 [Panax notoginseng]	Premnaspirodiene oxygenase OS=Hyoscyamus muticus GN=CYP71D55 PE=1 SV=1	cytochrome P450, family 71, subfamily Z, polypeptide 6 (ent-isokaurene C2-hydroxylase) [EC:1.14.13.143]	31.3457	19.6278	Down
		CL3630.Contig2	cytochrome P450 CYP736A54 [Bupleurum chinense]	Flavonoid 3',5'-hydroxylase 1 OS=Petunia hybrida GN=CYP75A1 PE=2 SV=1	ferulate-5-hydroxylase [EC:1.14.-.-]	6.4078	3.9333	Down
		Unigene4650	PREDICTED: secologanin synthase isoform 1 [Vitis vinifera]	Secologanin synthase OS=Catharanthus roseus GN=CYP72A1 PE=2 SV=1	cytochrome P450, family 72, subfamily C, polypeptide 1	23.9248	14.6017	Down
		CL6034.Contig2	putative cytochrome P450 monooxygenase, partial [Aralia elata]	Secologanin synthase OS=Catharanthus roseus GN=CYP72A1 PE=2 SV=1	cytochrome P450, family 72, subfamily C, polypeptide 1	0.9819	0.586	Down
		CL4425.Contig4	hypothetical protein PRUPE_ppa004199mg [Prunus persica]	Cytochrome P450 89A9 OS=Arabidopsis thaliana GN=CYP89A9 PE=2 SV=1	[EC:1.14.-.-]	19.1631	11.3582	Down
		Unigene23532	cytochrome P450 CYP736A54 [Bupleurum chinense]	Cytochrome P450 93A2 OS=Glycine max GN=CYP93A2 PE=2 SV=1	ferulate-5-hydroxylase [EC:1.14.-.-]	3.3472	1.9567	Down
		Unigene17148	unnamed protein product [Vitis vinifera]	Cytochrome P450 81D1 OS=Arabidopsis thaliana GN=CYP81D1 PE=2 SV=1	[EC:1.14.-.-]	25.4772	14.859	Down
		Unigene12305	cytochrome P450 [Panax notoginseng]	Cytochrome P450 71D7 OS=Solanum chacoense GN=CYP71D7 PE=3 SV=1	cytochrome P450, family 71, subfamily D, polypeptide 9 (flavonoid 6-hydroxylase) [EC:1.14.13.-]	23.8442	13.7446	Down
		Unigene21606	cytochrome P450 [Panax notoginseng]	Premnaspirodiene oxygenase OS=Hyoscyamus muticus GN=CYP71D55 PE=1 SV=1	cytochrome P450, family 71, subfamily D, polypeptide 9 (flavonoid 6-hydroxylase) [EC:1.14.13.-]	0.5049	0.2906	Down
		Unigene13163	PREDICTED: cytochrome P450 93A1-like [Vitis vinifera]	Cytochrome P450 84A1 OS=Arabidopsis thaliana GN=CYP84A1 PE=2 SV=1	ferulate-5-hydroxylase [EC:1.14.-.-]	4.8909	2.805	Down
		CL3946.Contig3	PREDICTED: cytochrome P450 71A8-like [Solanum lycopersicum]	Cytochrome P450 71A8 OS=Mentha piperita GN=CYP71A8 PE=3 SV=1	[EC:1.14.-.-]	2.8479	1.6316	Down
		Unigene10067	cytochrome P450 [Panax notoginseng]	Premnaspirodiene oxygenase OS=Hyoscyamus muticus GN=CYP71D55 PE=1 SV=1	cytochrome P450, family 71, subfamily D, polypeptide 9 (flavonoid 6-hydroxylase) [EC:1.14.13.-]	0.5447	0.3096	Down
		CL4272.Contig1	hypothetical protein PRUPE_ppa026124mg [Prunus persica]	Cytochrome P450 704C1 OS=Pinus taeda GN=CYP704C1 PE=2 SV=1	cytochrome P450, family 86, subfamily A, polypeptide 2/4/7/8 (fatty acid omega-hydroxylase) [EC:1.14.-.-]	1.8769	1.0473	Down
		Unigene20006	PREDICTED: isoflavone 2&apos;-hydroxylase-like [Vitis vinifera]	Cytochrome P450 81D1 OS=Arabidopsis thaliana GN=CYP81D1 PE=2 SV=1	[EC:1.14.-.-]	17.7296	9.6472	Down
		CL10033.Contig1	hypothetical protein PRUPE_ppa004768mg [Prunus persica]	3-epi-6-deoxocathasterone 23-monooxygenase OS=Arabidopsis thaliana GN=ROT3 PE=2 SV=3	cytochrome P450, family 90, subfamily C, polypeptide 1 (3-epi-6-deoxocathasterone 23-monooxygenase) [EC:1.14.13.112]	16.0789	8.7066	Down
		CL9542.Contig1	obtusifoliol-14-demethylase [Nicotiana tabacum]	Sterol 14-demethylase OS=Arabidopsis thaliana GN=CYP51G1 PE=1 SV=1	cytochrome P450, family 51 (sterol 14-demethylase) [EC:1.14.13.70]	3.878	2.0571	Down
		CL465.Contig3	cytochrome P450 [Panax notoginseng]	Flavonoid 3'-monooxygenase OS=Petunia hybrida GN=CYP75B2 PE=2 SV=1	flavonoid 3'-monooxygenase [EC:1.14.13.21]	0.7704	0.3941	Down
		CL5935.Contig1	PREDICTED: cytochrome P450 90A1-like [Solanum lycopersicum]	Cytochrome P450 90A1 OS=Arabidopsis thaliana GN=CYP90A1 PE=2 SV=1	cytochrome P450, family 90, subfamily A, polypeptide 1 [EC:1.14.-.-]	13.6022	6.8399	Down
		Unigene1835	cytochrome P450 CYP90D18 [Bupleurum chinense]	3-epi-6-deoxocathasterone 23-monooxygenase OS=Arabidopsis thaliana GN=CYP90D1 PE=2 SV=1	cytochrome P450, family 90, subfamily D, polypeptide 1 (3-epi-6-deoxocathasterone 23-monooxygenase) [EC:1.14.13.112]	9.5216	4.7879	Down
		CL11515.Contig1	hypothetical protein PRUPE_ppa005322mg [Prunus persica]	Flavonoid 3',5'-hydroxylase OS=Solanum melongena GN=CYP75A2 PE=2 SV=1	cytochrome P450, family 75, subfamily A (flavonoid 3',5'-hydroxylase) [EC:1.14.13.88]	4.0606	2.0238	Down
		CL8495.Contig3	unnamed protein product [Vitis vinifera]	Cytochrome P450 83A1 OS=Arabidopsis thaliana GN=CYP83A1 PE=1 SV=2	cytochrome P450, family 83, subfamily A, polypeptide 1 [EC:1.14.-.-]	11.8085	5.7987	Down
		Unigene4045	PREDICTED: LOW QUALITY PROTEIN: cytochrome P450 71D10-like [Vitis vinifera]	Cytochrome P450 84A1 OS=Arabidopsis thaliana GN=CYP84A1 PE=2 SV=1	ferulate-5-hydroxylase [EC:1.14.-.-]	14.1643	6.8769	Down
		Unigene24769	PREDICTED: cytochrome P450 93A1-like [Solanum lycopersicum]	Ent-cassadiene C2-hydroxylase OS=Oryza sativa subsp. japonica GN=CYP71Z7 PE=1 SV=1	cytochrome P450, family 71, subfamily Z, polypeptide 6 (ent-isokaurene C2-hydroxylase) [EC:1.14.13.143]	5.0391	2.426	Down
		Unigene26263	putative taxane 13-alpha-hydroxylase cytochrome P450 [Artemisia annua]	Cytochrome P450 716B2 OS=Picea sitchensis GN=CYP716B2 PE=2 SV=1	cytochrome P450, family 85, subfamily A, polypeptide 2 (brassinosteroid-6-oxidase 2) [EC:1.14.-.-]	7.0959	3.4028	Down
		CL8495.Contig2	PREDICTED: cytochrome P450 83B1 [Vitis vinifera]	Cytochrome P450 83B1 OS=Arabidopsis thaliana GN=CYP83B1 PE=1 SV=1	cytochrome P450, family 83, subfamily B, polypeptide 1 [EC:1.14.-.-]	9.8203	4.6933	Down
		CL4884.Contig1	PREDICTED: cytochrome P450 734A1-like [Vitis vinifera]	Cytochrome P450 734A1 OS=Arabidopsis thaliana GN=CYP734A1 PE=2 SV=1	cytochrome P450, family 734, subfamily A, polypeptide 1 (PHYB activation tagged suppressor 1) [EC:1.14.-.-]	22.444	10.5358	Down
		Unigene9590	unnamed protein product [Vitis vinifera]	Cytochrome P450 72C1 OS=Arabidopsis thaliana GN=CYP72C1 PE=2 SV=2	cytochrome P450, family 72, subfamily C, polypeptide 1	7.0933	3.2828	Down
		CL4429.Contig2	PREDICTED: LOW QUALITY PROTEIN: abietadienol/abietadienal oxidase-like [Vitis vinifera]	Abietadienol/abietadienal oxidase OS=Pinus taeda GN=CYP720B1 PE=1 SV=1	cytochrome P450, family 90, subfamily B, polypeptide 1 (steroid 22-alpha-hydroxylase) [EC:1.14.13.-]	3.4697	1.5776	Down
		Unigene9481	cytochrome P450, putative [Ricinus communis] >gi|223544570|gb|EEF46086.1| cytochrome P450, putative [Ricinus communis]	Angelicin synthase (Fragment) OS=Pastinaca sativa GN=CYP71AJ4 PE=1 SV=1	[EC:1.14.-.-]	35.898	16.3113	Down
		CL2792.Contig4	unnamed protein product [Vitis vinifera]	Cytochrome P450 72C1 OS=Arabidopsis thaliana GN=CYP72C1 PE=2 SV=2	cytochrome P450, family 72, subfamily C, polypeptide 1	1.8542	0.813	Down
		CL8456.Contig2	PREDICTED: cytochrome P450 734A1-like [Solanum lycopersicum]	Cytochrome P450 734A1 OS=Arabidopsis thaliana GN=CYP734A1 PE=2 SV=1	cytochrome P450, family 734, subfamily A, polypeptide 1 (PHYB activation tagged suppressor 1) [EC:1.14.-.-]	28.6109	12.5443	Down
		Unigene23657	PREDICTED: cytochrome P450 716B1-like [Vitis vinifera]	Cytochrome P450 716B1 OS=Picea sitchensis GN=CYP716B1 PE=2 SV=1	(+)-abscisic acid 8'-hydroxylase [EC:1.14.13.93]	5.7654	2.4954	Down
		CL3371.Contig6	cytochrome P450 CYP736A12 [Panax ginseng]	Cytochrome P450 71A1 OS=Persea americana GN=CYP71A1 PE=1 SV=2	ferulate-5-hydroxylase [EC:1.14.-.-]	17.7134	7.5791	Down
		CL3371.Contig7	cytochrome P450 [Panax ginseng]	Cytochrome P450 71A1 OS=Persea americana GN=CYP71A1 PE=1 SV=2	ferulate-5-hydroxylase [EC:1.14.-.-]	12.6281	5.2023	Down
		Unigene25720	PREDICTED: cytochrome P450 750A1-like [Solanum lycopersicum]	--	--	5.0084	2.0495	Down
		Unigene28015	cytochrome P450 [Panax ginseng]	Flavonoid 3',5'-hydroxylase OS=Gentiana triflora GN=CYP75A4 PE=2 SV=1	4-hydroxyphenylacetaldehyde oxime monooxygenase [EC:1.14.13.68]	11.6195	4.5928	Down
		CL10445.Contig2	Cytochrome P450 [Medicago truncatula] >gi|355512475|gb|AES94098.1| Cytochrome P450 [Medicago truncatula]	Cytochrome P450 87A3 OS=Oryza sativa subsp. japonica GN=CYP87A3 PE=2 SV=3	isocitrate dehydrogenase (NAD+) [EC:1.1.1.41]	6.9306	2.7136	Down
		Unigene6127	cytochrome P450 CYP716A53v2 [Panax ginseng]	Cytochrome P450 716B2 OS=Picea sitchensis GN=CYP716B2 PE=2 SV=1	(+)-abscisic acid 8'-hydroxylase [EC:1.14.13.93]	42.0734	16.4727	Down
		Unigene25751	cytochrome P450 CYP90D18 [Bupleurum chinense]	3-epi-6-deoxocathasterone 23-monooxygenase OS=Arabidopsis thaliana GN=CYP90D1 PE=2 SV=1	cytochrome P450, family 90, subfamily D, polypeptide 1 (3-epi-6-deoxocathasterone 23-monooxygenase) [EC:1.14.13.112]	5.4175	2.1022	Down
		CL4334.Contig2	PREDICTED: cytochrome P450 82A3-like [Vitis vinifera]	Cytochrome P450 82A3 OS=Glycine max GN=CYP82A3 PE=2 SV=1	[EC:1.14.-.-]	44.4754	16.6967	Down
		CL2140.Contig1	PREDICTED: cytochrome P450 71A8-like [Solanum lycopersicum]	Cytochrome P450 71A8 OS=Mentha piperita GN=CYP71A8 PE=3 SV=1	--	2.834	1.0543	Down
		Unigene29211	steroid 22-alpha-hydroxylase [Zinnia elegans]	Cytochrome P450 90B1 OS=Arabidopsis thaliana GN=CYP90B1 PE=1 SV=2	cytochrome P450, family 90, subfamily B, polypeptide 1 (steroid 22-alpha-hydroxylase) [EC:1.14.13.-]	3.1327	1.1654	Down
		Unigene12146	cytochrome P450 CYP736A54 [Bupleurum chinense]	Cytochrome P450 71B6 OS=Arabidopsis thaliana GN=CYP71B6 PE=2 SV=1	ferulate-5-hydroxylase [EC:1.14.-.-]	6.3695	2.3695	Down
		Unigene13734	PREDICTED: cytochrome P450 76A2-like [Solanum lycopersicum]	Cytochrome P450 76A2 OS=Solanum melongena GN=CYP76A2 PE=2 SV=1	[EC:1.14.-.-]	29.4606	10.727	Down
		Unigene9831	PREDICTED: cytochrome P450 87A3-like [Solanum lycopersicum]	Cytochrome P450 87A3 OS=Oryza sativa subsp. japonica GN=CYP87A3 PE=2 SV=3	isocitrate dehydrogenase (NAD+) [EC:1.1.1.41]	5.8098	2.0574	Down
		CL465.Contig1	cytochrome P450 [Panax notoginseng]	Cytochrome P450 71A1 OS=Persea americana GN=CYP71A1 PE=1 SV=2	flavonoid 3'-monooxygenase [EC:1.14.13.21]	16.0245	5.597	Down
		Unigene4704	cytochrome P450-dependent fatty acid hydroxylase [Nicotiana tabacum]	Cytochrome P450 94A2 OS=Vicia sativa GN=CYP94A2 PE=2 SV=1	cytochrome P450, family 94, subfamily A, polypeptide 1 (fatty acid omega-hydroxylase) [EC:1.14.-.-]	54.9651	17.6259	Down
		CL11163.Contig1	unnamed protein product [Vitis vinifera]	Cytochrome P450 90B1 OS=Arabidopsis thaliana GN=CYP90B1 PE=1 SV=2	cytochrome P450, family 90, subfamily B, polypeptide 1 (steroid 22-alpha-hydroxylase) [EC:1.14.13.-]	30.4339	9.5219	Down
		Unigene20295	PREDICTED: flavonoid 3&apos;-monooxygenase-like [Fragaria vesca subsp. vesca]	Flavonoid 3',5'-hydroxylase 1 OS=Petunia hybrida GN=CYP75A1 PE=2 SV=1	cytochrome P450, family 75, subfamily A (flavonoid 3',5'-hydroxylase) [EC:1.14.13.88]	6.2997	1.9693	Down
		CL6841.Contig4	hypothetical protein PRUPE_ppa018724mg [Prunus persica]	Cytochrome P450 734A1 OS=Arabidopsis thaliana GN=CYP734A1 PE=2 SV=1	cytochrome P450, family 734, subfamily A, polypeptide 1 (PHYB activation tagged suppressor 1) [EC:1.14.-.-]	0.8595	0.2605	Down
		CL2782.Contig1	PREDICTED: cytochrome P450 93A1-like [Vitis vinifera]	Cytochrome P450 93A1 OS=Glycine max GN=CYP93A1 PE=2 SV=1	flavonoid 3'-monooxygenase [EC:1.14.13.21]	5.2257	1.5724	Down
		CL10580.Contig1	hypothetical protein PRUPE_ppa024661mg [Prunus persica]	Cytochrome P450 93A3 OS=Glycine max GN=CYP93A3 PE=2 SV=1	cytochrome P450, family 93, subfamily A, polypeptide 1 (3,9-dihydroxypterocarpan 6a-monooxygenase) [EC:1.14.13.28]	1.5382	0.459	Down
		Unigene28261	PREDICTED: cytochrome P450 97B2, chloroplastic-like [Solanum lycopersicum]	Cytochrome P450 97B2, chloroplastic OS=Glycine max GN=CYP97B2 PE=2 SV=1	cytochrome P450, family 97, subfamily A (beta-ring hydroxylase) [EC:1.14.-.-]	6.0818	1.8011	Down
		Unigene3274	PREDICTED: cytochrome P450 71A1-like [Glycine max]	Cytochrome P450 750A1 OS=Pinus taeda GN=CYP750A1 PE=2 SV=1	ferulate-5-hydroxylase [EC:1.14.-.-]	10.8221	3.2049	Down
		Unigene18307	cytochrome P450, putative [Ricinus communis] >gi|223496973|gb|EEF22080.1| cytochrome P450, putative [Ricinus communis]	Cytochrome P450 90A1 OS=Arabidopsis thaliana GN=CYP90A1 PE=2 SV=1	cytochrome P450, family 90, subfamily A, polypeptide 1 [EC:1.14.-.-]	9.0105	2.3389	Down
		CL2792.Contig3	PREDICTED: LOW QUALITY PROTEIN: secologanin synthase-like [Vitis vinifera]	Secologanin synthase OS=Catharanthus roseus GN=CYP72A1 PE=2 SV=1	cytochrome P450, family 72, subfamily C, polypeptide 1	1.3219	0.3381	Down
		Unigene14982	unnamed protein product [Vitis vinifera]	Cytochrome P450 71A25 OS=Arabidopsis thaliana GN=CYP71A25 PE=2 SV=1	[EC:1.14.-.-]	35.2198	8.7768	Down
		Unigene9477	PREDICTED: cytochrome P450 82C4 [Vitis vinifera] >gi|147794787|emb|CAN66846.1| hypothetical protein VITISV_002367 [Vitis vinifera]	Cytochrome P450 82A3 OS=Glycine max GN=CYP82A3 PE=2 SV=1	[EC:1.14.-.-]	68.284	16.7986	Down
		CL2792.Contig2	PREDICTED: secologanin synthase-like [Vitis vinifera]	Secologanin synthase OS=Catharanthus roseus GN=CYP72A1 PE=2 SV=1	cytochrome P450, family 72, subfamily C, polypeptide 1	1.6463	0.3989	Down
		Unigene18501	cytochrome P450 [Populus trichocarpa] >gi|222860557|gb|EEE98104.1| cytochrome P450 [Populus trichocarpa]	Secologanin synthase OS=Catharanthus roseus GN=CYP72A1 PE=2 SV=1	cytochrome P450, family 72, subfamily C, polypeptide 1	30.5551	7.0443	Down
		Unigene28992	unnamed protein product [Vitis vinifera]	Cytochrome P450 705A5 OS=Arabidopsis thaliana GN=CYP705A5 PE=2 SV=1	[EC:1.14.-.-]	2.2847	0.5009	Down
		CL11163.Contig3	steroid 22-alpha hydroxylase [Populus euphratica]	Cytochrome P450 90B1 OS=Arabidopsis thaliana GN=CYP90B1 PE=1 SV=2	cytochrome P450, family 90, subfamily B, polypeptide 1 (steroid 22-alpha-hydroxylase) [EC:1.14.13.-]	5.5902	1.2255	Down
		CL6874.Contig2	PREDICTED: cytochrome P450 734A1 [Vitis vinifera] >gi|297736650|emb|CBI25521.3| unnamed protein product [Vitis vinifera]	Cytokinin hydroxylase OS=Arabidopsis thaliana GN=CYP735A1 PE=1 SV=1	cytokinin trans-hydroxylase	10.8354	2.3702	Down
		Unigene15139	PREDICTED: cytochrome P450 85A [Vitis vinifera] >gi|298204461|emb|CBI16941.3| unnamed protein product [Vitis vinifera]	Cytochrome P450 85A1 OS=Solanum lycopersicum GN=CYP85A1 PE=2 SV=1	cytochrome P450, family 85, subfamily A, polypeptide 2 (brassinosteroid-6-oxidase 2) [EC:1.14.-.-]	14.6765	3.1896	Down
		Unigene10058	PREDICTED: secologanin synthase isoform 1 [Vitis vinifera]	Secologanin synthase OS=Catharanthus roseus GN=CYP72A1 PE=2 SV=1	cytochrome P450, family 72, subfamily C, polypeptide 1	1.6464	0.3563	Down
		CL8599.Contig1	cytochrome P450 [Populus trichocarpa] >gi|222855083|gb|EEE92630.1| cytochrome P450 [Populus trichocarpa]	Cytochrome P450 76A2 OS=Solanum melongena GN=CYP76A2 PE=2 SV=1	[EC:1.14.-.-]	37.3668	8.0794	Down
		Unigene19741	PREDICTED: secologanin synthase [Vitis vinifera] >gi|296081714|emb|CBI20719.3| unnamed protein product [Vitis vinifera]	Secologanin synthase OS=Catharanthus roseus GN=CYP72A1 PE=2 SV=1	cytochrome P450, family 734, subfamily A, polypeptide 1 (PHYB activation tagged suppressor 1) [EC:1.14.-.-]	31.9122	6.4531	Down
		Unigene28115	PREDICTED: cytochrome P450 94A2-like isoform 2 [Solanum lycopersicum]	Cytochrome P450 94A1 OS=Vicia sativa GN=CYP94A1 PE=2 SV=2	[EC:1.14.-.-]	4.8415	0.9172	Down
		Unigene20516	cytochrome P450 probable campestanol to 6-deoxocathasterone or 6-oxocampestanol to cathasterone [Populus trichocarpa] >gi|222853127|gb|EEE90674.1| cytochrome P450 probable campestanol to 6-deoxocathasterone or 6-oxocampestanol to cathasterone [Populus trichocarpa]	Cytochrome P450 90B1 OS=Arabidopsis thaliana GN=CYP90B1 PE=1 SV=2	cytochrome P450, family 90, subfamily B, polypeptide 1 (steroid 22-alpha-hydroxylase) [EC:1.14.13.-]	13.204	2.4938	Down
		CL3946.Contig4	PREDICTED: cytochrome P450 71A8-like [Solanum lycopersicum]	Cytochrome P450 71A8 OS=Mentha piperita GN=CYP71A8 PE=3 SV=1	[EC:1.14.-.-]	39.2443	7.3868	Down
		Unigene24770	PREDICTED: flavonoid 3&apos;-monooxygenase-like [Fragaria vesca subsp. vesca]	Cytochrome P450 71B25 OS=Arabidopsis thaliana GN=CYP71B25 PE=2 SV=1	[EC:1.14.-.-]	3.0145	0.5607	Down
		Unigene17116	unnamed protein product [Vitis vinifera]	Cytochrome P450 71A1 OS=Persea americana GN=CYP71A1 PE=1 SV=2	cytochrome P450, family 83, subfamily B, polypeptide 1 [EC:1.14.-.-]	17.1062	3.0883	Down
		Unigene5249	PREDICTED: cytochrome P450 93A1-like [Solanum lycopersicum]	Cytochrome P450 93A1 OS=Glycine max GN=CYP93A1 PE=2 SV=1	cytochrome P450, family 93, subfamily A, polypeptide 1 (3,9-dihydroxypterocarpan 6a-monooxygenase) [EC:1.14.13.28]	7.4155	1.3142	Down
		CL6841.Contig6	PREDICTED: cytochrome P450 734A1-like [Solanum lycopersicum]	Cytochrome P450 734A1 OS=Arabidopsis thaliana GN=CYP734A1 PE=2 SV=1	cytochrome P450, family 734, subfamily A, polypeptide 1 (PHYB activation tagged suppressor 1) [EC:1.14.-.-]	2.9956	0.478	Down
		CL4429.Contig1	unknown [Medicago truncatula]	Abietadienol/abietadienal oxidase OS=Pinus taeda GN=CYP720B1 PE=1 SV=1	cytochrome P450, family 90, subfamily B, polypeptide 1 (steroid 22-alpha-hydroxylase) [EC:1.14.13.-]	1.1839	0.173	Down
		Unigene1659	PREDICTED: cytochrome P450 734A1-like [Solanum lycopersicum]	Cytochrome P450 734A1 OS=Arabidopsis thaliana GN=CYP734A1 PE=2 SV=1	cytochrome P450, family 734, subfamily A, polypeptide 1 (PHYB activation tagged suppressor 1) [EC:1.14.-.-]	32.0732	4.628	Down
		CL8319.Contig1	unnamed protein product [Vitis vinifera]	Cytochrome P450 76A2 OS=Solanum melongena GN=CYP76A2 PE=2 SV=1	[EC:1.14.-.-]	37.515	5.1779	Down
		Unigene28411	Cytochrome P450 [Medicago truncatula] >gi|355499870|gb|AES81073.1| Cytochrome P450 [Medicago truncatula]	Cytochrome P450 94A2 OS=Vicia sativa GN=CYP94A2 PE=2 SV=1	[EC:1.14.-.-]	4.2407	0.5785	Down
		CL8599.Contig2	PREDICTED: cytochrome P450 76A2-like [Glycine max]	Cytochrome P450 76A1 (Fragment) OS=Solanum melongena GN=CYP76A1 PE=2 SV=1	[EC:1.14.-.-]	10.7896	1.4151	Down
		CL8947.Contig1	PREDICTED: secologanin synthase-like [Solanum lycopersicum]	Secologanin synthase OS=Catharanthus roseus GN=CYP72A1 PE=2 SV=1	cytochrome P450, family 72, subfamily C, polypeptide 1	0.5091	0.0651	Down
		Unigene26683	cytochrome P450 probable campestanol to 6-deoxocathasterone or 6-oxocampestanol to cathasterone [Populus trichocarpa] >gi|222853127|gb|EEE90674.1| cytochrome P450 probable campestanol to 6-deoxocathasterone or 6-oxocampestanol to cathasterone [Populus trichocarpa]	Cytochrome P450 90B1 OS=Arabidopsis thaliana GN=CYP90B1 PE=1 SV=2	cytochrome P450, family 90, subfamily B, polypeptide 1 (steroid 22-alpha-hydroxylase) [EC:1.14.13.-]	4.2719	0.4995	Down
		Unigene28159	cytochrome P450, putative [Ricinus communis] >gi|223546236|gb|EEF47738.1| cytochrome P450, putative [Ricinus communis]	Cytochrome P450 78A3 OS=Glycine max GN=CYP78A3 PE=2 SV=1	[EC:1.14.-.-]	4.7289	0.5183	Down
		Unigene26388	PREDICTED: cytochrome P450 716B1-like [Glycine max]	Cytochrome P450 85A1 OS=Oryza sativa subsp. japonica GN=CYP85A1 PE=1 SV=1	cytochrome P450, family 90, subfamily D, polypeptide 2 (steroid 3-oxidase) [EC:1.14.-.-]	6.3526	0.5908	Down
		Unigene12775	cytochrome P450, putative [Ricinus communis] >gi|223550408|gb|EEF51895.1| cytochrome P450, putative [Ricinus communis]	Psoralen synthase OS=Ammi majus GN=CYP71AJ1 PE=1 SV=1	cytochrome P450, family 71, subfamily A, polypeptide 13 (indoleacetaldoxime dehydratase) [EC:4.99.1.6]	28.3701	2.4997	Down
		Unigene25043	PREDICTED: cytochrome P450 71A8-like [Solanum lycopersicum]	Cytochrome P450 71A6 (Fragment) OS=Nepeta racemosa GN=CYP71A6 PE=2 SV=1	cytochrome P450, family 71, subfamily A, polypeptide 13 (indoleacetaldoxime dehydratase) [EC:4.99.1.6]	3.5518	0.2595	Down
		Unigene3033	PREDICTED: cytochrome P450 734A1-like [Solanum lycopersicum]	Cytochrome P450 734A1 OS=Arabidopsis thaliana GN=CYP734A1 PE=2 SV=1	cytochrome P450, family 734, subfamily A, polypeptide 1 (PHYB activation tagged suppressor 1) [EC:1.14.-.-]	28.2753	2.0222	Down
		Unigene25156	PREDICTED: cytochrome P450 78A4-like [Vitis vinifera]	Cytochrome P450 78A4 OS=Pinus radiata GN=CYP78A4 PE=2 SV=1	[EC:1.14.-.-]	6.4251	0.2777	Down
		Unigene25042	PREDICTED: cytochrome P450 71A2-like isoform 1 [Vitis vinifera]	Cytochrome P450 71A3 (Fragment) OS=Solanum melongena GN=CYP71A3 PE=2 SV=1	[EC:1.14.-.-]	5.3219	0.2269	Down
		Unigene24926	PREDICTED: cytochrome P450 82A3-like [Cucumis sativus]	Cytochrome P450 82A4 OS=Glycine max GN=CYP82A4 PE=2 SV=1	[EC:1.14.-.-]	5.7617	0.2456	Down
		Unigene22834	cytochrome P450, partial [Panax notoginseng]	Cytochrome P450 78A3 OS=Glycine max GN=CYP78A3 PE=2 SV=1	[EC:1.14.-.-]	5.9587	0.2177	Down
		Unigene28131	PREDICTED: cytochrome P450 71A25-like isoform 2 [Fragaria vesca subsp. vesca]	Psoralen synthase OS=Ammi majus GN=CYP71AJ1 PE=1 SV=1	[EC:1.14.-.-]	5.4895	0.156	Down
		CL11117.Contig1	cytochrome P450, partial [Panax notoginseng]	Cytochrome P450 78A3 OS=Glycine max GN=CYP78A3 PE=2 SV=1	[EC:1.14.-.-]	10.0599	0.0609	Down
		CL8947.Contig2	putative cytochrome P450 monooxygenase, partial [Aralia elata]	Secologanin synthase OS=Catharanthus roseus GN=CYP72A1 PE=2 SV=1	cytochrome P450, family 72, subfamily C, polypeptide 1	0.5288	0	Down
		Unigene23933	cytochrome P450 [Panax notoginseng]	Abscisic acid 8'-hydroxylase 2 OS=Oryza sativa subsp. japonica GN=CYP707A6 PE=2 SV=1	(+)-abscisic acid 8'-hydroxylase [EC:1.14.13.93]	4.8415	0	Down
		Unigene24113	PREDICTED: cytochrome P450 71A2-like [Solanum lycopersicum]	Cytochrome P450 71A26 OS=Arabidopsis thaliana GN=CYP71A26 PE=3 SV=1	[EC:1.14.-.-]	3.8028	0	Down
		Unigene25647	cytochrome P450 like_TBP [Nicotiana tabacum]	--	--	33.3555	0	Down
		CL6874.Contig1	PREDICTED: cytokinin hydroxylase-like [Solanum lycopersicum]	Cytochrome P450 734A1 OS=Arabidopsis thaliana GN=CYP734A1 PE=2 SV=1	cytochrome P450, family 734, subfamily A, polypeptide 1 (PHYB activation tagged suppressor 1) [EC:1.14.-.-]	0.2472	0	Down
		CL3623.Contig11	cytochrome P450 CYP707A67 [Bupleurum chinense]	Abscisic acid 8'-hydroxylase 1 OS=Arabidopsis thaliana GN=CYP707A1 PE=2 SV=1	(+)-abscisic acid 8'-hydroxylase [EC:1.14.13.93]	0	0	-
		CL3623.Contig12	cytochrome P450 CYP707A67 [Bupleurum chinense]	Abscisic acid 8'-hydroxylase 1 OS=Arabidopsis thaliana GN=CYP707A1 PE=2 SV=1	(+)-abscisic acid 8'-hydroxylase [EC:1.14.13.93]	0	0	-
		CL3623.Contig5	cytochrome P450 CYP707A67 [Bupleurum chinense]	Abscisic acid 8'-hydroxylase 1 OS=Arabidopsis thaliana GN=CYP707A1 PE=2 SV=1	(+)-abscisic acid 8'-hydroxylase [EC:1.14.13.93]	0	0	-
		CL3623.Contig6	cytochrome P450 CYP707A67 [Bupleurum chinense]	Abscisic acid 8'-hydroxylase 1 OS=Arabidopsis thaliana GN=CYP707A1 PE=2 SV=1	(+)-abscisic acid 8'-hydroxylase [EC:1.14.13.93]	0	0	-
		CL85.Contig2	cytochrome P450 CYP707A67 [Bupleurum chinense]	Abscisic acid 8'-hydroxylase 1 OS=Arabidopsis thaliana GN=CYP707A1 PE=2 SV=1	(+)-abscisic acid 8'-hydroxylase [EC:1.14.13.93]	0	0	-
		CL85.Contig3	cytochrome P450 CYP707A67 [Bupleurum chinense]	Abscisic acid 8'-hydroxylase 1 OS=Arabidopsis thaliana GN=CYP707A1 PE=2 SV=1	(+)-abscisic acid 8'-hydroxylase [EC:1.14.13.93]	0	0	-
	GT (142 unigenes)	CL5932.Contig3	glycosyltransferase UGT7 [Bupleurum chinense]	Anthocyanin 3'-O-beta-glucosyltransferase OS=Gentiana triflora PE=1 SV=1	UDP-glucosyl transferase 73C [EC:2.4.1.-]	59.7444	283.906	Up
		Unigene17310	glycosyltransferase [Panax notoginseng]	UDP-glucose flavonoid 3-O-glucosyltransferase 6 OS=Fragaria ananassa GN=GT6 PE=1 SV=1	hydroquinone glucosyltransferase [EC:2.4.1.218]	130.888	516.236	Up
		Unigene17309	glycosyltransferase [Panax notoginseng]	UDP-glycosyltransferase 71B2 OS=Arabidopsis thaliana GN=UGT71B2 PE=1 SV=1	isoflavone 7-O-glucosyltransferase [EC:2.4.1.170]	14.7766	57.2506	Up
		CL6140.Contig1	glycosyltransferase, putative [Ricinus communis] >gi|223526710|gb|EEF28943.1| glycosyltransferase, putative [Ricinus communis]	--	--	12.2464	39.634	Up
		CL7102.Contig2	PREDICTED: probable xyloglucan glycosyltransferase 6-like [Solanum lycopersicum]	Probable xyloglucan glycosyltransferase 6 OS=Arabidopsis thaliana GN=CSLC6 PE=1 SV=1	--	1.6599	5.0945	Up
		Unigene1755	glycosyltransferase [Panax notoginseng]	Probable galacturonosyltransferase-like 10 OS=Arabidopsis thaliana GN=GATL10 PE=2 SV=1	alpha-1,4-galacturonosyltransferase [EC:2.4.1.43]	32.7282	92.5025	Up
		Unigene4728	PREDICTED: D-inositol-3-phosphate glycosyltransferase-like [Glycine max]	--	sulfoquinovosyltransferase [EC:2.4.1.-]	10.3837	26.1459	Up
		Unigene652	glycosyltransferase, putative [Ricinus communis] >gi|223526710|gb|EEF28943.1| glycosyltransferase, putative [Ricinus communis]	--	--	2.5903	6.4358	Up
		CL5932.Contig2	glycosyltransferase UGT7 [Bupleurum chinense]	Anthocyanin 3'-O-beta-glucosyltransferase OS=Gentiana triflora PE=1 SV=1	UDP-glucosyl transferase 73C [EC:2.4.1.-]	7.8575	18.7565	Up
		Unigene6434	glycosyltransferase UGT95A1 [Hieracium pilosella]	UDP-glycosyltransferase 73B4 OS=Arabidopsis thaliana GN=UGT73B4 PE=2 SV=1	pathogen-inducible salicylic acid glucosyltransferase [EC:2.4.1.-]	8.4249	19.5297	Up
		CL9505.Contig2	PREDICTED: probable glycosyltransferase At5g03795-like [Vitis vinifera]	Probable glycosyltransferase At5g03795 OS=Arabidopsis thaliana GN=At5g03795 PE=3 SV=2	--	18.753	41.7558	Up
		CL9454.Contig3	glycosyltransferase [Panax notoginseng]	Xyloglucan glycosyltransferase 4 OS=Arabidopsis thaliana GN=CSLC4 PE=1 SV=1	beta-mannan synthase [EC:2.4.1.32]	7.3986	13.8799	Up
		Unigene7537	flavonoid glycosyltransferase UGT94F1 [Veronica persica]	Cyanidin-3-O-glucoside 2-O-glucuronosyltransferase OS=Bellis perennis GN=UGAT PE=1 SV=1	coniferyl-alcohol glucosyltransferase [EC:2.4.1.111]	1.5886	2.7861	Up
		Unigene8221	unnamed protein product [Vitis vinifera]	Probable glycosyltransferase At5g25310 OS=Arabidopsis thaliana GN=At5g25310 PE=3 SV=2	--	26.5341	46.0113	Up
		CL5932.Contig1	glycosyltransferase UGT2 [Bupleurum chinense]	Anthocyanin 3'-O-beta-glucosyltransferase OS=Gentiana triflora PE=1 SV=1	UDP-glucosyl transferase 73C [EC:2.4.1.-]	0.3631	0.5944	Up
		CL2424.Contig3	PREDICTED: probable xyloglucan glycosyltransferase 12-like [Cucumis sativus] >gi|449509266|ref|XP_004163539.1| PREDICTED: probable xyloglucan glycosyltransferase 12-like [Cucumis sativus]	Probable xyloglucan glycosyltransferase 12 OS=Arabidopsis thaliana GN=CSLC12 PE=1 SV=1	beta-mannan synthase [EC:2.4.1.32]	1.1162	1.6154	Up
		CL11688.Contig1	cellulose synthase-like protein [Populus tomentosa]	Probable xyloglucan glycosyltransferase 12 OS=Arabidopsis thaliana GN=CSLC12 PE=1 SV=1	nucleoporin-like protein 2	5.8622	8.4593	Up
		CL8216.Contig3	glycosyltransferase UGT6 [Bupleurum chinense]	UDP-glycosyltransferase 85A3 OS=Arabidopsis thaliana GN=UGT85A3 PE=2 SV=2	cyanohydrin beta-glucosyltransferase [EC:2.4.1.85]	10.9459	15.6846	Up
		CL1634.Contig3	glycosyltransferase, putative [Ricinus communis] >gi|223526710|gb|EEF28943.1| glycosyltransferase, putative [Ricinus communis]	--	--	11.4544	16.1523	Up
		CL9454.Contig1	glycosyltransferase [Panax notoginseng]	Xyloglucan glycosyltransferase 4 OS=Arabidopsis thaliana GN=CSLC4 PE=1 SV=1	beta-mannan synthase [EC:2.4.1.32]	15.3591	21.093	Up
		CL2188.Contig9	beta 1,3-glycosyltransferase-like protein I [Solanum lycopersicum] >gi|20372915|emb|CAD30015.1| beta 1,3-glycosyltransferase-like protein I [Solanum lycopersicum]	Probable beta-1,3-galactosyltransferase 11 OS=Arabidopsis thaliana GN=B3GALT11 PE=2 SV=1	--	1.2432	1.6958	Up
		CL4512.Contig3	PREDICTED: probable xyloglucan glycosyltransferase 6-like [Vitis vinifera]	Probable xyloglucan glycosyltransferase 6 OS=Arabidopsis thaliana GN=CSLC6 PE=1 SV=1	beta-mannan synthase [EC:2.4.1.32]	5.7121	7.5352	Up
		Unigene12314	PREDICTED: probable xyloglucan glycosyltransferase 12-like [Fragaria vesca subsp. vesca]	Probable xyloglucan glycosyltransferase 1 OS=Oryza sativa subsp. japonica GN=CSLC1 PE=2 SV=1	beta-mannan synthase [EC:2.4.1.32]	0.5321	0.6928	Up
		CL2188.Contig7	beta 1,3-glycosyltransferase-like protein I [Solanum lycopersicum] >gi|20372915|emb|CAD30015.1| beta 1,3-glycosyltransferase-like protein I [Solanum lycopersicum]	Probable beta-1,3-galactosyltransferase 11 OS=Arabidopsis thaliana GN=B3GALT11 PE=2 SV=1	--	1.1524	1.4635	Up
		Unigene30117	PREDICTED: probable xyloglucan glycosyltransferase 12 [Vitis vinifera]	Probable xyloglucan glycosyltransferase 12 OS=Arabidopsis thaliana GN=CSLC12 PE=1 SV=1	beta-mannan synthase [EC:2.4.1.32]	1.677	2.0833	Up
		CL3691.Contig2	hypothetical protein PRUPE_ppa004625mg [Prunus persica]	Probable glycosyltransferase At5g20260 OS=Arabidopsis thaliana GN=At5g20260 PE=3 SV=3	--	1.0759	1.3208	Up
		Unigene19055	PREDICTED: probable glycosyltransferase At5g11130-like [Solanum lycopersicum]	Probable glycosyltransferase At3g07620 OS=Arabidopsis thaliana GN=At3g07620 PE=3 SV=1	--	45.0178	55.1744	Up
		Unigene7434	PREDICTED: probable glycosyltransferase At5g03795-like isoform 1 [Solanum lycopersicum] >gi|460399281|ref|XP_004245170.1| PREDICTED: probable glycosyltransferase At5g03795-like isoform 2 [Solanum lycopersicum]	Probable glycosyltransferase At5g03795 OS=Arabidopsis thaliana GN=At5g03795 PE=3 SV=2	--	7.1627	8.7526	Up
		Unigene2057	PREDICTED: dolichyl-diphosphooligosaccharide--protein glycosyltransferase subunit 4A-like isoform 1 [Solanum lycopersicum]	Dolichyl-diphosphooligosaccharide--protein glycosyltransferase subunit 4A OS=Oryza sativa subsp. japonica GN=OST4A PE=3 SV=1	--	12.258	14.8917	Up
		Unigene354	PREDICTED: probable glycosyltransferase At5g03795 [Vitis vinifera]	--	--	6.8861	8.1103	Up
		CL1634.Contig1	glycosyltransferase, putative [Ricinus communis] >gi|223526710|gb|EEF28943.1| glycosyltransferase, putative [Ricinus communis]	--	--	8.4089	9.6453	Up
		CL10141.Contig1	PREDICTED: probable glycosyltransferase At5g03795-like [Glycine max]	Probable glycosyltransferase At5g03795 OS=Arabidopsis thaliana GN=At5g03795 PE=3 SV=2	--	0.3297	0.3748	Up
		Unigene14012	glycosyltransferase [Panax notoginseng]	Flavanone 7-O-glucoside 2''-O-beta-L-rhamnosyltransferase OS=Citrus maxima GN=C12RT1 PE=1 SV=2	--	3.5211	3.9624	Up
		Unigene27785	PREDICTED: probable xyloglucan glycosyltransferase 12-like [Fragaria vesca subsp. vesca]	Probable xyloglucan glycosyltransferase 1 OS=Oryza sativa subsp. japonica GN=CSLC1 PE=2 SV=1	beta-mannan synthase [EC:2.4.1.32]	0.6441	0.7248	Up
		Unigene5569	glycosyltransferase UGT5 [Bupleurum chinense]	Cyanidin-3-O-glucoside 2-O-glucuronosyltransferase OS=Bellis perennis GN=UGAT PE=1 SV=1	--	2.7022	2.9948	Up
		Unigene6592	PREDICTED: putative glycosyltransferase 3 [Vitis vinifera]	Xyloglucan 6-xylosyltransferase OS=Arabidopsis thaliana GN=XT1 PE=1 SV=1	xyloglucan 6-xylosyltransferase [EC:2.4.2.39]	41.0628	45.0908	Up
		CL2254.Contig2	hypothetical protein PRUPE_ppa002395mg [Prunus persica]	Probable glycosyltransferase At5g03795 OS=Arabidopsis thaliana GN=At5g03795 PE=3 SV=2	--	6.4385	6.9743	Up
		CL2188.Contig5	beta 1,3-glycosyltransferase-like protein I [Solanum lycopersicum] >gi|20372915|emb|CAD30015.1| beta 1,3-glycosyltransferase-like protein I [Solanum lycopersicum]	Probable beta-1,3-galactosyltransferase 11 OS=Arabidopsis thaliana GN=B3GALT11 PE=2 SV=1	--	1.9161	2.0387	Up
		CL2188.Contig4	beta 1,3-glycosyltransferase-like protein I [Solanum lycopersicum] >gi|20372915|emb|CAD30015.1| beta 1,3-glycosyltransferase-like protein I [Solanum lycopersicum]	Probable beta-1,3-galactosyltransferase 11 OS=Arabidopsis thaliana GN=B3GALT11 PE=2 SV=1	--	2.0145	2.1433	Up
		CL4405.Contig1	glycosyltransferase, CAZy family GT2 [Populus trichocarpa] >gi|222839184|gb|EEE77535.1| glycosyltransferase, CAZy family GT2 [Populus trichocarpa] >gi|429326498|gb|AFZ78589.1| cellulose synthase-like protein [Populus tomentosa]	Cellulose synthase-like protein D3 OS=Arabidopsis thaliana GN=CSLD3 PE=1 SV=1	1,4-beta-D-xylan synthase [EC:2.4.2.24]	2.6857	2.8513	Up
		CL2971.Contig7	glycosyltransferase [Populus trichocarpa] >gi|222867096|gb|EEF04227.1| glycosyltransferase [Populus trichocarpa]	Probable galacturonosyltransferase 14 OS=Arabidopsis thaliana GN=GAUT14 PE=2 SV=1	alpha-1,4-galacturonosyltransferase [EC:2.4.1.43]	5.4535	5.7082	Up
		CL8216.Contig2	glycosyltransferase UGT6 [Bupleurum chinense]	UDP-glycosyltransferase 85A5 OS=Arabidopsis thaliana GN=UGT85A5 PE=2 SV=1	cyanohydrin beta-glucosyltransferase [EC:2.4.1.85]	0.5679	0.581	Up
		Unigene12711	PREDICTED: probable xyloglucan glycosyltransferase 6-like [Vitis vinifera]	Probable xyloglucan glycosyltransferase 6 OS=Arabidopsis thaliana GN=CSLC6 PE=1 SV=1	--	11.2891	11.5492	Up
		Unigene2376	putative glycosyltransferase, partial [Aralia elata]	UDP-glycosyltransferase 74E1 OS=Arabidopsis thaliana GN=UGT74E1 PE=3 SV=1	pathogen-inducible salicylic acid glucosyltransferase [EC:2.4.1.-]	5.3534	5.4767	Up
		Unigene8668	PREDICTED: uncharacterized protein LOC100243455 [Vitis vinifera] >gi|147770840|emb|CAN74174.1| hypothetical protein VITISV_019222 [Vitis vinifera]	Probable dolichyl-diphosphooligosaccharide--protein glycosyltransferase subunit 3B OS=Arabidopsis thaliana GN=OST3B PE=2 SV=1	oligosaccharyltransferase complex subunit gamma	4.8763	4.9886	Up
		CL5932.Contig4	glycosyltransferase UGT7 [Bupleurum chinense]	Anthocyanin 3'-O-beta-glucosyltransferase OS=Gentiana triflora PE=1 SV=1	UDP-glucosyl transferase 73C [EC:2.4.1.-]	53.4279	54.6259	Up
		Unigene18946	PREDICTED: probable glucuronosyltransferase Os02g0520750-like [Solanum lycopersicum]	Probable glycosyltransferase At5g11130 OS=Arabidopsis thaliana GN=At5g11120/At5g11130 PE=3 SV=2	--	7.4283	7.5376	Up
		CL9454.Contig2	glycosyltransferase [Panax notoginseng]	Xyloglucan glycosyltransferase 4 OS=Arabidopsis thaliana GN=CSLC4 PE=1 SV=1	beta-mannan synthase [EC:2.4.1.32]	4.4867	4.5313	Up
		CL2424.Contig1	PREDICTED: probable xyloglucan glycosyltransferase 12-like [Cucumis sativus] >gi|449509266|ref|XP_004163539.1| PREDICTED: probable xyloglucan glycosyltransferase 12-like [Cucumis sativus]	Probable xyloglucan glycosyltransferase 12 OS=Arabidopsis thaliana GN=CSLC12 PE=1 SV=1	beta-mannan synthase [EC:2.4.1.32]	1.2348	1.1984	Down
		CL2971.Contig8	glycosyltransferase [Populus trichocarpa] >gi|222867096|gb|EEF04227.1| glycosyltransferase [Populus trichocarpa]	Probable galacturonosyltransferase 14 OS=Arabidopsis thaliana GN=GAUT14 PE=2 SV=1	alpha-1,4-galacturonosyltransferase [EC:2.4.1.43]	0.9206	0.8895	Down
		CL5404.Contig3	PREDICTED: dolichyl-diphosphooligosaccharide--protein glycosyltransferase 48 kDa subunit [Vitis vinifera] >gi|297741420|emb|CBI32551.3| unnamed protein product [Vitis vinifera]	Dolichyl-diphosphooligosaccharide--protein glycosyltransferase 48 kDa subunit OS=Arabidopsis thaliana GN=OST48 PE=2 SV=1	oligosaccharyltransferase complex subunit beta	6.2137	5.986	Down
		CL9522.Contig1	PREDICTED: putative glycosyltransferase 2 [Vitis vinifera]	Xyloglucan 6-xylosyltransferase OS=Arabidopsis thaliana GN=XT1 PE=1 SV=1	xyloglucan 6-xylosyltransferase [EC:2.4.2.39]	24.0712	23.0177	Down
		CL5072.Contig2	Glycosyltransferase QUASIMODO1, putative [Ricinus communis] >gi|223539826|gb|EEF41406.1| Glycosyltransferase QUASIMODO1, putative [Ricinus communis]	Probable galacturonosyltransferase 6 OS=Arabidopsis thaliana GN=GAUT6 PE=2 SV=1	alpha-1,4-galacturonosyltransferase [EC:2.4.1.43]	3.361	3.1929	Down
		CL2971.Contig2	glycosyltransferase [Populus trichocarpa] >gi|222867096|gb|EEF04227.1| glycosyltransferase [Populus trichocarpa]	Probable galacturonosyltransferase 14 OS=Arabidopsis thaliana GN=GAUT14 PE=2 SV=1	alpha-1,4-galacturonosyltransferase [EC:2.4.1.43]	3.0432	2.8775	Down
		Unigene5762	glycosyltransferase [Panax notoginseng]	Dolichyl-diphosphooligosaccharide--protein glycosyltransferase subunit DAD1 OS=Solanum lycopersicum GN=DAD1 PE=3 SV=1	oligosaccharyltransferase complex subunit epsilon	126.776	119.574	Down
		CL8216.Contig1	glycosyltransferase UGT6 [Bupleurum chinense]	UDP-glycosyltransferase 85A5 OS=Arabidopsis thaliana GN=UGT85A5 PE=2 SV=1	cyanohydrin beta-glucosyltransferase [EC:2.4.1.85]	4.2612	3.9341	Down
		Unigene17876	glycosyltransferase UGT3 [Bupleurum chinense]	Anthocyanin 3'-O-beta-glucosyltransferase OS=Gentiana triflora PE=1 SV=1	UDP-glucosyl transferase 73C [EC:2.4.1.-]	29.7928	27.187	Down
		CL7423.Contig1	PREDICTED: probable xyloglucan glycosyltransferase 12-like [Solanum lycopersicum]	Probable xyloglucan glycosyltransferase 12 OS=Arabidopsis thaliana GN=CSLC12 PE=1 SV=1	--	10.5551	9.3465	Down
		Unigene19113	glycosyltransferase [Panax notoginseng]	Anthocyanidin 3-O-glucosyltransferase 1 OS=Manihot esculenta GN=GT1 PE=2 SV=1	--	14.4242	12.707	Down
		CL2652.Contig1	Exostosin-like protein [Medicago truncatula] >gi|355514333|gb|AES95956.1| Exostosin-like protein [Medicago truncatula]	Probable glycosyltransferase At5g03795 OS=Arabidopsis thaliana GN=At5g03795 PE=3 SV=2	--	11.6501	10.2382	Down
		Unigene19897	PREDICTED: probable beta-1,4-xylosyltransferase IRX10-like isoform 2 [Solanum lycopersicum]	Probable glycosyltransferase At5g25310 OS=Arabidopsis thaliana GN=At5g25310 PE=3 SV=2	lysosomal alpha-mannosidase [EC:3.2.1.24]	4.0392	3.5469	Down
		Unigene27441	glycosyltransferase [Populus trichocarpa] >gi|222867096|gb|EEF04227.1| glycosyltransferase [Populus trichocarpa]	Probable galacturonosyltransferase 14 OS=Arabidopsis thaliana GN=GAUT14 PE=2 SV=1	alpha-1,4-galacturonosyltransferase [EC:2.4.1.43]	2.495	2.1878	Down
		Unigene5859	unknown protein; 24137-33208 [Arabidopsis thaliana]	Dolichyl-diphosphooligosaccharide--protein glycosyltransferase subunit 4A OS=Arabidopsis thaliana GN=OST4A PE=3 SV=1	--	58.9014	50.9789	Down
		Unigene5384	cellulose synthase-like protein [Populus tomentosa]	Probable xyloglucan glycosyltransferase 12 OS=Arabidopsis thaliana GN=CSLC12 PE=1 SV=1	beta-mannan synthase [EC:2.4.1.32]	8.8925	7.5811	Down
		Unigene14738	PREDICTED: probable glycosyltransferase At5g03795 [Vitis vinifera]	Probable glycosyltransferase At5g03795 OS=Arabidopsis thaliana GN=At5g03795 PE=3 SV=2	--	19.5157	16.6314	Down
		CL2971.Contig3	glycosyltransferase [Populus trichocarpa] >gi|222867096|gb|EEF04227.1| glycosyltransferase [Populus trichocarpa]	Probable galacturonosyltransferase 14 OS=Arabidopsis thaliana GN=GAUT14 PE=2 SV=1	alpha-1,4-galacturonosyltransferase [EC:2.4.1.43]	3.9562	3.3353	Down
		CL7423.Contig3	PREDICTED: probable xyloglucan glycosyltransferase 12-like [Solanum lycopersicum]	Probable xyloglucan glycosyltransferase 12 OS=Arabidopsis thaliana GN=CSLC12 PE=1 SV=1	--	1.2744	1.0737	Down
		CL7417.Contig1	glycosyltransferase [Panax notoginseng]	--	protein glucosyltransferase [EC:2.4.1.-]	10.4347	8.7811	Down
		CL7102.Contig1	PREDICTED: probable xyloglucan glycosyltransferase 6-like [Solanum lycopersicum]	Probable xyloglucan glycosyltransferase 6 OS=Arabidopsis thaliana GN=CSLC6 PE=1 SV=1	--	6.4553	5.3049	Down
		CL4512.Contig1	PREDICTED: probable xyloglucan glycosyltransferase 6-like [Vitis vinifera]	Probable xyloglucan glycosyltransferase 6 OS=Arabidopsis thaliana GN=CSLC6 PE=1 SV=1	beta-mannan synthase [EC:2.4.1.32]	10.5632	8.6052	Down
		Unigene14940	PREDICTED: probable xyloglucan glycosyltransferase 12-like [Fragaria vesca subsp. vesca]	Probable xyloglucan glycosyltransferase 1 OS=Oryza sativa subsp. japonica GN=CSLC1 PE=2 SV=1	--	12.9689	10.3534	Down
		CL2424.Contig2	cellulose synthase-like protein [Populus tomentosa]	Probable xyloglucan glycosyltransferase 12 OS=Arabidopsis thaliana GN=CSLC12 PE=1 SV=1	beta-mannan synthase [EC:2.4.1.32]	14.5653	11.5524	Down
		Unigene33676	hypothetical protein PRUPE_ppa002285mg [Prunus persica]	Dolichyl-diphosphooligosaccharide--protein glycosyltransferase subunit 2 OS=Arabidopsis thaliana GN=RPN2 PE=2 SV=1	oligosaccharyltransferase complex subunit delta (ribophorin II)	7.3002	5.7569	Down
		CL9248.Contig1	PREDICTED: dolichyl-diphosphooligosaccharide--protein glycosyltransferase subunit STT3 [Vitis vinifera] >gi|297738771|emb|CBI28016.3| unnamed protein product [Vitis vinifera]	Dolichyl-diphosphooligosaccharide--protein glycosyltransferase subunit STT3A OS=Arabidopsis thaliana GN=STT3A PE=1 SV=1	dolichyl-diphosphooligosaccharide--protein glycosyltransferase [EC:2.4.1.119]	62.9643	49.4564	Down
		Unigene12520	glycosyltransferase [Panax notoginseng]	Dolichyl-diphosphooligosaccharide--protein glycosyltransferase subunit DAD1 OS=Solanum lycopersicum GN=DAD1 PE=3 SV=1	oligosaccharyltransferase complex subunit epsilon	36.8389	28.6009	Down
		CL832.Contig1	PREDICTED: probable beta-1,4-xylosyltransferase IRX10-like isoform 1 [Solanum lycopersicum]	Probable glycosyltransferase At5g25310 OS=Arabidopsis thaliana GN=At5g25310 PE=3 SV=2	--	0.1485	0.1139	Down
		CL2188.Contig3	beta 1,3-glycosyltransferase-like protein I [Solanum lycopersicum] >gi|20372915|emb|CAD30015.1| beta 1,3-glycosyltransferase-like protein I [Solanum lycopersicum]	Probable beta-1,3-galactosyltransferase 11 OS=Arabidopsis thaliana GN=B3GALT11 PE=2 SV=1	--	5.3106	4.0204	Down
		CL2188.Contig2	beta 1,3-glycosyltransferase-like protein I [Solanum lycopersicum] >gi|20372915|emb|CAD30015.1| beta 1,3-glycosyltransferase-like protein I [Solanum lycopersicum]	Probable beta-1,3-galactosyltransferase 11 OS=Arabidopsis thaliana GN=B3GALT11 PE=2 SV=1	--	4.9741	3.7656	Down
		Unigene27784	PREDICTED: probable xyloglucan glycosyltransferase 12-like [Solanum lycopersicum]	Probable xyloglucan glycosyltransferase 12 OS=Arabidopsis thaliana GN=CSLC12 PE=1 SV=1	beta-mannan synthase [EC:2.4.1.32]	7.2844	5.4529	Down
		Unigene21430	glycosyltransferase [Panax notoginseng]	UDP-glucose flavonoid 3-O-glucosyltransferase 6 OS=Fragaria ananassa GN=GT6 PE=1 SV=1	isoflavone 7-O-glucosyltransferase [EC:2.4.1.170]	27.361	20.4301	Down
		CL86.Contig2	hypothetical protein PRUPE_ppa002387mg [Prunus persica]	Probable glycosyltransferase At5g03795 OS=Arabidopsis thaliana GN=At5g03795 PE=3 SV=2	--	0.828	0.6118	Down
		Unigene12050	Glycosyltransferase QUASIMODO1, putative [Ricinus communis] >gi|223529623|gb|EEF31570.1| Glycosyltransferase QUASIMODO1, putative [Ricinus communis]	Probable galacturonosyltransferase 9 OS=Arabidopsis thaliana GN=GAUT9 PE=2 SV=1	alpha-1,4-galacturonosyltransferase [EC:2.4.1.43]	34.1815	24.9699	Down
		CL9505.Contig1	unnamed protein product [Vitis vinifera]	Probable glycosyltransferase At5g03795 OS=Arabidopsis thaliana GN=At5g03795 PE=3 SV=2	--	13.8215	9.9668	Down
		CL2254.Contig1	hypothetical protein PRUPE_ppa002395mg [Prunus persica]	Probable glycosyltransferase At5g03795 OS=Arabidopsis thaliana GN=At5g03795 PE=3 SV=2	--	1.2741	0.9124	Down
		Unigene4986	PREDICTED: dolichyl-diphosphooligosaccharide--protein glycosyltransferase subunit 1 [Vitis vinifera] >gi|296086009|emb|CBI31450.3| unnamed protein product [Vitis vinifera]	Dolichyl-diphosphooligosaccharide--protein glycosyltransferase subunit 1B OS=Arabidopsis thaliana GN=OST1B PE=2 SV=1	oligosaccharyltransferase complex subunit alpha (ribophorin I)	73.9007	52.7625	Down
		CL5737.Contig2	PREDICTED: dolichyl-diphosphooligosaccharide--protein glycosyltransferase subunit 1A-like [Solanum lycopersicum]	Dolichyl-diphosphooligosaccharide--protein glycosyltransferase subunit 1A OS=Arabidopsis thaliana GN=OST1A PE=2 SV=1	oligosaccharyltransferase complex subunit alpha (ribophorin I)	3.6213	2.5772	Down
		CL8216.Contig4	glycosyltransferase UGT6 [Bupleurum chinense]	UDP-glycosyltransferase 85A5 OS=Arabidopsis thaliana GN=UGT85A5 PE=2 SV=1	cytokinin-N-glucosyltransferase [EC:2.4.1.-]	8.9765	6.3773	Down
		Unigene4585	PREDICTED: probable glycosyltransferase At5g03795-like [Solanum lycopersicum]	Probable glycosyltransferase At5g03795 OS=Arabidopsis thaliana GN=At5g03795 PE=3 SV=2	--	9.495	6.7389	Down
		CL5737.Contig1	PREDICTED: dolichyl-diphosphooligosaccharide--protein glycosyltransferase subunit 1A-like [Solanum lycopersicum]	Dolichyl-diphosphooligosaccharide--protein glycosyltransferase subunit 1A OS=Arabidopsis thaliana GN=OST1A PE=2 SV=1	oligosaccharyltransferase complex subunit alpha (ribophorin I)	2.7749	1.9693	Down
		CL4405.Contig3	glycosyltransferase, CAZy family GT2 [Populus trichocarpa] >gi|222839184|gb|EEE77535.1| glycosyltransferase, CAZy family GT2 [Populus trichocarpa] >gi|429326498|gb|AFZ78589.1| cellulose synthase-like protein [Populus tomentosa]	Cellulose synthase-like protein D3 OS=Arabidopsis thaliana GN=CSLD3 PE=1 SV=1	1,4-beta-D-xylan synthase [EC:2.4.2.24]	1.8172	1.2568	Down
		Unigene30119	PREDICTED: probable xyloglucan glycosyltransferase 12 [Vitis vinifera]	Probable xyloglucan glycosyltransferase 12 OS=Arabidopsis thaliana GN=CSLC12 PE=1 SV=1	beta-mannan synthase [EC:2.4.1.32]	0.9952	0.6788	Down
		CL7417.Contig2	glycosyltransferase [Panax notoginseng]	--	protein glucosyltransferase [EC:2.4.1.-]	0.1994	0.136	Down
		CL832.Contig11	PREDICTED: probable beta-1,4-xylosyltransferase IRX10-like isoform 1 [Solanum lycopersicum]	Probable glycosyltransferase At5g25310 OS=Arabidopsis thaliana GN=At5g25310 PE=3 SV=2	--	0.1172	0.0799	Down
		CL7423.Contig2	PREDICTED: probable xyloglucan glycosyltransferase 12-like [Solanum lycopersicum]	Probable xyloglucan glycosyltransferase 12 OS=Arabidopsis thaliana GN=CSLC12 PE=1 SV=1	--	12.4046	8.3532	Down
		CL5072.Contig1	glycosyltransferase, CAZy family GT8 [Populus trichocarpa] >gi|222857077|gb|EEE94624.1| glycosyltransferase, CAZy family GT8 [Populus trichocarpa]	Probable galacturonosyltransferase 6 OS=Arabidopsis thaliana GN=GAUT6 PE=2 SV=1	alpha-1,4-galacturonosyltransferase [EC:2.4.1.43]	36.8056	24.6527	Down
		Unigene4360	PREDICTED: probable xyloglucan glycosyltransferase 12 [Vitis vinifera]	Probable xyloglucan glycosyltransferase 12 OS=Arabidopsis thaliana GN=CSLC12 PE=1 SV=1	beta-mannan synthase [EC:2.4.1.32]	4.7792	3.193	Down
		CL8092.Contig2	Tumor suppressor candidate, putative [Ricinus communis] >gi|223542371|gb|EEF43913.1| Tumor suppressor candidate, putative [Ricinus communis]	Probable dolichyl-diphosphooligosaccharide--protein glycosyltransferase subunit 3B OS=Arabidopsis thaliana GN=OST3B PE=2 SV=1	oligosaccharyltransferase complex subunit gamma	2.1924	1.4579	Down
		CL5404.Contig4	PREDICTED: dolichyl-diphosphooligosaccharide--protein glycosyltransferase 48 kDa subunit [Vitis vinifera] >gi|297741420|emb|CBI32551.3| unnamed protein product [Vitis vinifera]	Dolichyl-diphosphooligosaccharide--protein glycosyltransferase 48 kDa subunit OS=Arabidopsis thaliana GN=OST48 PE=2 SV=1	oligosaccharyltransferase complex subunit beta	31.3608	20.7149	Down
		Unigene16972	PREDICTED: probable glucuronosyltransferase Os02g0520750-like [Solanum lycopersicum]	Probable glycosyltransferase At5g11130 OS=Arabidopsis thaliana GN=At5g11120/At5g11130 PE=3 SV=2	--	7.6552	5.0346	Down
		CL10413.Contig1	PREDICTED: LOW QUALITY PROTEIN: probable glycosyltransferase At5g25310-like [Vitis vinifera]	Probable glycosyltransferase At3g07620 OS=Arabidopsis thaliana GN=At3g07620 PE=3 SV=1	--	1.6043	1.0551	Down
		CL5404.Contig2	PREDICTED: dolichyl-diphosphooligosaccharide--protein glycosyltransferase 48 kDa subunit [Vitis vinifera] >gi|297735209|emb|CBI17571.3| unnamed protein product [Vitis vinifera]	Dolichyl-diphosphooligosaccharide--protein glycosyltransferase 48 kDa subunit OS=Arabidopsis thaliana GN=OST48 PE=2 SV=1	oligosaccharyltransferase complex subunit beta	21.9553	14.2901	Down
		CL5114.Contig2	dolichyl glycosyltransferase [Cucumis melo subsp. melo]	Probable dolichyl pyrophosphate Glc1Man9GlcNAc2 alpha-1,3-glucosyltransferase OS=Arabidopsis thaliana GN=At2g44660 PE=2 SV=3	alpha-1,3-glucosyltransferase [EC:2.4.1.265]	5.4111	3.4962	Down
		Unigene4405	unnamed protein product [Vitis vinifera]	Probable glycosyltransferase At5g03795 OS=Arabidopsis thaliana GN=At5g03795 PE=3 SV=2	--	9.304	5.9623	Down
		Unigene10972	PREDICTED: dolichyl-diphosphooligosaccharide--protein glycosyltransferase subunit 2-like [Solanum lycopersicum]	Dolichyl-diphosphooligosaccharide--protein glycosyltransferase subunit 2 OS=Arabidopsis thaliana GN=RPN2 PE=2 SV=1	oligosaccharyltransferase complex subunit delta (ribophorin II)	204.712	130.226	Down
		CL1634.Contig2	glycosyltransferase, putative [Ricinus communis] >gi|223526710|gb|EEF28943.1| glycosyltransferase, putative [Ricinus communis]	--	--	3.2276	2.0099	Down
		Unigene12719	putative glycosyltransferase, partial [Aralia elata]	Crocetin glucosyltransferase 2 OS=Crocus sativus GN=GLT2 PE=1 SV=1	pathogen-inducible salicylic acid glucosyltransferase [EC:2.4.1.-]	11.4691	6.9246	Down
		CL5150.Contig1	hypothetical protein PRUPE_ppa001464mg [Prunus persica]	Dolichyl-diphosphooligosaccharide--protein glycosyltransferase subunit STT3A OS=Arabidopsis thaliana GN=STT3A PE=1 SV=1	dolichyl-diphosphooligosaccharide--protein glycosyltransferase [EC:2.4.1.119]	4.5319	2.7149	Down
		CL3307.Contig2	hypothetical protein PRUPE_ppa001886mg [Prunus persica]	Dolichyl-diphosphooligosaccharide--protein glycosyltransferase subunit STT3B OS=Arabidopsis thaliana GN=STT3B PE=1 SV=1	dolichyl-diphosphooligosaccharide--protein glycosyltransferase [EC:2.4.1.119]	64.0486	38.1725	Down
		CL9241.Contig1	Glycosyltransferase QUASIMODO1, putative [Ricinus communis] >gi|223546223|gb|EEF47725.1| Glycosyltransferase QUASIMODO1, putative [Ricinus communis]	Probable galacturonosyltransferase 11 OS=Arabidopsis thaliana GN=GAUT11 PE=2 SV=1	alpha-1,4-galacturonosyltransferase [EC:2.4.1.43]	11.4162	6.7196	Down
		CL832.Contig13	PREDICTED: probable glucuronosyltransferase Os03g0107900 [Vitis vinifera] >gi|302142755|emb|CBI19958.3| unnamed protein product [Vitis vinifera]	Probable glycosyltransferase At5g20260 OS=Arabidopsis thaliana GN=At5g20260 PE=3 SV=3	--	8.4638	4.9479	Down
		CL4512.Contig2	PREDICTED: probable xyloglucan glycosyltransferase 6-like [Vitis vinifera]	Probable xyloglucan glycosyltransferase 6 OS=Arabidopsis thaliana GN=CSLC6 PE=1 SV=1	beta-mannan synthase [EC:2.4.1.32]	8.1902	4.7466	Down
		CL8092.Contig1	PREDICTED: uncharacterized protein LOC100243455 [Vitis vinifera] >gi|147770840|emb|CAN74174.1| hypothetical protein VITISV_019222 [Vitis vinifera]	Probable dolichyl-diphosphooligosaccharide--protein glycosyltransferase subunit 3B OS=Arabidopsis thaliana GN=OST3B PE=2 SV=1	oligosaccharyltransferase complex subunit gamma	12.8624	7.4418	Down
		Unigene283	PREDICTED: probable glycosyltransferase At5g03795-like [Vitis vinifera] >gi|297738776|emb|CBI28021.3| unnamed protein product [Vitis vinifera]	--	--	8.8067	4.9754	Down
		Unigene33584	hypothetical protein PRUPE_ppa001886mg [Prunus persica]	Dolichyl-diphosphooligosaccharide--protein glycosyltransferase subunit STT3B OS=Arabidopsis thaliana GN=STT3B PE=1 SV=1	dolichyl-diphosphooligosaccharide--protein glycosyltransferase [EC:2.4.1.119]	35.6397	18.8797	Down
		CL10073.Contig2	Glycosyltransferase QUASIMODO1, putative [Ricinus communis] >gi|223527510|gb|EEF29635.1| Glycosyltransferase QUASIMODO1, putative [Ricinus communis]	Galacturonosyltransferase 8 OS=Arabidopsis thaliana GN=GAUT8 PE=1 SV=1	alpha-1,4-galacturonosyltransferase [EC:2.4.1.43]	29.0626	15.1476	Down
		CL10073.Contig3	Glycosyltransferase QUASIMODO1, putative [Ricinus communis] >gi|223527510|gb|EEF29635.1| Glycosyltransferase QUASIMODO1, putative [Ricinus communis]	Galacturonosyltransferase 8 OS=Arabidopsis thaliana GN=GAUT8 PE=1 SV=1	alpha-1,4-galacturonosyltransferase [EC:2.4.1.43]	40.0421	20.7735	Down
		CL86.Contig1	PREDICTED: uncharacterized protein LOC100268163 [Vitis vinifera]	Probable glycosyltransferase At5g03795 OS=Arabidopsis thaliana GN=At5g03795 PE=3 SV=2	--	4.3443	2.2222	Down
		CL3307.Contig1	hypothetical protein PRUPE_ppa001886mg [Prunus persica]	Dolichyl-diphosphooligosaccharide--protein glycosyltransferase subunit STT3B OS=Arabidopsis thaliana GN=STT3B PE=1 SV=1	dolichyl-diphosphooligosaccharide--protein glycosyltransferase [EC:2.4.1.119]	36.5246	18.5738	Down
		CL5478.Contig4	PREDICTED: xylogalacturonan beta-1,3-xylosyltransferase isoform 1 [Vitis vinifera]	Probable glycosyltransferase At3g42180 OS=Arabidopsis thaliana GN=At3g42180 PE=2 SV=2	--	7.6169	3.8198	Down
		CL8232.Contig1	secondary cell wall-related glycosyltransferase family 43 [Populus tremula x Populus tremuloides]	Probable beta-1,4-xylosyltransferase IRX9 OS=Arabidopsis thaliana GN=IRX9 PE=2 SV=1	--	4.2929	2.1227	Down
		CL10858.Contig3	glycosyltransferase, CAZy family GT8 [Populus trichocarpa] >gi|222844465|gb|EEE82012.1| glycosyltransferase, CAZy family GT8 [Populus trichocarpa]	Probable galacturonosyltransferase-like 7 OS=Arabidopsis thaliana GN=GATL7 PE=2 SV=1	alpha-1,4-galacturonosyltransferase [EC:2.4.1.43]	18.7841	9.2683	Down
		CL9522.Contig3	PREDICTED: putative glycosyltransferase 2 [Vitis vinifera]	Xyloglucan 6-xylosyltransferase OS=Arabidopsis thaliana GN=XT1 PE=1 SV=1	xyloglucan 6-xylosyltransferase [EC:2.4.2.39]	21.7786	10.4849	Down
		CL832.Contig6	PREDICTED: probable beta-1,4-xylosyltransferase IRX10-like isoform 1 [Solanum lycopersicum]	Probable glycosyltransferase At5g25310 OS=Arabidopsis thaliana GN=At5g25310 PE=3 SV=2	--	0.5181	0.2474	Down
		CL10413.Contig3	PREDICTED: probable glycosyltransferase At3g07620-like [Cucumis sativus]	Probable glycosyltransferase At3g07620 OS=Arabidopsis thaliana GN=At3g07620 PE=3 SV=1	--	2.4492	1.1501	Down
		CL10141.Contig2	catalytic, putative [Ricinus communis] >gi|223544320|gb|EEF45841.1| catalytic, putative [Ricinus communis]	Probable glycosyltransferase At5g03795 OS=Arabidopsis thaliana GN=At5g03795 PE=3 SV=2	--	0.445	0.2023	Down
		Unigene9324	TPA: hypothetical protein ZEAMMB73_288712 [Zea mays]	Dolichyl-diphosphooligosaccharide--protein glycosyltransferase subunit 4A OS=Oryza sativa subsp. japonica GN=OST4A PE=3 SV=1	--	19.7832	8.7105	Down
		CL832.Contig5	PREDICTED: probable beta-1,4-xylosyltransferase IRX10-like isoform 2 [Solanum lycopersicum]	Probable glycosyltransferase At5g25310 OS=Arabidopsis thaliana GN=At5g25310 PE=3 SV=2	--	0.6116	0.2607	Down
		CL10413.Contig2	PREDICTED: probable glycosyltransferase At3g07620-like [Cucumis sativus]	Probable glycosyltransferase At3g42180 OS=Arabidopsis thaliana GN=At3g42180 PE=2 SV=2	--	1.4122	0.5619	Down
		Unigene31852	PREDICTED: dolichyl-diphosphooligosaccharide--protein glycosyltransferase subunit STT3 [Vitis vinifera] >gi|297738771|emb|CBI28016.3| unnamed protein product [Vitis vinifera]	Dolichyl-diphosphooligosaccharide--protein glycosyltransferase subunit STT3A OS=Oryza sativa subsp. japonica GN=STT3A PE=2 SV=1	dolichyl-diphosphooligosaccharide--protein glycosyltransferase [EC:2.4.1.119]	25.8776	9.6032	Down
		CL1968.Contig1	glycosyltransferase UGT3 [Bupleurum chinense]	UDP-glucose flavonoid 3-O-glucosyltransferase 7 OS=Fragaria ananassa GN=GT7 PE=1 SV=1	UDP-glucosyl transferase 73C [EC:2.4.1.-]	23.4616	8.5858	Down
		CL5404.Contig1	PREDICTED: dolichyl-diphosphooligosaccharide--protein glycosyltransferase 48 kDa subunit [Vitis vinifera] >gi|297741420|emb|CBI32551.3| unnamed protein product [Vitis vinifera]	Dolichyl-diphosphooligosaccharide--protein glycosyltransferase 48 kDa subunit OS=Arabidopsis thaliana GN=OST48 PE=2 SV=1	oligosaccharyltransferase complex subunit beta	0.2172	0.0741	Down
		Unigene5426	glycosyltransferase [Panax notoginseng]	Glucomannan 4-beta-mannosyltransferase 2 OS=Arabidopsis thaliana GN=CSLA2 PE=2 SV=1	beta-mannan synthase [EC:2.4.1.32]	13.6774	3.9795	Down
		Unigene24885	glycosyltransferase [Panax notoginseng]	Xyloglucan glycosyltransferase 4 OS=Arabidopsis thaliana GN=CSLC4 PE=1 SV=1	beta-mannan synthase [EC:2.4.1.32]	11.2507	3.2077	Down
		CL9454.Contig4	glycosyltransferase [Panax notoginseng]	Xyloglucan glycosyltransferase 4 OS=Arabidopsis thaliana GN=CSLC4 PE=1 SV=1	beta-mannan synthase [EC:2.4.1.32]	10.3211	2.8952	Down
		CL3691.Contig3	hypothetical protein PRUPE_ppa004625mg [Prunus persica]	Probable glycosyltransferase At5g20260 OS=Arabidopsis thaliana GN=At5g20260 PE=3 SV=3	--	0.6946	0.1938	Down
		Unigene26168	glycosyl transferase [Populus trichocarpa] >gi|222868086|gb|EEF05217.1| glycosyl transferase [Populus trichocarpa] >gi|333951813|gb|AEG25424.1| glycosyltransferase GT43B [Populus trichocarpa]	Probable beta-1,4-xylosyltransferase IRX9 OS=Arabidopsis thaliana GN=IRX9 PE=2 SV=1	--	5.8098	1.5946	Down
		Unigene28472	PREDICTED: glycosyltransferase-like domain-containing protein 2-like [Solanum lycopersicum]	--	--	4.2028	1.0117	Down
		Unigene24917	hypothetical protein PRUPE_ppa001464mg [Prunus persica]	--	dolichyl-diphosphooligosaccharide--protein glycosyltransferase [EC:2.4.1.119]	10.0932	2.2666	Down
		Unigene23963	PREDICTED: uncharacterized glycosyltransferase AGO61-like [Vitis vinifera]	--	--	2.9244	0.1995	Down
		Unigene26059	PREDICTED: uncharacterized glycosyltransferase AGO61-like [Vitis vinifera]	--	--	7.5553	0	Down
		CL832.Contig10	PREDICTED: probable glucuronoxylan glucuronosyltransferase F8H-like [Cucumis sativus] >gi|449524512|ref|XP_004169266.1| PREDICTED: probable glucuronoxylan glucuronosyltransferase F8H-like [Cucumis sativus]	Probable glycosyltransferase At5g25310 OS=Arabidopsis thaliana GN=At5g25310 PE=3 SV=2	--	0	0	-
		CL832.Contig8	PREDICTED: probable glucuronoxylan glucuronosyltransferase F8H-like [Cucumis sativus] >gi|449524512|ref|XP_004169266.1| PREDICTED: probable glucuronoxylan glucuronosyltransferase F8H-like [Cucumis sativus]	Probable glycosyltransferase At5g25310 OS=Arabidopsis thaliana GN=At5g25310 PE=3 SV=2	--	0	0	-
	UGT (116 unigenes)	CL611.Contig5	PREDICTED: UDP-glycosyltransferase 85A1-like [Vitis vinifera]	UDP-glycosyltransferase 76E12 OS=Arabidopsis thaliana GN=UGT76E12 PE=2 SV=1	cytokinin-N-glucosyltransferase [EC:2.4.1.-]	0	0.1028	Up
		Unigene11105	PREDICTED: UDP-glycosyltransferase 85A2 [Vitis vinifera]	UDP-glycosyltransferase 85A5 OS=Arabidopsis thaliana GN=UGT85A5 PE=2 SV=1	cyanohydrin beta-glucosyltransferase [EC:2.4.1.85]	3.786	53.8024	Up
		CL11025.Contig1	putative anthocyanidine rhamnosyl-transferase [Capsicum annuum]	UDP-glycosyltransferase 91A1 OS=Arabidopsis thaliana GN=UGT91A1 PE=2 SV=1	hydroquinone glucosyltransferase [EC:2.4.1.218]	107.219	872.281	Up
		CL10841.Contig2	PREDICTED: UDP-glycosyltransferase 82A1 [Vitis vinifera]	UDP-glycosyltransferase 82A1 OS=Arabidopsis thaliana GN=UGT82A1 PE=2 SV=1	cytokinin-N-glucosyltransferase [EC:2.4.1.-]	2.6849	20.7912	Up
		CL4396.Contig1	PREDICTED: UDP-glycosyltransferase 73C3 [Vitis vinifera]	UDP-glycosyltransferase 73C3 OS=Arabidopsis thaliana GN=UGT73C3 PE=2 SV=1	UDP-glucosyl transferase 73C [EC:2.4.1.-]	24.4065	151.279	Up
		Unigene9502	glucosyltransferase [Nicotiana tabacum]	UDP-glycosyltransferase 75C1 OS=Arabidopsis thaliana GN=UGT75C1 PE=2 SV=2	anthocyanin 5-O-glucosyltransferase [EC:2.4.1.-]	119.843	715.204	Up
		Unigene30398	PREDICTED: UDP-glycosyltransferase 73C3 [Vitis vinifera]	UDP-glycosyltransferase 73C1 OS=Arabidopsis thaliana GN=UGT73C1 PE=2 SV=1	UDP-glucosyl transferase 73C [EC:2.4.1.-]	2.3239	13.8684	Up
		CL4396.Contig2	hypothetical protein PRUPE_ppa004786mg [Prunus persica]	UDP-glycosyltransferase 73C2 OS=Arabidopsis thaliana GN=UGT73C2 PE=3 SV=1	UDP-glucosyl transferase 73C [EC:2.4.1.-]	1.7876	8.8392	Up
		CL6543.Contig2	PREDICTED: UDP-glycosyltransferase 85A7-like [Cucumis sativus]	UDP-glycosyltransferase 85A1 OS=Arabidopsis thaliana GN=UGT85A1 PE=1 SV=1	UDP-glucosyltransferase BX9 [EC:2.4.1.202]	1.1281	4.9049	Up
		Unigene14439	PREDICTED: UDP-glycosyltransferase 84B1 [Vitis vinifera]	UDP-glycosyltransferase 84A3 OS=Arabidopsis thaliana GN=UGT84A3 PE=1 SV=1	UDP-glucose:(indol-3-yl)acetate beta-D-glucosyltransferase [EC:2.4.1.121]	4.2633	17.7881	Up
		CL5391.Contig1	PREDICTED: UDP-glycosyltransferase 85A2 isoform 1 [Vitis vinifera]	UDP-glycosyltransferase 85A5 OS=Arabidopsis thaliana GN=UGT85A5 PE=2 SV=1	cyanohydrin beta-glucosyltransferase [EC:2.4.1.85]	3.3774	14.0111	Up
		Unigene32043	PREDICTED: UDP-glycosyltransferase 73C3-like [Solanum lycopersicum]	UDP-glycosyltransferase 73D1 OS=Arabidopsis thaliana GN=UGT73D1 PE=3 SV=1	UDP-glucosyl transferase 73C [EC:2.4.1.-]	1.8802	7.694	Up
		CL523.Contig1	PREDICTED: UDP-glycosyltransferase 74E2-like [Vitis vinifera]	UDP-glycosyltransferase 74E1 OS=Arabidopsis thaliana GN=UGT74E1 PE=3 SV=1	pathogen-inducible salicylic acid glucosyltransferase [EC:2.4.1.-]	122.642	489.588	Up
		Unigene17309	glycosyltransferase [Panax notoginseng]	UDP-glycosyltransferase 71B2 OS=Arabidopsis thaliana GN=UGT71B2 PE=1 SV=1	isoflavone 7-O-glucosyltransferase [EC:2.4.1.170]	14.7766	57.2506	Up
		CL1858.Contig6	PREDICTED: UDP-glycosyltransferase 85A1 [Vitis vinifera] >gi|147781122|emb|CAN71907.1| hypothetical protein VITISV_038672 [Vitis vinifera]	UDP-glycosyltransferase 85A7 OS=Arabidopsis thaliana GN=UGT85A7 PE=2 SV=1	cyanohydrin beta-glucosyltransferase [EC:2.4.1.85]	0.1012	0.3797	Up
		CL9538.Contig2	UDP-glucosyltransferase, putative [Ricinus communis] >gi|223543365|gb|EEF44896.1| UDP-glucosyltransferase, putative [Ricinus communis]	UDP-glycosyltransferase 90A1 OS=Arabidopsis thaliana GN=UGT90A1 PE=2 SV=1	cis-zeatin O-glucosyltransferase [EC:2.4.1.215]	15.2665	56.7367	Up
		Unigene1728	PREDICTED: LOW QUALITY PROTEIN: UDP-glycosyltransferase 85A1-like [Vitis vinifera]	UDP-glycosyltransferase 85A5 OS=Arabidopsis thaliana GN=UGT85A5 PE=2 SV=1	cyanohydrin beta-glucosyltransferase [EC:2.4.1.85]	3.447	12.3104	Up
		CL9565.Contig4	PREDICTED: putative UDP-rhamnose:rhamnosyltransferase 1-like [Solanum lycopersicum]	UDP-glycosyltransferase 91A1 OS=Arabidopsis thaliana GN=UGT91A1 PE=2 SV=1	UDP-glucosyl transferase 73C [EC:2.4.1.-]	0.0497	0.1524	Up
		Unigene4835	PREDICTED: UDP-glycosyltransferase 74F2-like [Solanum lycopersicum]	UDP-glycosyltransferase 74F1 OS=Arabidopsis thaliana GN=UGT74F1 PE=1 SV=1	pathogen-inducible salicylic acid glucosyltransferase [EC:2.4.1.-]	3.5449	10.6784	Up
		Unigene15658	PREDICTED: UDP-glycosyltransferase 87A2-like [Vitis vinifera]	UDP-glycosyltransferase 87A2 OS=Arabidopsis thaliana GN=UGT87A2 PE=2 SV=1	pathogen-inducible salicylic acid glucosyltransferase [EC:2.4.1.-]	30.2053	90.0548	Up
		Unigene9144	UDP-glucosyltransferase family 1 protein [Citrus sinensis]	UDP-glycosyltransferase 84B1 OS=Arabidopsis thaliana GN=UGT84B1 PE=2 SV=1	UDP-glucose:(indol-3-yl)acetate beta-D-glucosyltransferase [EC:2.4.1.121]	5.6879	16.3761	Up
		Unigene3374	hypothetical protein PRUPE_ppa022356mg [Prunus persica]	UDP-glycosyltransferase 79B3 OS=Arabidopsis thaliana GN=UGT79B3 PE=2 SV=1	UDP-glucosyl transferase 73C [EC:2.4.1.-]	1.673	4.6678	Up
		Unigene34936	PREDICTED: UDP-glycosyltransferase 74E2 [Vitis vinifera] >gi|296084331|emb|CBI24719.3| unnamed protein product [Vitis vinifera]	--	--	0.83	2.2642	Up
		Unigene4603	Cis-zeatin O-glucosyltransferase [Medicago truncatula] >gi|355513971|gb|AES95594.1| Cis-zeatin O-glucosyltransferase [Medicago truncatula]	UDP-glycosyltransferase 73C3 OS=Arabidopsis thaliana GN=UGT73C3 PE=2 SV=1	UDP-glucosyl transferase 73C [EC:2.4.1.-]	8.0339	21.8884	Up
		CL10912.Contig2	PREDICTED: UDP-glycosyltransferase 85A1-like [Solanum lycopersicum]	UDP-glycosyltransferase 85A4 OS=Arabidopsis thaliana GN=UGT85A4 PE=2 SV=1	cyanohydrin beta-glucosyltransferase [EC:2.4.1.85]	0.4222	1.1231	Up
		CL9565.Contig3	PREDICTED: putative UDP-rhamnose:rhamnosyltransferase 1-like [Solanum lycopersicum]	UDP-glycosyltransferase 91A1 OS=Arabidopsis thaliana GN=UGT91A1 PE=2 SV=1	UDP-glucosyl transferase 73C [EC:2.4.1.-]	0.0516	0.132	Up
		Unigene34520	PREDICTED: UDP-glycosyltransferase 79B6-like [Glycine max]	UDP-glycosyltransferase 79B6 OS=Arabidopsis thaliana GN=UGT79B6 PE=2 SV=1	--	1.05	2.6854	Up
		CL611.Contig7	PREDICTED: UDP-glycosyltransferase 85A1-like [Vitis vinifera]	UDP-glycosyltransferase 85A2 OS=Arabidopsis thaliana GN=UGT85A2 PE=2 SV=1	cyanohydrin beta-glucosyltransferase [EC:2.4.1.85]	1.0009	2.4042	Up
		Unigene9580	PREDICTED: UDP-glycosyltransferase 74F2 [Vitis vinifera] >gi|147815573|emb|CAN68287.1| hypothetical protein VITISV_017016 [Vitis vinifera]	UDP-glycosyltransferase 74E2 OS=Arabidopsis thaliana GN=UGT74E2 PE=1 SV=1	pathogen-inducible salicylic acid glucosyltransferase [EC:2.4.1.-]	3.8948	9.2973	Up
		CL611.Contig2	PREDICTED: UDP-glycosyltransferase 85A1 [Vitis vinifera]	UDP-glycosyltransferase 85A2 OS=Arabidopsis thaliana GN=UGT85A2 PE=2 SV=1	cyanohydrin beta-glucosyltransferase [EC:2.4.1.85]	0.1475	0.352	Up
		Unigene6434	glycosyltransferase UGT95A1 [Hieracium pilosella]	UDP-glycosyltransferase 73B4 OS=Arabidopsis thaliana GN=UGT73B4 PE=2 SV=1	pathogen-inducible salicylic acid glucosyltransferase [EC:2.4.1.-]	8.4249	19.5297	Up
		Unigene1311	PREDICTED: UDP-glycosyltransferase 85A2 isoform 1 [Vitis vinifera]	UDP-glycosyltransferase 85A7 OS=Arabidopsis thaliana GN=UGT85A7 PE=2 SV=1	cyanohydrin beta-glucosyltransferase [EC:2.4.1.85]	1.3449	3.0268	Up
		CL611.Contig3	PREDICTED: UDP-glycosyltransferase 85A1 [Vitis vinifera]	UDP-glycosyltransferase 76E12 OS=Arabidopsis thaliana GN=UGT76E12 PE=2 SV=1	cytokinin-N-glucosyltransferase [EC:2.4.1.-]	5.2816	11.1995	Up
		Unigene7509	PREDICTED: UDP-glycosyltransferase 85A1 [Vitis vinifera]	UDP-glycosyltransferase 76C1 OS=Arabidopsis thaliana GN=UGT76C1 PE=1 SV=1	cytokinin-N-glucosyltransferase [EC:2.4.1.-]	10.0299	21.1028	Up
		Unigene8966	PREDICTED: UDP-glycosyltransferase 85A3-like [Solanum lycopersicum]	UDP-glycosyltransferase 85A7 OS=Arabidopsis thaliana GN=UGT85A7 PE=2 SV=1	cyanohydrin beta-glucosyltransferase [EC:2.4.1.85]	5.3196	11.129	Up
		CL1858.Contig5	PREDICTED: UDP-glycosyltransferase 85A1 [Vitis vinifera] >gi|147781122|emb|CAN71907.1| hypothetical protein VITISV_038672 [Vitis vinifera]	UDP-glycosyltransferase 85A7 OS=Arabidopsis thaliana GN=UGT85A7 PE=2 SV=1	cyanohydrin beta-glucosyltransferase [EC:2.4.1.85]	0.2846	0.5824	Up
		CL10569.Contig2	hypothetical protein VITISV_041695 [Vitis vinifera]	UDP-glycosyltransferase 73C3 OS=Arabidopsis thaliana GN=UGT73C3 PE=2 SV=1	UDP-glucosyl transferase 73C [EC:2.4.1.-]	10.8336	22.1289	Up
		Unigene21171	predicted protein [Populus trichocarpa] >gi|224112637|ref|XP_002316247.1| predicted protein [Populus trichocarpa] >gi|222865287|gb|EEF02418.1| predicted protein [Populus trichocarpa] >gi|222869921|gb|EEF07052.1| predicted protein [Populus trichocarpa]	UDP-glycosyltransferase 76F1 OS=Arabidopsis thaliana GN=UGT76F1 PE=2 SV=1	cytokinin-N-glucosyltransferase [EC:2.4.1.-]	39.1252	78.3538	Up
		CL1858.Contig3	PREDICTED: UDP-glycosyltransferase 85A1 [Vitis vinifera] >gi|147781122|emb|CAN71907.1| hypothetical protein VITISV_038672 [Vitis vinifera]	UDP-glycosyltransferase 85A2 OS=Arabidopsis thaliana GN=UGT85A2 PE=2 SV=1	cyanohydrin beta-glucosyltransferase [EC:2.4.1.85]	0.5187	1.026	Up
		CL5794.Contig4	UDP-glucosyltransferase [Panax notoginseng]	UDP-glycosyltransferase 92A1 OS=Arabidopsis thaliana GN=UGT92A1 PE=2 SV=1	UDP-glucosyl transferase 73C [EC:2.4.1.-]	7.2344	14.0881	Up
		Unigene1008	hypothetical protein PRUPE_ppa005106mg [Prunus persica]	UDP-glycosyltransferase 91C1 OS=Arabidopsis thaliana GN=UGT91C1 PE=2 SV=1	UDP-glucosyl transferase 73C [EC:2.4.1.-]	34.6444	67.3711	Up
		Unigene18934	PREDICTED: LOW QUALITY PROTEIN: UDP-glycosyltransferase 85A1-like [Vitis vinifera]	UDP-glycosyltransferase 85A7 OS=Arabidopsis thaliana GN=UGT85A7 PE=2 SV=1	cyanohydrin beta-glucosyltransferase [EC:2.4.1.85]	4.8415	9.2869	Up
		Unigene20977	PREDICTED: UDP-glycosyltransferase 73C2 [Vitis vinifera]	UDP-glycosyltransferase 73C7 OS=Arabidopsis thaliana GN=UGT73C7 PE=2 SV=1	UDP-glucosyl transferase 73C [EC:2.4.1.-]	5.0011	9.4706	Up
		CL611.Contig1	PREDICTED: UDP-glycosyltransferase 85A1-like [Vitis vinifera]	UDP-glycosyltransferase 85A3 OS=Arabidopsis thaliana GN=UGT85A3 PE=2 SV=2	cyanohydrin beta-glucosyltransferase [EC:2.4.1.85]	31.5926	56.5608	Up
		CL5046.Contig1	PREDICTED: UDP-glycosyltransferase 73D1 [Vitis vinifera] >gi|147799194|emb|CAN65772.1| hypothetical protein VITISV_030408 [Vitis vinifera]	UDP-glycosyltransferase 73D1 OS=Arabidopsis thaliana GN=UGT73D1 PE=3 SV=1	UDP-glucosyl transferase 73C [EC:2.4.1.-]	4.0747	7.1808	Up
		CL611.Contig6	PREDICTED: UDP-glycosyltransferase 85A1-like [Vitis vinifera]	UDP-glycosyltransferase 85A2 OS=Arabidopsis thaliana GN=UGT85A2 PE=2 SV=1	cyanohydrin beta-glucosyltransferase [EC:2.4.1.85]	2.3723	4.1401	Up
		Unigene9673	PREDICTED: UDP-glycosyltransferase 74F2 [Vitis vinifera] >gi|147815573|emb|CAN68287.1| hypothetical protein VITISV_017016 [Vitis vinifera]	UDP-glycosyltransferase 74F2 OS=Arabidopsis thaliana GN=UGT74F2 PE=1 SV=1	pathogen-inducible salicylic acid glucosyltransferase [EC:2.4.1.-]	5.9389	9.6419	Up
		Unigene32767	predicted protein [Populus trichocarpa] >gi|222868565|gb|EEF05696.1| predicted protein [Populus trichocarpa]	UDP-glycosyltransferase 74E1 OS=Arabidopsis thaliana GN=UGT74E1 PE=3 SV=1	pathogen-inducible salicylic acid glucosyltransferase [EC:2.4.1.-]	4.2399	6.6822	Up
		Unigene17468	flavonoid glucoyltransferase UGT73E2 [Antirrhinum majus]	UDP-glycosyltransferase 73C1 OS=Arabidopsis thaliana GN=UGT73C1 PE=2 SV=1	UDP-glucosyl transferase 73C [EC:2.4.1.-]	4.7481	7.4773	Up
		Unigene31133	PREDICTED: LOW QUALITY PROTEIN: UDP-glycosyltransferase 79B1-like [Cucumis sativus]	UDP-glycosyltransferase 79B7 OS=Arabidopsis thaliana GN=UGT79B7 PE=2 SV=1	--	2.132	3.2717	Up
		Unigene4889	PREDICTED: UDP-glycosyltransferase 74E2 [Vitis vinifera]	UDP-glycosyltransferase 74F2 OS=Arabidopsis thaliana GN=UGT74F2 PE=1 SV=1	pathogen-inducible salicylic acid glucosyltransferase [EC:2.4.1.-]	16.6396	25.1979	Up
		CL5391.Contig2	PREDICTED: UDP-glycosyltransferase 85A2 [Vitis vinifera]	UDP-glycosyltransferase 85A2 OS=Arabidopsis thaliana GN=UGT85A2 PE=2 SV=1	cyanohydrin beta-glucosyltransferase [EC:2.4.1.85]	1.2994	1.8906	Up
		CL10546.Contig2	hypothetical protein PRUPE_ppa026557mg [Prunus persica]	UDP-glycosyltransferase 85A1 OS=Arabidopsis thaliana GN=UGT85A1 PE=1 SV=1	cyanohydrin beta-glucosyltransferase [EC:2.4.1.85]	16.7262	24.0669	Up
		CL8216.Contig3	glycosyltransferase UGT6 [Bupleurum chinense]	UDP-glycosyltransferase 85A3 OS=Arabidopsis thaliana GN=UGT85A3 PE=2 SV=2	cyanohydrin beta-glucosyltransferase [EC:2.4.1.85]	10.9459	15.6846	Up
		CL1858.Contig8	PREDICTED: UDP-glycosyltransferase 85A7-like [Solanum lycopersicum]	UDP-glycosyltransferase 85A4 OS=Arabidopsis thaliana GN=UGT85A4 PE=2 SV=1	cyanohydrin beta-glucosyltransferase [EC:2.4.1.85]	1.7552	2.5139	Up
		CL9565.Contig1	conserved hypothetical protein [Ricinus communis] >gi|223526616|gb|EEF28863.1| conserved hypothetical protein [Ricinus communis]	UDP-glycosyltransferase 91A1 OS=Arabidopsis thaliana GN=UGT91A1 PE=2 SV=1	UDP-glucosyl transferase 73C [EC:2.4.1.-]	3.0006	4.0658	Up
		Unigene13872	predicted protein [Populus trichocarpa] >gi|222874494|gb|EEF11625.1| predicted protein [Populus trichocarpa]	UDP-glycosyltransferase 74F2 OS=Arabidopsis thaliana GN=UGT74F2 PE=1 SV=1	pathogen-inducible salicylic acid glucosyltransferase [EC:2.4.1.-]	5.9942	8.0192	Up
		Unigene17941	UDP-glucosyltransferase, putative [Ricinus communis] >gi|223538199|gb|EEF39808.1| UDP-glucosyltransferase, putative [Ricinus communis]	UDP-glycosyltransferase 79B3 OS=Arabidopsis thaliana GN=UGT79B3 PE=2 SV=1	UDP-glucosyl transferase 73C [EC:2.4.1.-]	14.7897	19.4034	Up
		CL8437.Contig1	PREDICTED: UDP-glycosyltransferase 86A1-like [Solanum lycopersicum]	UDP-glycosyltransferase 86A1 OS=Arabidopsis thaliana GN=UGT86A1 PE=2 SV=1	UDP-glucose:(indol-3-yl)acetate beta-D-glucosyltransferase [EC:2.4.1.121]	15.0396	19.2326	Up
		CL10841.Contig1	hypothetical protein PRUPE_ppa016262mg [Prunus persica]	UDP-glycosyltransferase 82A1 OS=Arabidopsis thaliana GN=UGT82A1 PE=2 SV=1	cytokinin-N-glucosyltransferase [EC:2.4.1.-]	0.9479	1.1979	Up
		Unigene2037	PREDICTED: UDP-glycosyltransferase 87A2-like [Solanum lycopersicum]	UDP-glycosyltransferase 87A2 OS=Arabidopsis thaliana GN=UGT87A2 PE=2 SV=1	pathogen-inducible salicylic acid glucosyltransferase [EC:2.4.1.-]	4.0914	5.1424	Up
		CL5794.Contig3	UDP-glucosyltransferase [Panax notoginseng]	UDP-glycosyltransferase 92A1 OS=Arabidopsis thaliana GN=UGT92A1 PE=2 SV=1	--	5.0835	6.1294	Up
		CL9036.Contig1	PREDICTED: UDP-glycosyltransferase 91A1-like [Solanum lycopersicum]	UDP-glycosyltransferase 91A1 OS=Arabidopsis thaliana GN=UGT91A1 PE=2 SV=1	UDP-glucosyl transferase 73C [EC:2.4.1.-]	1.6458	1.9784	Up
		Unigene18343	hypothetical protein PRUPE_ppa018626mg [Prunus persica]	UDP-glycosyltransferase 89B1 OS=Arabidopsis thaliana GN=UGT89B1 PE=2 SV=2	UDP-glucosyl transferase 73C [EC:2.4.1.-]	5.0049	5.5952	Up
		CL1858.Contig2	PREDICTED: UDP-glycosyltransferase 85A1 [Vitis vinifera] >gi|147781122|emb|CAN71907.1| hypothetical protein VITISV_038672 [Vitis vinifera]	UDP-glycosyltransferase 85A2 OS=Arabidopsis thaliana GN=UGT85A2 PE=2 SV=1	cyanohydrin beta-glucosyltransferase [EC:2.4.1.85]	1.0927	1.1925	Up
		CL611.Contig4	PREDICTED: UDP-glycosyltransferase 85A1 [Vitis vinifera]	UDP-glycosyltransferase 85A2 OS=Arabidopsis thaliana GN=UGT85A2 PE=2 SV=1	cyanohydrin beta-glucosyltransferase [EC:2.4.1.85]	1.6326	1.7278	Up
		Unigene17076	UDP-glucosyltransferase, putative [Ricinus communis] >gi|223527833|gb|EEF29929.1| UDP-glucosyltransferase, putative [Ricinus communis]	UDP-glycosyltransferase 74E2 OS=Arabidopsis thaliana GN=UGT74E2 PE=1 SV=1	pathogen-inducible salicylic acid glucosyltransferase [EC:2.4.1.-]	22.9333	23.7745	Up
		CL5305.Contig1	PREDICTED: UDP-glycosyltransferase 88A1-like isoform 1 [Vitis vinifera]	Anthocyanidin 5,3-O-glucosyltransferase OS=Rosa hybrid cultivar GN=RhGT1 PE=2 SV=1	isoflavone 7-O-glucosyltransferase [EC:2.4.1.170]	0.4677	0.4785	Up
		CL8216.Contig2	glycosyltransferase UGT6 [Bupleurum chinense]	UDP-glycosyltransferase 85A5 OS=Arabidopsis thaliana GN=UGT85A5 PE=2 SV=1	cyanohydrin beta-glucosyltransferase [EC:2.4.1.85]	0.5679	0.581	Up
		Unigene2376	putative glycosyltransferase, partial [Aralia elata]	UDP-glycosyltransferase 74E1 OS=Arabidopsis thaliana GN=UGT74E1 PE=3 SV=1	pathogen-inducible salicylic acid glucosyltransferase [EC:2.4.1.-]	5.3534	5.4767	Up
		CL2427.Contig3	UDP-glucose glucosyltransferase [Gardenia jasminoides]	UDP-glycosyltransferase 75D1 OS=Arabidopsis thaliana GN=UGT75D1 PE=2 SV=2	anthocyanin 5-O-glucosyltransferase [EC:2.4.1.-]	36.7337	37.4228	Up
		CL10912.Contig1	PREDICTED: UDP-glycosyltransferase 85A1-like [Solanum lycopersicum]	UDP-glycosyltransferase 85A5 OS=Arabidopsis thaliana GN=UGT85A5 PE=2 SV=1	cyanohydrin beta-glucosyltransferase [EC:2.4.1.85]	17.8123	17.5943	Down
		Unigene17766	hypothetical protein PRUPE_ppa024271mg [Prunus persica]	UDP-glycosyltransferase 89B1 OS=Arabidopsis thaliana GN=UGT89B1 PE=2 SV=2	UDP-glucosyl transferase 73C [EC:2.4.1.-]	2.8403	2.7737	Down
		CL5305.Contig6	PREDICTED: UDP-glycosyltransferase 88A1-like isoform 1 [Vitis vinifera]	Anthocyanidin 5,3-O-glucosyltransferase OS=Rosa hybrid cultivar GN=RhGT1 PE=2 SV=1	isoflavone 7-O-glucosyltransferase [EC:2.4.1.170]	1.3937	1.314	Down
		CL5794.Contig2	UDP-glucosyltransferase [Panax notoginseng]	UDP-glycosyltransferase 92A1 OS=Arabidopsis thaliana GN=UGT92A1 PE=2 SV=1	hydroquinone glucosyltransferase [EC:2.4.1.218]	14.6223	13.7571	Down
		CL523.Contig3	PREDICTED: UDP-glycosyltransferase 74E2 [Vitis vinifera] >gi|296084331|emb|CBI24719.3| unnamed protein product [Vitis vinifera]	UDP-glycosyltransferase 74E2 OS=Arabidopsis thaliana GN=UGT74E2 PE=1 SV=1	pathogen-inducible salicylic acid glucosyltransferase [EC:2.4.1.-]	19.2305	18.0499	Down
		CL8216.Contig1	glycosyltransferase UGT6 [Bupleurum chinense]	UDP-glycosyltransferase 85A5 OS=Arabidopsis thaliana GN=UGT85A5 PE=2 SV=1	cyanohydrin beta-glucosyltransferase [EC:2.4.1.85]	4.2612	3.9341	Down
		CL1858.Contig1	PREDICTED: UDP-glycosyltransferase 85A1 [Vitis vinifera] >gi|147781122|emb|CAN71907.1| hypothetical protein VITISV_038672 [Vitis vinifera]	UDP-glycosyltransferase 85A2 OS=Arabidopsis thaliana GN=UGT85A2 PE=2 SV=1	cyanohydrin beta-glucosyltransferase [EC:2.4.1.85]	13.7439	11.6303	Down
		CL11162.Contig1	hypothetical protein PRUPE_ppa019614mg [Prunus persica]	UDP-glycosyltransferase 76E2 OS=Arabidopsis thaliana GN=UGT76E2 PE=2 SV=1	cytokinin-N-glucosyltransferase [EC:2.4.1.-]	20.0452	16.906	Down
		CL5794.Contig1	UDP-glucosyltransferase [Panax notoginseng]	UDP-glycosyltransferase 92A1 OS=Arabidopsis thaliana GN=UGT92A1 PE=2 SV=1	UDP-glucosyl transferase 73C [EC:2.4.1.-]	7.6068	6.2868	Down
		Unigene4581	PREDICTED: UDP-glycosyltransferase 85A2 isoform 1 [Vitis vinifera]	UDP-glycosyltransferase 85A2 OS=Arabidopsis thaliana GN=UGT85A2 PE=2 SV=1	cyanohydrin beta-glucosyltransferase [EC:2.4.1.85]	10.6552	8.7693	Down
		Unigene14234	UDP-glucose:glucosyltransferase [Lycium barbarum]	UDP-glycosyltransferase 74E2 OS=Arabidopsis thaliana GN=UGT74E2 PE=1 SV=1	pathogen-inducible salicylic acid glucosyltransferase [EC:2.4.1.-]	2.9049	2.3774	Down
		CL1858.Contig9	PREDICTED: UDP-glycosyltransferase 85A2 [Vitis vinifera]	UDP-glycosyltransferase 85A2 OS=Arabidopsis thaliana GN=UGT85A2 PE=2 SV=1	cyanohydrin beta-glucosyltransferase [EC:2.4.1.85]	2.1764	1.7722	Down
		Unigene10598	predicted protein [Populus trichocarpa] >gi|222850374|gb|EEE87921.1| predicted protein [Populus trichocarpa]	UDP-glycosyltransferase 87A2 OS=Arabidopsis thaliana GN=UGT87A2 PE=2 SV=1	sinapate 1-glucosyltransferase [EC:2.4.1.120]	5.6762	4.6114	Down
		CL5305.Contig7	PREDICTED: UDP-glycosyltransferase 88A1-like isoform 1 [Vitis vinifera]	Anthocyanidin 5,3-O-glucosyltransferase OS=Rosa hybrid cultivar GN=RhGT1 PE=2 SV=1	isoflavone 7-O-glucosyltransferase [EC:2.4.1.170]	2.4012	1.9473	Down
		CL523.Contig2	PREDICTED: UDP-glycosyltransferase 74E2-like [Vitis vinifera]	UDP-glycosyltransferase 74E2 OS=Arabidopsis thaliana GN=UGT74E2 PE=1 SV=1	pathogen-inducible salicylic acid glucosyltransferase [EC:2.4.1.-]	9.6285	7.5965	Down
		Unigene21783	hypothetical protein PRUPE_ppa018626mg [Prunus persica]	UDP-glycosyltransferase 89B1 OS=Arabidopsis thaliana GN=UGT89B1 PE=2 SV=2	UDP-glucosyl transferase 73C [EC:2.4.1.-]	2.6054	2.0334	Down
		CL9565.Contig2	conserved hypothetical protein [Ricinus communis] >gi|223526616|gb|EEF28863.1| conserved hypothetical protein [Ricinus communis]	UDP-glycosyltransferase 91A1 OS=Arabidopsis thaliana GN=UGT91A1 PE=2 SV=1	UDP-glucosyl transferase 73C [EC:2.4.1.-]	3.5399	2.7497	Down
		Unigene23249	PREDICTED: UDP-glycosyltransferase 91A1-like [Cucumis sativus]	UDP-glycosyltransferase 91A1 OS=Arabidopsis thaliana GN=UGT91A1 PE=2 SV=1	--	8.7095	6.7088	Down
		CL2427.Contig1	UDP-glucose glucosyltransferase [Gardenia jasminoides]	UDP-glycosyltransferase 75C1 OS=Arabidopsis thaliana GN=UGT75C1 PE=2 SV=2	anthocyanin 5-O-glucosyltransferase [EC:2.4.1.-]	6.4414	4.9318	Down
		CL5658.Contig3	PREDICTED: UDP-glycosyltransferase 74E1-like [Solanum lycopersicum]	UDP-glycosyltransferase 74E2 OS=Arabidopsis thaliana GN=UGT74E2 PE=1 SV=1	pathogen-inducible salicylic acid glucosyltransferase [EC:2.4.1.-]	1.1173	0.8277	Down
		Unigene5632	hypothetical protein PRUPE_ppa024271mg [Prunus persica]	UDP-glycosyltransferase 89A2 OS=Arabidopsis thaliana GN=UGT89A2 PE=2 SV=1	UDP-glucosyl transferase 73C [EC:2.4.1.-]	6.4553	4.6778	Down
		CL2427.Contig2	UDP-glucose glucosyltransferase [Gardenia jasminoides]	UDP-glycosyltransferase 75C1 OS=Arabidopsis thaliana GN=UGT75C1 PE=2 SV=2	anthocyanin 5-O-glucosyltransferase [EC:2.4.1.-]	22.0049	15.7226	Down
		CL9036.Contig2	putative anthocyanidine rhamnosyl-transferase [Capsicum annuum]	UDP-glycosyltransferase 91A1 OS=Arabidopsis thaliana GN=UGT91A1 PE=2 SV=1	coniferyl-alcohol glucosyltransferase [EC:2.4.1.111]	13.926	9.906	Down
		CL8216.Contig4	glycosyltransferase UGT6 [Bupleurum chinense]	UDP-glycosyltransferase 85A5 OS=Arabidopsis thaliana GN=UGT85A5 PE=2 SV=1	cytokinin-N-glucosyltransferase [EC:2.4.1.-]	8.9765	6.3773	Down
		Unigene28475	PREDICTED: UDP-glycosyltransferase 92A1-like [Vitis vinifera]	Crocetin glucosyltransferase 3 OS=Crocus sativus GN=GLT3 PE=1 SV=1	--	3.2276	2.0638	Down
		Unigene25616	PREDICTED: UDP-glycosyltransferase 76F1 [Vitis vinifera]	UDP-glycosyltransferase 76C3 OS=Arabidopsis thaliana GN=UGT76C3 PE=3 SV=1	cytokinin-N-glucosyltransferase [EC:2.4.1.-]	5.6958	3.4962	Down
		CL1858.Contig7	PREDICTED: UDP-glycosyltransferase 85A1 [Vitis vinifera] >gi|147781122|emb|CAN71907.1| hypothetical protein VITISV_038672 [Vitis vinifera]	UDP-glycosyltransferase 85A2 OS=Arabidopsis thaliana GN=UGT85A2 PE=2 SV=1	cyanohydrin beta-glucosyltransferase [EC:2.4.1.85]	6.2101	3.7279	Down
		CL6543.Contig1	PREDICTED: UDP-glycosyltransferase 85A2 [Vitis vinifera]	UDP-glycosyltransferase 85A1 OS=Arabidopsis thaliana GN=UGT85A1 PE=1 SV=1	cyanohydrin beta-glucosyltransferase [EC:2.4.1.85]	31.0013	18.3762	Down
		Unigene27053	flavonol 3-O-glucosyltransferase [Paeonia lactiflora]	UDP-glycosyltransferase 85A4 OS=Arabidopsis thaliana GN=UGT85A4 PE=2 SV=1	cyanohydrin beta-glucosyltransferase [EC:2.4.1.85]	11.104	6.2885	Down
		CL5305.Contig8	PREDICTED: UDP-glycosyltransferase 88A1-like isoform 1 [Vitis vinifera]	Anthocyanidin 5,3-O-glucosyltransferase OS=Rosa hybrid cultivar GN=RhGT1 PE=2 SV=1	isoflavone 7-O-glucosyltransferase [EC:2.4.1.170]	0.3631	0.2026	Down
		CL10569.Contig1	hypothetical protein VITISV_041695 [Vitis vinifera]	UDP-glycosyltransferase 73C3 OS=Arabidopsis thaliana GN=UGT73C3 PE=2 SV=1	UDP-glucosyl transferase 73C [EC:2.4.1.-]	26.642	14.7394	Down
		Unigene23037	PREDICTED: UDP-glycosyltransferase 74E2 [Vitis vinifera] >gi|296084331|emb|CBI24719.3| unnamed protein product [Vitis vinifera]	UDP-glycosyltransferase 74E2 OS=Arabidopsis thaliana GN=UGT74E2 PE=1 SV=1	pathogen-inducible salicylic acid glucosyltransferase [EC:2.4.1.-]	7.3472	3.8975	Down
		CL10546.Contig1	hypothetical protein PRUPE_ppa026557mg [Prunus persica]	UDP-glycosyltransferase 85A5 OS=Arabidopsis thaliana GN=UGT85A5 PE=2 SV=1	cyanohydrin beta-glucosyltransferase [EC:2.4.1.85]	2.0483	1.0478	Down
		CL5794.Contig5	UDP-glucosyltransferase [Panax notoginseng]	UDP-glycosyltransferase 92A1 OS=Arabidopsis thaliana GN=UGT92A1 PE=2 SV=1	--	3.9449	2.0179	Down
		CL5658.Contig2	PREDICTED: UDP-glycosyltransferase 74E1-like [Solanum lycopersicum]	UDP-glycosyltransferase 74E2 OS=Arabidopsis thaliana GN=UGT74E2 PE=1 SV=1	pathogen-inducible salicylic acid glucosyltransferase [EC:2.4.1.-]	5.095	2.5499	Down
		CL5305.Contig4	PREDICTED: UDP-glycosyltransferase 88A1-like isoform 1 [Vitis vinifera]	Anthocyanidin 5,3-O-glucosyltransferase OS=Rosa hybrid cultivar GN=RhGT1 PE=2 SV=1	isoflavone 7-O-glucosyltransferase [EC:2.4.1.170]	2.1118	1.0098	Down
		Unigene940	hypothetical protein PRUPE_ppa004601mg [Prunus persica]	UDP-glycosyltransferase 92A1 OS=Arabidopsis thaliana GN=UGT92A1 PE=2 SV=1	UDP-glucosyl transferase 73C [EC:2.4.1.-]	5.6589	2.7016	Down
		Unigene12538	putative UDP-glycosyltransferase 92A, partial [Aralia elata]	Crocetin glucosyltransferase 3 OS=Crocus sativus GN=GLT3 PE=1 SV=1	UDP-glucosyl transferase 73C [EC:2.4.1.-]	19.1458	8.9492	Down
		CL5658.Contig1	PREDICTED: UDP-glycosyltransferase 74E1-like [Solanum lycopersicum]	UDP-glycosyltransferase 74E2 OS=Arabidopsis thaliana GN=UGT74E2 PE=1 SV=1	pathogen-inducible salicylic acid glucosyltransferase [EC:2.4.1.-]	5.485	2.4734	Down
		Unigene28569	hypothetical protein VITISV_034564 [Vitis vinifera]	UDP-glycosyltransferase 92A1 OS=Arabidopsis thaliana GN=UGT92A1 PE=2 SV=1	coniferyl-alcohol glucosyltransferase [EC:2.4.1.111]	3.4534	1.4547	Down
		Unigene13030	PREDICTED: UDP-glycosyltransferase 73C3 [Vitis vinifera]	UDP-glycosyltransferase 73C3 OS=Arabidopsis thaliana GN=UGT73C3 PE=2 SV=1	UDP-glucosyl transferase 73C [EC:2.4.1.-]	6.6757	2.4586	Down
		CL1858.Contig4	PREDICTED: UDP-glycosyltransferase 85A2 [Vitis vinifera]	UDP-glycosyltransferase 85A5 OS=Arabidopsis thaliana GN=UGT85A5 PE=2 SV=1	pathogen-inducible salicylic acid glucosyltransferase [EC:2.4.1.-]	21.8153	7.9875	Down
		CL5305.Contig2	PREDICTED: UDP-glycosyltransferase 88A1-like isoform 1 [Vitis vinifera]	Anthocyanidin 5,3-O-glucosyltransferase OS=Rosa hybrid cultivar GN=RhGT1 PE=2 SV=1	isoflavone 7-O-glucosyltransferase [EC:2.4.1.170]	3.0962	1.0043	Down
		Unigene28062	predicted protein [Populus trichocarpa] >gi|222868165|gb|EEF05296.1| predicted protein [Populus trichocarpa]	UDP-glycosyltransferase 85A5 OS=Arabidopsis thaliana GN=UGT85A5 PE=2 SV=1	pathogen-inducible salicylic acid glucosyltransferase [EC:2.4.1.-]	6.9578	1.4236	Down
		Unigene24956	UDP-glycosyltransferase 1 [Linum usitatissimum]	UDP-glycosyltransferase 85A5 OS=Arabidopsis thaliana GN=UGT85A5 PE=2 SV=1	cyanohydrin beta-glucosyltransferase [EC:2.4.1.85]	4.4957	0.7076	Down

## Sheet: Table S6
Table S6 The whole length sequence of promising candidate unigenes
Gene name	Unigene ID	Sequence	Unigene length (bp)
PgSS	CL4699.Contig1	CTAAACTCGTCCAAACAATAATCACTATTCCATTTCCATTTCACATTCCAACTGCAAATTAAGCAAGCTTATTATAAAATATATAGAGAGAAAATGGGAAGTTTGGGGGCAATTCTGAAGCATCCGGAAGATTTCTATCCGTTGTTGAAGCTTAAATTTGCGGCTAGGCATGCGGAAAAGCAGATCCCTCCGGAGCCACACTGGGCCTTCTGTTACTCTATGCTTCATAAAGTTTCTCGAAGTTTCGGCCTCGTCATTCAACAGCTCGGCCCTCAGCTCCGCGATGCTGTATGCATTTTTTATTTGGTTCTTCGAGCACTTGACACTGTTGAGGATGACACAAGTATACCTACAGAGGTTAAAGTACCTATCTTGATGGCTTTTCATCGCCACATATAT…	1486
	CL4699.Contig2	CATTTTTCAGTTCTCACCAACTGCAAATCAAGCAATCTTATCTAAAAACAGGTATATATATATATAATATAGATACAGAGAGAAAAAATGGGAAGTTTGGGGGCAATTCTGAAGCATCCGGAAGATTTCTATCCATTGTTGAAGCTCAAAATAGCGGCGAGGCATGCGGAAAAACAGATTCCTTCGGAGCCACACTGGGCTTTCTGTTACTCTATGCTTCATAAGGTTTCTCGAAGCTTCGGCCTCGTCATTCAACAGCTCGGACCTCAGCTTCGCGATGCTGTATGCATTTTTTATTTGGTTCTTCGAGCACTTGACACTGTTGAGGATGACACAAGCATATCTACAGAGGTTAAAGTACCAATATTGATGGCTTTTCATCGCCACATATATGATAAC…	1683
	CL4699.Contig3	CTAAACTCGTCCAAACAATAATCACTATTCCATTTCCATTTCACATTCCAACTGCAAATTAAGCAAGCTTATTATAAAATATATAGAGAGAAAATGGGAAGTTTGGGGGCAATTCTGAAGCATCCGGAAGATTTCTATCCGTTGTTGAAGCTTAAATTTGCGGCTAGGCATGCGGAAAAGCAGATCCCTCCGGAGCCACACTGGGCCTTCTGTTACTCTATGCTTCATAAAGTTTCTCGAAGTTTCGGCCTCGTCATTCAACAGCTCGGCCCTCAGCTCCGCGATGCTGTATGCATTTTTTATTTGGTTCTTCGAGCACTTGACACTGTTGAGGATGACACAAGTATACCTACAGAGGTTAAAGTACCTATCTTGATGGCTTTTCATCGCCACATATAT…	1689
	CL4699.Contig4	CATTTTTCAGTTCTCACCAACTGCAAATCAAGCAATCTTATCTAAGTAAGGAAAATTCGTTTAAAAAATCTCGTTGTCCCTTTTCTTTTCAATTGATTGATTTAGATCTGTTCATCTTTACCAAAATTTGCTTGTAGAAACAGGTATATATATATATAATATAGATACAGAGAGAAAAAATGGGAAGTTTGGGGGCAATTCTGAAGCATCCGGAAGATTTCTATCCATTGTTGAAGCTCAAAATAGCGGCGAGGCATGCGGAAAAACAGATTCCTTCGGAGCCACACTGGGCTTTCTGTTACTCTATGCTTCATAAGGTTTCTCGAAGCTTCGGCCTCGTCATTCAACAGCTCGGACCTCAGCTTCGCGATGCTGTATGCATTTTTTATTTGGTTCTTC…	1775
	CL4699.Contig5	CATTTTTCAGTTCTCACCAACTGCAAATCAAGCAATCTTATCTAAGTAAGGAAAATTCGTTTAAAAAATCTCGTTGTCCCTTTTCTTTTCAATTGATTGATTTAGATCTGTTCATCTTTACCAAAATTTGCTTGTAGAAACAGGTATATATATATATAATATAGATACAGAGAGAAAAAATGGGAAGTTTGGGGGCAATTCTGAAGCATCCGGACGATTTCTATCCATTGTTGAAGCTCAAAATAGCGGCGAGGCATGCGGAAAAACAGATTCCTTCGGAGCCACACTGGGCTTTCTGTTACTCTATGCTTCATAAGGTTTCTCGAAGCTTCGGCCTCGTCATTCAACAGCTCGGACCTCAGCTTCGCGATGCTGTATGCATTTTTTATTTGGTTCTTC…	1377
	CL4699.Contig6	CATTTTTCAGTTCTCACCAACTGCAAATCAAGCAATCTTATCTAAAAACAGGTATATATATATATAATATAGATACAGAGAGAAAAAATGGGAAGTTTGGGGGCAATTCTGAAGCATCCGGACGATTTCTATCCATTGTTGAAGCTCAAAATAGCGGCGAGGCATGCGGAAAAACAGATTCCTTCGGAGCCACACTGGGCTTTCTGTTACTCTATGCTTCATAAGGTTTCTCGAAGCTTCGGCCTCGTCATTCAACAGCTCGGACCTCAGCTTCGCGATGCTGTATGCATTTTTTATTTGGTTCTTCGAGCACTTGACACTGTTGAGGATGACACAAGCATATCTACAGAGGTTAAAGTACCAATAGTGATGGCTTTTCATTGCCACATATATGATAAC…	1285
	CL4699.Contig7	CATTTTTCAGTTCTCACCAACTGCAAATCAAGCAATCTTATCTAAAAACAGGTATATATATATATAATATAGATACAGAGAGAAAAAATGGGAAGTTTGGGGGCAATTCTGAAGCATCCGGAAGATTTCTATCCATTGTTGAAGCTCAAAATAGCGGCGAGGCATGCGGAAAAACAGATTCCTTCGGAGCCACACTGGGCTTTCTGTTACTCTATGCTTCATAAGGTTTCTCGAAGCTTCGGCCTCGTCATTCAACAGCTCGGACCTCAGCTTCGCGATGCTGTATGCATTTTTTATTTGGTTCTTCGAGCACTTGACACTGTTGAGGATGACACAAGCATATCTACAGAGGTTAAAGTACCAATATTGATGGCTTTTCATCGCCACATATATGATAAC…	1486
	CL4699.Contig8	CATTTTTCAGTTCTCACCAACTGCAAATCAAGCAATCTTATCTAAGTAAGGAAAATTCGTTTAAAAAATCTCGTTGTCCCTTTTCTTTTCAATTGATTGATTTAGATCTGTTCATCTTTACCAAAATTTGCTTGTAGAAACAGGTATATATATATATAATATAGATACAGAGAGAAAAAATGGGAAGTTTGGGGGCAATTCTGAAGCATCCGGAAGATTTCTATCCATTGTTGAAGCTCAAAATAGCGGCGAGGCATGCGGAAAAACAGATTCCTTCGGAGCCACACTGGGCTTTCTGTTACTCTATGCTTCATAAGGTTTCTCGAAGCTTCGGCCTCGTCATTCAACAGCTCGGACCTCAGCTTCGCGATGCTGTATGCATTTTTTATTTGGTTCTTC…	1578
	CL4699.Contig9	CATTTTTCAGTTCTCACCAACTGCAAATCAAGCAATCTTATCTAAAAACAGGTATATATATATATAATATAGATACAGAGAGAAAAAATGGGAAGTTTGGGGGCAATTCTGAAGCATCCGGACGATTTCTATCCATTGTTGAAGCTCAAAATAGCGGCGAGGCATGCGGAAAAACAGATTCCTTCGGAGCCACACTGGGCTTTCTGTTACTCTATGCTTCATAAGGTTTCTCGAAGCTTCGGCCTCGTCATTCAACAGCTCGGACCTCAGCTTCGCGATGCTGTATGCATTTTTTATTTGGTTCTTCGAGCACTTGACACTGTTGAGGATGACACAAGCATATCTACAGAGGTTAAAGTACCAATAGTGATGGCTTTTCATTGCCACATATATGATAAC…	1466
	CL4699.Contig10	CATTTTTCAGTTCTCACCAACTGCAAATCAAGCAATCTTATCTAAGTAAGGAAAATTCGTTTAAAAAATCTCGTTGTCCCTTTTCTTTTCAATTGATTGATTTAGATCTGTTCATCTTTACCAAAATTTGCTTGTAGAAACAGGTATATATATATATAATATAGATACAGAGAGAAAAAATGGGAAGTTTGGGGGCAATTCTGAAGCATCCGGACGATTTCTATCCATTGTTGAAGCTCAAAATAGCGGCGAGGCATGCGGAAAAACAGATTCCTTCGGAGCCACACTGGGCTTTCTGTTACTCTATGCTTCATAAGGTTTCTCGAAGCTTCGGCCTCGTCATTCAACAGCTCGGACCTCAGCTTCGCGATGCTGTATGCATTTTTTATTTGGTTCTTC…	1702
PgPDR	CL1490.Contig1	CCGAGTTTCTTGATTCAATATTACATTGCCATTTGGTTGTTCTCTATTATTAGTCTCATTCATGCACACCACAAGCATGGAACAAATAACAATCCATCTGTGGTTCTGATTGTTTGAATTTCTTGGCCCAAAGTTCATGCTACACTTAAAAACTTTTTTGGAAGGTTGCAAGTGATGTATAGAAAGCAAGCAACAGTATAATGGCATTAAAAACTAGCATTACAAGTCCTTCAATGTGGAGGACTAATGGTATGGAAGTTGATATTCACAATCTTGGACTCAAGGAGAAGAAAGATTTACTAGAGAGGCTAGTCAGAGTTGCTGAAGAAGATAATGAAAAGTTTTTGTACAAGCTCAGGGATCGAGTTGATAGAGTTGGAATTGAATTGCCCACGATTG…	2606
	CL1490.Contig4	CACCGAGTTTCTTGATTCAATATTACATTGCCATTTGGTTGTTCTCTATTATTAGTCTCATTCATGCACACCACAAGCATGGAACAAATAACAATCCATCTGTGGTTCTGATTGTTTGAATTTCTTGGCCCAAAGTTCATGCTACACTTAAAAACTTTTTTGGAAGGTTGCAAGTGATGTATAGAAAGCAAGCAACAGTATAATGGCATTAAAAACTAGCATTACAAGTCCTTCAATGTGGAGGACTAATGGTATGGAAGTTGATATTCACAATCTTGGACTCAAGGAGAAGAAAGATTTACTAGAGAGGCTAGTCAGAGTTGCTGAAGAAGATAATGAGAAATTCTTGTTGAAGCTCAGGGATCGAATTGATAGAGTTGGAGTTGATTTGCCCACAAT…	2538
	Unigene12975	TCCGTCATGGATCATCAAGATCCCCATTTCATTTGTTGAAGTTGCCCTGTGGGTATTTCTCACTTACTATGTTATTGGATATGATCCAAATGCTGGAAGATTGTTTAAGCAGTACTTACTACTCGTACTCGTCAACCAGATGGCTTCTGCATTATTCCGATTGCTTGGGGCAGTGGGTAGGAATATGATTGTTGCAAACACATTTGGTGCATTTGCAGTGCTTATTCTTTATGCACTCGGAGGCTTTATCCTATCACGAGTGAATGTAAAGAAGTGGTGGTTATGGGGTTTCTGGTCATCACCAATTATGTATGGGATGAATGCAATTGCAGTGAATGAATTTCTTGGGGATCAATGGAATAATTTTCTCCCAAATACAACAGAACCACTAGGAGTTGC…	2767
	CL6349.Contig7	CCAGGGTAGCTCGATCGATCGCTAGCAATGGCCAAAGTGATAGGTAGAGATGATAATATTATAGGGTCTCTAAGAAGGGAAGTGACAGATTAGGGACAATATTCTTAGTTCCTCCTTCCCTCTCTATGCGTCGAGTTTTCGGAGTGATGATCATACTCACGATGACGATGAAGACGAGTTACAATGGGCAGCAATTGAGAGACTGCAAACACAAGAAAATTTCATTCTTGGTCATGACAAGATGAAAATTATGAAGAATGATCATGTCGTCCTTGGATCAGCTGTAGAAAGGCGTGCATTTATCGACAAACTTTTGAAGAAAATTGAGGAAGATAATCACAGTTTGTTACTCAAACAGAGACGAAGAATTGACAGAGTGGGTCTGGAATTATCTACTGT…	4350
	CL6349.Contig8	CCAGGGTAGCTCGATCGATCGCTAGCAATGGCCAAAGTGATAGGTAGAGATGATAATATTATAGGGTCTCTAAGAAGGGAAGTGACAGATTAGGGACAATATTCTTAGTTCCTCCTTCCCTCTCTATGCGTCGAGTTTTCGGAGTGATGATCATACTCACGATGACGATGAAGACGAGTTACAATGGGCAGCAATTGAGAGACTGCAAACACAAGAAAATTTCATTCTTGGTCATGACAAGATGAAAATTATGAAGAATGATCATGTCGTCCTTGGATCAGCTGTAGAAAGGCGTGCATTTATCGACAAACTTTTGAAGAAAATTGAGGAAGATAATCACAGTTTGTTACTCAAACAGAGACGAAGAATTGACAGAGTGGGTCTGGAATTATCTACTGT…	4246
	CL6349.Contig9	CCAGGGTAGCTCGATCGATCGCTAGCAATGGCCAAAGTGATAGGTAGAGATGATAATATTATAGGGTCTCTAAGAAGGGAAGTGACAGATTAGGGACAATATTCTTAGTTCCTCCTTCCCTCTCTATGCGTCGAGTTTTCGGAGTGATGATCATACTCACGATGACGATGAAGACGAGTTACAATGGGCAGCAATTGAGAGACTGCAAACACAAGAAAATTTCATTCTTGGTCATGACAAGATGAAAATTATGAAGAATGATCATGTCGTCCTTGGATCAGCTGTAGAAAGGCGTGCATTTATCGACAAACTTTTGAAGAAAATTGAGGAAGATAATCACAGTTTGTTACTCAAACAGAGACGAAGAATTGACAGAGTGGGTCTGGAATTATCTACTGT…	4327
	CL10813.Contig15	ATGATGATGATGATGAAGATGAAGGAGATAGAGTTGATGCTAAAGGGAAGCGATTAATTGATGTTACTAAGCTTGGTTCTTTAGAAAGGCATTTGTTCATTGAGAAGCTCATCAAGCACATTGAGAACGACAACCTTCGTTTGTTGCACAAACTTAGAAAACGAATAGACAAAGTTGGTGTAAAGTTACCCACTGTTGAGGTGAGATATAAAAATATGCACGTGCAAGCAGAGTGTGAGGTAGTTCATGGCAAGCCCCTCCCTACTCTATGGAATTCTCTCCAAAGCATGATTTCTGACATTACCAAGCTTACTGGATTCAAGTCAAAAGAGGCCAAGATAAACATCATTAATAATGTCAGTGGTATCATTAAGCCTGGAAGAATGACTTTACTGCTTG…	3337
	CL10813.Contig18	ATGATGATGATGATGAAGATGAAGGAGATAGAGTTGATGCTAAAGGGAAGCGATTAATTGATGTTACTAAGCTTGGTTCTTTAGAAAGGCATTTGTTCATTGAGAAGCTCATCAAGCACATTGAGAACGACAACCTTCGTTTGTTGCACAAACTTAGAAAACGAATAGACAAAGTTGGTGTAAAGTTACCCACTGTTGAGGTGAGATATAAAAATATGCACGTGCAAGCAGAGTGTGAGGTAGTTCATGGCAAGCCCCTCCCTACTCTATGGAATTCTCTCCAAAGCATGATTTCTGACATTACCAAGCTTACTGGATTCAAGTCAAAAGAGGCCAAGATAAACATCATTAATAATGTCAGTGGTATCATTAAGCCTGGAAGAATGACTTTACTGCTTG…	3341
	CL10813.Contig20	ATGATGATGATGATGAAGATGAAGGAGATAGAGTTGATGCTAAAGGGAAGCGATTAATTGATGTTACTAAGCTTGGTTCTTTAGAAAGGCATTTGTTCATTGAGAAGCTCATCAAGCACATTGAGAACGACAACCTTCGTTTGTTGCACAAACTTAGAAAACGAATAGACAAAGTTGGTGTAAAGTTACCCACTGTTGAGGTGAGATATAAAAATATGCACGTGCAAGCAGAGTGTGAGGTAGTTCATGGCAAGCCCCTCCCTACTCTATGGAATTCTCTCCAAAGCATGATTTCTGACATTACCAAGCTTACTGGATTCAAGTCAAAAGAGGCCAAGATAAACATCATTAATAATGTCAGTGGTATCATTAAGCCTGGAAGAATGACTTTACTGCTTG…	3258
	CL10813.Contig22	ATGATGATGATGATGAAGATGAAGGAGATAGAGTTGATGCTAAAGGGAAGCGATTAATTGATGTTACTAAGCTTGGTTCTTTAGAAAGGCATTTGTTCATTGAGAAGCTCATCAAGCACATTGAGAACGACAACCTTCGTTTGTTGCACAAACTTAGAAAACGAATAGACAAAGTTGGTGTAAAGTTACCCACTGTTGAGGTGAGATATAAAAATATGCACGTGCAAGCAGAGTGTGAGGTAGTTCATGGCAAGCCCCTCCCTACTCTATGGAATTCTCTCCAAAGCATGATTTCTGACATTACCAAGCTTACTGGATTCAAGTCAAAAGAGGCCAAGATAAACATCATTAATAATGTCAGTGGTATCATTAAGCCTGGAAGAATGACTTTACTGCTTG…	3172
	CL10813.Contig23	ATGATGATGATGATGAAGATGAAGGAGATAGAGTTGATGCTAAAGGGAAGCGATTAATTGATGTTACTAAGCTTGGTTCTTTAGAAAGGCATTTGTTCATTGAGAAGCTCATCAAGCACATTGAGAACGACAACCTTCGTTTGTTGCACAAACTTAGAAAACGAATAGACAAAGTTGGTGTAAAGTTACCCACTGTTGAGGTGAGATATAAAAATATGCACGTGCAAGCAGAGTGTGAGGTAGTTCATGGCAAGCCCCTCCCTACTCTATGGAATTCTCTCCAAAGCATGATTTCTGACATTACCAAGCTTACTGGATTCAAGTCAAAAGAGGCCAAGATAAACATCATTAATAATGTCAGTGGTATCATTAAGCCTGGAAGAATGACTTTACTGCTTG…	3011
	CL10813.Contig24	ATGATGATGATGATGAAGATGAAGGAGATAGAGTTGATGCTAAAGGGAAGCGATTAATTGATGTTACTAAGCTTGGTTCTTTAGAAAGGCATTTGTTCATTGAGAAGCTCATCAAGCACATTGAGAACGACAACCTTCGTTTGTTGCACAAACTTAGAAAACGAATAGACAAAGTTGGTGTAAAGTTACCCACTGTTGAGGTGAGATATAAAAATATGCACGTGCAAGCAGAGTGTGAGGTAGTTCATGGCAAGCCCCTCCCTACTCTATGGAATTCTCTCCAAAGCATGATTTCTGACATTACCAAGCTTACTGGATTCAAGTCAAAAGAGGCCAAGATAAACATCATTAATAATGTCAGTGGTATCATTAAGCCTGGAAGAATGACTTTACTGCTTG…	3255

## Sheet: Table S7
Table S7 List of ABC unigenes (from ABCA to ABCG) along with their expression
ABC Subfamily	Unigene ID	Nr annotation	Swiss-prot annotation	KEGG annotation	FPKM (Pg-Con)	FPKM (Pg-MeJA)	Expression
ABCA	CL6669.Contig2	PREDICTED: ABC transporter A family member 2 isoform 1 [Vitis vinifera] >gi|297734007|emb|CBI15254.3| unnamed protein product [Vitis vinifera]	ABC transporter A family member 2 OS=Arabidopsis thaliana GN=ABCA2 PE=2 SV=1	ATP-binding cassette, subfamily A (ABC1), member 3	0.063	0.4515	Up
	Unigene9971	abc transporter, putative [Ricinus communis] >gi|223550656|gb|EEF52143.1| abc transporter, putative [Ricinus communis]	ABC transporter A family member 2 OS=Arabidopsis thaliana GN=ABCA2 PE=2 SV=1	--	0.7	3.1031	Up
	CL6669.Contig1	PREDICTED: ABC transporter A family member 2 isoform 1 [Vitis vinifera] >gi|297734007|emb|CBI15254.3| unnamed protein product [Vitis vinifera]	ABC transporter A family member 2 OS=Arabidopsis thaliana GN=ABCA2 PE=2 SV=1	ATP-binding cassette, subfamily A (ABC1), member 3	0.1478	0.4348	Up
	CL6669.Contig4	PREDICTED: ABC transporter A family member 2 isoform 1 [Vitis vinifera] >gi|297734007|emb|CBI15254.3| unnamed protein product [Vitis vinifera]	ABC transporter A family member 2 OS=Arabidopsis thaliana GN=ABCA2 PE=2 SV=1	ATP-binding cassette, subfamily A (ABC1), member 3	0.4151	1.1079	Up
	Unigene29931	PREDICTED: ABC transporter A family member 2 isoform 1 [Vitis vinifera] >gi|297734007|emb|CBI15254.3| unnamed protein product [Vitis vinifera]	ABC transporter A family member 2 OS=Arabidopsis thaliana GN=ABCA2 PE=2 SV=1	ATP-binding cassette, subfamily A (ABC1), member 3	0.2084	0.5331	Up
	Unigene12283	PREDICTED: ABC transporter A family member 7-like [Cucumis sativus] >gi|449477292|ref|XP_004154983.1| PREDICTED: ABC transporter A family member 7-like [Cucumis sativus]	ABC transporter A family member 3 OS=Arabidopsis thaliana GN=ABCA3 PE=2 SV=3	--	10.6866	26.7246	Up
	Unigene18249	PREDICTED: ABC transporter A family member 7-like [Solanum lycopersicum]	ABC transporter A family member 10 OS=Arabidopsis thaliana GN=ABCA10 PE=1 SV=2	--	12.3662	30.3148	Up
	Unigene15623	unnamed protein product [Vitis vinifera]	ABC transporter A family member 7 OS=Arabidopsis thaliana GN=ABCA7 PE=1 SV=2	ATP-binding cassette, subfamily A (ABC1), member 3	2.9509	6.1103	Up
	CL127.Contig8	unnamed protein product [Vitis vinifera]	ABC transporter A family member 7 OS=Arabidopsis thaliana GN=ABCA7 PE=1 SV=2	ATP-binding cassette, subfamily A (ABC1), member 3	0.9311	1.5875	Up
	CL127.Contig15	unnamed protein product [Vitis vinifera]	ABC transporter A family member 7 OS=Arabidopsis thaliana GN=ABCA7 PE=1 SV=2	ATP-binding cassette, subfamily A (ABC1), member 3	1.0111	1.7142	Up
	CL127.Contig19	unnamed protein product [Vitis vinifera]	ABC transporter A family member 7 OS=Arabidopsis thaliana GN=ABCA7 PE=1 SV=2	ATP-binding cassette, subfamily A (ABC1), member 3	0.7699	1.2117	Up
	CL127.Contig5	unnamed protein product [Vitis vinifera]	ABC transporter A family member 7 OS=Arabidopsis thaliana GN=ABCA7 PE=1 SV=2	ATP-binding cassette, subfamily A (ABC1), member 3	0.9481	1.401	Up
	CL127.Contig4	PREDICTED: DNA-binding protein SMUBP-2-like [Vitis vinifera]	ABC transporter A family member 7 OS=Arabidopsis thaliana GN=ABCA7 PE=1 SV=2	solute carrier family 32 (vesicular inhibitory amino acid transporter)	2.7337	3.5274	Up
	CL127.Contig9	unnamed protein product [Vitis vinifera]	ABC transporter A family member 7 OS=Arabidopsis thaliana GN=ABCA7 PE=1 SV=2	ATP-binding cassette, subfamily A (ABC1), member 3	1.0628	1.2943	Up
	CL127.Contig11	hypothetical protein PRUPE_ppa003922mg [Prunus persica]	ABC transporter A family member 7 OS=Arabidopsis thaliana GN=ABCA7 PE=1 SV=2	solute carrier family 32 (vesicular inhibitory amino acid transporter)	2.9456	3.5585	Up
	CL127.Contig3	unnamed protein product [Vitis vinifera]	ABC transporter A family member 7 OS=Arabidopsis thaliana GN=ABCA7 PE=1 SV=2	solute carrier family 32 (vesicular inhibitory amino acid transporter)	8.3267	9.8184	Up
	CL127.Contig12	unnamed protein product [Vitis vinifera]	ABC transporter A family member 7 OS=Arabidopsis thaliana GN=ABCA7 PE=1 SV=2	solute carrier family 32 (vesicular inhibitory amino acid transporter)	3.1454	3.4072	Up
	CL127.Contig2	PREDICTED: DNA-binding protein SMUBP-2-like [Vitis vinifera]	ABC transporter A family member 7 OS=Arabidopsis thaliana GN=ABCA7 PE=1 SV=2	solute carrier family 32 (vesicular inhibitory amino acid transporter)	4.7058	4.9055	Up
	CL127.Contig17	unnamed protein product [Vitis vinifera]	ABC transporter A family member 7 OS=Arabidopsis thaliana GN=ABCA7 PE=1 SV=2	solute carrier family 32 (vesicular inhibitory amino acid transporter)	2.514	2.6072	Up
	CL127.Contig10	unnamed protein product [Vitis vinifera]	ABC transporter A family member 7 OS=Arabidopsis thaliana GN=ABCA7 PE=1 SV=2	solute carrier family 32 (vesicular inhibitory amino acid transporter)	2.6233	2.6838	Up
	CL127.Contig14	unnamed protein product [Vitis vinifera]	ABC transporter A family member 7 OS=Arabidopsis thaliana GN=ABCA7 PE=1 SV=2	solute carrier family 32 (vesicular inhibitory amino acid transporter)	2.4834	2.5406	Up
	CL127.Contig13	unnamed protein product [Vitis vinifera]	ABC transporter A family member 7 OS=Arabidopsis thaliana GN=ABCA7 PE=1 SV=2	solute carrier family 32 (vesicular inhibitory amino acid transporter)	3.3806	3.4228	Up
	CL127.Contig18	unnamed protein product [Vitis vinifera]	ABC transporter A family member 7 OS=Arabidopsis thaliana GN=ABCA7 PE=1 SV=2	solute carrier family 32 (vesicular inhibitory amino acid transporter)	3.0404	3.009	Down
	CL127.Contig6	unnamed protein product [Vitis vinifera]	ABC transporter A family member 7 OS=Arabidopsis thaliana GN=ABCA7 PE=1 SV=2	solute carrier family 32 (vesicular inhibitory amino acid transporter)	2.9126	2.8212	Down
	CL127.Contig7	PREDICTED: vacuolar amino acid transporter 1-like [Solanum lycopersicum]	ABC transporter A family member 7 OS=Arabidopsis thaliana GN=ABCA7 PE=1 SV=2	solute carrier family 32 (vesicular inhibitory amino acid transporter)	3.0672	2.9246	Down
	CL127.Contig16	PREDICTED: vacuolar amino acid transporter 1-like [Solanum lycopersicum]	ABC transporter A family member 7 OS=Arabidopsis thaliana GN=ABCA7 PE=1 SV=2	solute carrier family 32 (vesicular inhibitory amino acid transporter)	3.0158	2.8525	Down
	CL6353.Contig2	PREDICTED: ABC transporter A family member 1-like [Solanum lycopersicum]	ABC transporter A family member 1 OS=Arabidopsis thaliana GN=ABCA1 PE=2 SV=2	ATP-binding cassette, subfamily A (ABC1), member 3	0.7919	0.7365	Down
	Unigene3315	PREDICTED: ABC transporter A family member 1-like [Vitis vinifera]	ABC transporter A family member 1 OS=Arabidopsis thaliana GN=ABCA1 PE=2 SV=2	ATP-binding cassette, subfamily A (ABC1), member 3	25.8833	23.1288	Down
	CL6353.Contig1	unnamed protein product [Vitis vinifera]	ABC transporter A family member 1 OS=Arabidopsis thaliana GN=ABCA1 PE=2 SV=2	ATP-binding cassette, subfamily A (ABC1), member 3	5.0982	3.1144	Down
	Unigene11041	unnamed protein product [Vitis vinifera]	ABC transporter A family member 1 OS=Arabidopsis thaliana GN=ABCA1 PE=2 SV=2	ATP-binding cassette, subfamily A (ABC1), member 3	19.5672	11.0387	Down
ABCB	CL1604.Contig1	PREDICTED: putative receptor-like protein kinase At1g72540-like [Fragaria vesca subsp. vesca]	Serine/threonine-protein kinase At5g01020 OS=Arabidopsis thaliana GN=At5g01020 PE=1 SV=1	ATP-binding cassette, subfamily B (MDR/TAP), member 1	5.1777	13.1049	Up
	CL10827.Contig3	hypothetical protein VITISV_023156 [Vitis vinifera]	Serine/threonine-protein kinase At5g01020 OS=Arabidopsis thaliana GN=At5g01020 PE=1 SV=1	ATP-binding cassette, subfamily B (MDR/TAP), member 1	0.0606	0.1241	Up
	CL1604.Contig4	hypothetical protein PRUPE_ppa019028mg, partial [Prunus persica]	Serine/threonine-protein kinase At5g01020 OS=Arabidopsis thaliana GN=At5g01020 PE=1 SV=1	ATP-binding cassette, subfamily B (MDR/TAP), member 1	5.9334	11.3814	Up
	Unigene33143	PREDICTED: serine/threonine-protein kinase At5g01020-like [Vitis vinifera]	Serine/threonine-protein kinase At5g01020 OS=Arabidopsis thaliana GN=At5g01020 PE=1 SV=1	ATP-binding cassette, subfamily B (MDR/TAP), member 1	0.5211	0.8884	Up
	CL9700.Contig2	hypothetical protein PRUPE_ppa001427mg [Prunus persica]	Receptor like protein kinase S.2 OS=Arabidopsis thaliana GN=LECRKS2 PE=2 SV=2	ATP-binding cassette, subfamily B (MDR/TAP), member 1	34.8817	59.1999	Up
	CL2193.Contig2	unnamed protein product [Vitis vinifera]	Probable receptor-like protein kinase At5g15080 OS=Arabidopsis thaliana GN=At5g15080 PE=1 SV=1	ATP-binding cassette, subfamily B (MDR/TAP), member 1	24.0455	39.6366	Up
	CL1604.Contig3	kinase-like protein [Glycine max] >gi|223452333|gb|ACM89494.1| kinase-like protein [Glycine max]	Serine/threonine-protein kinase At5g01020 OS=Arabidopsis thaliana GN=At5g01020 PE=1 SV=1	ATP-binding cassette, subfamily B (MDR/TAP), member 1	23.7276	37.3038	Up
	CL1604.Contig2	Avr9/Cf-9 induced kinase 1 [Nicotiana tabacum]	Serine/threonine-protein kinase At5g01020 OS=Arabidopsis thaliana GN=At5g01020 PE=1 SV=1	ATP-binding cassette, subfamily B (MDR/TAP), member 1	2.6159	3.9279	Up
	Unigene35061	hypothetical protein PRUPE_ppa015760mg [Prunus persica]	L-type lectin-domain containing receptor kinase IX.1 OS=Arabidopsis thaliana GN=LECRK91 PE=2 SV=1	ATP-binding cassette, subfamily B (MDR/TAP), member 1	1.4452	2.0699	Up
	CL3657.Contig2	PREDICTED: serine/threonine-protein kinase At5g01020-like [Vitis vinifera]	Serine/threonine-protein kinase At5g01020 OS=Arabidopsis thaliana GN=At5g01020 PE=1 SV=1	ATP-binding cassette, subfamily B (MDR/TAP), member 1	0.2923	0.3738	Up
	Unigene6048	PREDICTED: probable LRR receptor-like serine/threonine-protein kinase MRH1-like [Solanum lycopersicum]	Probable inactive receptor-like protein kinase At3g56050 OS=Arabidopsis thaliana GN=At3g56050 PE=2 SV=1	ATP-binding cassette, subfamily B (MDR/TAP), member 1	14.8002	16.4578	Up
	Unigene2355	PREDICTED: serine/threonine-protein kinase At5g01020-like [Vitis vinifera]	Serine/threonine-protein kinase At5g01020 OS=Arabidopsis thaliana GN=At5g01020 PE=1 SV=1	ATP-binding cassette, subfamily B (MDR/TAP), member 1	0.8223	0.8736	Up
	CL8261.Contig1	hypothetical protein PRUPE_ppa007026mg [Prunus persica]	Probable receptor-like protein kinase At5g56460 OS=Arabidopsis thaliana GN=At5g56460 PE=1 SV=1	ATP-binding cassette, subfamily B (MDR/TAP), member 1	2.2168	2.3151	Up
	CL3538.Contig2	PREDICTED: ABC transporter I family member 1-like [Fragaria vesca subsp. vesca]	ABC transporter I family member 1 OS=Arabidopsis thaliana GN=ABCI1 PE=2 SV=1	ATP-binding cassette, subfamily B (MDR/TAP), member 1	1.5382	1.5737	Up
	CL10827.Contig4	hypothetical protein VITISV_023156 [Vitis vinifera]	Serine/threonine-protein kinase At5g01020 OS=Arabidopsis thaliana GN=At5g01020 PE=1 SV=1	ATP-binding cassette, subfamily B (MDR/TAP), member 1	0.0592	0.0605	Up
	CL10997.Contig2	unnamed protein product [Vitis vinifera]	Probable receptor-like protein kinase At5g15080 OS=Arabidopsis thaliana GN=At5g15080 PE=1 SV=1	ATP-binding cassette, subfamily B (MDR/TAP), member 1	24.3199	24.136	Down
	CL10997.Contig3	unnamed protein product [Vitis vinifera]	Probable receptor-like protein kinase At5g15080 OS=Arabidopsis thaliana GN=At5g15080 PE=1 SV=1	ATP-binding cassette, subfamily B (MDR/TAP), member 1	25.9911	24.8023	Down
	Unigene10925	PREDICTED: receptor-like serine/threonine-protein kinase NCRK-like [Vitis vinifera]	Receptor-like serine/threonine-protein kinase NCRK OS=Arabidopsis thaliana GN=NCRK PE=1 SV=1	ATP-binding cassette, subfamily B (MDR/TAP), member 1	13.7949	12.9366	Down
	CL2193.Contig1	unnamed protein product [Vitis vinifera]	Probable receptor-like protein kinase At5g15080 OS=Arabidopsis thaliana GN=At5g15080 PE=1 SV=1	ATP-binding cassette, subfamily B (MDR/TAP), member 1	13.9514	13.0495	Down
	CL2307.Contig2	PREDICTED: probable receptor-like protein kinase At5g15080-like [Solanum lycopersicum]	Probable receptor-like protein kinase At5g15080 OS=Arabidopsis thaliana GN=At5g15080 PE=1 SV=1	ATP-binding cassette, subfamily B (MDR/TAP), member 1	2.6275	2.3894	Down
	CL9202.Contig2	serine/threonine-protein kinase cx32, putative [Ricinus communis] >gi|223551382|gb|EEF52868.1| serine/threonine-protein kinase cx32, putative [Ricinus communis]	Serine/threonine-protein kinase At5g01020 OS=Arabidopsis thaliana GN=At5g01020 PE=1 SV=1	ATP-binding cassette, subfamily B (MDR/TAP), member 1	17.6624	15.7763	Down
	Unigene34282	--	--	ATP-binding cassette, subfamily B (MDR/TAP), member 1	3.5129	3.0409	Down
	CL6663.Contig1	unnamed protein product [Vitis vinifera]	Probable receptor-like protein kinase At5g15080 OS=Arabidopsis thaliana GN=At5g15080 PE=1 SV=1	ATP-binding cassette, subfamily B (MDR/TAP), member 1	8.2322	7.0808	Down
	CL8261.Contig2	hypothetical protein PRUPE_ppa007026mg [Prunus persica]	Probable receptor-like protein kinase At5g56460 OS=Arabidopsis thaliana GN=At5g56460 PE=1 SV=1	ATP-binding cassette, subfamily B (MDR/TAP), member 1	8.2451	6.9511	Down
	Unigene19474	PREDICTED: probable receptor-like protein kinase At5g15080-like [Vitis vinifera] >gi|296086431|emb|CBI32020.3| unnamed protein product [Vitis vinifera]	Probable receptor-like protein kinase At5g15080 OS=Arabidopsis thaliana GN=At5g15080 PE=1 SV=1	ATP-binding cassette, subfamily B (MDR/TAP), member 1	12.5831	10.3796	Down
	CL4591.Contig1	PREDICTED: probable receptor-like protein kinase At5g15080-like [Solanum lycopersicum]	Probable receptor-like protein kinase At5g15080 OS=Arabidopsis thaliana GN=At5g15080 PE=1 SV=1	ATP-binding cassette, subfamily B (MDR/TAP), member 1	19.356	15.9144	Down
	CL1981.Contig5	hypothetical protein VITISV_038877 [Vitis vinifera]	Probable LRR receptor-like serine/threonine-protein kinase At4g37250 OS=Arabidopsis thaliana GN=At4g37250 PE=2 SV=1	ATP-binding cassette, subfamily B (MDR/TAP), member 1	10.3746	8.4909	Down
	Unigene13312	hypothetical protein PRUPE_ppa023937mg [Prunus persica]	Probable receptor-like protein kinase At5g15080 OS=Arabidopsis thaliana GN=At5g15080 PE=1 SV=1	ATP-binding cassette, subfamily B (MDR/TAP), member 1	12.172	9.803	Down
	Unigene20325	PREDICTED: serine/threonine-protein kinase At5g01020-like [Vitis vinifera]	Serine/threonine-protein kinase At5g01020 OS=Arabidopsis thaliana GN=At5g01020 PE=1 SV=1	ATP-binding cassette, subfamily B (MDR/TAP), member 1	1.0536	0.8469	Down
	Unigene16509	PREDICTED: probable leucine-rich repeat receptor-like serine/threonine-protein kinase At5g15730-like [Glycine max]	Probable leucine-rich repeat receptor-like serine/threonine-protein kinase At5g15730 OS=Arabidopsis thaliana GN=At5g15730 PE=2 SV=1	ATP-binding cassette, subfamily B (MDR/TAP), member 1	24.8695	19.6361	Down
	Unigene11323	PREDICTED: probable receptor-like protein kinase At5g47070-like [Vitis vinifera]	Probable receptor-like protein kinase At5g47070 OS=Arabidopsis thaliana GN=At5g47070 PE=1 SV=1	ATP-binding cassette, subfamily B (MDR/TAP), member 1	4.6576	3.6364	Down
	CL6663.Contig2	unnamed protein product [Vitis vinifera]	Probable receptor-like protein kinase At5g15080 OS=Arabidopsis thaliana GN=At5g15080 PE=1 SV=1	ATP-binding cassette, subfamily B (MDR/TAP), member 1	6.981	5.3961	Down
	Unigene9368	PREDICTED: uncharacterized protein LOC101302546 [Fragaria vesca subsp. vesca]	Chromatin assembly factor 1 subunit FAS1 OS=Arabidopsis thaliana GN=FAS1 PE=1 SV=1	ATP-binding cassette, subfamily B (MDR/TAP), member 1	106.125	80.9299	Down
	CL4591.Contig2	PREDICTED: probable receptor-like protein kinase At5g15080-like [Solanum lycopersicum]	Probable receptor-like protein kinase At5g15080 OS=Arabidopsis thaliana GN=At5g15080 PE=1 SV=1	ATP-binding cassette, subfamily B (MDR/TAP), member 1	14.6793	10.9669	Down
	CL1463.Contig3	PREDICTED: uncharacterized protein LOC100852866 [Vitis vinifera]	Glycine-rich cell wall structural protein 1.0 OS=Phaseolus vulgaris PE=2 SV=1	ATP-binding cassette, subfamily B (MDR/TAP), member 1	0.5616	0.4178	Down
	Unigene29354	predicted protein [Populus trichocarpa] >gi|222843593|gb|EEE81140.1| predicted protein [Populus trichocarpa]	Probable methyltransferase PMT28 OS=Arabidopsis thaliana GN=At1g19430 PE=1 SV=1	ATP-binding cassette, subfamily B (MDR/TAP), member 9	1.3919	0.9906	Down
	Unigene7137	PREDICTED: probable receptor-like protein kinase At5g15080-like [Vitis vinifera]	Probable receptor-like protein kinase At5g15080 OS=Arabidopsis thaliana GN=At5g15080 PE=1 SV=1	ATP-binding cassette, subfamily B (MDR/TAP), member 1	26.0822	18.3639	Down
	CL10827.Contig1	Protein kinase APK1B, chloroplast precursor, putative [Ricinus communis] >gi|223540742|gb|EEF42302.1| Protein kinase APK1B, chloroplast precursor, putative [Ricinus communis]	Serine/threonine-protein kinase At5g01020 OS=Arabidopsis thaliana GN=At5g01020 PE=1 SV=1	ATP-binding cassette, subfamily B (MDR/TAP), member 1	2.3498	1.5329	Down
	CL3538.Contig1	PREDICTED: ABC transporter I family member 1-like [Fragaria vesca subsp. vesca]	ABC transporter I family member 1 OS=Arabidopsis thaliana GN=ABCI1 PE=2 SV=1	ATP-binding cassette, subfamily B (MDR/TAP), member 1	1.7054	1.0468	Down
	CL2862.Contig1	PREDICTED: ABC transporter I family member 17-like [Solanum lycopersicum]	ABC transporter I family member 17 OS=Arabidopsis thaliana GN=ABCI17 PE=2 SV=1	ATP-binding cassette, subfamily B (MDR/TAP), member 1	60.1468	34.9025	Down
	Unigene6173	PREDICTED: receptor-like serine/threonine-protein kinase At3g01300-like isoform 2 [Vitis vinifera]	Probable receptor-like protein kinase At5g56460 OS=Arabidopsis thaliana GN=At5g56460 PE=1 SV=1	ATP-binding cassette, subfamily B (MDR/TAP), member 1	11.5325	6.3443	Down
	CL10827.Contig2	predicted protein [Populus trichocarpa] >gi|222833615|gb|EEE72092.1| predicted protein [Populus trichocarpa]	Serine/threonine-protein kinase At5g01020 OS=Arabidopsis thaliana GN=At5g01020 PE=1 SV=1	ATP-binding cassette, subfamily B (MDR/TAP), member 1	2.3833	1.3075	Down
	Unigene29366	hypothetical protein PRUPE_ppa006146mg [Prunus persica]	Probable methyltransferase PMT28 OS=Arabidopsis thaliana GN=At1g19430 PE=1 SV=1	ATP-binding cassette, subfamily B (MDR/TAP), member 9	1.8522	1.0106	Down
	CL2307.Contig1	hypothetical protein PRUPE_ppa006069mg [Prunus persica]	Probable receptor-like protein kinase At5g15080 OS=Arabidopsis thaliana GN=At5g15080 PE=1 SV=1	ATP-binding cassette, subfamily B (MDR/TAP), member 1	13.388	7.2297	Down
	CL2862.Contig2	phosphate abc transporter, putative [Ricinus communis] >gi|223538642|gb|EEF40243.1| phosphate abc transporter, putative [Ricinus communis]	ABC transporter I family member 17 OS=Arabidopsis thaliana GN=ABCI17 PE=2 SV=1	ATP-binding cassette, subfamily B (MDR/TAP), member 1	10.1967	4.9328	Down
	CL2068.Contig3	PREDICTED: serine/threonine-protein kinase At5g01020-like [Vitis vinifera] >gi|296085496|emb|CBI29228.3| unnamed protein product [Vitis vinifera]	Serine/threonine-protein kinase At5g01020 OS=Arabidopsis thaliana GN=At5g01020 PE=1 SV=1	ATP-binding cassette, subfamily B (MDR/TAP), member 1	11.9387	5.7477	Down
	CL2307.Contig3	PREDICTED: probable receptor-like protein kinase At5g15080-like [Glycine max]	Receptor-like serine/threonine-protein kinase At3g01300 OS=Arabidopsis thaliana GN=At3g01300 PE=2 SV=1	ATP-binding cassette, subfamily B (MDR/TAP), member 1	13.4323	6.2564	Down
	Unigene22023	PREDICTED: serine/threonine-protein kinase At5g01020-like [Vitis vinifera]	Serine/threonine-protein kinase At5g01020 OS=Arabidopsis thaliana GN=At5g01020 PE=1 SV=1	ATP-binding cassette, subfamily B (MDR/TAP), member 1	1.2004	0.5263	Down
	CL6249.Contig1	PREDICTED: proline-rich receptor-like protein kinase PERK2-like [Solanum lycopersicum]	L-type lectin-domain containing receptor kinase IX.2 OS=Arabidopsis thaliana GN=LECRK92 PE=2 SV=1	ATP-binding cassette, subfamily B (MDR/TAP), member 1	3.9556	1.644	Down
	CL2068.Contig1	PREDICTED: serine/threonine-protein kinase At5g01020-like [Vitis vinifera] >gi|296085496|emb|CBI29228.3| unnamed protein product [Vitis vinifera]	Serine/threonine-protein kinase At5g01020 OS=Arabidopsis thaliana GN=At5g01020 PE=1 SV=1	ATP-binding cassette, subfamily B (MDR/TAP), member 1	7.3749	2.8503	Down
	CL2068.Contig2	PREDICTED: serine/threonine-protein kinase At5g01020-like [Vitis vinifera] >gi|296085496|emb|CBI29228.3| unnamed protein product [Vitis vinifera]	Serine/threonine-protein kinase At5g01020 OS=Arabidopsis thaliana GN=At5g01020 PE=1 SV=1	ATP-binding cassette, subfamily B (MDR/TAP), member 1	8.1216	3.0027	Down
	CL1463.Contig2	PREDICTED: uncharacterized protein LOC100852866 [Vitis vinifera]	Glycine-rich cell wall structural protein 1.0 OS=Phaseolus vulgaris PE=2 SV=1	ATP-binding cassette, subfamily B (MDR/TAP), member 1	0.642	0.1642	Down
	Unigene23836	PREDICTED: serine/threonine-protein kinase At5g01020 [Vitis vinifera]	Serine/threonine-protein kinase At5g01020 OS=Arabidopsis thaliana GN=At5g01020 PE=1 SV=1	ATP-binding cassette, subfamily B (MDR/TAP), member 1	3.3294	0.8515	Down
	Unigene29360	hypothetical protein PRUPE_ppa006146mg [Prunus persica]	Probable methyltransferase PMT28 OS=Arabidopsis thaliana GN=At1g19430 PE=1 SV=1	ATP-binding cassette, subfamily B (MDR/TAP), member 9	2.2506	0.4264	Down
	CL4926.Contig4	PREDICTED: putative ABC transporter B family member 8-like [Vitis vinifera]	ABC transporter B family member 18 OS=Arabidopsis thaliana GN=ABCB18 PE=3 SV=1	ATP-binding cassette, subfamily B (MDR/TAP), member 1	0	0	Down
	CL4926.Contig3	PREDICTED: putative ABC transporter B family member 8-like [Vitis vinifera]	ABC transporter B family member 18 OS=Arabidopsis thaliana GN=ABCB18 PE=3 SV=1	ATP-binding cassette, subfamily B (MDR/TAP), member 1	0.1135	1.1609	Down
	CL4926.Contig1	PREDICTED: putative ABC transporter B family member 8-like [Vitis vinifera]	ABC transporter B family member 15 OS=Arabidopsis thaliana GN=ABCB15 PE=1 SV=1	ATP-binding cassette, subfamily B (MDR/TAP), member 1	0.2485	1.6385	Down
	Unigene13858	PREDICTED: putative ABC transporter B family member 8-like [Vitis vinifera]	ABC transporter B family member 19 OS=Arabidopsis thaliana GN=ABCB19 PE=1 SV=1	ATP-binding cassette, subfamily B (MDR/TAP), member 1	5.9237	30.5339	Down
	CL4926.Contig2	PREDICTED: putative ABC transporter B family member 8-like [Vitis vinifera]	ABC transporter B family member 15 OS=Arabidopsis thaliana GN=ABCB15 PE=1 SV=1	ATP-binding cassette, subfamily B (MDR/TAP), member 1	1.9885	9.4257	Down
	CL7149.Contig2	unnamed protein product [Vitis vinifera]	ABC transporter B family member 11 OS=Arabidopsis thaliana GN=ABCB11 PE=2 SV=1	ATP-binding cassette, subfamily B (MDR/TAP), member 1	1.2722	5.0326	Down
	Unigene31585	PREDICTED: ABC transporter B family member 13-like [Vitis vinifera]	ABC transporter B family member 13 OS=Arabidopsis thaliana GN=ABCB13 PE=3 SV=1	ATP-binding cassette, subfamily B (MDR/TAP), member 1	0.8126	2.7016	Down
	Unigene34792	PREDICTED: putative multidrug resistance protein-like [Vitis vinifera]	ABC transporter B family member 16 OS=Arabidopsis thaliana GN=ABCB16 PE=2 SV=1	ATP-binding cassette, subfamily B (MDR/TAP), member 1	1.5917	4.071	Down
	Unigene34234	hypothetical protein PRUPE_ppa023953mg [Prunus persica]	ABC transporter B family member 5 OS=Arabidopsis thaliana GN=ABCB5 PE=3 SV=1	ATP-binding cassette, subfamily B (MDR/TAP), member 1	1.3422	3.3347	Down
	CL7149.Contig1	unnamed protein product [Vitis vinifera]	ABC transporter B family member 11 OS=Arabidopsis thaliana GN=ABCB11 PE=2 SV=1	ATP-binding cassette, subfamily B (MDR/TAP), member 1	0.0859	0.1758	Down
	CL1745.Contig6	hypothetical protein PRUPE_ppa002147mg [Prunus persica]	ABC transporter B family member 28 OS=Arabidopsis thaliana GN=ABCB28 PE=2 SV=1	ATP-binding cassette, subfamily B (MDR/TAP), member 1	0.728	1.4896	Down
	CL6830.Contig1	PREDICTED: ABC transporter B family member 15-like [Solanum lycopersicum]	ABC transporter B family member 15 OS=Arabidopsis thaliana GN=ABCB15 PE=1 SV=1	ATP-binding cassette, subfamily B (MDR/TAP), member 1	20.2818	37.6156	Down
	Unigene30683	unnamed protein product [Vitis vinifera]	ABC transporter B family member 11 OS=Arabidopsis thaliana GN=ABCB11 PE=2 SV=1	ATP-binding cassette, subfamily B (MDR/TAP), member 1	0.8758	1.4934	Down
	CL10016.Contig1	PREDICTED: ABC transporter B family member 20-like [Vitis vinifera]	ABC transporter B family member 6 OS=Arabidopsis thaliana GN=ABCB6 PE=1 SV=2	ATP-binding cassette, subfamily B (MDR/TAP), member 1	0.8221	1.3083	Down
	CL6643.Contig1	PREDICTED: ABC transporter B family member 26, chloroplastic-like [Fragaria vesca subsp. vesca]	ABC transporter B family member 26, chloroplastic OS=Arabidopsis thaliana GN=ABCB26 PE=1 SV=1	ATP-binding cassette, subfamily B (MDR/TAP), member 9	0.332	0.5095	Down
	CL845.Contig2	PREDICTED: ABC transporter B family member 11 [Vitis vinifera]	ABC transporter B family member 21 OS=Arabidopsis thaliana GN=ABCB21 PE=1 SV=2	ATP-binding cassette, subfamily B (MDR/TAP), member 1	18.1113	27.076	Down
	Unigene35134	PREDICTED: ABC transporter B family member 13-like [Vitis vinifera]	ABC transporter B family member 13 OS=Arabidopsis thaliana GN=ABCB13 PE=3 SV=1	ATP-binding cassette, subfamily B (MDR/TAP), member 1	1.4576	2.1303	Down
	CL845.Contig1	PREDICTED: ABC transporter B family member 11 [Vitis vinifera]	ABC transporter B family member 21 OS=Arabidopsis thaliana GN=ABCB21 PE=1 SV=2	ATP-binding cassette, subfamily B (MDR/TAP), member 1	2.8018	4.0791	Down
	Unigene32678	PREDICTED: ABC transporter B family member 20-like [Solanum lycopersicum]	ABC transporter B family member 6 OS=Arabidopsis thaliana GN=ABCB6 PE=1 SV=2	ATP-binding cassette, subfamily B (MDR/TAP), member 1	2.7887	4.0417	Down
	CL10474.Contig2	PREDICTED: ABC transporter B family member 25-like [Vitis vinifera] >gi|297734078|emb|CBI15325.3| unnamed protein product [Vitis vinifera]	ABC transporter B family member 25 OS=Oryza sativa subsp. japonica GN=OsABCB25 PE=2 SV=1	ATP-binding cassette, subfamily B (MDR/TAP), member 10	2.2231	3.1895	Down
	CL9923.Contig1	multidrug resistance protein 1, 2, putative [Ricinus communis] >gi|223546667|gb|EEF48165.1| multidrug resistance protein 1, 2, putative [Ricinus communis]	ABC transporter B family member 15 OS=Arabidopsis thaliana GN=ABCB15 PE=1 SV=1	ATP-binding cassette, subfamily B (MDR/TAP), member 1	0.826	1.1268	Down
	CL10016.Contig2	PREDICTED: ABC transporter B family member 20-like [Vitis vinifera]	ABC transporter B family member 6 OS=Arabidopsis thaliana GN=ABCB6 PE=1 SV=2	ATP-binding cassette, subfamily B (MDR/TAP), member 1	0.2758	0.3762	Down
	Unigene34191	ATTAP1 [Arabidopsis lyrata subsp. lyrata] >gi|297333157|gb|EFH63575.1| ATTAP1 [Arabidopsis lyrata subsp. lyrata]	ABC transporter B family member 26, chloroplastic OS=Arabidopsis thaliana GN=ABCB26 PE=1 SV=1	ATP-binding cassette, subfamily B (MDR/TAP), member 9	2.787	3.7285	Down
	CL10649.Contig1	PREDICTED: ABC transporter B family member 20-like [Fragaria vesca subsp. vesca]	ABC transporter B family member 20 OS=Arabidopsis thaliana GN=ABCB20 PE=2 SV=1	ATP-binding cassette, subfamily B (MDR/TAP), member 1	10.409	13.9223	Down
	CL6643.Contig3	--	ABC transporter B family member 26, chloroplastic OS=Arabidopsis thaliana GN=ABCB26 PE=1 SV=1	ATP-binding cassette, subfamily B (MDR/TAP), member 9	0.7487	0.9191	Down
	Unigene5261	PREDICTED: ABC transporter B family member 20-like [Cucumis sativus]	ABC transporter B family member 6 OS=Arabidopsis thaliana GN=ABCB6 PE=1 SV=2	ATP-binding cassette, subfamily B (MDR/TAP), member 1	5.0814	5.8916	Down
	Unigene30711	PREDICTED: ABC transporter B family member 20-like [Vitis vinifera]	ABC transporter B family member 6 OS=Arabidopsis thaliana GN=ABCB6 PE=1 SV=2	ATP-binding cassette, subfamily B (MDR/TAP), member 1	2.2854	2.5842	Down
	Unigene13325	unnamed protein product [Vitis vinifera]	ABC transporter B family member 20 OS=Arabidopsis thaliana GN=ABCB20 PE=2 SV=1	ATP-binding cassette, subfamily B (MDR/TAP), member 1	5.3179	5.9844	Down
	CL1745.Contig2	hypothetical protein PRUPE_ppa002147mg [Prunus persica]	ABC transporter B family member 28 OS=Arabidopsis thaliana GN=ABCB28 PE=2 SV=1	ATP-binding cassette, subfamily B (MDR/TAP), member 1	1.2682	1.421	Down
	CL10016.Contig3	PREDICTED: ABC transporter B family member 20-like [Vitis vinifera]	ABC transporter B family member 6 OS=Arabidopsis thaliana GN=ABCB6 PE=1 SV=2	ATP-binding cassette, subfamily B (MDR/TAP), member 1	1.3022	1.4347	Down
	CL9923.Contig2	multidrug resistance protein 1, 2, putative [Ricinus communis] >gi|223546667|gb|EEF48165.1| multidrug resistance protein 1, 2, putative [Ricinus communis]	ABC transporter B family member 15 OS=Arabidopsis thaliana GN=ABCB15 PE=1 SV=1	ATP-binding cassette, subfamily B (MDR/TAP), member 1	4.1093	4.349	Down
	Unigene30662	PREDICTED: ABC transporter B family member 20-like [Glycine max]	ABC transporter B family member 6 OS=Arabidopsis thaliana GN=ABCB6 PE=1 SV=2	ATP-binding cassette, subfamily B (MDR/TAP), member 1	4.8695	5.1534	Down
	CL1745.Contig3	ABC transporter B family member [Medicago truncatula] >gi|355502573|gb|AES83776.1| ABC transporter B family member [Medicago truncatula]	ABC transporter B family member 28 OS=Arabidopsis thaliana GN=ABCB28 PE=2 SV=1	ATP-binding cassette, subfamily B (MDR/TAP), member 1	3.9657	4.1078	Down
	CL4409.Contig1	multidrug/pheromone exporter, MDR family, ABC transporter family [Populus trichocarpa] >gi|222865349|gb|EEF02480.1| multidrug/pheromone exporter, MDR family, ABC transporter family [Populus trichocarpa]	ABC transporter B family member 20 OS=Arabidopsis thaliana GN=ABCB20 PE=2 SV=1	ATP-binding cassette, subfamily B (MDR/TAP), member 1	0.5303	0.5425	Down
	Unigene22575	hypothetical protein PRUPE_ppa002147mg [Prunus persica]	ABC transporter B family member 28 OS=Arabidopsis thaliana GN=ABCB28 PE=2 SV=1	regulatory associated protein of mTOR	7.1554	7.2878	Down
	CL3548.Contig2	PREDICTED: ABC transporter B family member 20-like [Vitis vinifera]	ABC transporter B family member 6 OS=Arabidopsis thaliana GN=ABCB6 PE=1 SV=2	ATP-binding cassette, subfamily B (MDR/TAP), member 1	9.602	9.5865	Down
	CL6830.Contig3	hypothetical protein PRUPE_ppa000356mg [Prunus persica]	ABC transporter B family member 15 OS=Arabidopsis thaliana GN=ABCB15 PE=1 SV=1	ATP-binding cassette, subfamily B (MDR/TAP), member 1	3.4037	3.362	Down
	CL3548.Contig3	PREDICTED: ABC transporter B family member 20-like [Vitis vinifera]	ABC transporter B family member 6 OS=Arabidopsis thaliana GN=ABCB6 PE=1 SV=2	ATP-binding cassette, subfamily B (MDR/TAP), member 1	8.1571	7.9248	Down
	Unigene17084	PREDICTED: ABC transporter B family member 20-like [Glycine max]	ABC transporter B family member 20 OS=Arabidopsis thaliana GN=ABCB20 PE=2 SV=1	ATP-binding cassette, subfamily B (MDR/TAP), member 1	8.1916	7.8647	Down
	Unigene12250	PREDICTED: ABC transporter B family member 20-like [Vitis vinifera]	ABC transporter B family member 20 OS=Arabidopsis thaliana GN=ABCB20 PE=2 SV=1	ATP-binding cassette, subfamily B (MDR/TAP), member 1	5.6145	5.3692	Down
	Unigene33724	nucleosome assembly protein 1-like protein 4 [Nicotiana tabacum]	ABC transporter B family member 28 OS=Arabidopsis thaliana GN=ABCB28 PE=2 SV=1	nucleosome assembly protein 1-like 1	0.6602	0.6272	Down
	CL1745.Contig5	hypothetical protein PRUPE_ppa002147mg [Prunus persica]	ABC transporter B family member 28 OS=Arabidopsis thaliana GN=ABCB28 PE=2 SV=1	ATP-binding cassette, subfamily B (MDR/TAP), member 1	0.5619	0.5173	Down
	Unigene14326	hypothetical protein PRUPE_ppa002192mg [Prunus persica]	ABC transporter B family member 26, chloroplastic OS=Arabidopsis thaliana GN=ABCB26 PE=1 SV=1	ATP-binding cassette, subfamily B (MDR/TAP), member 9	6.3495	5.6838	Down
	Unigene4773	MDR-like ABC transporter [Catharanthus roseus]	ABC transporter B family member 9 OS=Arabidopsis thaliana GN=ABCB9 PE=3 SV=2	ATP-binding cassette, subfamily B (MDR/TAP), member 1	3.6982	3.2952	Down
	CL4409.Contig2	multidrug/pheromone exporter, MDR family, ABC transporter family [Populus trichocarpa] >gi|222865349|gb|EEF02480.1| multidrug/pheromone exporter, MDR family, ABC transporter family [Populus trichocarpa]	ABC transporter B family member 20 OS=Arabidopsis thaliana GN=ABCB20 PE=2 SV=1	ATP-binding cassette, subfamily B (MDR/TAP), member 1	1.2986	1.1552	Down
	CL845.Contig4	P-glycoprotein 11 [Arabidopsis thaliana] >gi|75334433|sp|Q9FWX7.1|AB11B_ARATH RecName: Full=ABC transporter B family member 11; Short=ABC transporter ABCB.11; Short=AtABCB11; AltName: Full=Multidrug resistance protein 8; AltName: Full=P-glycoprotein 11 >gi|332189319|gb|AEE27440.1| P-glycoprotein 11 [Arabidopsis thaliana]	ABC transporter B family member 11 OS=Arabidopsis thaliana GN=ABCB11 PE=2 SV=1	ATP-binding cassette, subfamily B (MDR/TAP), member 1	3.431	3.042	Down
	CL8752.Contig2	hypothetical protein PRUPE_ppa000359mg [Prunus persica]	ABC transporter B family member 19 OS=Arabidopsis thaliana GN=ABCB19 PE=1 SV=1	ATP-binding cassette, subfamily B (MDR/TAP), member 1	1.5381	1.359	Down
	CL4534.Contig1	PREDICTED: ABC transporter B family member 25, mitochondrial-like [Vitis vinifera] >gi|297745734|emb|CBI15790.3| unnamed protein product [Vitis vinifera]	ABC transporter B family member 25, mitochondrial OS=Arabidopsis thaliana GN=ABCB25 PE=1 SV=1	mitochondrial ABC transporter ATM	5.7462	5.0531	Down
	Unigene8552	unnamed protein product [Vitis vinifera]	ABC transporter B family member 29, chloroplastic OS=Arabidopsis thaliana GN=ABCB29 PE=1 SV=1	putative ABC transport system ATP-binding protein	5.4775	4.7769	Down
	CL10649.Contig2	PREDICTED: ABC transporter B family member 20-like, partial [Cucumis sativus]	ABC transporter B family member 20 OS=Arabidopsis thaliana GN=ABCB20 PE=2 SV=1	ATP-binding cassette, subfamily B (MDR/TAP), member 1	11.2597	9.8152	Down
	Unigene12118	unnamed protein product [Vitis vinifera]	ABC transporter B family member 9 OS=Arabidopsis thaliana GN=ABCB9 PE=3 SV=2	ATP-binding cassette, subfamily B (MDR/TAP), member 1	5.7522	5.0021	Down
	CL8904.Contig2	unnamed protein product [Vitis vinifera]	ABC transporter B family member 26, chloroplastic OS=Arabidopsis thaliana GN=ABCB26 PE=1 SV=1	ATP-binding cassette, subfamily B (MDR/TAP), member 9	8.0679	7.0088	Down
	Unigene11300	unnamed protein product [Vitis vinifera]	ABC transporter B family member 29, chloroplastic OS=Arabidopsis thaliana GN=ABCB29 PE=1 SV=1	putative ABC transport system ATP-binding protein	5.732	4.9696	Down
	Unigene21227	PREDICTED: ABC transporter B family member 11-like [Solanum lycopersicum]	ABC transporter B family member 21 OS=Arabidopsis thaliana GN=ABCB21 PE=1 SV=2	ATP-binding cassette, subfamily B (MDR/TAP), member 1	3.8201	3.2568	Down
	Unigene4731	PREDICTED: ABC transporter B family member 13-like [Vitis vinifera]	ABC transporter B family member 14 OS=Arabidopsis thaliana GN=ABCB14 PE=3 SV=1	ATP-binding cassette, subfamily B (MDR/TAP), member 1	4.2771	3.5248	Down
	CL10474.Contig1	PREDICTED: ABC transporter B family member 25-like [Vitis vinifera] >gi|297734078|emb|CBI15325.3| unnamed protein product [Vitis vinifera]	ABC transporter B family member 25 OS=Oryza sativa subsp. japonica GN=OsABCB25 PE=2 SV=1	ATP-binding cassette, subfamily B (MDR/TAP), member 10	2.1983	1.7938	Down
	Unigene2538	PREDICTED: ABC transporter B family member 9-like, partial [Solanum lycopersicum]	ABC transporter B family member 9 OS=Arabidopsis thaliana GN=ABCB9 PE=3 SV=2	ATP-binding cassette, subfamily B (MDR/TAP), member 1	5.8447	4.6407	Down
	CL2158.Contig1	hypothetical protein PRUPE_ppa002147mg [Prunus persica]	ABC transporter B family member 28 OS=Arabidopsis thaliana GN=ABCB28 PE=2 SV=1	--	4.7821	3.7473	Down
	Unigene20569	P-glycoprotein 20 [Arabidopsis lyrata subsp. lyrata] >gi|297323867|gb|EFH54288.1| P-glycoprotein 20 [Arabidopsis lyrata subsp. lyrata]	ABC transporter B family member 20 OS=Arabidopsis thaliana GN=ABCB20 PE=2 SV=1	ATP-binding cassette, subfamily B (MDR/TAP), member 1	5.7409	4.4636	Down
	Unigene1397	PREDICTED: ABC transporter B family member 29, chloroplastic [Vitis vinifera]	ABC transporter B family member 29, chloroplastic OS=Arabidopsis thaliana GN=ABCB29 PE=1 SV=1	putative ABC transport system ATP-binding protein	11.8771	8.9301	Down
	CL845.Contig3	PREDICTED: ABC transporter B family member 21-like [Solanum lycopersicum]	ABC transporter B family member 11 OS=Arabidopsis thaliana GN=ABCB11 PE=2 SV=1	ATP-binding cassette, subfamily B (MDR/TAP), member 1	15.693	11.614	Down
	CL4689.Contig1	PREDICTED: ABC transporter B family member 1-like [Vitis vinifera]	ABC transporter B family member 1 OS=Arabidopsis thaliana GN=ABCB1 PE=1 SV=1	ATP-binding cassette, subfamily B (MDR/TAP), member 1	33.6702	24.401	Down
	Unigene29809	hypothetical protein PRUPE_ppa002147mg [Prunus persica]	ABC transporter B family member 28 OS=Arabidopsis thaliana GN=ABCB28 PE=2 SV=1	ATP-binding cassette, subfamily B (MDR/TAP), member 1	0.4275	0.3061	Down
	Unigene23715	MDR-like ABC transporter [Taxus cuspidata]	ABC transporter B family member 11 OS=Arabidopsis thaliana GN=ABCB11 PE=2 SV=1	ATP-binding cassette, subfamily B (MDR/TAP), member 1	3.7787	2.6577	Down
	Unigene20238	PREDICTED: ABC transporter B family member 19-like [Vitis vinifera]	ABC transporter B family member 10 OS=Arabidopsis thaliana GN=ABCB10 PE=1 SV=2	ATP-binding cassette, subfamily B (MDR/TAP), member 1	8.8875	6.2299	Down
	CL1745.Contig7	ABC transporter B family member [Medicago truncatula] >gi|355502573|gb|AES83776.1| ABC transporter B family member [Medicago truncatula]	ABC transporter B family member 28 OS=Arabidopsis thaliana GN=ABCB28 PE=2 SV=1	ATP-binding cassette, subfamily B (MDR/TAP), member 1	0.1451	0.099	Down
	Unigene29812	hypothetical protein PRUPE_ppa002147mg [Prunus persica]	ABC transporter B family member 28 OS=Arabidopsis thaliana GN=ABCB28 PE=2 SV=1	regulatory associated protein of mTOR	0.8315	0.5548	Down
	CL3548.Contig1	PREDICTED: ABC transporter B family member 20-like [Cucumis sativus]	ABC transporter B family member 20 OS=Arabidopsis thaliana GN=ABCB20 PE=2 SV=1	ATP-binding cassette, subfamily B (MDR/TAP), member 1	7.5558	5.0085	Down
	CL1745.Contig4	hypothetical protein PRUPE_ppa002147mg [Prunus persica]	ABC transporter B family member 28 OS=Arabidopsis thaliana GN=ABCB28 PE=2 SV=1	ATP-binding cassette, subfamily B (MDR/TAP), member 1	0.8779	0.5812	Down
	CL6830.Contig2	PREDICTED: ABC transporter B family member 15-like [Solanum lycopersicum]	ABC transporter B family member 15 OS=Arabidopsis thaliana GN=ABCB15 PE=1 SV=1	ATP-binding cassette, subfamily B (MDR/TAP), member 1	2.3835	1.5748	Down
	Unigene258	PREDICTED: ABC transporter B family member 28-like [Vitis vinifera] >gi|297741119|emb|CBI31850.3| unnamed protein product [Vitis vinifera]	ABC transporter B family member 28 OS=Arabidopsis thaliana GN=ABCB28 PE=2 SV=1	ATP-binding cassette, subfamily B (MDR/TAP), member 1	10.7497	6.5481	Down
	CL3243.Contig2	PREDICTED: vacuolar protein sorting-associated protein 53 homolog [Vitis vinifera] >gi|298204761|emb|CBI25259.3| unnamed protein product [Vitis vinifera]	ABC transporter B family member 11 OS=Arabidopsis thaliana GN=ABCB11 PE=2 SV=1	ATP-binding cassette, subfamily B (MDR/TAP), member 1	5.4622	3.2657	Down
	CL8752.Contig4	PREDICTED: ABC transporter B family member 19-like [Vitis vinifera]	ABC transporter B family member 19 OS=Arabidopsis thaliana GN=ABCB19 PE=1 SV=1	ATP-binding cassette, subfamily B (MDR/TAP), member 1	15.1338	8.4484	Down
	Unigene29808	hypothetical protein PRUPE_ppa002147mg [Prunus persica]	ABC transporter B family member 28 OS=Arabidopsis thaliana GN=ABCB28 PE=2 SV=1	ATP-binding cassette, subfamily B (MDR/TAP), member 1	0.4875	0.272	Down
	Unigene19869	multidrug/pheromone exporter, MDR family, ABC transporter family [Populus trichocarpa] >gi|222861712|gb|EEE99254.1| multidrug/pheromone exporter, MDR family, ABC transporter family [Populus trichocarpa]	ABC transporter B family member 4 OS=Arabidopsis thaliana GN=ABCB4 PE=1 SV=1	ATP-binding cassette, subfamily B (MDR/TAP), member 1	4.8587	2.644	Down
	Unigene19922	PREDICTED: ABC transporter B family member 9-like [Cucumis sativus]	ABC transporter B family member 9 OS=Arabidopsis thaliana GN=ABCB9 PE=3 SV=2	ATP-binding cassette, subfamily B (MDR/TAP), member 1	5.9992	3.1226	Down
	Unigene12960	PREDICTED: uncharacterized protein LOC100255153 [Vitis vinifera]	ABC transporter B family member 26, chloroplastic OS=Arabidopsis thaliana GN=ABCB26 PE=1 SV=1	ATP-binding cassette, subfamily B (MDR/TAP), member 9	3.4519	1.7957	Down
	CL4534.Contig2	Transporter ATM1, mitochondrial precursor, putative [Ricinus communis] >gi|223527304|gb|EEF29455.1| Transporter ATM1, mitochondrial precursor, putative [Ricinus communis]	ABC transporter B family member 25, mitochondrial OS=Arabidopsis thaliana GN=ABCB25 PE=1 SV=1	mitochondrial ABC transporter ATM	0.2199	0.1125	Down
	CL2158.Contig2	hypothetical protein PRUPE_ppa002147mg [Prunus persica]	ABC transporter B family member 28 OS=Arabidopsis thaliana GN=ABCB28 PE=2 SV=1	--	3.597	1.7842	Down
	Unigene3897	PREDICTED: ABC transporter B family member 26, chloroplastic [Vitis vinifera] >gi|296087608|emb|CBI34864.3| unnamed protein product [Vitis vinifera]	ABC transporter B family member 26, chloroplastic OS=Arabidopsis thaliana GN=ABCB26 PE=1 SV=1	ATP-binding cassette, subfamily B (MDR/TAP), member 9	1.5718	0.7742	Down
	Unigene17816	LO4 [Solanum pennellii]	ABC transporter B family member 19 OS=Arabidopsis thaliana GN=ABCB19 PE=1 SV=1	ATP-binding cassette, subfamily B (MDR/TAP), member 1	19.2889	9.3349	Down
	CL8752.Contig1	PREDICTED: ABC transporter B family member 19-like [Vitis vinifera]	ABC transporter B family member 19 OS=Arabidopsis thaliana GN=ABCB19 PE=1 SV=1	ATP-binding cassette, subfamily B (MDR/TAP), member 1	21.3176	9.4106	Down
	CL6643.Contig2	PREDICTED: ABC transporter B family member 26, chloroplastic-like [Fragaria vesca subsp. vesca]	ABC transporter B family member 26, chloroplastic OS=Arabidopsis thaliana GN=ABCB26 PE=1 SV=1	ATP-binding cassette, subfamily B (MDR/TAP), member 9	1.1686	0.5124	Down
	Unigene23771	PREDICTED: ABC transporter B family member 15-like [Vitis vinifera]	ABC transporter B family member 1 OS=Arabidopsis thaliana GN=ABCB1 PE=1 SV=1	ATP-binding cassette, subfamily B (MDR/TAP), member 1	3.8979	1.709	Down
	Unigene18093	multidrug resistance protein 1, 2, putative [Ricinus communis] >gi|223537924|gb|EEF39538.1| multidrug resistance protein 1, 2, putative [Ricinus communis]	ABC transporter B family member 15 OS=Arabidopsis thaliana GN=ABCB15 PE=1 SV=1	ATP-binding cassette, subfamily B (MDR/TAP), member 1	3.7205	1.6103	Down
	CL4689.Contig2	PREDICTED: ABC transporter B family member 1-like [Vitis vinifera]	ABC transporter B family member 1 OS=Arabidopsis thaliana GN=ABCB1 PE=1 SV=1	ATP-binding cassette, subfamily B (MDR/TAP), member 1	14.0742	6.0115	Down
	Unigene9773	PREDICTED: ABC transporter B family member 15-like [Vitis vinifera]	ABC transporter B family member 15 OS=Arabidopsis thaliana GN=ABCB15 PE=1 SV=1	ATP-binding cassette, subfamily B (MDR/TAP), member 1	5.2328	1.9217	Down
	Unigene8673	PREDICTED: ABC transporter B family member 26, chloroplastic [Vitis vinifera] >gi|296087608|emb|CBI34864.3| unnamed protein product [Vitis vinifera]	ABC transporter B family member 26, chloroplastic OS=Arabidopsis thaliana GN=ABCB26 PE=1 SV=1	ATP-binding cassette, subfamily B (MDR/TAP), member 9	2.513	0.9182	Down
	CL8904.Contig1	unnamed protein product [Vitis vinifera]	ABC transporter B family member 26, chloroplastic OS=Arabidopsis thaliana GN=ABCB26 PE=1 SV=1	ATP-binding cassette, subfamily B (MDR/TAP), member 9	1.1245	0.3835	Down
	Unigene24656	hypothetical protein PRUPE_ppa020218mg [Prunus persica]	ABC transporter B family member 15 OS=Arabidopsis thaliana GN=ABCB15 PE=1 SV=1	ATP-binding cassette, subfamily B (MDR/TAP), member 1	3.2477	1.1075	Down
	CL8752.Contig3	PREDICTED: ABC transporter B family member 19-like [Vitis vinifera]	ABC transporter B family member 19 OS=Arabidopsis thaliana GN=ABCB19 PE=1 SV=1	ATP-binding cassette, subfamily B (MDR/TAP), member 1	0.2371	0	Down
	Unigene12959	PREDICTED: uncharacterized protein LOC100255153 [Vitis vinifera]	ABC transporter B family member 26, chloroplastic OS=Arabidopsis thaliana GN=ABCB26 PE=1 SV=1	ATP-binding cassette, subfamily B (MDR/TAP), member 9	0.0572	0	Down
ABCC	Unigene5778	hypothetical protein OsI_01862 [Oryza sativa Indica Group]	ABC transporter C family member 14 OS=Arabidopsis thaliana GN=ABCC14 PE=1 SV=1	ATP-binding cassette, subfamily C (CFTR/MRP), member 2	21.8504	104.562	Up
	Unigene25676	PREDICTED: ABC transporter C family member 14-like [Fragaria vesca subsp. vesca]	ABC transporter C family member 4 OS=Arabidopsis thaliana GN=ABCC4 PE=1 SV=2	ATP-binding cassette, subfamily C (CFTR/MRP), member 2	9.6603	46.0735	Up
	Unigene11756	multidrug resistance-associated protein 2, 6 (mrp2, 6), abc-transoprter, putative [Ricinus communis] >gi|223537625|gb|EEF39248.1| multidrug resistance-associated protein 2, 6 (mrp2, 6), abc-transoprter, putative [Ricinus communis]	ABC transporter C family member 14 OS=Arabidopsis thaliana GN=ABCC14 PE=1 SV=1	--	7.5268	27.1915	Up
	CL11397.Contig2	PREDICTED: ABC transporter C family member 10-like [Vitis vinifera]	ABC transporter C family member 10 OS=Arabidopsis thaliana GN=ABCC10 PE=2 SV=2	ATP-binding cassette, subfamily C (CFTR/MRP), member 2	50.3085	175.918	Up
	Unigene12635	PREDICTED: ABC transporter C family member 4-like [Solanum lycopersicum]	ABC transporter C family member 4 OS=Arabidopsis thaliana GN=ABCC4 PE=1 SV=2	--	4.7465	14.9562	Up
	Unigene17120	ATMRP4 [Arabidopsis lyrata subsp. lyrata] >gi|297326163|gb|EFH56583.1| ATMRP4 [Arabidopsis lyrata subsp. lyrata]	ABC transporter C family member 4 OS=Arabidopsis thaliana GN=ABCC4 PE=1 SV=2	ATP-binding cassette, subfamily C (CFTR/MRP), member 2	14.684	45.067	Up
	Unigene33750	PREDICTED: ABC transporter C family member 4-like [Vitis vinifera]	ABC transporter C family member 14 OS=Arabidopsis thaliana GN=ABCC14 PE=1 SV=1	--	3.052	8.5865	Up
	Unigene33731	unnamed protein product [Vitis vinifera]	ABC transporter C family member 2 OS=Arabidopsis thaliana GN=ABCC2 PE=1 SV=2	ATP-binding cassette, subfamily C (CFTR/MRP), member 2	0.9045	2.4202	Up
	Unigene19444	PREDICTED: ABC transporter C family member 2-like [Vitis vinifera]	ABC transporter C family member 2 OS=Arabidopsis thaliana GN=ABCC2 PE=1 SV=2	ATP-binding cassette, subfamily C (CFTR/MRP), member 2	2.9008	7.3914	Up
	Unigene10376	PREDICTED: ABC transporter C family member 4-like [Vitis vinifera]	ABC transporter C family member 14 OS=Arabidopsis thaliana GN=ABCC14 PE=1 SV=1	--	2.9333	6.8729	Up
	Unigene19445	PREDICTED: ABC transporter C family member 2 isoform 2 [Vitis vinifera]	ABC transporter C family member 2 OS=Arabidopsis thaliana GN=ABCC2 PE=1 SV=2	ATP-binding cassette, subfamily C (CFTR/MRP), member 2	2.1429	4.8718	Up
	CL4836.Contig7	PREDICTED: ABC transporter C family member 2 isoform 1 [Vitis vinifera] >gi|297740795|emb|CBI30977.3| unnamed protein product [Vitis vinifera]	ABC transporter C family member 2 OS=Arabidopsis thaliana GN=ABCC2 PE=1 SV=2	ATP-binding cassette, subfamily C (CFTR/MRP), member 2	0.1	0.2159	Up
	Unigene15243	PREDICTED: ABC transporter C family member 3-like [Vitis vinifera]	ABC transporter C family member 3 OS=Arabidopsis thaliana GN=ABCC3 PE=1 SV=1	ATP-binding cassette, subfamily C (CFTR/MRP), member 2	15.3229	32.6361	Up
	CL4836.Contig4	PREDICTED: ABC transporter C family member 2 isoform 2 [Vitis vinifera]	ABC transporter C family member 1 OS=Arabidopsis thaliana GN=ABCC1 PE=1 SV=1	--	0.4585	0.9381	Up
	Unigene19319	PREDICTED: ABC transporter C family member 4-like [Glycine max]	ABC transporter C family member 14 OS=Arabidopsis thaliana GN=ABCC14 PE=1 SV=1	--	7.4069	14.9182	Up
	Unigene8177	multidrug resistance protein ABC transporter family [Populus trichocarpa] >gi|222847620|gb|EEE85167.1| multidrug resistance protein ABC transporter family [Populus trichocarpa]	ABC transporter C family member 3 OS=Arabidopsis thaliana GN=ABCC3 PE=1 SV=1	ATP-binding cassette, subfamily C (CFTR/MRP), member 2	6.9782	13.1158	Up
	CL1731.Contig2	PREDICTED: ABC transporter C family member 3-like [Vitis vinifera]	ABC transporter C family member 3 OS=Arabidopsis thaliana GN=ABCC3 PE=1 SV=1	ATP-binding cassette, subfamily C (CFTR/MRP), member 2	2.1398	3.3831	Up
	CL3037.Contig1	hypothetical protein PRUPE_ppa000182mg [Prunus persica]	ABC transporter C family member 14 OS=Arabidopsis thaliana GN=ABCC14 PE=1 SV=1	ATP-binding cassette, subfamily C (CFTR/MRP), member 2	3.8531	6.061	Up
	CL1731.Contig4	PREDICTED: ABC transporter C family member 3-like [Vitis vinifera]	ABC transporter C family member 3 OS=Arabidopsis thaliana GN=ABCC3 PE=1 SV=1	ATP-binding cassette, subfamily C (CFTR/MRP), member 2	2.0167	3.0155	Up
	Unigene22437	hypothetical protein PRUPE_ppa000145mg [Prunus persica]	ABC transporter C family member 12 OS=Arabidopsis thaliana GN=ABCC12 PE=2 SV=1	ATP-binding cassette, subfamily C (CFTR/MRP), member 2	0.2937	0.4207	Up
	CL4836.Contig3	PREDICTED: ABC transporter C family member 2 isoform 2 [Vitis vinifera]	ABC transporter C family member 1 OS=Arabidopsis thaliana GN=ABCC1 PE=1 SV=1	--	1.5081	2.1306	Up
	CL3037.Contig2	hypothetical protein PRUPE_ppa000182mg [Prunus persica]	ABC transporter C family member 14 OS=Arabidopsis thaliana GN=ABCC14 PE=1 SV=1	ATP-binding cassette, subfamily C (CFTR/MRP), member 2	3.4515	4.8366	Up
	Unigene20839	hypothetical protein PRUPE_ppa000182mg [Prunus persica]	ABC transporter C family member 4 OS=Arabidopsis thaliana GN=ABCC4 PE=1 SV=2	ATP-binding cassette, subfamily C (CFTR/MRP), member 2	77.9981	103.062	Up
	Unigene832	PREDICTED: ABC transporter C family member 3-like [Solanum lycopersicum]	ABC transporter C family member 5 OS=Arabidopsis thaliana GN=ABCC5 PE=2 SV=2	--	8.6443	11.1057	Up
	CL9847.Contig1	PREDICTED: ABC transporter C family member 5-like [Fragaria vesca subsp. vesca]	ABC transporter C family member 5 OS=Arabidopsis thaliana GN=ABCC5 PE=2 SV=2	--	2.9566	3.7809	Up
	Unigene7631	PREDICTED: ABC transporter C family member 4-like [Vitis vinifera]	ABC transporter C family member 4 OS=Arabidopsis thaliana GN=ABCC4 PE=1 SV=2	--	9.7023	11.8872	Up
	Unigene13538	PREDICTED: ABC transporter C family member 4-like [Vitis vinifera]	ABC transporter C family member 4 OS=Arabidopsis thaliana GN=ABCC4 PE=1 SV=2	ATP-binding cassette, subfamily C (CFTR/MRP), member 2	85.1141	103.377	Up
	CL3037.Contig3	hypothetical protein PRUPE_ppa000182mg [Prunus persica]	ABC transporter C family member 4 OS=Arabidopsis thaliana GN=ABCC4 PE=1 SV=2	ATP-binding cassette, subfamily C (CFTR/MRP), member 2	37.2655	44.2565	Up
	CL741.Contig2	PREDICTED: bell-like homeodomain protein 1 [Solanum lycopersicum]	ABC transporter C family member 1 OS=Arabidopsis thaliana GN=ABCC1 PE=1 SV=1	solute carrier family 38 (sodium-coupled neutral amino acid transporter), member 2	3.5877	4.0256	Up
	CL4836.Contig2	PREDICTED: ABC transporter C family member 2 isoform 2 [Vitis vinifera]	ABC transporter C family member 1 OS=Arabidopsis thaliana GN=ABCC1 PE=1 SV=1	beta-fructofuranosidase [EC:3.2.1.26]	2.9879	3.3284	Up
	Unigene21538	multidrug resistance-associated protein 2, 6 (mrp2, 6), abc-transoprter, putative [Ricinus communis] >gi|223546054|gb|EEF47557.1| multidrug resistance-associated protein 2, 6 (mrp2, 6), abc-transoprter, putative [Ricinus communis]	ABC transporter C family member 9 OS=Arabidopsis thaliana GN=ABCC9 PE=2 SV=2	ATP-binding cassette, subfamily C (CFTR/MRP), member 2	13.7731	14.731	Up
	CL1731.Contig3	PREDICTED: ABC transporter C family member 3-like [Vitis vinifera]	ABC transporter C family member 3 OS=Arabidopsis thaliana GN=ABCC3 PE=1 SV=1	ATP-binding cassette, subfamily C (CFTR/MRP), member 2	1.6579	1.7698	Up
	CL10432.Contig1	hypothetical protein PRUPE_ppa000172mg [Prunus persica]	ABC transporter C family member 5 OS=Arabidopsis thaliana GN=ABCC5 PE=2 SV=2	glucose-1-phosphate adenylyltransferase [EC:2.7.7.27]	11.5914	11.9545	Up
	CL4836.Contig8	PREDICTED: ABC transporter C family member 2 isoform 1 [Vitis vinifera] >gi|297740795|emb|CBI30977.3| unnamed protein product [Vitis vinifera]	ABC transporter C family member 2 OS=Arabidopsis thaliana GN=ABCC2 PE=1 SV=2	ATP-binding cassette, subfamily C (CFTR/MRP), member 2	0.945	0.9331	Down
	Unigene1207	PREDICTED: ABC transporter C family member 10-like [Vitis vinifera]	ABC transporter C family member 10 OS=Arabidopsis thaliana GN=ABCC10 PE=2 SV=2	--	4.3129	4.1527	Down
	Unigene26466	hypothetical protein PRUPE_ppa000182mg [Prunus persica]	ABC transporter C family member 14 OS=Arabidopsis thaliana GN=ABCC14 PE=1 SV=1	--	90.5386	86.8197	Down
	CL8470.Contig1	PREDICTED: ABC transporter C family member 9-like [Fragaria vesca subsp. vesca]	ABC transporter C family member 9 OS=Arabidopsis thaliana GN=ABCC9 PE=2 SV=2	ATP-binding cassette, subfamily C (CFTR/MRP), member 2	5.1538	4.8192	Down
	Unigene16686	hypothetical protein PRUPE_ppa000182mg [Prunus persica]	ABC transporter C family member 14 OS=Arabidopsis thaliana GN=ABCC14 PE=1 SV=1	--	13.9077	12.9933	Down
	CL4836.Contig5	PREDICTED: ABC transporter C family member 2 isoform 2 [Vitis vinifera]	ABC transporter C family member 2 OS=Arabidopsis thaliana GN=ABCC2 PE=1 SV=2	ATP-binding cassette, subfamily C (CFTR/MRP), member 2	1.3882	1.2887	Down
	CL8470.Contig5	PREDICTED: ABC transporter C family member 9-like [Fragaria vesca subsp. vesca]	ABC transporter C family member 9 OS=Arabidopsis thaliana GN=ABCC9 PE=2 SV=2	ATP-binding cassette, subfamily C (CFTR/MRP), member 2	3.0762	2.7073	Down
	Unigene4369	unnamed protein product [Vitis vinifera]	ABC transporter C family member 13 OS=Arabidopsis thaliana GN=ABCC13 PE=2 SV=3	ATP-binding cassette, subfamily C (CFTR/MRP), member 2	8.286	7.2519	Down
	Unigene3197	unnamed protein product [Vitis vinifera]	ABC transporter C family member 1 OS=Arabidopsis thaliana GN=ABCC1 PE=1 SV=1	--	2.4354	2.0582	Down
	CL8470.Contig3	PREDICTED: ABC transporter C family member 9-like [Fragaria vesca subsp. vesca]	ABC transporter C family member 9 OS=Arabidopsis thaliana GN=ABCC9 PE=2 SV=2	ATP-binding cassette, subfamily C (CFTR/MRP), member 2	6.6191	5.5373	Down
	CL8470.Contig6	PREDICTED: ABC transporter C family member 9-like [Fragaria vesca subsp. vesca]	ABC transporter C family member 9 OS=Arabidopsis thaliana GN=ABCC9 PE=2 SV=2	ATP-binding cassette, subfamily C (CFTR/MRP), member 2	2.2641	1.741	Down
	CL11024.Contig1	Multidrug Resistance associated Protein 1 [Catharanthus roseus]	ABC transporter C family member 13 OS=Arabidopsis thaliana GN=ABCC13 PE=2 SV=3	ATP-binding cassette, subfamily C (CFTR/MRP), member 2	1.0687	0.7951	Down
	CL8470.Contig4	PREDICTED: ABC transporter C family member 9-like [Fragaria vesca subsp. vesca]	ABC transporter C family member 9 OS=Arabidopsis thaliana GN=ABCC9 PE=2 SV=2	ATP-binding cassette, subfamily C (CFTR/MRP), member 2	1.1195	0.7535	Down
	Unigene32136	PREDICTED: ABC transporter C family member 2 isoform 2 [Vitis vinifera]	ABC transporter C family member 2 OS=Arabidopsis thaliana GN=ABCC2 PE=1 SV=2	ATP-binding cassette, subfamily C (CFTR/MRP), member 2	12.9367	8.4221	Down
	CL4836.Contig6	PREDICTED: ABC transporter C family member 2 isoform 2 [Vitis vinifera]	ABC transporter C family member 2 OS=Arabidopsis thaliana GN=ABCC2 PE=1 SV=2	ATP-binding cassette, subfamily C (CFTR/MRP), member 2	1.0379	0.6534	Down
	CL8981.Contig2	unnamed protein product [Vitis vinifera]	ABC transporter C family member 3 OS=Arabidopsis thaliana GN=ABCC3 PE=1 SV=1	ATP-binding cassette, subfamily C (CFTR/MRP), member 2	3.5995	2.244	Down
	Unigene2463	PREDICTED: ABC transporter C family member 5-like [Vitis vinifera]	ABC transporter C family member 5 OS=Arabidopsis thaliana GN=ABCC5 PE=2 SV=2	ATP-binding cassette, subfamily C (CFTR/MRP), member 2	6.6147	4.0766	Down
	Unigene24933	PREDICTED: ABC transporter C family member 2-like [Fragaria vesca subsp. vesca]	ABC transporter C family member 2 OS=Arabidopsis thaliana GN=ABCC2 PE=1 SV=2	--	6.3961	3.817	Down
	CL1731.Contig1	hypothetical protein PRUPE_ppa022260mg, partial [Prunus persica]	ABC transporter C family member 3 OS=Arabidopsis thaliana GN=ABCC3 PE=1 SV=1	ATP-binding cassette, subfamily C (CFTR/MRP), member 2	63.4031	37.6401	Down
	CL2582.Contig1	PREDICTED: ABC transporter C family member 5-like [Solanum lycopersicum]	ABC transporter C family member 5 OS=Arabidopsis thaliana GN=ABCC5 PE=2 SV=2	ATP-binding cassette, subfamily C (CFTR/MRP), member 2	12.3246	7.2953	Down
	CL8981.Contig1	multidrug resistance-associated protein 2, 6 (mrp2, 6), abc-transoprter, putative [Ricinus communis] >gi|223546054|gb|EEF47557.1| multidrug resistance-associated protein 2, 6 (mrp2, 6), abc-transoprter, putative [Ricinus communis]	ABC transporter C family member 3 OS=Arabidopsis thaliana GN=ABCC3 PE=1 SV=1	--	1.8219	1.0355	Down
	Unigene18390	PREDICTED: ABC transporter C family member 3-like [Solanum lycopersicum]	ABC transporter C family member 7 OS=Arabidopsis thaliana GN=ABCC7 PE=2 SV=1	ATP-binding cassette, subfamily C (CFTR/MRP), member 2	3.3094	1.8809	Down
	CL4836.Contig1	PREDICTED: ABC transporter C family member 2 isoform 1 [Vitis vinifera] >gi|297740795|emb|CBI30977.3| unnamed protein product [Vitis vinifera]	ABC transporter C family member 2 OS=Arabidopsis thaliana GN=ABCC2 PE=1 SV=2	ATP-binding cassette, subfamily C (CFTR/MRP), member 2	7.4733	4.1559	Down
	CL8470.Contig2	PREDICTED: ABC transporter C family member 9-like [Vitis vinifera]	ABC transporter C family member 9 OS=Arabidopsis thaliana GN=ABCC9 PE=2 SV=2	ATP-binding cassette, subfamily C (CFTR/MRP), member 2	22.3868	12.3297	Down
	Unigene14163	PREDICTED: ABC transporter C family member 10-like [Vitis vinifera]	ABC transporter C family member 10 OS=Arabidopsis thaliana GN=ABCC10 PE=2 SV=2	--	3.0497	1.404	Down
	CL11024.Contig2	Multidrug Resistance associated Protein 1 [Catharanthus roseus]	ABC transporter C family member 13 OS=Arabidopsis thaliana GN=ABCC13 PE=2 SV=3	ATP-binding cassette, subfamily C (CFTR/MRP), member 2	2.451	1.068	Down
	Unigene13008	unnamed protein product [Vitis vinifera]	ABC transporter C family member 1 OS=Arabidopsis thaliana GN=ABCC1 PE=1 SV=1	--	1.3211	0.5471	Down
	Unigene22436	PREDICTED: uncharacterized protein LOC100259217 [Vitis vinifera] >gi|302142661|emb|CBI19864.3| unnamed protein product [Vitis vinifera]	ABC transporter C family member 1 OS=Arabidopsis thaliana GN=ABCC1 PE=1 SV=1	--	0.2541	0.104	Down
	Unigene26136	unnamed protein product [Vitis vinifera]	ABC transporter C family member 5 OS=Arabidopsis thaliana GN=ABCC5 PE=2 SV=2	--	5.799	2.0874	Down
	Unigene28659	multidrug resistance protein ABC transporter family [Populus trichocarpa] >gi|222843567|gb|EEE81114.1| multidrug resistance protein ABC transporter family [Populus trichocarpa]	ABC transporter C family member 5 OS=Arabidopsis thaliana GN=ABCC5 PE=2 SV=2	--	4.0206	1.4396	Down
	Unigene23595	hypothetical protein PRUPE_ppa000192mg [Prunus persica]	ABC transporter C family member 10 OS=Arabidopsis thaliana GN=ABCC10 PE=2 SV=2	ATP-binding cassette, subfamily C (CFTR/MRP), member 2	5.2169	1.8195	Down
	CL10432.Contig2	multidrug resistance-associated protein 2, 6 (mrp2, 6), abc-transoprter, putative [Ricinus communis] >gi|223534094|gb|EEF35811.1| multidrug resistance-associated protein 2, 6 (mrp2, 6), abc-transoprter, putative [Ricinus communis]	ABC transporter C family member 5 OS=Arabidopsis thaliana GN=ABCC5 PE=2 SV=2	--	7.7642	2.4651	Down
	CL9847.Contig2	PREDICTED: ABC transporter C family member 5-like [Fragaria vesca subsp. vesca]	ABC transporter C family member 5 OS=Arabidopsis thaliana GN=ABCC5 PE=2 SV=2	ATP-binding cassette, subfamily C (CFTR/MRP), member 2	5.8548	1.7278	Down
	Unigene11743	Multidrug Resistance associated Protein 1 [Catharanthus roseus]	ABC transporter C family member 13 OS=Arabidopsis thaliana GN=ABCC13 PE=2 SV=3	ATP-binding cassette, subfamily C (CFTR/MRP), member 2	7.6865	1.9404	Down
	Unigene27921	PREDICTED: ABC transporter C family member 13-like [Vitis vinifera]	ABC transporter C family member 13 OS=Arabidopsis thaliana GN=ABCC13 PE=2 SV=3	--	6.2365	1.3432	Down
ABCD	CL2191.Contig6	hypothetical protein VITISV_025957 [Vitis vinifera]	ABC transporter D family member 1 OS=Arabidopsis thaliana GN=ABCC1 PE=1 SV=1	ATP-binding cassette, subfamily D (ALD), member 3	0.6536	1.7947	Up
	Unigene2589	PREDICTED: ABC transporter D family member 1-like [Solanum lycopersicum]	ABC transporter D family member 1 OS=Arabidopsis thaliana GN=ABCC1 PE=1 SV=1	--	0.4801	1.1462	Up
	Unigene2590	PREDICTED: ABC transporter D family member 1-like [Solanum lycopersicum]	ABC transporter D family member 1 OS=Arabidopsis thaliana GN=ABCC1 PE=1 SV=1	--	2.7983	5.4529	Up
	Unigene20001	hypothetical protein PRUPE_ppa002750mg [Prunus persica]	ABC transporter D family member 2, chloroplastic OS=Arabidopsis thaliana GN=ABCC2 PE=1 SV=1	ATP-binding cassette, subfamily D (ALD), member 3	6.3213	8.5942	Up
	Unigene33702	PREDICTED: ABC transporter D family member 1-like [Solanum lycopersicum]	ABC transporter D family member 1 OS=Arabidopsis thaliana GN=ABCC1 PE=1 SV=1	ATP-binding cassette, subfamily D (ALD), member 3	1.7862	2.3082	Up
	Unigene22979	hypothetical protein PRUPE_ppa000291mg [Prunus persica]	ABC transporter D family member 1 OS=Arabidopsis thaliana GN=ABCC1 PE=1 SV=1	ATP-binding cassette, subfamily D (ALD), member 3	9.8916	11.8872	Up
	CL2191.Contig5	hypothetical protein VITISV_025957 [Vitis vinifera]	ABC transporter D family member 1 OS=Arabidopsis thaliana GN=ABCC1 PE=1 SV=1	ATP-binding cassette, subfamily D (ALD), member 3	1.1658	1.3418	Up
	CL2191.Contig7	PREDICTED: ABC transporter D family member 1-like isoform 2 [Glycine max]	ABC transporter D family member 1 OS=Arabidopsis thaliana GN=ABCC1 PE=1 SV=1	ATP-binding cassette, subfamily D (ALD), member 3	2.054	2.2923	Up
	CL501.Contig5	hypothetical protein PRUPE_ppa000291mg [Prunus persica]	ABC transporter D family member 1 OS=Arabidopsis thaliana GN=ABCC1 PE=1 SV=1	ATP-binding cassette, subfamily D (ALD), member 3	4.9648	5.3284	Up
	CL501.Contig3	hypothetical protein PRUPE_ppa000291mg [Prunus persica]	ABC transporter D family member 1 OS=Arabidopsis thaliana GN=ABCC1 PE=1 SV=1	(S)-2-hydroxy-acid oxidase [EC:1.1.3.15]	1.0058	1.0702	Up
	CL2191.Contig16	hypothetical protein PRUPE_ppa000291mg [Prunus persica]	ABC transporter D family member 1 OS=Arabidopsis thaliana GN=ABCC1 PE=1 SV=1	ATP-binding cassette, subfamily D (ALD), member 3	12.9613	11.6069	Down
	CL2191.Contig20	peroxisomal membrane ABC transporter family, PMP family [Populus trichocarpa] >gi|222856539|gb|EEE94086.1| peroxisomal membrane ABC transporter family, PMP family [Populus trichocarpa]	ABC transporter D family member 1 OS=Arabidopsis thaliana GN=ABCC1 PE=1 SV=1	ATP-binding cassette, subfamily D (ALD), member 3	3.368	2.9287	Down
	Unigene843	unnamed protein product [Vitis vinifera]	ABC transporter D family member 2, chloroplastic OS=Arabidopsis thaliana GN=ABCC2 PE=1 SV=1	--	5.6059	4.8661	Down
	Unigene9179	unnamed protein product [Vitis vinifera]	ABC transporter D family member 2, chloroplastic OS=Arabidopsis thaliana GN=ABCC2 PE=1 SV=1	--	10.1119	8.464	Down
	CL2191.Contig13	hypothetical protein VITISV_025957 [Vitis vinifera]	ABC transporter D family member 1 OS=Arabidopsis thaliana GN=ABCC1 PE=1 SV=1	ATP-binding cassette, subfamily D (ALD), member 3	3.6279	3.0319	Down
	CL501.Contig2	hypothetical protein PRUPE_ppa000291mg [Prunus persica]	ABC transporter D family member 1 OS=Arabidopsis thaliana GN=ABCC1 PE=1 SV=1	(S)-2-hydroxy-acid oxidase [EC:1.1.3.15]	3.719	2.3665	Down
ABCE	Unigene9763	unnamed protein product [Vitis vinifera]	ABC transporter E family member 2 OS=Arabidopsis thaliana GN=ABCE2 PE=2 SV=1	ATP-binding cassette, sub-family E, member 1	94.8517	64.6651	Down
ABCF	CL2002.Contig1	PREDICTED: phosphatidylinositide phosphatase SAC1-like isoform 1 [Vitis vinifera]	COBRA-like protein 2 OS=Oryza sativa subsp. japonica GN=BC1L2 PE=2 SV=1	ATP-binding cassette, subfamily F, member 2	0.0754	0.3854	Up
	CL2002.Contig2	PREDICTED: phosphatidylinositide phosphatase SAC1-like isoform 1 [Vitis vinifera]	COBRA-like protein 2 OS=Oryza sativa subsp. japonica GN=BC1L2 PE=2 SV=1	ATP-binding cassette, subfamily F, member 2	0.516	0.9118	Up
	CL9016.Contig1	PREDICTED: zinc finger CCCH domain-containing protein 11-like [Cucumis sativus] >gi|449507579|ref|XP_004163072.1| PREDICTED: zinc finger CCCH domain-containing protein 11-like [Cucumis sativus]	Zinc finger CCCH domain-containing protein 21 OS=Arabidopsis thaliana GN=At2g20280 PE=4 SV=1	ATP-binding cassette, subfamily F, member 2	0.2178	0.2785	Up
	Unigene13715	PREDICTED: zinc finger CCCH domain-containing protein 11-like [Glycine max]	Zinc finger CCCH domain-containing protein 11 OS=Oryza sativa subsp. japonica GN=Os01g0834700 PE=2 SV=2	ATP-binding cassette, subfamily F, member 2	6.3611	8.0261	Up
	CL8465.Contig2	predicted protein [Populus trichocarpa] >gi|222868850|gb|EEF05981.1| predicted protein [Populus trichocarpa]	--	ATP-binding cassette, subfamily F, member 2	14.2901	13.6607	Up
	CL6325.Contig5	hypothetical protein VITISV_004172 [Vitis vinifera]	Uncharacterized methyltransferase At2g41040, chloroplastic OS=Arabidopsis thaliana GN=At2g41040 PE=1 SV=1	ATP-binding cassette, subfamily F, member 2	12.5716	11.7738	Up
	CL8872.Contig2	predicted protein [Populus trichocarpa] >gi|222851870|gb|EEE89417.1| predicted protein [Populus trichocarpa]	Zinc finger CCCH domain-containing protein 11 OS=Oryza sativa subsp. japonica GN=Os01g0834700 PE=2 SV=2	ATP-binding cassette, subfamily F, member 2	2.1438	1.7546	Up
	Unigene4161	PREDICTED: uncharacterized methyltransferase At1g78140, chloroplastic-like [Glycine max]	Uncharacterized methyltransferase At1g78140, chloroplastic OS=Arabidopsis thaliana GN=At1g78140 PE=1 SV=1	ATP-binding cassette, subfamily F, member 2	4.1628	3.3329	Up
	CL8872.Contig1	predicted protein [Populus trichocarpa] >gi|222851870|gb|EEE89417.1| predicted protein [Populus trichocarpa]	Zinc finger CCCH domain-containing protein 11 OS=Oryza sativa subsp. japonica GN=Os01g0834700 PE=2 SV=2	ATP-binding cassette, subfamily F, member 2	3.199	2.3226	Up
	CL9016.Contig2	PREDICTED: zinc finger CCCH domain-containing protein 11-like [Cucumis sativus] >gi|449507579|ref|XP_004163072.1| PREDICTED: zinc finger CCCH domain-containing protein 11-like [Cucumis sativus]	Zinc finger CCCH domain-containing protein 21 OS=Arabidopsis thaliana GN=At2g20280 PE=4 SV=1	ATP-binding cassette, subfamily F, member 2	8.5845	5.9493	Up
	CL6325.Contig2	PREDICTED: uncharacterized methyltransferase At2g41040, chloroplastic-like [Fragaria vesca subsp. vesca]	Uncharacterized methyltransferase At2g41040, chloroplastic OS=Arabidopsis thaliana GN=At2g41040 PE=1 SV=1	ATP-binding cassette, subfamily F, member 2	3.5106	2.2535	Up
	CL2002.Contig3	PREDICTED: phosphatidylinositide phosphatase SAC1-like isoform 1 [Vitis vinifera]	ABC transporter F family member 1 OS=Arabidopsis thaliana GN=ABCF1 PE=1 SV=1	ATP-binding cassette, subfamily F, member 2	0.1009	0.4818	Up
	CL2002.Contig5	hypothetical protein VITISV_027268 [Vitis vinifera]	ABC transporter F family member 1 OS=Arabidopsis thaliana GN=ABCF1 PE=1 SV=1	ATP-binding cassette, subfamily F, member 2	0.307	0.7852	Up
	Unigene2512	hypothetical protein SORBIDRAFT_07g023740 [Sorghum bicolor] >gi|241940904|gb|EES14049.1| hypothetical protein SORBIDRAFT_07g023740 [Sorghum bicolor]	ABC transporter F family member 1 OS=Arabidopsis thaliana GN=ABCF1 PE=1 SV=1	ATP-binding cassette, subfamily F, member 2	14.6478	35.6954	Up
	CL2002.Contig4	PREDICTED: phosphatidylinositide phosphatase SAC1-like isoform 1 [Vitis vinifera]	ABC transporter F family member 1 OS=Arabidopsis thaliana GN=ABCF1 PE=1 SV=1	ATP-binding cassette, subfamily F, member 2	0.2744	0.3509	Up
	CL3574.Contig8	PREDICTED: ABC transporter F family member 3 [Vitis vinifera] >gi|297742399|emb|CBI34548.3| unnamed protein product [Vitis vinifera]	ABC transporter F family member 3 OS=Arabidopsis thaliana GN=ABCF3 PE=2 SV=1	ATP-binding cassette, subfamily F, member 3	1.2157	1.4401	Up
	Unigene21018	PREDICTED: ABC transporter F family member 3 [Vitis vinifera] >gi|297742399|emb|CBI34548.3| unnamed protein product [Vitis vinifera]	ABC transporter F family member 3 OS=Arabidopsis thaliana GN=ABCF3 PE=2 SV=1	ATP-binding cassette, subfamily F, member 3	3.9238	4.2732	Up
	CL2002.Contig6	unnamed protein product [Vitis vinifera]	ABC transporter F family member 1 OS=Arabidopsis thaliana GN=ABCF1 PE=1 SV=1	ATP-binding cassette, subfamily F, member 2	1.4205	1.4895	Up
	CL1011.Contig2	PREDICTED: ABC transporter F family member 3 [Vitis vinifera] >gi|297742399|emb|CBI34548.3| unnamed protein product [Vitis vinifera]	ABC transporter F family member 3 OS=Arabidopsis thaliana GN=ABCF3 PE=2 SV=1	ATP-binding cassette, subfamily F, member 3	1.5542	1.5143	Down
	Unigene13121	PREDICTED: ABC transporter F family member 3 [Vitis vinifera] >gi|297742399|emb|CBI34548.3| unnamed protein product [Vitis vinifera]	ABC transporter F family member 3 OS=Arabidopsis thaliana GN=ABCF3 PE=2 SV=1	ATP-binding cassette, subfamily F, member 3	2.9281	2.7398	Down
	CL1011.Contig7	PREDICTED: ABC transporter F family member 3 [Vitis vinifera] >gi|297742399|emb|CBI34548.3| unnamed protein product [Vitis vinifera]	ABC transporter F family member 3 OS=Arabidopsis thaliana GN=ABCF3 PE=2 SV=1	ATP-binding cassette, subfamily F, member 3	0.8214	0.764	Down
	Unigene12977	PREDICTED: ABC transporter F family member 5 [Vitis vinifera]	ABC transporter F family member 5 OS=Arabidopsis thaliana GN=ABCF5 PE=2 SV=1	ATP-binding cassette, subfamily F, member 2	0.5552	0.5112	Down
	CL3309.Contig2	unnamed protein product [Vitis vinifera]	ABC transporter F family member 2 OS=Arabidopsis thaliana GN=ABCF2 PE=3 SV=2	WRKY transcription factor 33	2.2469	1.9703	Down
	CL1011.Contig6	PREDICTED: ABC transporter F family member 3 [Vitis vinifera] >gi|297742399|emb|CBI34548.3| unnamed protein product [Vitis vinifera]	ABC transporter F family member 3 OS=Arabidopsis thaliana GN=ABCF3 PE=2 SV=1	ATP-binding cassette, subfamily F, member 3	2.1518	1.8792	Down
	CL1432.Contig1	ABC transporter family protein [Populus trichocarpa] >gi|222850705|gb|EEE88252.1| ABC transporter family protein [Populus trichocarpa]	ABC transporter F family member 1 OS=Arabidopsis thaliana GN=ABCF1 PE=1 SV=1	ATP-binding cassette, subfamily F, member 2	133.635	115.705	Down
	CL1011.Contig5	PREDICTED: ABC transporter F family member 3 [Vitis vinifera] >gi|297742399|emb|CBI34548.3| unnamed protein product [Vitis vinifera]	ABC transporter F family member 3 OS=Arabidopsis thaliana GN=ABCF3 PE=2 SV=1	ATP-binding cassette, subfamily F, member 3	0.6116	0.5294	Down
	CL1011.Contig3	PREDICTED: ABC transporter F family member 3 [Vitis vinifera] >gi|297742399|emb|CBI34548.3| unnamed protein product [Vitis vinifera]	ABC transporter F family member 3 OS=Arabidopsis thaliana GN=ABCF3 PE=2 SV=1	ATP-binding cassette, subfamily F, member 3	0.7399	0.6105	Down
	Unigene12976	PREDICTED: ABC transporter F family member 5 [Vitis vinifera]	ABC transporter F family member 5 OS=Arabidopsis thaliana GN=ABCF5 PE=2 SV=1	ATP-binding cassette, subfamily F, member 2	4.211	3.4075	Down
	Unigene30097	PREDICTED: ABC transporter F family member 3 [Vitis vinifera] >gi|297742399|emb|CBI34548.3| unnamed protein product [Vitis vinifera]	ABC transporter F family member 3 OS=Arabidopsis thaliana GN=ABCF3 PE=2 SV=1	ATP-binding cassette, subfamily F, member 3	2.7084	2.1122	Down
	CL11674.Contig1	PREDICTED: prostaglandin E synthase 2-like [Solanum lycopersicum]	ABC transporter F family member 3 OS=Arabidopsis thaliana GN=ABCF3 PE=2 SV=1	microsomal prostaglandin-E synthase 2 [EC:5.3.99.3]	5.0178	3.7109	Down
	CL1011.Contig4	PREDICTED: ABC transporter F family member 3-like [Cucumis sativus]	ABC transporter F family member 3 OS=Arabidopsis thaliana GN=ABCF3 PE=2 SV=1	ATP-binding cassette, subfamily F, member 3	2.8261	2.0855	Down
	Unigene30098	PREDICTED: ABC transporter F family member 3 [Vitis vinifera] >gi|297742399|emb|CBI34548.3| unnamed protein product [Vitis vinifera]	ABC transporter F family member 3 OS=Arabidopsis thaliana GN=ABCF3 PE=2 SV=1	ATP-binding cassette, subfamily F, member 3	1.8081	1.3262	Down
	Unigene22349	PREDICTED: ABC transporter F family member 3 [Vitis vinifera] >gi|297742399|emb|CBI34548.3| unnamed protein product [Vitis vinifera]	ABC transporter F family member 3 OS=Arabidopsis thaliana GN=ABCF3 PE=2 SV=1	ATP-binding cassette, subfamily F, member 3	7.5024	5.4288	Down
	Unigene2650	hypothetical protein PRUPE_ppa002106mg [Prunus persica]	ABC transporter F family member 5 OS=Arabidopsis thaliana GN=ABCF5 PE=2 SV=1	ATP-binding cassette, subfamily F, member 1	10.1592	7.2265	Down
	Unigene30096	PREDICTED: ABC transporter F family member 3 [Vitis vinifera] >gi|297742399|emb|CBI34548.3| unnamed protein product [Vitis vinifera]	ABC transporter F family member 3 OS=Arabidopsis thaliana GN=ABCF3 PE=2 SV=1	ATP-binding cassette, subfamily F, member 3	1.2831	0.8751	Down
	Unigene8780	PREDICTED: ABC transporter F family member 4-like [Vitis vinifera]	ABC transporter F family member 4 OS=Arabidopsis thaliana GN=ABCF4 PE=2 SV=1	ATP-binding cassette, subfamily F, member 1	24.0771	15.363	Down
	Unigene630	PREDICTED: ABC transporter F family member 5 [Vitis vinifera]	ABC transporter F family member 5 OS=Arabidopsis thaliana GN=ABCF5 PE=2 SV=1	ATP-binding cassette, subfamily F, member 2	19.4413	11.913	Down
	CL1011.Contig1	PREDICTED: ABC transporter F family member 3-like [Cucumis sativus]	ABC transporter F family member 3 OS=Arabidopsis thaliana GN=ABCF3 PE=2 SV=1	ATP-binding cassette, subfamily F, member 3	1.4993	0.8947	Down
	Unigene12978	PREDICTED: ABC transporter F family member 5 [Vitis vinifera]	ABC transporter F family member 5 OS=Arabidopsis thaliana GN=ABCF5 PE=2 SV=1	ATP-binding cassette, subfamily F, member 2	1.2497	0.7306	Down
	Unigene1241	PREDICTED: ABC transporter F family member 3 [Vitis vinifera] >gi|297742399|emb|CBI34548.3| unnamed protein product [Vitis vinifera]	ABC transporter F family member 3 OS=Arabidopsis thaliana GN=ABCF3 PE=2 SV=1	ATP-binding cassette, subfamily F, member 3	0.2269	0.0995	Down
	Unigene30095	PREDICTED: ABC transporter F family member 3 [Vitis vinifera] >gi|297742399|emb|CBI34548.3| unnamed protein product [Vitis vinifera]	ABC transporter F family member 3 OS=Arabidopsis thaliana GN=ABCF3 PE=2 SV=1	ATP-binding cassette, subfamily F, member 3	0.2225	0.0975	Down
ABCG	CL45.Contig3	PREDICTED: pleiotropic drug resistance protein 1-like [Vitis vinifera]	Pleiotropic drug resistance protein TUR2 OS=Spirodela polyrrhiza GN=TUR2 PE=1 SV=1	ATP-binding cassette, subfamily G (WHITE), member 2	47.9082	118.507	Up
	CL418.Contig1	PREDICTED: pleiotropic drug resistance protein 3-like isoform 1 [Solanum lycopersicum]	Pleiotropic drug resistance protein 3 OS=Nicotiana tabacum GN=PDR3 PE=2 SV=1	ATP-binding cassette, subfamily G (WHITE), member 2	2.1858	5.2177	Up
	Unigene21687	predicted protein [Populus trichocarpa] >gi|222841288|gb|EEE78835.1| predicted protein [Populus trichocarpa]	Pleiotropic drug resistance protein TUR2 OS=Spirodela polyrrhiza GN=TUR2 PE=1 SV=1	ATP-binding cassette, subfamily G (WHITE), member 2	34.3896	80.0923	Up
	CL45.Contig2	hypothetical protein VITISV_025401 [Vitis vinifera]	Pleiotropic drug resistance protein 4 OS=Oryza sativa subsp. japonica GN=PDR4 PE=2 SV=1	ATP-binding cassette, subfamily G (WHITE), member 2	62.6497	101.685	Up
	CL10813.Contig11	PREDICTED: pleiotropic drug resistance protein 3-like isoform 1 [Solanum lycopersicum]	Pleiotropic drug resistance protein 3 OS=Nicotiana tabacum GN=PDR3 PE=2 SV=1	ATP-binding cassette, subfamily G (WHITE), member 2	6.4696	10.0103	Up
	CL1490.Contig4	ATP-binding cassette transporter, putative [Ricinus communis] >gi|223546806|gb|EEF48304.1| ATP-binding cassette transporter, putative [Ricinus communis]	Pleiotropic drug resistance protein 1 OS=Nicotiana tabacum GN=PDR1 PE=2 SV=1	ATP-binding cassette, subfamily G (WHITE), member 2	19.8466	22.5989	Up
	Unigene12975	unnamed protein product [Vitis vinifera]	Pleiotropic drug resistance protein 1 OS=Nicotiana tabacum GN=PDR1 PE=2 SV=1	ATP-binding cassette, subfamily G (WHITE), member 2	152.519	166.623	Up
	CL11474.Contig4	Pleiotropic drug resistance protein [Medicago truncatula] >gi|355486867|gb|AES68070.1| Pleiotropic drug resistance protein [Medicago truncatula]	Pleiotropic drug resistance protein 4 OS=Oryza sativa subsp. japonica GN=PDR4 PE=2 SV=1	ATP-binding cassette, subfamily G (WHITE), member 2	83.7687	85.9291	Up
	Unigene29593	hypothetical protein PRUPE_ppa000229mg [Prunus persica]	Pleiotropic drug resistance protein 15 OS=Oryza sativa subsp. japonica GN=PDR15 PE=3 SV=1	ATP-binding cassette, subfamily G (WHITE), member 2	0.2332	0.2386	Up
	CL10235.Contig3	PREDICTED: pleiotropic drug resistance protein 1 isoform 2 [Vitis vinifera]	Pleiotropic drug resistance protein 1 OS=Nicotiana tabacum GN=PDR1 PE=2 SV=1	ATP-binding cassette, subfamily G (WHITE), member 2	116.971	113.433	Down
	CL45.Contig5	PREDICTED: pleiotropic drug resistance protein 1-like [Vitis vinifera]	Pleiotropic drug resistance protein 1 OS=Nicotiana tabacum GN=PDR1 PE=2 SV=1	ATP-binding cassette, subfamily G (WHITE), member 2	85.2758	78.2657	Down
	CL1490.Contig5	RecName: Full=Pleiotropic drug resistance protein 1; AltName: Full=NtPDR1 >gi|41052472|dbj|BAD07483.1| PDR-type ABC transporter 1 [Nicotiana tabacum]	Pleiotropic drug resistance protein 1 OS=Nicotiana tabacum GN=PDR1 PE=2 SV=1	ATP-binding cassette, subfamily G (WHITE), member 2	77.7085	68.6923	Down
	Unigene14330	PREDICTED: pleiotropic drug resistance protein 1-like [Solanum lycopersicum]	Pleiotropic drug resistance protein TUR2 OS=Spirodela polyrrhiza GN=TUR2 PE=1 SV=1	ATP-binding cassette, subfamily G (WHITE), member 2	175.681	150.557	Down
	CL1273.Contig1	PREDICTED: ABC transporter G family member 32-like [Solanum lycopersicum]	Pleiotropic drug resistance protein 6 OS=Oryza sativa subsp. japonica GN=PDR6 PE=2 SV=3	ATP-binding cassette, subfamily G (WHITE), member 2	10.7647	8.8264	Down
	CL1490.Contig1	ATP-binding cassette transporter, putative [Ricinus communis] >gi|223546806|gb|EEF48304.1| ATP-binding cassette transporter, putative [Ricinus communis]	Pleiotropic drug resistance protein 1 OS=Nicotiana tabacum GN=PDR1 PE=2 SV=1	ATP-binding cassette, subfamily G (WHITE), member 2	14.6693	11.723	Down
	CL1490.Contig6	ATP-binding cassette transporter, putative [Ricinus communis] >gi|223533331|gb|EEF35083.1| ATP-binding cassette transporter, putative [Ricinus communis]	Pleiotropic drug resistance protein 1 OS=Nicotiana tabacum GN=PDR1 PE=2 SV=1	ATP-binding cassette, subfamily G (WHITE), member 2	25.5278	17.3606	Down
	CL11474.Contig1	unnamed protein product [Vitis vinifera]	Pleiotropic drug resistance protein 4 OS=Oryza sativa subsp. japonica GN=PDR4 PE=2 SV=1	ATP-binding cassette, subfamily G (WHITE), member 2	16.74	10.8295	Down
	Unigene13292	PREDICTED: pleiotropic drug resistance protein 1-like [Glycine max]	Pleiotropic drug resistance protein 1 OS=Nicotiana tabacum GN=PDR1 PE=2 SV=1	ATP-binding cassette, subfamily G (WHITE), member 2	70.795	45.238	Down
	Unigene21779	PREDICTED: pleiotropic drug resistance protein 1-like [Glycine max]	Pleiotropic drug resistance protein 1 OS=Nicotiana tabacum GN=PDR1 PE=2 SV=1	ATP-binding cassette, subfamily G (WHITE), member 2	47.9717	29.5239	Down
	Unigene18979	ABCG/PDR subfamily ABC protein [Petunia x hybrida]	Pleiotropic drug resistance protein 1 OS=Nicotiana tabacum GN=PDR1 PE=2 SV=1	ATP-binding cassette, subfamily G (WHITE), member 2	17.651	10.4354	Down
	CL6349.Contig9	PREDICTED: pleiotropic drug resistance protein 3-like [Fragaria vesca subsp. vesca]	Pleiotropic drug resistance protein 3 OS=Nicotiana tabacum GN=PDR3 PE=2 SV=1	ATP-binding cassette, subfamily G (WHITE), member 2	0.3491	0.1786	Down
	CL6349.Contig10	PREDICTED: pleiotropic drug resistance protein 3-like [Fragaria vesca subsp. vesca]	Pleiotropic drug resistance protein 3 OS=Nicotiana tabacum GN=PDR3 PE=2 SV=1	ATP-binding cassette, subfamily G (WHITE), member 2	0.1442	0.0671	Down
	CL6349.Contig8	PREDICTED: pleiotropic drug resistance protein 3-like [Fragaria vesca subsp. vesca]	Pleiotropic drug resistance protein 3 OS=Nicotiana tabacum GN=PDR3 PE=2 SV=1	ATP-binding cassette, subfamily G (WHITE), member 2	0.5747	0.252	Down
	CL6349.Contig7	PREDICTED: pleiotropic drug resistance protein 3-like [Fragaria vesca subsp. vesca]	Pleiotropic drug resistance protein 3 OS=Nicotiana tabacum GN=PDR3 PE=2 SV=1	ATP-binding cassette, subfamily G (WHITE), member 2	0.1336	0.0547	Down
	Unigene21378	RecName: Full=Pleiotropic drug resistance protein 3; AltName: Full=NtPDR3 >gi|55056942|emb|CAH39853.1| PDR-like ABC transporter [Nicotiana tabacum]	Pleiotropic drug resistance protein 3 OS=Nicotiana tabacum GN=PDR3 PE=2 SV=1	ATP-binding cassette, subfamily G (WHITE), member 2	6.3524	2.3016	Down
	CL4562.Contig3	unnamed protein product [Vitis vinifera]	ABC transporter G family member 24 OS=Arabidopsis thaliana GN=ABCG24 PE=1 SV=2	--	0	0.1939	Down
	CL2980.Contig1	PREDICTED: pleiotropic drug resistance protein 3-like [Fragaria vesca subsp. vesca]	ABC transporter G family member 37 OS=Arabidopsis thaliana GN=ABCG37 PE=2 SV=1	ATP-binding cassette, subfamily G (WHITE), member 2	0	0	Down
	CL2980.Contig6	PREDICTED: pleiotropic drug resistance protein 3-like [Fragaria vesca subsp. vesca]	ABC transporter G family member 37 OS=Arabidopsis thaliana GN=ABCG37 PE=2 SV=1	ATP-binding cassette, subfamily G (WHITE), member 2	0	0	Down
	CL297.Contig2	predicted protein [Populus trichocarpa] >gi|222866393|gb|EEF03524.1| predicted protein [Populus trichocarpa]	ABC transporter G family member 32 OS=Arabidopsis thaliana GN=ABCG32 PE=1 SV=1	--	0.4458	2.1282	Up
	Unigene31602	PREDICTED: ABC transporter G family member 10-like [Fragaria vesca subsp. vesca]	ABC transporter G family member 10 OS=Arabidopsis thaliana GN=ABCG10 PE=3 SV=1	U4/U6 small nuclear ribonucleoprotein PRP3	0.8628	3.5309	Up
	CL3569.Contig2	unnamed protein product [Vitis vinifera]	ABC transporter G family member 21 OS=Arabidopsis thaliana GN=ABCG21 PE=2 SV=2	ATP-binding cassette, subfamily G (WHITE), member 2	0.3177	0.8823	Up
	CL3569.Contig3	unnamed protein product [Vitis vinifera]	ABC transporter G family member 21 OS=Arabidopsis thaliana GN=ABCG21 PE=2 SV=2	ATP-binding cassette, subfamily G (WHITE), member 2	0.765	2.0796	Up
	Unigene12030	hypothetical protein PRUPE_ppa000236mg [Prunus persica]	ABC transporter G family member 32 OS=Arabidopsis thaliana GN=ABCG32 PE=1 SV=1	tyrosine decarboxylase [EC:4.1.1.25]	2.2274	5.317	Up
	Unigene23116	PREDICTED: pleiotropic drug resistance protein 3-like [Fragaria vesca subsp. vesca]	ABC transporter G family member 43 OS=Arabidopsis thaliana GN=ABCG43 PE=3 SV=1	ATP-binding cassette, subfamily G (WHITE), member 2	0.6196	1.3652	Up
	Unigene7664	unnamed protein product [Vitis vinifera]	ABC transporter G family member 10 OS=Arabidopsis thaliana GN=ABCG10 PE=3 SV=1	U4/U6 small nuclear ribonucleoprotein PRP3	1.5755	3.0222	Up
	Unigene32423	PREDICTED: ABC transporter G family member 32-like [Cucumis sativus]	ABC transporter G family member 32 OS=Arabidopsis thaliana GN=ABCG32 PE=1 SV=1	--	2.1821	4.1856	Up
	CL3569.Contig4	unnamed protein product [Vitis vinifera]	ABC transporter G family member 21 OS=Arabidopsis thaliana GN=ABCG21 PE=2 SV=2	ATP-binding cassette, subfamily G (WHITE), member 2	8.8274	15.313	Up
	Unigene19673	PREDICTED: ABC transporter G family member 10 [Vitis vinifera]	ABC transporter G family member 10 OS=Arabidopsis thaliana GN=ABCG10 PE=3 SV=1	U4/U6 small nuclear ribonucleoprotein PRP3	4.8962	8.2465	Up
	CL4599.Contig1	white-brown-complex ABC transporter family [Populus trichocarpa] >gi|222853241|gb|EEE90788.1| white-brown-complex ABC transporter family [Populus trichocarpa]	ABC transporter G family member 19 OS=Arabidopsis thaliana GN=ABCG19 PE=1 SV=1	U4/U6 small nuclear ribonucleoprotein PRP3	0.2713	0.4511	Up
	CL4562.Contig5	PREDICTED: ABC transporter G family member 28-like isoform 1 [Vitis vinifera]	ABC transporter G family member 28 OS=Arabidopsis thaliana GN=ABCG28 PE=3 SV=1	ATP-binding cassette, subfamily G (WHITE), member 2	0.3837	0.6067	Up
	Unigene30431	PREDICTED: ABC transporter G family member 14-like [Vitis vinifera] >gi|296085456|emb|CBI29188.3| unnamed protein product [Vitis vinifera]	ABC transporter G family member 14 OS=Arabidopsis thaliana GN=ABCG14 PE=2 SV=1	ATP-binding cassette, subfamily G (WHITE), member 2	10.8617	16.7972	Up
	CL4562.Contig2	PREDICTED: ABC transporter G family member 28-like [Vitis vinifera]	ABC transporter G family member 28 OS=Arabidopsis thaliana GN=ABCG28 PE=3 SV=1	--	0.2526	0.3876	Up
	CL6349.Contig3	PREDICTED: pleiotropic drug resistance protein 3-like [Fragaria vesca subsp. vesca]	ABC transporter G family member 39 OS=Arabidopsis thaliana GN=ABCG39 PE=3 SV=1	--	3.5764	5.3015	Up
	CL11602.Contig2	unnamed protein product [Vitis vinifera]	ABC transporter G family member 36 OS=Arabidopsis thaliana GN=ABCG36 PE=1 SV=1	U4/U6 small nuclear ribonucleoprotein PRP3	13.9905	20.6308	Up
	Unigene19467	PREDICTED: ABC transporter G family member 14-like [Vitis vinifera] >gi|296085456|emb|CBI29188.3| unnamed protein product [Vitis vinifera]	ABC transporter G family member 14 OS=Arabidopsis thaliana GN=ABCG14 PE=2 SV=1	--	13.1515	19.0368	Up
	CL4599.Contig4	white-brown-complex ABC transporter family [Populus trichocarpa] >gi|222853241|gb|EEE90788.1| white-brown-complex ABC transporter family [Populus trichocarpa]	ABC transporter G family member 19 OS=Arabidopsis thaliana GN=ABCG19 PE=1 SV=1	U4/U6 small nuclear ribonucleoprotein PRP3	1.3045	1.8589	Up
	Unigene31692	ATPDR3/PDR3 [Arabidopsis lyrata subsp. lyrata] >gi|297325079|gb|EFH55499.1| ATPDR3/PDR3 [Arabidopsis lyrata subsp. lyrata]	ABC transporter G family member 31 OS=Arabidopsis thaliana GN=ABCG31 PE=2 SV=1	--	19.4449	27.656	Up
	Unigene31669	unnamed protein product [Vitis vinifera]	ABC transporter G family member 32 OS=Arabidopsis thaliana GN=ABCG32 PE=1 SV=1	--	7.4664	10.5028	Up
	Unigene19384	predicted protein [Populus trichocarpa] >gi|222843270|gb|EEE80817.1| predicted protein [Populus trichocarpa]	ABC transporter G family member 37 OS=Arabidopsis thaliana GN=ABCG37 PE=2 SV=1	--	3.2276	4.5027	Up
	Unigene30354	--	ABC transporter G family member 41 OS=Arabidopsis thaliana GN=ABCG41 PE=2 SV=1	--	0.6181	0.8431	Up
	CL10235.Contig2	ATP-binding cassette transporter, putative [Ricinus communis] >gi|223547739|gb|EEF49231.1| ATP-binding cassette transporter, putative [Ricinus communis]	ABC transporter G family member 40 OS=Arabidopsis thaliana GN=ABCG40 PE=1 SV=1	--	16.2879	22.1738	Up
	CL10813.Contig6	hypothetical protein PRUPE_ppa000249mg [Prunus persica]	ABC transporter G family member 30 OS=Arabidopsis thaliana GN=ABCG30 PE=2 SV=2	glucose-1-phosphate adenylyltransferase [EC:2.7.7.27]	2.8457	3.6675	Up
	CL10813.Contig5	hypothetical protein PRUPE_ppa000249mg [Prunus persica]	ABC transporter G family member 30 OS=Arabidopsis thaliana GN=ABCG30 PE=2 SV=2	glucose-1-phosphate adenylyltransferase [EC:2.7.7.27]	2.6838	3.4417	Up
	CL10813.Contig7	PREDICTED: pleiotropic drug resistance protein 3-like isoform 1 [Solanum lycopersicum]	ABC transporter G family member 30 OS=Arabidopsis thaliana GN=ABCG30 PE=2 SV=2	glucose-1-phosphate adenylyltransferase [EC:2.7.7.27]	2.8042	3.5961	Up
	Unigene15903	predicted protein [Populus trichocarpa] >gi|222843270|gb|EEE80817.1| predicted protein [Populus trichocarpa]	ABC transporter G family member 41 OS=Arabidopsis thaliana GN=ABCG41 PE=2 SV=1	ATP-binding cassette, subfamily G (WHITE), member 2	0.4054	0.5105	Up
	CL11474.Contig3	PREDICTED: pleiotropic drug resistance protein 1-like [Vitis vinifera]	ABC transporter G family member 40 OS=Arabidopsis thaliana GN=ABCG40 PE=1 SV=1	--	3.615	4.4907	Up
	CL10813.Contig14	PREDICTED: pleiotropic drug resistance protein 3-like isoform 1 [Solanum lycopersicum]	ABC transporter G family member 30 OS=Arabidopsis thaliana GN=ABCG30 PE=2 SV=2	glucose-1-phosphate adenylyltransferase [EC:2.7.7.27]	4.3633	5.3505	Up
	Unigene2970	PREDICTED: ABC transporter G family member 26-like [Vitis vinifera] >gi|296089962|emb|CBI39781.3| unnamed protein product [Vitis vinifera]	ABC transporter G family member 26 OS=Arabidopsis thaliana GN=ABCG26 PE=2 SV=2	ATP-binding cassette, subfamily G (WHITE), member 2	13.3993	16.3735	Up
	Unigene21455	PREDICTED: ABC transporter G family member 26-like [Solanum lycopersicum]	ABC transporter G family member 26 OS=Arabidopsis thaliana GN=ABCG26 PE=2 SV=2	ATP-binding cassette, subfamily G (WHITE), member 2	10.8857	13.2637	Up
	Unigene23117	PREDICTED: pleiotropic drug resistance protein 3-like [Fragaria vesca subsp. vesca]	ABC transporter G family member 33 OS=Arabidopsis thaliana GN=ABCG33 PE=2 SV=1	--	0.4944	0.5901	Up
	Unigene33001	PREDICTED: pleiotropic drug resistance protein 3-like [Fragaria vesca subsp. vesca]	ABC transporter G family member 37 OS=Arabidopsis thaliana GN=ABCG37 PE=2 SV=1	ATP-binding cassette, subfamily G (WHITE), member 2	6.1335	7.2334	Up
	CL2797.Contig3	PREDICTED: ABC transporter G family member 3 [Vitis vinifera] >gi|297734935|emb|CBI17169.3| unnamed protein product [Vitis vinifera]	ABC transporter G family member 3 OS=Arabidopsis thaliana GN=ABCG3 PE=1 SV=2	long-chain acyl-CoA synthetase [EC:6.2.1.3]	0.5052	0.5907	Up
	Unigene12338	predicted protein [Populus trichocarpa] >gi|222843270|gb|EEE80817.1| predicted protein [Populus trichocarpa]	ABC transporter G family member 35 OS=Arabidopsis thaliana GN=ABCG35 PE=2 SV=1	ATP-binding cassette, subfamily G (WHITE), member 2	0.3972	0.4643	Up
	CL1287.Contig3	PREDICTED: ABC transporter G family member 22-like [Solanum lycopersicum]	ABC transporter G family member 22 OS=Arabidopsis thaliana GN=ABCG22 PE=1 SV=1	--	6.1752	7.0911	Up
	Unigene6477	PREDICTED: pleiotropic drug resistance protein 2-like [Fragaria vesca subsp. vesca]	ABC transporter G family member 34 OS=Arabidopsis thaliana GN=ABCG34 PE=2 SV=1	ATP-binding cassette, subfamily G (WHITE), member 2	5.5457	6.0787	Up
	Unigene14995	predicted protein [Populus trichocarpa] >gi|222843270|gb|EEE80817.1| predicted protein [Populus trichocarpa]	ABC transporter G family member 41 OS=Arabidopsis thaliana GN=ABCG41 PE=2 SV=1	U4/U6 small nuclear ribonucleoprotein PRP3	0.5637	0.6151	Up
	CL10235.Contig1	ATPDR12/PDR12 [Arabidopsis lyrata subsp. lyrata] >gi|297338713|gb|EFH69130.1| ATPDR12/PDR12 [Arabidopsis lyrata subsp. lyrata]	ABC transporter G family member 40 OS=Arabidopsis thaliana GN=ABCG40 PE=1 SV=1	--	11.7054	12.5244	Up
	CL8235.Contig2	PREDICTED: pleiotropic drug resistance protein 3-like [Vitis vinifera]	ABC transporter G family member 37 OS=Arabidopsis thaliana GN=ABCG37 PE=2 SV=1	histone arginine demethylase JMJD6 [EC:1.14.11.-]	3.2451	3.427	Up
	Unigene16570	PREDICTED: pleiotropic drug resistance protein 3-like [Fragaria vesca subsp. vesca]	ABC transporter G family member 35 OS=Arabidopsis thaliana GN=ABCG35 PE=2 SV=1	ATP-binding cassette, subfamily G (WHITE), member 2	0.3033	0.3103	Up
	Unigene9781	PREDICTED: ABC transporter G family member 31-like [Cucumis sativus]	ABC transporter G family member 31 OS=Arabidopsis thaliana GN=ABCG31 PE=2 SV=1	--	2.8958	2.9626	Up
	Unigene13147	PREDICTED: ABC transporter G family member 1-like [Solanum lycopersicum]	ABC transporter G family member 1 OS=Arabidopsis thaliana GN=ABCG1 PE=2 SV=1	U4/U6 small nuclear ribonucleoprotein PRP3	3.301	3.3771	Up
	Unigene13977	PREDICTED: ABC transporter G family member 34-like [Solanum lycopersicum]	ABC transporter G family member 39 OS=Arabidopsis thaliana GN=ABCG39 PE=3 SV=1	--	4.5362	4.6407	Up
	CL2797.Contig2	PREDICTED: ABC transporter G family member 3 [Vitis vinifera] >gi|297734935|emb|CBI17169.3| unnamed protein product [Vitis vinifera]	ABC transporter G family member 3 OS=Arabidopsis thaliana GN=ABCG3 PE=1 SV=2	--	3.5211	3.6022	Up
	Unigene9608	PREDICTED: ABC transporter G family member 11-like [Cucumis sativus] >gi|449524820|ref|XP_004169419.1| PREDICTED: ABC transporter G family member 11-like [Cucumis sativus]	ABC transporter G family member 11 OS=Arabidopsis thaliana GN=ABCG11 PE=1 SV=1	--	2.4271	2.483	Up
	CL4562.Contig6	PREDICTED: ABC transporter G family member 28-like isoform 1 [Vitis vinifera]	ABC transporter G family member 24 OS=Arabidopsis thaliana GN=ABCG24 PE=1 SV=2	ATP-binding cassette, subfamily G (WHITE), member 2	2.4643	2.4815	Up
	CL6349.Contig5	PREDICTED: pleiotropic drug resistance protein 3-like [Fragaria vesca subsp. vesca]	ABC transporter G family member 37 OS=Arabidopsis thaliana GN=ABCG37 PE=2 SV=1	ATP-binding cassette, subfamily G (WHITE), member 2	1.9888	1.9913	Up
	Unigene2206	PREDICTED: ABC transporter G family member 32-like [Solanum lycopersicum]	ABC transporter G family member 32 OS=Arabidopsis thaliana GN=ABCG32 PE=1 SV=1	cell division protease FtsH [EC:3.4.24.-]	8.6386	8.4204	Down
	Unigene23364	PREDICTED: ABC transporter G family member 2-like [Fragaria vesca subsp. vesca]	ABC transporter G family member 6 OS=Arabidopsis thaliana GN=ABCG6 PE=2 SV=1	U4/U6 small nuclear ribonucleoprotein PRP3	5.1582	4.9993	Down
	CL1287.Contig2	PREDICTED: HIV Tat-specific factor 1 homolog [Glycine max]	ABC transporter G family member 22 OS=Arabidopsis thaliana GN=ABCG22 PE=1 SV=1	HIV Tat-specific factor 1	7.8988	7.644	Down
	Unigene23821	predicted protein [Populus trichocarpa] >gi|222866393|gb|EEF03524.1| predicted protein [Populus trichocarpa]	ABC transporter G family member 32 OS=Arabidopsis thaliana GN=ABCG32 PE=1 SV=1	--	3.1963	3.0776	Down
	CL342.Contig2	PREDICTED: ABC transporter G family member 11 [Vitis vinifera] >gi|297737190|emb|CBI26391.3| unnamed protein product [Vitis vinifera]	ABC transporter G family member 11 OS=Arabidopsis thaliana GN=ABCG11 PE=1 SV=1	--	4.1841	3.9297	Down
	Unigene30955	PREDICTED: ABC transporter G family member 11 [Vitis vinifera] >gi|297737190|emb|CBI26391.3| unnamed protein product [Vitis vinifera]	ABC transporter G family member 11 OS=Arabidopsis thaliana GN=ABCG11 PE=1 SV=1	--	3.8963	3.6317	Down
	CL4562.Contig4	unnamed protein product [Vitis vinifera]	ABC transporter G family member 28 OS=Arabidopsis thaliana GN=ABCG28 PE=3 SV=1	--	8.3721	7.7864	Down
	CL2713.Contig2	unnamed protein product [Vitis vinifera]	ABC transporter G family member 28 OS=Arabidopsis thaliana GN=ABCG28 PE=3 SV=1	--	2.5926	2.4112	Down
	Unigene527	ATP-binding cassette transporter, putative [Ricinus communis] >gi|223535665|gb|EEF37331.1| ATP-binding cassette transporter, putative [Ricinus communis]	ABC transporter G family member 20 OS=Arabidopsis thaliana GN=ABCG20 PE=2 SV=1	U4/U6 small nuclear ribonucleoprotein PRP3	5.1763	4.8079	Down
	CL2527.Contig3	PREDICTED: uncharacterized protein LOC100241830 [Vitis vinifera] >gi|297744037|emb|CBI37007.3| unnamed protein product [Vitis vinifera]	ABC transporter G family member 31 OS=Arabidopsis thaliana GN=ABCG31 PE=2 SV=1	--	2.114	1.9389	Down
	CL11474.Contig2	PREDICTED: LOW QUALITY PROTEIN: ABC transporter G family member 32-like [Cucumis sativus]	ABC transporter G family member 32 OS=Arabidopsis thaliana GN=ABCG32 PE=1 SV=1	ATP-binding cassette, subfamily G (WHITE), member 2	13.7859	12.5924	Down
	CL2980.Contig8	PREDICTED: pleiotropic drug resistance protein 3-like [Fragaria vesca subsp. vesca]	ABC transporter G family member 37 OS=Arabidopsis thaliana GN=ABCG37 PE=2 SV=1	ATP-binding cassette, subfamily G (WHITE), member 2	3.4064	3.0977	Down
	CL2797.Contig4	PREDICTED: ABC transporter G family member 3 [Vitis vinifera] >gi|297734935|emb|CBI17169.3| unnamed protein product [Vitis vinifera]	ABC transporter G family member 3 OS=Arabidopsis thaliana GN=ABCG3 PE=1 SV=2	long-chain acyl-CoA synthetase [EC:6.2.1.3]	0.6203	0.564	Down
	Unigene6377	ATP Binding Cassette Transporter (CrWBC1) [Catharanthus roseus]	ABC transporter G family member 5 OS=Arabidopsis thaliana GN=ABCG5 PE=2 SV=1	U4/U6 small nuclear ribonucleoprotein PRP3	4.4489	4.016	Down
	Unigene30430	PREDICTED: ABC transporter G family member 14-like [Vitis vinifera] >gi|296085456|emb|CBI29188.3| unnamed protein product [Vitis vinifera]	ABC transporter G family member 14 OS=Arabidopsis thaliana GN=ABCG14 PE=2 SV=1	ATP-binding cassette, subfamily G (WHITE), member 2	3.5337	3.1898	Down
	CL45.Contig1	hypothetical protein VITISV_025401 [Vitis vinifera]	ABC transporter G family member 40 OS=Arabidopsis thaliana GN=ABCG40 PE=1 SV=1	ATP-binding cassette, subfamily G (WHITE), member 2	36.3992	32.0212	Down
	CL1287.Contig1	PREDICTED: HIV Tat-specific factor 1 homolog [Glycine max]	ABC transporter G family member 22 OS=Arabidopsis thaliana GN=ABCG22 PE=1 SV=1	HIV Tat-specific factor 1	13.3164	11.2693	Down
	CL4562.Contig7	unnamed protein product [Vitis vinifera]	ABC transporter G family member 24 OS=Arabidopsis thaliana GN=ABCG24 PE=1 SV=2	--	1.7912	1.5138	Down
	Unigene3364	white-brown-complex ABC transporter family [Populus trichocarpa] >gi|222873628|gb|EEF10759.1| white-brown-complex ABC transporter family [Populus trichocarpa]	ABC transporter G family member 11 OS=Arabidopsis thaliana GN=ABCG11 PE=1 SV=1	--	2.803	2.3462	Down
	Unigene27494	PREDICTED: ABC transporter G family member 6-like [Fragaria vesca subsp. vesca]	ABC transporter G family member 1 OS=Arabidopsis thaliana GN=ABCG1 PE=2 SV=1	U4/U6 small nuclear ribonucleoprotein PRP3	6.1544	5.037	Down
	CL9318.Contig1	PREDICTED: ABC transporter G family member 31-like [Solanum lycopersicum]	ABC transporter G family member 31 OS=Arabidopsis thaliana GN=ABCG31 PE=2 SV=1	ATP-binding cassette, subfamily G (WHITE), member 2	1.0034	0.8212	Down
	Unigene21484	PREDICTED: ABC transporter G family member 2-like [Solanum lycopersicum]	ABC transporter G family member 20 OS=Arabidopsis thaliana GN=ABCG20 PE=2 SV=1	U4/U6 small nuclear ribonucleoprotein PRP3	8.2997	6.7639	Down
	CL9492.Contig2	unnamed protein product [Vitis vinifera]	ABC transporter G family member 7 OS=Arabidopsis thaliana GN=ABCG7 PE=1 SV=1	ATP-binding cassette, subfamily G (WHITE), member 2	2.081	1.6752	Down
	CL2797.Contig1	PREDICTED: ABC transporter G family member 3 [Vitis vinifera] >gi|297734935|emb|CBI17169.3| unnamed protein product [Vitis vinifera]	ABC transporter G family member 3 OS=Arabidopsis thaliana GN=ABCG3 PE=1 SV=2	--	2.5452	2.0378	Down
	Unigene11279	PREDICTED: ABC transporter G family member 28-like [Vitis vinifera]	ABC transporter G family member 28 OS=Arabidopsis thaliana GN=ABCG28 PE=3 SV=1	ATP-binding cassette, subfamily G (WHITE), member 2	5.5256	4.3608	Down
	CL2527.Contig4	hypothetical protein MTR_1g086340 [Medicago truncatula] >gi|355480382|gb|AES61585.1| hypothetical protein MTR_1g086340 [Medicago truncatula]	ABC transporter G family member 31 OS=Arabidopsis thaliana GN=ABCG31 PE=2 SV=1	--	5.7697	4.509	Down
	CL4599.Contig5	white-brown-complex ABC transporter family [Populus trichocarpa] >gi|222853241|gb|EEE90788.1| white-brown-complex ABC transporter family [Populus trichocarpa]	ABC transporter G family member 19 OS=Arabidopsis thaliana GN=ABCG19 PE=1 SV=1	U4/U6 small nuclear ribonucleoprotein PRP3	1.2119	0.9299	Down
	Unigene4756	PREDICTED: pleiotropic drug resistance protein 2-like [Solanum lycopersicum]	ABC transporter G family member 34 OS=Arabidopsis thaliana GN=ABCG34 PE=2 SV=1	--	9.1733	7.0385	Down
	CL2980.Contig7	PREDICTED: pleiotropic drug resistance protein 3-like [Fragaria vesca subsp. vesca]	ABC transporter G family member 37 OS=Arabidopsis thaliana GN=ABCG37 PE=2 SV=1	--	0.4987	0.3826	Down
	Unigene12290	PREDICTED: ABC transporter G family member 28-like [Solanum lycopersicum]	ABC transporter G family member 28 OS=Arabidopsis thaliana GN=ABCG28 PE=3 SV=1	ATP-binding cassette, subfamily G (WHITE), member 2	4.5439	3.4311	Down
	Unigene823	PREDICTED: ABC transporter G family member 28-like [Vitis vinifera]	ABC transporter G family member 28 OS=Arabidopsis thaliana GN=ABCG28 PE=3 SV=1	autophagy-related protein 7	4.6876	3.4877	Down
	CL4562.Contig1	PREDICTED: ABC transporter G family member 28-like isoform 1 [Vitis vinifera]	ABC transporter G family member 28 OS=Arabidopsis thaliana GN=ABCG28 PE=3 SV=1	--	2.9258	2.138	Down
	Unigene5579	unnamed protein product [Vitis vinifera]	ABC transporter G family member 32 OS=Arabidopsis thaliana GN=ABCG32 PE=1 SV=1	--	3.5527	2.5656	Down
	CL2713.Contig1	Protein white, putative [Ricinus communis] >gi|223529493|gb|EEF31449.1| Protein white, putative [Ricinus communis]	ABC transporter G family member 28 OS=Arabidopsis thaliana GN=ABCG28 PE=3 SV=1	--	5.0391	3.639	Down
	Unigene31969	ABC transporter G family member 40 [Arabidopsis thaliana] >gi|75336094|sp|Q9M9E1.1|AB40G_ARATH RecName: Full=ABC transporter G family member 40; Short=ABC transporter ABCG.40; Short=AtABCG40; AltName: Full=Pleiotropic drug resistance protein 12 >gi|28144321|tpg|DAA00880.1| TPA_exp: PDR12 ABC transporter [Arabidopsis thaliana] >gi|332191211|gb|AEE29332.1| ABC transporter G family member 40 [Arabid…	ABC transporter G family member 40 OS=Arabidopsis thaliana GN=ABCG40 PE=1 SV=1	--	7.8158	5.5971	Down
	CL342.Contig1	PREDICTED: ABC transporter G family member 11 [Vitis vinifera] >gi|297737190|emb|CBI26391.3| unnamed protein product [Vitis vinifera]	ABC transporter G family member 11 OS=Arabidopsis thaliana GN=ABCG11 PE=1 SV=1	--	1.5998	1.1198	Down
	Unigene24662	ATP-binding cassette transporter, putative [Ricinus communis] >gi|223544874|gb|EEF46389.1| ATP-binding cassette transporter, putative [Ricinus communis]	ABC transporter G family member 29 OS=Arabidopsis thaliana GN=ABCG29 PE=2 SV=2	--	14.2799	9.806	Down
	Unigene10423	PREDICTED: ABC transporter G family member 32-like [Solanum lycopersicum]	ABC transporter G family member 32 OS=Arabidopsis thaliana GN=ABCG32 PE=1 SV=1	ATP-binding cassette, subfamily G (WHITE), member 2	7.157	4.8812	Down
	Unigene20617	PREDICTED: ABC transporter G family member 15-like [Fragaria vesca subsp. vesca]	ABC transporter G family member 12 OS=Arabidopsis thaliana GN=ABCG12 PE=1 SV=1	--	2.7448	1.872	Down
	CL509.Contig1	hypothetical protein PRUPE_ppa001878mg [Prunus persica]	ABC transporter G family member 6 OS=Arabidopsis thaliana GN=ABCG6 PE=2 SV=1	U4/U6 small nuclear ribonucleoprotein PRP3	4.3158	2.8869	Down
	CL4599.Contig2	white-brown-complex ABC transporter family [Populus trichocarpa] >gi|222853241|gb|EEE90788.1| white-brown-complex ABC transporter family [Populus trichocarpa]	ABC transporter G family member 19 OS=Arabidopsis thaliana GN=ABCG19 PE=1 SV=1	U4/U6 small nuclear ribonucleoprotein PRP3	0.426	0.2724	Down
	CL297.Contig3	predicted protein [Populus trichocarpa] >gi|222866393|gb|EEF03524.1| predicted protein [Populus trichocarpa]	ABC transporter G family member 32 OS=Arabidopsis thaliana GN=ABCG32 PE=1 SV=1	--	2.675	1.7104	Down
	CL9318.Contig2	PREDICTED: ABC transporter G family member 31-like [Glycine max]	ABC transporter G family member 31 OS=Arabidopsis thaliana GN=ABCG31 PE=2 SV=1	U4/U6 small nuclear ribonucleoprotein PRP3	5.9388	3.7318	Down
	CL11602.Contig3	unnamed protein product [Vitis vinifera]	ABC transporter G family member 29 OS=Arabidopsis thaliana GN=ABCG29 PE=2 SV=2	U4/U6 small nuclear ribonucleoprotein PRP3	3.1857	1.9941	Down
	Unigene9885	PREDICTED: ABC transporter G family member 3 [Vitis vinifera] >gi|297734935|emb|CBI17169.3| unnamed protein product [Vitis vinifera]	ABC transporter G family member 3 OS=Arabidopsis thaliana GN=ABCG3 PE=1 SV=2	--	6.0565	3.7865	Down
	Unigene8061	unnamed protein product [Vitis vinifera]	ABC transporter G family member 7 OS=Arabidopsis thaliana GN=ABCG7 PE=1 SV=1	U4/U6 small nuclear ribonucleoprotein PRP3	15.4624	9.5377	Down
	CL4599.Contig3	white-brown-complex ABC transporter family [Populus trichocarpa] >gi|222853241|gb|EEE90788.1| white-brown-complex ABC transporter family [Populus trichocarpa]	ABC transporter G family member 19 OS=Arabidopsis thaliana GN=ABCG19 PE=1 SV=1	U4/U6 small nuclear ribonucleoprotein PRP3	0.1866	0.1145	Down
	Unigene25374	ABC transporter [Catharanthus roseus]	ABC transporter G family member 32 OS=Arabidopsis thaliana GN=ABCG32 PE=1 SV=1	--	3.0697	1.861	Down
	CL2527.Contig5	hypothetical protein PRUPE_ppa000248mg [Prunus persica]	ABC transporter G family member 31 OS=Arabidopsis thaliana GN=ABCG31 PE=2 SV=1	--	7.1725	4.2559	Down
	Unigene14877	abc transporter family protein [Arabidopsis lyrata subsp. lyrata] >gi|297327343|gb|EFH57763.1| abc transporter family protein [Arabidopsis lyrata subsp. lyrata]	ABC transporter G family member 20 OS=Arabidopsis thaliana GN=ABCG20 PE=2 SV=1	U4/U6 small nuclear ribonucleoprotein PRP3	4.9116	2.8713	Down
	Unigene32731	PREDICTED: ABC transporter G family member 36-like [Solanum lycopersicum]	ABC transporter G family member 35 OS=Arabidopsis thaliana GN=ABCG35 PE=2 SV=1	--	18.7963	10.9882	Down
	Unigene17299	PREDICTED: ABC transporter G family member 36-like [Solanum lycopersicum]	ABC transporter G family member 35 OS=Arabidopsis thaliana GN=ABCG35 PE=2 SV=1	ATP-binding cassette, subfamily G (WHITE), member 2	10.4454	6.0338	Down
	Unigene491	PREDICTED: ABC transporter G family member 11-like [Vitis vinifera]	ABC transporter G family member 11 OS=Arabidopsis thaliana GN=ABCG11 PE=1 SV=1	--	11.3232	6.4958	Down
	CL9492.Contig1	unnamed protein product [Vitis vinifera]	ABC transporter G family member 7 OS=Arabidopsis thaliana GN=ABCG7 PE=1 SV=1	ATP-binding cassette, subfamily G (WHITE), member 2	1.4678	0.8381	Down
	Unigene5922	PREDICTED: LOW QUALITY PROTEIN: putative white-brown complex homolog protein 30-like [Cucumis sativus]	ABC transporter G family member 28 OS=Arabidopsis thaliana GN=ABCG28 PE=3 SV=1	--	7.1599	3.9764	Down
	Unigene12058	ABC transporter [Diospyros kaki]	ABC transporter G family member 11 OS=Arabidopsis thaliana GN=ABCG11 PE=1 SV=1	U4/U6 small nuclear ribonucleoprotein PRP3	14.2696	7.8206	Down
	Unigene28357	ATP-binding cassette transporter, putative [Ricinus communis] >gi|223529642|gb|EEF31588.1| ATP-binding cassette transporter, putative [Ricinus communis]	ABC transporter G family member 1 OS=Arabidopsis thaliana GN=ABCG1 PE=2 SV=1	U4/U6 small nuclear ribonucleoprotein PRP3	2.7666	1.5095	Down
	Unigene667	PREDICTED: ABC transporter G family member 8-like [Vitis vinifera]	ABC transporter G family member 8 OS=Arabidopsis thaliana GN=ABCG8 PE=2 SV=1	U4/U6 small nuclear ribonucleoprotein PRP3	21.6366	11.7479	Down
	Unigene12162	PREDICTED: ABC transporter G family member 31-like [Solanum lycopersicum]	ABC transporter G family member 31 OS=Arabidopsis thaliana GN=ABCG31 PE=2 SV=1	ATP-binding cassette, subfamily G (WHITE), member 2	7.271	3.8998	Down
	Unigene23113	ABC transporter G family member [Medicago truncatula] >gi|355510920|gb|AES92062.1| ABC transporter G family member [Medicago truncatula]	ABC transporter G family member 43 OS=Arabidopsis thaliana GN=ABCG43 PE=3 SV=1	--	3.198	1.6359	Down
	Unigene23114	predicted protein [Populus trichocarpa] >gi|222843270|gb|EEE80817.1| predicted protein [Populus trichocarpa]	ABC transporter G family member 41 OS=Arabidopsis thaliana GN=ABCG41 PE=2 SV=1	ATP-binding cassette, subfamily G (WHITE), member 2	0.4175	0.2135	Down
	Unigene13019	PREDICTED: ABC transporter G family member 11-like [Vitis vinifera]	ABC transporter G family member 11 OS=Arabidopsis thaliana GN=ABCG11 PE=1 SV=1	ATP-binding cassette, subfamily G (WHITE), member 2	39.1651	19.7331	Down
	Unigene14694	PREDICTED: ABC transporter G family member 25-like [Solanum lycopersicum]	ABC transporter G family member 25 OS=Arabidopsis thaliana GN=ABCG25 PE=2 SV=1	ATP-binding cassette, subfamily G (WHITE), member 2	10.8553	5.4639	Down
	Unigene25373	predicted protein [Populus trichocarpa] >gi|222866393|gb|EEF03524.1| predicted protein [Populus trichocarpa]	ABC transporter G family member 32 OS=Arabidopsis thaliana GN=ABCG32 PE=1 SV=1	--	3.7084	1.8066	Down
	Unigene5708	Protein white, putative [Ricinus communis] >gi|223531115|gb|EEF32964.1| Protein white, putative [Ricinus communis]	ABC transporter G family member 28 OS=Arabidopsis thaliana GN=ABCG28 PE=3 SV=1	--	4.5514	2.1912	Down
	Unigene24208	PREDICTED: ABC transporter G family member 1-like [Solanum lycopersicum]	ABC transporter G family member 18 OS=Arabidopsis thaliana GN=ABCG18 PE=2 SV=1	U4/U6 small nuclear ribonucleoprotein PRP3	4.3084	2.0035	Down
	CL1741.Contig13	hypothetical protein VITISV_012795 [Vitis vinifera]	ABC transporter G family member 3 OS=Arabidopsis thaliana GN=ABCG3 PE=1 SV=2	serine carboxypeptidase 1 [EC:3.4.16.-]	1.3339	0.6065	Down
	Unigene10742	ABC transporter family, pleiotropic drug resistance protein [Populus trichocarpa] >gi|222845498|gb|EEE83045.1| ABC transporter family, pleiotropic drug resistance protein [Populus trichocarpa]	ABC transporter G family member 29 OS=Arabidopsis thaliana GN=ABCG29 PE=2 SV=2	ATP-binding cassette, subfamily G (WHITE), member 2	21.8809	9.5715	Down
	Unigene11055	PREDICTED: ABC transporter G family member 3-like [Fragaria vesca subsp. vesca]	ABC transporter G family member 3 OS=Arabidopsis thaliana GN=ABCG3 PE=1 SV=2	ATP-binding cassette, subfamily G (WHITE), member 2	11.7227	4.9027	Down
	Unigene30313	PREDICTED: ABC transporter G family member 29-like [Vitis vinifera]	ABC transporter G family member 29 OS=Arabidopsis thaliana GN=ABCG29 PE=2 SV=2	ATP-binding cassette, subfamily G (WHITE), member 2	6.9112	2.8724	Down
	Unigene16206	unnamed protein product [Vitis vinifera]	ABC transporter G family member 43 OS=Arabidopsis thaliana GN=ABCG43 PE=3 SV=1	--	5.2246	2.138	Down
	CL6349.Contig1	PREDICTED: pleiotropic drug resistance protein 3-like [Fragaria vesca subsp. vesca]	ABC transporter G family member 37 OS=Arabidopsis thaliana GN=ABCG37 PE=2 SV=1	ATP-binding cassette, subfamily G (WHITE), member 2	1.0931	0.4405	Down
	Unigene24084	ABC transporter G family member [Medicago truncatula] >gi|355524306|gb|AET04760.1| ABC transporter G family member [Medicago truncatula]	ABC transporter G family member 5 OS=Arabidopsis thaliana GN=ABCG5 PE=2 SV=1	U4/U6 small nuclear ribonucleoprotein PRP3	3.8398	1.5371	Down
	Unigene10330	unnamed protein product [Vitis vinifera]	ABC transporter G family member 25 OS=Arabidopsis thaliana GN=ABCG25 PE=2 SV=1	U4/U6 small nuclear ribonucleoprotein PRP3	19.2757	7.6112	Down
	Unigene28802	PREDICTED: ABC transporter G family member 28-like [Cucumis sativus]	ABC transporter G family member 28 OS=Arabidopsis thaliana GN=ABCG28 PE=3 SV=1	--	4.095	1.571	Down
	Unigene8925	predicted protein [Populus trichocarpa] >gi|222843270|gb|EEE80817.1| predicted protein [Populus trichocarpa]	ABC transporter G family member 42 OS=Arabidopsis thaliana GN=ABCG42 PE=2 SV=1	ATP-binding cassette, subfamily G (WHITE), member 2	12.4245	3.9385	Down
	Unigene6658	PREDICTED: ABC transporter G family member 3-like [Glycine max]	ABC transporter G family member 3 OS=Arabidopsis thaliana GN=ABCG3 PE=1 SV=2	ATP-binding cassette, subfamily G (WHITE), member 2	14.4127	4.1148	Down
	CL45.Contig4	ATP-binding cassette transporter, putative [Ricinus communis] >gi|223547739|gb|EEF49231.1| ATP-binding cassette transporter, putative [Ricinus communis]	ABC transporter G family member 40 OS=Arabidopsis thaliana GN=ABCG40 PE=1 SV=1	--	33.5877	8.8226	Down
	CL11602.Contig1	ATP-binding cassette transporter, putative [Ricinus communis] >gi|223544876|gb|EEF46391.1| ATP-binding cassette transporter, putative [Ricinus communis]	ABC transporter G family member 36 OS=Arabidopsis thaliana GN=ABCG36 PE=1 SV=1	ATP-binding cassette, subfamily G (WHITE), member 2	1.1752	0.3006	Down
	Unigene23804	hypothetical protein PRUPE_ppa001878mg [Prunus persica]	ABC transporter G family member 16 OS=Arabidopsis thaliana GN=ABCG16 PE=2 SV=2	U4/U6 small nuclear ribonucleoprotein PRP3	5.8274	1.4453	Down
	Unigene1565	hypothetical protein ARALYDRAFT_906929 [Arabidopsis lyrata subsp. lyrata] >gi|297323858|gb|EFH54279.1| hypothetical protein ARALYDRAFT_906929 [Arabidopsis lyrata subsp. lyrata]	ABC transporter G family member 19 OS=Arabidopsis thaliana GN=ABCG19 PE=1 SV=1	U4/U6 small nuclear ribonucleoprotein PRP3	9.0778	2.0431	Down
	CL6349.Contig2	PREDICTED: pleiotropic drug resistance protein 3-like [Vitis vinifera]	ABC transporter G family member 37 OS=Arabidopsis thaliana GN=ABCG37 PE=2 SV=1	ATP-binding cassette, subfamily G (WHITE), member 2	0.1563	0.032	Down
	Unigene23111	predicted protein [Populus trichocarpa] >gi|222843270|gb|EEE80817.1| predicted protein [Populus trichocarpa]	ABC transporter G family member 37 OS=Arabidopsis thaliana GN=ABCG37 PE=2 SV=1	ATP-binding cassette, subfamily G (WHITE), member 2	3.4618	0.6159	Down
	Unigene19775	white-brown-complex ABC transporter family [Populus trichocarpa] >gi|222867394|gb|EEF04525.1| white-brown-complex ABC transporter family [Populus trichocarpa]	ABC transporter G family member 22 OS=Arabidopsis thaliana GN=ABCG22 PE=1 SV=1	ATP-binding cassette, subfamily G (WHITE), member 2	9.1962	1.5256	Down
	Unigene28180	hypothetical protein VITISV_020606 [Vitis vinifera]	ABC transporter G family member 37 OS=Arabidopsis thaliana GN=ABCG37 PE=2 SV=1	--	3.4879	0.5097	Down
	Unigene26073	unnamed protein product [Vitis vinifera]	ABC transporter G family member 27 OS=Arabidopsis thaliana GN=ABCG27 PE=2 SV=1	ATP-binding cassette, subfamily G (WHITE), member 2	13.0831	1.7014	Down
	Unigene15261	PREDICTED: ABC transporter G family member 14-like [Vitis vinifera] >gi|296085456|emb|CBI29188.3| unnamed protein product [Vitis vinifera]	ABC transporter G family member 14 OS=Arabidopsis thaliana GN=ABCG14 PE=2 SV=1	ATP-binding cassette, subfamily G (WHITE), member 2	132.148	13.5968	Down
	CL2980.Contig5	PREDICTED: pleiotropic drug resistance protein 3-like [Fragaria vesca subsp. vesca]	ABC transporter G family member 37 OS=Arabidopsis thaliana GN=ABCG37 PE=2 SV=1	ATP-binding cassette, subfamily G (WHITE), member 2	0.1674	0	Down
	Unigene23112	PREDICTED: pleiotropic drug resistance protein 3-like [Vitis vinifera]	ABC transporter G family member 37 OS=Arabidopsis thaliana GN=ABCG37 PE=2 SV=1	ATP-binding cassette, subfamily G (WHITE), member 2	1.4434	0	Down
Unknown	Unigene16403	PREDICTED: putative disease resistance protein RGA1-like [Solanum lycopersicum]	Disease resistance protein RGA2 OS=Solanum bulbocastanum GN=RGA2 PE=1 SV=1	DNA-directed RNA polymerases I, II, and III subunit RPABC1	2.2209	11.1784	Down
	Unigene31806	PREDICTED: putative disease resistance protein RGA3-like [Vitis vinifera]	Disease resistance protein RGA2 OS=Solanum bulbocastanum GN=RGA2 PE=1 SV=1	DNA-directed RNA polymerases I, II, and III subunit RPABC1	1.7319	6.1208	Down
	Unigene34953	PREDICTED: putative disease resistance protein RGA4 [Vitis vinifera]	Disease resistance protein RGA2 OS=Solanum bulbocastanum GN=RGA2 PE=1 SV=1	DNA-directed RNA polymerases I, II, and III subunit RPABC1	0.9485	3.1538	Down
	Unigene9761	PREDICTED: putative disease resistance protein RGA3-like [Vitis vinifera]	Disease resistance protein RGA2 OS=Solanum bulbocastanum GN=RGA2 PE=1 SV=1	DNA-directed RNA polymerases I, II, and III subunit RPABC1	1.9847	5.9067	Down
	CL4937.Contig5	leucine-rich repeat containing protein, putative [Ricinus communis] >gi|223530909|gb|EEF32769.1| leucine-rich repeat containing protein, putative [Ricinus communis]	Disease resistance protein RGA2 OS=Solanum bulbocastanum GN=RGA2 PE=1 SV=1	DNA-directed RNA polymerases I, II, and III subunit RPABC1	0.3097	0.9133	Down
	CL4937.Contig4	leucine-rich repeat containing protein, putative [Ricinus communis] >gi|223530909|gb|EEF32769.1| leucine-rich repeat containing protein, putative [Ricinus communis]	Disease resistance protein RGA2 OS=Solanum bulbocastanum GN=RGA2 PE=1 SV=1	DNA-directed RNA polymerases I, II, and III subunit RPABC1	0.3523	0.811	Down
	Unigene7236	hypothetical protein PRUPE_ppa022038mg [Prunus persica]	Disease resistance protein RGA2 OS=Solanum bulbocastanum GN=RGA2 PE=1 SV=1	DNA-directed RNA polymerases I, II, and III subunit RPABC1	2.2116	4.2641	Down
	Unigene31287	predicted protein [Populus trichocarpa] >gi|222862302|gb|EEE99808.1| predicted protein [Populus trichocarpa]	Disease resistance protein RGA2 OS=Solanum bulbocastanum GN=RGA2 PE=1 SV=1	DNA-directed RNA polymerases I, II, and III subunit RPABC1	2.0999	3.5805	Down
	CL1490.Contig3	RecName: Full=Pleiotropic drug resistance protein 1; AltName: Full=NtPDR1 >gi|41052472|dbj|BAD07483.1| PDR-type ABC transporter 1 [Nicotiana tabacum]	Pleiotropic drug resistance protein 1 OS=Nicotiana tabacum GN=PDR1 PE=2 SV=1	--	6.6715	11.0199	Down
	Unigene5268	PREDICTED: protein TRIGALACTOSYLDIACYLGLYCEROL 3, chloroplastic-like [Fragaria vesca subsp. vesca]	--	putative ABC transport system ATP-binding protein	5.4044	8.2934	Down
	Unigene13745	aldose reductase with ABC domain [Populus trichocarpa] >gi|222867551|gb|EEF04682.1| aldose reductase with ABC domain [Populus trichocarpa]	Aldo-keto reductase family 4 member C10 OS=Arabidopsis thaliana GN=AKR4C10 PE=1 SV=1	aldehyde reductase [EC:1.1.1.21]	6.8057	10.0192	Down
	CL2938.Contig1	RecName: Full=Pleiotropic drug resistance protein 3; AltName: Full=NtPDR3 >gi|55056942|emb|CAH39853.1| PDR-like ABC transporter [Nicotiana tabacum]	Pleiotropic drug resistance protein 3 OS=Nicotiana tabacum GN=PDR3 PE=2 SV=1	exportin-T	8.8699	12.8336	Down
	CL2938.Contig3	RecName: Full=Pleiotropic drug resistance protein 3; AltName: Full=NtPDR3 >gi|55056942|emb|CAH39853.1| PDR-like ABC transporter [Nicotiana tabacum]	Pleiotropic drug resistance protein 3 OS=Nicotiana tabacum GN=PDR3 PE=2 SV=1	exportin-T	10.8725	15.422	Down
	Unigene13504	PREDICTED: disease resistance RPP13-like protein 4-like [Solanum lycopersicum]	Disease resistance RPP13-like protein 4 OS=Arabidopsis thaliana GN=RPP13L4 PE=2 SV=2	DNA-directed RNA polymerases I, II, and III subunit RPABC1	13.8628	19.5112	Down
	Unigene1974	predicted protein [Populus trichocarpa] >gi|222853592|gb|EEE91139.1| predicted protein [Populus trichocarpa]	--	DNA-directed RNA polymerases I, II, and III subunit RPABC1	2.1326	2.8893	Down
	Unigene10012	PREDICTED: putative disease resistance protein RGA4-like [Vitis vinifera]	Disease resistance protein RGA2 OS=Solanum bulbocastanum GN=RGA2 PE=1 SV=1	DNA-directed RNA polymerases I, II, and III subunit RPABC1	32.9294	44.0478	Down
	CL6508.Contig1	PREDICTED: putative ABC1 protein At2g40090-like [Solanum lycopersicum]	Uncharacterized aarF domain-containing protein kinase At1g79600, chloroplastic OS=Arabidopsis thaliana GN=At1g79600 PE=1 SV=1	aarF domain-containing kinase	8.2951	11.0419	Down
	CL5946.Contig4	hypothetical protein PRUPE_ppa010102mg [Prunus persica]	Protein ALUMINUM SENSITIVE 3 OS=Arabidopsis thaliana GN=ALS3 PE=1 SV=1	putative ABC transport system permease protein	8.7834	11.5841	Down
	CL10813.Contig9	ABCG subfamily transporter protein [Solanum tuberosum]	Pleiotropic drug resistance protein 3 OS=Nicotiana tabacum GN=PDR3 PE=2 SV=1	glucose-1-phosphate adenylyltransferase [EC:2.7.7.27]	3.972	5.2013	Down
	CL10813.Contig10	ABCG subfamily transporter protein [Solanum tuberosum]	Pleiotropic drug resistance protein 3 OS=Nicotiana tabacum GN=PDR3 PE=2 SV=1	cyclopropane-fatty-acyl-phospholipid synthase [EC:2.1.1.79]	3.6962	4.7932	Down
	CL10813.Contig16	RecName: Full=Pleiotropic drug resistance protein 3; AltName: Full=NtPDR3 >gi|55056942|emb|CAH39853.1| PDR-like ABC transporter [Nicotiana tabacum]	Pleiotropic drug resistance protein 3 OS=Nicotiana tabacum GN=PDR3 PE=2 SV=1	glucose-1-phosphate adenylyltransferase [EC:2.7.7.27]	6.3428	8.134	Down
	CL10813.Contig8	RecName: Full=Pleiotropic drug resistance protein 3; AltName: Full=NtPDR3 >gi|55056942|emb|CAH39853.1| PDR-like ABC transporter [Nicotiana tabacum]	Pleiotropic drug resistance protein 3 OS=Nicotiana tabacum GN=PDR3 PE=2 SV=1	glucose-1-phosphate adenylyltransferase [EC:2.7.7.27]	2.9719	3.8111	Down
	Unigene673	PREDICTED: TMV resistance protein N-like [Glycine max]	Protein SUPPRESSOR OF npr1-1, CONSTITUTIVE 1 OS=Arabidopsis thaliana GN=SNC1 PE=1 SV=3	DNA-directed RNA polymerases I, II, and III subunit RPABC1	2.9161	3.6717	Down
	CL10813.Contig2	RecName: Full=Pleiotropic drug resistance protein 3; AltName: Full=NtPDR3 >gi|55056942|emb|CAH39853.1| PDR-like ABC transporter [Nicotiana tabacum]	Pleiotropic drug resistance protein 3 OS=Nicotiana tabacum GN=PDR3 PE=2 SV=1	glucose-1-phosphate adenylyltransferase [EC:2.7.7.27]	3.2869	4.0896	Down
	CL5127.Contig1	auxin response factor 2 [Solanum lycopersicum] >gi|85069279|gb|ABC69711.1| auxin response factor 2 [Solanum lycopersicum]	Auxin response factor 2 OS=Arabidopsis thaliana GN=ARF2 PE=1 SV=2	auxin response factor	15.5253	19.0795	Down
	Unigene34402	ATP synthase F0 subunit 6 [Oltmannsiellopsis viridis] >gi|86450280|gb|ABC96359.1| ATP synthase F0 subunit 6 (mitochondrion) [Oltmannsiellopsis viridis]	ATP synthase subunit a OS=Marchantia polymorpha GN=ATP6 PE=3 SV=2	F-type H+-transporting ATPase subunit a [EC:3.6.3.14]	2.5042	3.0743	Down
	CL10813.Contig1	RecName: Full=Pleiotropic drug resistance protein 3; AltName: Full=NtPDR3 >gi|55056942|emb|CAH39853.1| PDR-like ABC transporter [Nicotiana tabacum]	Pleiotropic drug resistance protein 3 OS=Nicotiana tabacum GN=PDR3 PE=2 SV=1	--	2.718	3.302	Down
	CL8275.Contig2	PREDICTED: uncharacterized protein LOC101312987 [Fragaria vesca subsp. vesca]	Ras-related protein RABC2a OS=Arabidopsis thaliana GN=RABC2A PE=1 SV=1	Ras-related protein Rab-18	2.0969	2.5238	Down
	CL10813.Contig25	RecName: Full=Pleiotropic drug resistance protein 3; AltName: Full=NtPDR3 >gi|55056942|emb|CAH39853.1| PDR-like ABC transporter [Nicotiana tabacum]	Pleiotropic drug resistance protein 3 OS=Nicotiana tabacum GN=PDR3 PE=2 SV=1	glucose-1-phosphate adenylyltransferase [EC:2.7.7.27]	4.0495	4.7776	Down
	Unigene8165	unnamed protein product [Vitis vinifera]	Disease resistance protein RGA2 OS=Solanum bulbocastanum GN=RGA2 PE=1 SV=1	DNA-directed RNA polymerases I, II, and III subunit RPABC1	4.5821	5.3952	Down
	CL10813.Contig4	RecName: Full=Pleiotropic drug resistance protein 3; AltName: Full=NtPDR3 >gi|55056942|emb|CAH39853.1| PDR-like ABC transporter [Nicotiana tabacum]	Pleiotropic drug resistance protein 3 OS=Nicotiana tabacum GN=PDR3 PE=2 SV=1	glucose-1-phosphate adenylyltransferase [EC:2.7.7.27]	6.7254	7.9165	Down
	CL10813.Contig12	RecName: Full=Pleiotropic drug resistance protein 3; AltName: Full=NtPDR3 >gi|55056942|emb|CAH39853.1| PDR-like ABC transporter [Nicotiana tabacum]	Pleiotropic drug resistance protein 3 OS=Nicotiana tabacum GN=PDR3 PE=2 SV=1	glucose-1-phosphate adenylyltransferase [EC:2.7.7.27]	4.0685	4.7283	Down
	CL10813.Contig19	RecName: Full=Pleiotropic drug resistance protein 3; AltName: Full=NtPDR3 >gi|55056942|emb|CAH39853.1| PDR-like ABC transporter [Nicotiana tabacum]	Pleiotropic drug resistance protein 3 OS=Nicotiana tabacum GN=PDR3 PE=2 SV=1	glucose-1-phosphate adenylyltransferase [EC:2.7.7.27]	4.0753	4.7362	Down
	CL10813.Contig21	RecName: Full=Pleiotropic drug resistance protein 3; AltName: Full=NtPDR3 >gi|55056942|emb|CAH39853.1| PDR-like ABC transporter [Nicotiana tabacum]	Pleiotropic drug resistance protein 3 OS=Nicotiana tabacum GN=PDR3 PE=2 SV=1	glucose-1-phosphate adenylyltransferase [EC:2.7.7.27]	4.1263	4.7954	Down
	CL5138.Contig2	PREDICTED: protein TRIGALACTOSYLDIACYLGLYCEROL 3, chloroplastic-like [Vitis vinifera]	Protein TRIGALACTOSYLDIACYLGLYCEROL 3, chloroplastic OS=Arabidopsis thaliana GN=TGD3 PE=1 SV=1	putative ABC transport system ATP-binding protein	10.9528	12.6261	Down
	CL10813.Contig17	ABCG subfamily transporter protein [Solanum tuberosum]	Pleiotropic drug resistance protein 3 OS=Nicotiana tabacum GN=PDR3 PE=2 SV=1	glucose-1-phosphate adenylyltransferase [EC:2.7.7.27]	5.2686	5.8666	Down
	CL284.Contig2	PREDICTED: UPF0051 protein ABCI8, chloroplastic [Vitis vinifera]	UPF0051 protein ABCI8, chloroplastic OS=Arabidopsis thaliana GN=ABCI8 PE=2 SV=1		23.1943	25.6269	Down
	Unigene4787	ABC transporter [Diospyros kaki]	--	--	3.5781	3.9496	Down
	CL5946.Contig2	hypothetical protein PRUPE_ppa010102mg [Prunus persica]	Protein ALUMINUM SENSITIVE 3 OS=Arabidopsis thaliana GN=ALS3 PE=1 SV=1	putative ABC transport system permease protein	8.426	9.1522	Down
	CL284.Contig1	PREDICTED: UPF0051 protein ABCI8, chloroplastic [Vitis vinifera]	UPF0051 protein ABCI8, chloroplastic OS=Arabidopsis thaliana GN=ABCI8 PE=2 SV=1		27.6435	28.5849	Down
	CL1273.Contig2	ATP-binding cassette transporter, putative [Ricinus communis] >gi|223545504|gb|EEF47009.1| ATP-binding cassette transporter, putative [Ricinus communis]	Pleiotropic drug resistance protein 6 OS=Oryza sativa subsp. japonica GN=PDR6 PE=2 SV=3	--	0.8212	0.8401	Down
	Unigene4709	ABCG subfamily transporter protein [Solanum tuberosum]	Pleiotropic drug resistance protein 3 OS=Nicotiana tabacum GN=PDR3 PE=2 SV=1	cyclopropane-fatty-acyl-phospholipid synthase [EC:2.1.1.79]	4.4725	4.5294	Down
	CL5946.Contig3	hypothetical protein PRUPE_ppa010102mg [Prunus persica]	Protein ALUMINUM SENSITIVE 3 OS=Arabidopsis thaliana GN=ALS3 PE=1 SV=1	putative ABC transport system permease protein	11.6474	11.346	Down
	Unigene5005	PREDICTED: probable disease resistance protein At4g33300-like [Solanum lycopersicum]	Probable disease resistance protein At4g33300 OS=Arabidopsis thaliana GN=At4g33300 PE=2 SV=3	DNA-directed RNA polymerases I, II, and III subunit RPABC1	8.8189	8.5039	Down
	Unigene19926	ABC transporter family protein [Populus trichocarpa] >gi|222843764|gb|EEE81311.1| ABC transporter family protein [Populus trichocarpa]	Uncharacterized protein At1g03900 OS=Arabidopsis thaliana GN=At1g03900 PE=2 SV=1	--	6.6343	6.3024	Down
	Unigene13868	PREDICTED: ABC transporter I family member 6, chloroplastic-like [Solanum lycopersicum]	ABC transporter I family member 6, chloroplastic OS=Arabidopsis thaliana GN=ABCI6 PE=1 SV=1	Fe-S cluster assembly ATP-binding protein	50.9419	48.1067	Down
	Unigene17543	unnamed protein product [Vitis vinifera]	Disease resistance protein RGA2 OS=Solanum bulbocastanum GN=RGA2 PE=1 SV=1	DNA-directed RNA polymerases I, II, and III subunit RPABC1	4.9703	4.6329	Down
	Unigene16755	PREDICTED: protein TRIGALACTOSYLDIACYLGLYCEROL 1, chloroplastic-like [Solanum lycopersicum]	Protein TRIGALACTOSYLDIACYLGLYCEROL 1, chloroplastic OS=Arabidopsis thaliana GN=TGD1 PE=1 SV=1	putative ABC transport system permease protein	7.3037	6.7927	Down
	CL7287.Contig2	hypothetical protein PRUPE_ppa010980mg [Prunus persica]	--	DNA-directed RNA polymerases I, II, and III subunit RPABC1	1.7905	1.6422	Down
	Unigene3597	PREDICTED: protein ABCI7, chloroplastic-like [Solanum lycopersicum]	Protein ABCI7, chloroplastic OS=Arabidopsis thaliana GN=ABCI7 PE=1 SV=1	Fe-S cluster assembly protein SufD	12.9815	11.8655	Down
	Unigene15249	PREDICTED: putative disease resistance protein RGA1-like [Fragaria vesca subsp. vesca]	Disease resistance protein RGA2 OS=Solanum bulbocastanum GN=RGA2 PE=1 SV=1	DNA-directed RNA polymerases I, II, and III subunit RPABC1	6.2609	5.6516	Down
	Unigene19489	PREDICTED: putative disease resistance protein RGA4-like [Fragaria vesca subsp. vesca]	Disease resistance protein RGA2 OS=Solanum bulbocastanum GN=RGA2 PE=1 SV=1	DNA-directed RNA polymerases I, II, and III subunit RPABC1	8.1679	7.3228	Down
	CL6897.Contig1	PREDICTED: DUF246 domain-containing protein At1g04910 [Vitis vinifera] >gi|296081371|emb|CBI16804.3| unnamed protein product [Vitis vinifera]	Uncharacterized protein At1g04910 OS=Arabidopsis thaliana GN=At1g04910 PE=1 SV=1	DNA-directed RNA polymerases I, II, and III subunit RPABC1	4.25	3.7992	Down
	Unigene23295	PREDICTED: disease resistance protein RGA2-like [Vitis vinifera]	Disease resistance protein RGA2 OS=Solanum bulbocastanum GN=RGA2 PE=1 SV=1	DNA-directed RNA polymerases I, II, and III subunit RPABC1	2.7774	2.4661	Down
	Unigene12333	abc transporter, putative [Ricinus communis] >gi|223537089|gb|EEF38723.1| abc transporter, putative [Ricinus communis]	ABC transporter I family member 6, chloroplastic OS=Arabidopsis thaliana GN=ABCI6 PE=1 SV=1	Fe-S cluster assembly ATP-binding protein	23.4677	20.7752	Down
	CL6508.Contig2	PREDICTED: putative ABC1 protein At2g40090-like [Cucumis sativus]	Putative ABC1 protein At2g40090 OS=Arabidopsis thaliana GN=At2g40090 PE=2 SV=2	aarF domain-containing kinase	1.5062	1.3208	Down
	Unigene16238	hypothetical protein PRUPE_ppa007146mg [Prunus persica]	Protein ABCI12, chloroplastic OS=Arabidopsis thaliana GN=ABCI12 PE=1 SV=1	general transcription factor 3C polypeptide 2	3.035	2.6613	Down
	CL11702.Contig2	predicted protein [Populus trichocarpa] >gi|222860317|gb|EEE97864.1| predicted protein [Populus trichocarpa]	Disease resistance RPP13-like protein 4 OS=Arabidopsis thaliana GN=RPP13L4 PE=2 SV=2	DNA-directed RNA polymerases I, II, and III subunit RPABC1	32.3638	28.2853	Down
	Unigene1372	unnamed protein product [Vitis vinifera]	ABC transporter I family member 10, chloroplastic OS=Arabidopsis thaliana GN=ABCI10 PE=1 SV=1	putative ABC transport system ATP-binding protein	4.8015	4.1753	Down
	Unigene18821	PREDICTED: protein ABCI7, chloroplastic-like [Solanum lycopersicum]	Protein ABCI7, chloroplastic OS=Arabidopsis thaliana GN=ABCI7 PE=1 SV=1	Fe-S cluster assembly protein SufD	17.8521	15.4865	Down
	CL3538.Contig3	ABC transporter family protein [Populus trichocarpa] >gi|222865986|gb|EEF03117.1| ABC transporter family protein [Populus trichocarpa]	ABC transporter I family member 1 OS=Arabidopsis thaliana GN=ABCI1 PE=2 SV=1	--	1.2911	1.1007	Down
	CL7287.Contig1	hypothetical protein PRUPE_ppa010980mg [Prunus persica]	--	DNA-directed RNA polymerases I, II, and III subunit RPABC1	2.4969	2.1183	Down
	Unigene3737	PREDICTED: ABC transporter I family member 1-like isoform 1 [Solanum lycopersicum] >gi|460412755|ref|XP_004251763.1| PREDICTED: ABC transporter I family member 1-like isoform 2 [Solanum lycopersicum]	ABC transporter I family member 1 OS=Arabidopsis thaliana GN=ABCI1 PE=2 SV=1	--	16.7478	14.1796	Down
	CL8189.Contig2	ATP-binding cassette transporter, putative [Ricinus communis] >gi|223546806|gb|EEF48304.1| ATP-binding cassette transporter, putative [Ricinus communis]	Pleiotropic drug resistance protein 1 OS=Nicotiana tabacum GN=PDR1 PE=2 SV=1	tyrosine decarboxylase [EC:4.1.1.25]	9.9262	8.3629	Down
	CL9326.Contig1	DNA-directed RNA polymerase IIa [Nicotiana tabacum] >gi|4960152|gb|AAD34614.1|AF153278_1 DNA-directed RNA polymerase IIb [Nicotiana tabacum]	--	DNA-directed RNA polymerases I, II, and III subunit RPABC2	164.175	136.236	Down
	CL7406.Contig1	EIN3-binding F-box protein 1 [Solanum lycopersicum] >gi|82734614|gb|ABB89717.1| EIN3-binding F-box protein 1 [Solanum lycopersicum] >gi|83584402|gb|ABC24971.1| EIN3-binding F-box protein 1 [Solanum lycopersicum] >gi|240017777|gb|ACS44350.1| EIN3-binding F-box protein 2 [Solanum lycopersicum]	EIN3-binding F-box protein 1 OS=Arabidopsis thaliana GN=EBF1 PE=1 SV=1	EIN3-binding F-box protein	11.2419	9.3018	Down
	Unigene4506	hypothetical protein PRUPE_ppa026844mg [Prunus persica]	Disease resistance protein RGA2 OS=Solanum bulbocastanum GN=RGA2 PE=1 SV=1	DNA-directed RNA polymerases I, II, and III subunit RPABC1	7.3626	6.0714	Down
	CL3981.Contig2	ABC transporter family protein [Populus trichocarpa] >gi|222856309|gb|EEE93856.1| ABC transporter family protein [Populus trichocarpa]	Uncharacterized protein At1g03900 OS=Arabidopsis thaliana GN=At1g03900 PE=2 SV=1	--	21.7312	17.846	Down
	Unigene18253	predicted protein [Populus trichocarpa] >gi|224071453|ref|XP_002303467.1| predicted protein [Populus trichocarpa] >gi|118486243|gb|ABK94963.1| unknown [Populus trichocarpa] >gi|222833504|gb|EEE71981.1| predicted protein [Populus trichocarpa] >gi|222840899|gb|EEE78446.1| predicted protein [Populus trichocarpa]	DNA-directed RNA polymerases I, II, and III subunit RPABC5 OS=Brassica napus PE=3 SV=1	DNA-directed RNA polymerases I, II, and III subunit RPABC5	31.2579	25.5372	Down
	CL9462.Contig1	PREDICTED: ABC transporter I family member 11, chloroplastic-like [Solanum lycopersicum]	ABC transporter I family member 11, chloroplastic OS=Arabidopsis thaliana GN=ABCI11 PE=2 SV=1	putative ABC transport system ATP-binding protein	9.2868	7.5214	Down
	CL4437.Contig2	PREDICTED: DNA-directed RNA polymerases I, II, and III subunit RPABC4-like [Vitis vinifera] >gi|225468167|ref|XP_002272054.1| PREDICTED: DNA-directed RNA polymerases I, II, and III subunit RPABC4 [Vitis vinifera] >gi|297738145|emb|CBI27346.3| unnamed protein product [Vitis vinifera]	--	DNA-directed RNA polymerases I, II, and III subunit RPABC4	77.1817	62.2783	Down
	CL11702.Contig1	hypothetical protein PRUPE_ppa019132mg [Prunus persica]	Disease resistance RPP13-like protein 4 OS=Arabidopsis thaliana GN=RPP13L4 PE=2 SV=2	DNA-directed RNA polymerases I, II, and III subunit RPABC1	37.2865	30.0772	Down
	Unigene20756	NBS/LRR resistance protein-like protein [Theobroma cacao]	Disease resistance protein RGA2 OS=Solanum bulbocastanum GN=RGA2 PE=1 SV=1	DNA-directed RNA polymerases I, II, and III subunit RPABC1	5.9546	4.7747	Down
	Unigene18846	PREDICTED: DNA-directed RNA polymerases I, II, and III subunit RPABC1 isoform 1 [Vitis vinifera] >gi|225445172|ref|XP_002284110.1| PREDICTED: DNA-directed RNA polymerases I, II, and III subunit RPABC1 isoform 2 [Vitis vinifera]	--	DNA-directed RNA polymerases I, II, and III subunit RPABC1	66.0693	52.129	Down
	CL1973.Contig1	hypothetical protein VITISV_040623 [Vitis vinifera]	ABC transporter I family member 20 OS=Arabidopsis thaliana GN=ABCI20 PE=2 SV=1	CCR4-NOT complex subunit CAF16	9.4463	7.4295	Down
	CL8275.Contig1	predicted protein [Populus trichocarpa] >gi|118482557|gb|ABK93199.1| unknown [Populus trichocarpa] >gi|222865441|gb|EEF02572.1| predicted protein [Populus trichocarpa]	Ras-related protein RABC2a OS=Arabidopsis thaliana GN=RABC2A PE=1 SV=1	Ras-related protein Rab-18	2.2243	1.7338	Down
	CL8791.Contig2	PREDICTED: DNA-directed RNA polymerases I, II, and III subunit rpabc3 isoform 1 [Vitis vinifera] >gi|359478220|ref|XP_003632088.1| PREDICTED: DNA-directed RNA polymerases I, II, and III subunit rpabc3 isoform 2 [Vitis vinifera] >gi|296084252|emb|CBI24640.3| unnamed protein product [Vitis vinifera]	--	DNA-directed RNA polymerases I, II, and III subunit RPABC3	5.7386	4.4638	Down
	CL8275.Contig4	predicted protein [Populus trichocarpa] >gi|118482557|gb|ABK93199.1| unknown [Populus trichocarpa] >gi|222865441|gb|EEF02572.1| predicted protein [Populus trichocarpa]	Ras-related protein RABC2a OS=Arabidopsis thaliana GN=RABC2A PE=1 SV=1	Ras-related protein Rab-18	5.9823	4.649	Down
	Unigene21498	ABC transporter-like [Arabidopsis thaliana]	--	--	12.0433	9.3546	Down
	Unigene11177	hypothetical protein PRUPE_ppa024157mg [Prunus persica]	Disease resistance protein RGA2 OS=Solanum bulbocastanum GN=RGA2 PE=1 SV=1	DNA-directed RNA polymerases I, II, and III subunit RPABC1	2.8868	2.215	Down
	Unigene26761	DNA-directed RNA polymerase II, putative [Ricinus communis] >gi|223546721|gb|EEF48219.1| DNA-directed RNA polymerase II, putative [Ricinus communis]	--	DNA-directed RNA polymerases I, II, and III subunit RPABC1	22.4783	16.8049	Down
	Unigene4120	predicted protein [Populus trichocarpa] >gi|222852551|gb|EEE90098.1| predicted protein [Populus trichocarpa]	Protein ABCI12, chloroplastic OS=Arabidopsis thaliana GN=ABCI12 PE=1 SV=1	general transcription factor 3C polypeptide 2	5.6681	4.1964	Down
	Unigene71	PREDICTED: TMV resistance protein N-like [Fragaria vesca subsp. vesca]	TMV resistance protein N OS=Nicotiana glutinosa GN=N PE=1 SV=1	DNA-directed RNA polymerases I, II, and III subunit RPABC1	12.3464	9.1166	Down
	Unigene5582	Multidrug resistance protein ABC transporter family [Medicago truncatula] >gi|355508724|gb|AES89866.1| Multidrug resistance protein ABC transporter family [Medicago truncatula]	Polyubiquitin 9 OS=Arabidopsis thaliana GN=UBQ9 PE=3 SV=1	ubiquitin C	397.745	285.979	Down
	CL8714.Contig2	PREDICTED: DNA-directed RNA polymerases I, II, and III subunit rpabc3-like isoform 1 [Solanum lycopersicum] >gi|460377396|ref|XP_004234479.1| PREDICTED: DNA-directed RNA polymerases I, II, and III subunit rpabc3-like isoform 2 [Solanum lycopersicum]	--	DNA-directed RNA polymerases I, II, and III subunit RPABC3	41.0224	28.9725	Down
	CL5138.Contig1	PREDICTED: protein TRIGALACTOSYLDIACYLGLYCEROL 3, chloroplastic-like [Solanum lycopersicum]	Protein TRIGALACTOSYLDIACYLGLYCEROL 3, chloroplastic OS=Arabidopsis thaliana GN=TGD3 PE=1 SV=1	putative ABC transport system ATP-binding protein	13.2268	9.2494	Down
	Unigene33113	PREDICTED: ABC transporter G family member 32-like [Solanum lycopersicum]	Pleiotropic drug resistance protein 6 OS=Oryza sativa subsp. japonica GN=PDR6 PE=2 SV=3	--	3.7434	2.6042	Down
	Unigene10078	unnamed protein product [Vitis vinifera]	Protein TRIGALACTOSYLDIACYLGLYCEROL 1, chloroplastic OS=Arabidopsis thaliana GN=TGD1 PE=1 SV=1	putative ABC transport system permease protein	18.857	13.0447	Down
	Unigene4142	PREDICTED: putative disease resistance protein RGA3-like [Cucumis sativus]	Disease resistance protein RPH8A OS=Arabidopsis thaliana GN=RPH8A PE=3 SV=1	DNA-directed RNA polymerases I, II, and III subunit RPABC1	7.0271	4.7589	Down
	Unigene1979	hypothetical protein PRUPE_ppa022038mg [Prunus persica]	Putative disease resistance protein At3g14460 OS=Arabidopsis thaliana GN=At3g14460 PE=3 SV=1	DNA-directed RNA polymerases I, II, and III subunit RPABC1	5.9983	4.0325	Down
	Unigene3811	unnamed protein product [Vitis vinifera]	Ras-related protein RABC1 OS=Arabidopsis thaliana GN=RABC1 PE=2 SV=1	Ras-related protein Rab-18	62.8005	41.1301	Down
	Unigene672	RecName: Full=Pleiotropic drug resistance protein 3; AltName: Full=NtPDR3 >gi|55056942|emb|CAH39853.1| PDR-like ABC transporter [Nicotiana tabacum]	Pleiotropic drug resistance protein 3 OS=Nicotiana tabacum GN=PDR3 PE=2 SV=1	--	9.3706	5.9916	Down
	CL8275.Contig3	unknown [Picea sitchensis] >gi|116784353|gb|ABK23312.1| unknown [Picea sitchensis]	Ras-related protein RABC2a OS=Arabidopsis thaliana GN=RABC2A PE=1 SV=1	Ras-related protein Rab-18	3.1511	2.0148	Down
	Unigene17412	ABC1 family protein [Arabidopsis lyrata subsp. lyrata] >gi|297315165|gb|EFH45588.1| ABC1 family protein [Arabidopsis lyrata subsp. lyrata]	Uncharacterized aarF domain-containing protein kinase At4g31390, chloroplastic OS=Arabidopsis thaliana GN=At4g31390 PE=1 SV=1	aarF domain-containing kinase	6.111	3.8744	Down
	CL4437.Contig3	PREDICTED: DNA-directed RNA polymerases I, II, and III subunit RPABC4-like [Vitis vinifera] >gi|225468167|ref|XP_002272054.1| PREDICTED: DNA-directed RNA polymerases I, II, and III subunit RPABC4 [Vitis vinifera] >gi|297738145|emb|CBI27346.3| unnamed protein product [Vitis vinifera]	--	DNA-directed RNA polymerases I, II, and III subunit RPABC4	38.3664	24.2978	Down
[truncated: 33 more rows]

## Sheet: Table S8
Table S8 List of MDR unigenes along with their expression
[truncated: 230 more rows]

[truncated: 3 more sheets: Table S9, Table S10, Table S11]
